# Supplementary material for: Identification of Unannotated Small Genes in Salmonella
Source: Oxford University Press journal article supplement (doi:10.1534/g3.116.036939), 2017-01-26
Supplement: 036939_figures1.pdf [file 036939_figures1.pdf]

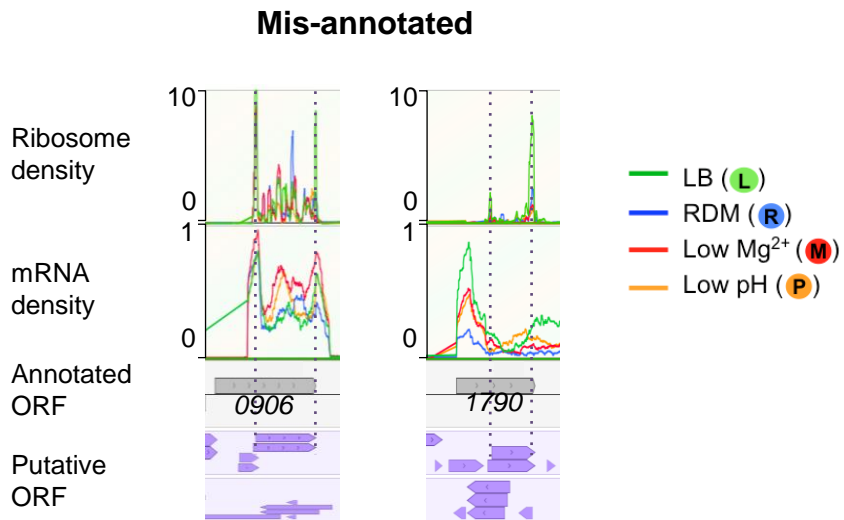

**Figure S1** Two examples of mis-annotated genes. STM14\_0906 and STM14\_1790 were identified as being mis-annotated.
