# Supplementary material for: Identification of Unannotated Small Genes in Salmonella
Source: Oxford University Press journal article supplement (doi:10.1534/g3.116.036939), 2017-01-26
Supplement: 036939_figures2.pdf [file 036939_figures2.pdf]

## A *Salmonella*-specific

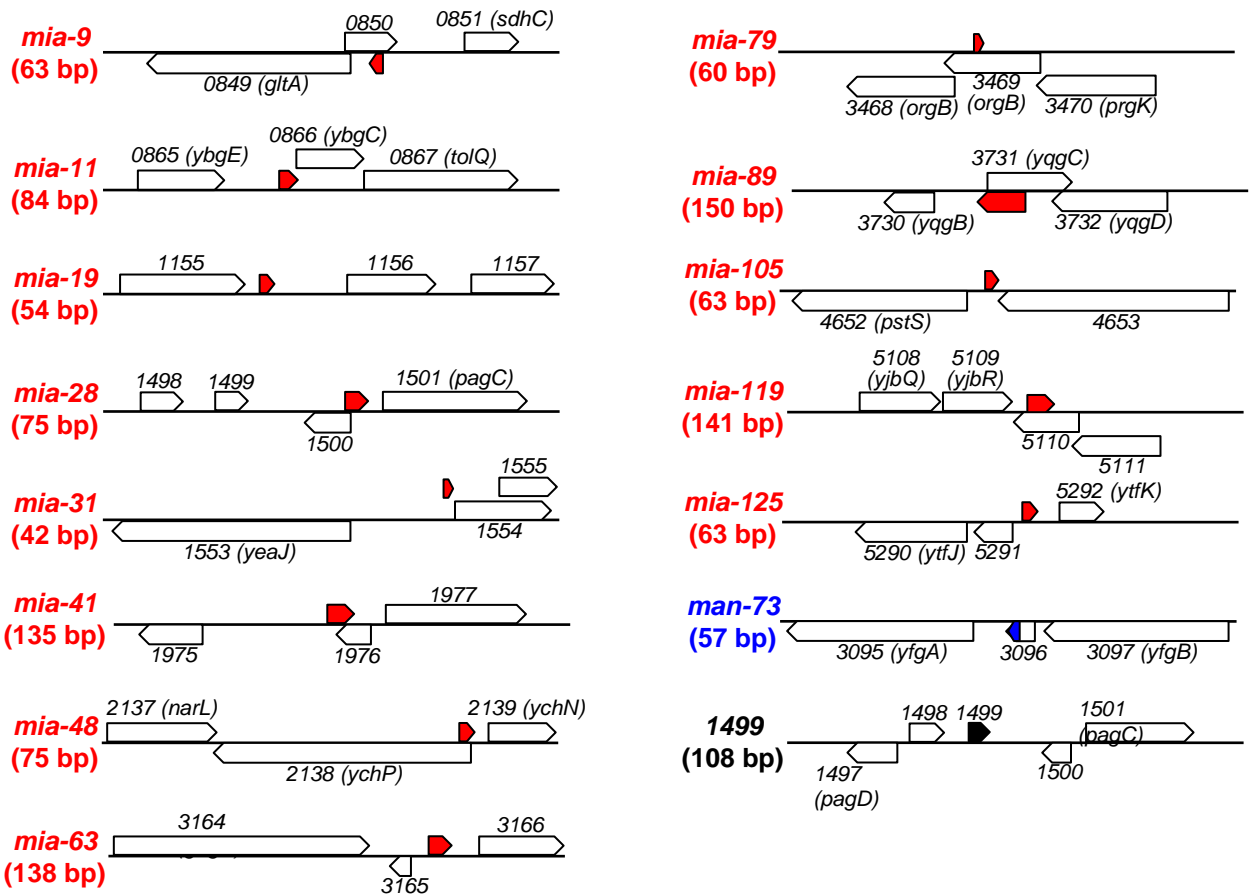

## B Conserved in *Enterobacteriaceae*

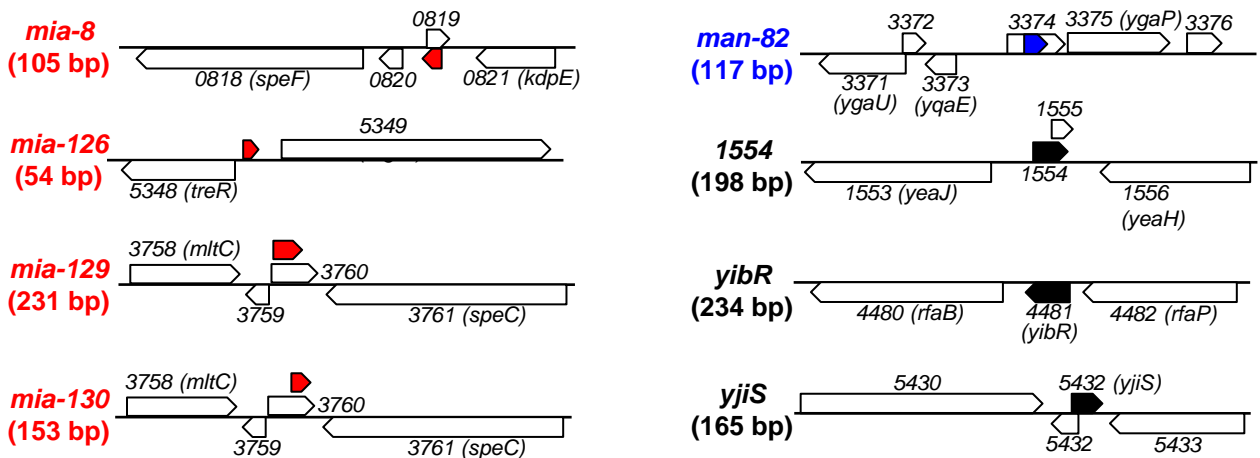

## C Unassigned

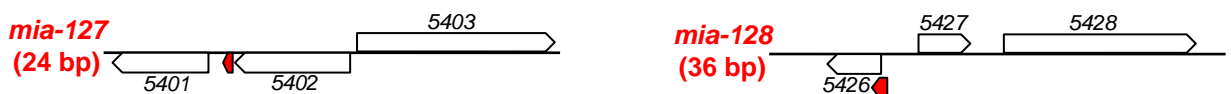

**Figure S2** Genetic organization of (*mia* and *man*) sORFs and small annotated genes whose expression is validated by western blot.
