# Supplementary material for: Identification of Unannotated Small Genes in Salmonella
Source: Oxford University Press journal article supplement (doi:10.1534/g3.116.036939), 2017-01-26
Supplement: 036939_files2.pdf [file 036939_files2.pdf]

**Table S1** Oligonucleotides used for the depletion of rRNA and tRNA

| Name  | Nucleotide sequence                                       |
|-------|-----------------------------------------------------------|
| rRNA1 | 5'/_/5Biosg <sup>a</sup> /TCATCTCCGGGGGTAGAGCACTGTTTCG_3' |
| rRNA2 | 5'/_/5Biosg/GGCTAAACCATGCACCGAAGCTGCGGCAG_3'              |
| rRNA3 | 5'/_/5Biosg/AACACTGAGGCGTGACGACGAGGCACT_3'                |
| rRNA4 | 5'/_/5Biosg/CGGTGCTGAAGCAACAAATGCCCTGCTT_3'               |
| rRNA5 | 5'/_/5Biosg/CTCCTGATCGAAGCCCCGGTAAACGGCG_3'               |
| rRNA6 | 5'/_/5Biosg/CTTGCCCCGAGATGAGTTCTCCCTGAGA_3'               |
| tRNA1 | 5'/_/5Biosg/GGCGGTAACAGGGGTTCGAATCCCCTAG_3'               |
| tRNA2 | 5'/_/5Biosg/CCCCTTCGTCTAGAGGCCAGGACACC_3'                 |
| tRNA3 | 5'/_/5Biosg/GGACGTGGGGGTTC AAGTCCCCCCCCTC_3'              |
| tRNA4 | 5'/_/5Biosg/GCGGTAGTTCAGTTGGTTAGAATACCT_3'                |

<sup>a</sup>5Biosg: Modification code in IDTDNA for 5' Biotin.

**Table S2** Deep-sequencing statistics of ribosome profiling and transcriptome experiments

| Ribosome profiling (Ribo-seq)       |             |               |     |                              |    |                        |    |                       |                              |      |          |                |   |
|-------------------------------------|-------------|---------------|-----|------------------------------|----|------------------------|----|-----------------------|------------------------------|------|----------|----------------|---|
| Growth media                        | Total reads | Trimmed reads |     | Reads mapped to rRNA or tRNA |    | Reads mapped to genome |    |                       | Reads mapped to pSLT plasmid |      |          | Unmapped Reads |   |
|                                     | No.         | No.           | %   | No.                          | %  | No                     | %  | Coverage <sup>a</sup> | No.                          | %    | Coverage | No.            | % |
| LB                                  | 32,704,873  | 32,548,062    | 100 | 11,971,348                   | 37 | 18,174,976             | 56 | 119                   | 78,802                       | 0.24 | 27       | 2,322,936      | 7 |
| RDM                                 | 17,593,796  | 17,582,807    | 100 | 7,044,760                    | 40 | 9,688,252              | 55 | 61                    | 34,043                       | 0.19 | 11       | 815,752        | 5 |
| Low Mg <sup>2+</sup>                | 31,420,973  | 31,412,150    | 100 | 17,358,286                   | 55 | 13,669,502             | 44 | 89                    | 100,291                      | 0.32 | 34       | 284,071        | 1 |
| Low pH                              | 27,566,313  | 27,501,605    | 100 | 12,798,270                   | 46 | 14,374,391             | 52 | 92                    | 58,322                       | 0.21 | 19       | 270,622        | 1 |
| Transcriptome sequencing (mRNA-seq) |             |               |     |                              |    |                        |    |                       |                              |      |          |                |   |
| Growth media                        | Total reads | Trimmed reads |     | Reads mapped to rRNA or tRNA |    | Reads mapped to genome |    |                       | Reads mapped to pSLT plasmid |      |          | Unmapped Reads |   |
|                                     | No.         | No.           | %   | No.                          | %  | No                     | %  | Coverage <sup>a</sup> | No.                          | %    | Coverage | No.            | % |
| LB                                  | 28,132,254  | 28,122,883    | 100 | 22,685,518                   | 81 | 3,841,521              | 14 | 25                    | 28,059                       | 0.10 | 10       | 1,567,722      | 6 |
| RDM                                 | 34,893,678  | 34,885,425    | 100 | 27,652,407                   | 79 | 5,412,931              | 16 | 35                    | 27,375                       | 0.08 | 9        | 1,792,712      | 5 |
| Low Mg <sup>2+</sup>                | 30,497,687  | 30,389,496    | 100 | 20,814,788                   | 68 | 8,433,000              | 28 | 54                    | 111,480                      | 0.37 | 37       | 1,030,228      | 3 |
| Low pH                              | 27,377,904  | 27,313,213    | 100 | 18,092,550                   | 66 | 8,106,101              | 30 | 54                    | 84,303                       | 0.31 | 29       | 1,030,259      | 4 |

<sup>a</sup>Coverage = (# of reads) X (average size of reads) / (genome or plasmid size)

**Table S3** List of bacterial genomes used in BLAST search

| Bacterial species                                        | Strain         | NCBI Genome/Nucleotide  |
|----------------------------------------------------------|----------------|-------------------------|
| <i>Salmonella bongori</i>                                | NCTC 12419     | NC_015761.1             |
| <i>Salmonella enterica</i> Typhimurium                   | LT2            | AE006468.1              |
|                                                          | T000240        | AP011957.1              |
|                                                          | 4/74           | CP002487.1              |
|                                                          | UK-1           | CP002614.1              |
|                                                          | 798            | CP003386.1              |
|                                                          | U288           | CP003836.1              |
|                                                          | CFSAN001921    | CP006048.1              |
|                                                          | D23580         | FN424405.1              |
|                                                          | SL1344         | FQ312003.1              |
|                                                          | DT104          | HF937208.1              |
| <i>Salmonella enterica</i> Paratyphi                     | ATCC 9150      | NC_006511.1             |
| <i>Salmonella enterica</i> Typhi                         | CT18           | NC_003198.1             |
| <i>Escherichia coli</i>                                  | K-12 MG1655    | U00096.3                |
|                                                          | O157:H7 EC4115 | NC_011353.1             |
|                                                          | UTI89          | NC_007946.1             |
| <i>Enterobacter cloacae</i>                              | ATCC 13047     | NC_014121.1             |
| <i>Serratia marcescens</i>                               | WW4            | NC_020211.1             |
| <i>Shigella dysenteriae</i>                              | 1617           | CP006736.1              |
| <i>Shigella flexneri</i>                                 | 2002017        | NC_017328.1             |
| <i>Klebsiella oxytoca</i>                                | E718           | NC_018106.1             |
| <i>Klebsiella pneumoniae</i>                             | 342            | NC_011283.1             |
| <i>Vibrio cholerae</i> O1 biovar El Tor                  | N16961         | NC_002505.1/NC_002506.1 |
| <i>Yersinia enterocolitica</i> subsp. <i>paleoartica</i> | Y11            | NC_017564.1             |
| <i>Yersinia pestis</i>                                   | A1122          | NC_017168.1             |

**Table S4** Oligonucleotides used in this study

| Name   | Purpose                     | Nucleotide sequence (5' → 3')                                           |
|--------|-----------------------------|-------------------------------------------------------------------------|
| HP1083 | <i>mia</i> -8 SPA tagging   | TGCCACCCGCAATAGTTTCGACTTTCATTTCTTTAATGCCCGGTCCATGGAAAAGAGAAG            |
| HP1084 | <i>mia</i> -8 SPA tagging   | GGTCGGAAAGACCTGTATGCTGAAGTACCCGTAGCAGAAAACTACATATGAATATCCTC<br>CTTAG    |
| HP1085 | <i>mia</i> -8 sequencing    | GCACGATATGCATAATCGCC                                                    |
| HP1112 | STM14_5292 SPA tagging      | TGAAGTTAACCGTCAGGTTATGCGTCTGCAAACCTGAGATGGCGTCCATGGAAAAGAGAAG           |
| HP1113 | STM14_5292 SPA tagging      | CGTTTTTTTTTACTTTTTTAACTACTGCATAGCACTTTTGGTTACATATGAATATCCTCCTT<br>AG    |
| HP1114 | STM14_5292 sequencing       | GCGCCTTAAACTGTTGGGC                                                     |
| HP1115 | <i>mia</i> -79 SPA tagging  | GGTAAAAATTCATTTAGGGCATTAACTGTGCATACCCGACGCTCCATGGAAAAGAGAAG             |
| HP1116 | <i>mia</i> -79 SPA tagging  | GTTTATCTGTCTGCAATAAGGCGCCGAATCACCGGTTTTTACTTACATATGAATATCCTCC<br>TTAG   |
| HP1117 | <i>mia</i> -79 sequencing   | CGCCTGCTGTTCTAATCTTT                                                    |
| HP1118 | <i>mia</i> -126 SPA tagging | TGAACCCACCCCTCTCCCGCGATGGAGAATTTTCCTTTTCCGGTCCATGGAAAAGAGAAG            |
| HP1119 | <i>mia</i> -126 SPA tagging | TGTGTCACTGTCTTACACACCGGTAAGACAGCAGAGGCAGGCTTACATATGAATATCCTC<br>CTTAG   |
| HP1120 | <i>mia</i> -126 sequencing  | GGCGTGACGCTGATGGTGAT                                                    |
| HP1144 | STM14_1829 SPA tagging      | AGGTGGCCAAAATAGCCACAGTGGTGGACGGAAATCCGGCAATTCCATGGAAAAGAGAA<br>G        |
| HP1145 | STM14_1829 SPA tagging      | TGCAATATTTT CAGAATATATTTATGAAATATCAGCAGTAAAATTACATATGAATATCCTCC<br>TTAG |
| HP1146 | STM14_1829 sequencing       | CGCAACATCATCATGAGGAT                                                    |
| HP1147 | <i>mia</i> -89 SPA tagging  | CGGCGCTTCTCAGGATTCCAGAGCCGGCAATGGCGCTGAAGACTCCATGGAAAAGAGAA<br>G        |
| HP1148 | <i>mia</i> -89 SPA tagging  | GAAACCACGAGAAAACCTTTCGTTAACAAGAGCGCCCTTGTTACATATGAATATCCTC<br>CTTAG     |

|        |                             |                                                                        |
|--------|-----------------------------|------------------------------------------------------------------------|
| HP1149 | <i>mia</i> -89 sequencing   | GGCTTGTGGGTTCGTCTTAC                                                   |
| HP1150 | <i>mia</i> -130 SPA tagging | CAAACACGTTTCGCGTTCGCGCAAGTTCGCAACCCGTTGCACATTCCATGGAAAAGAGAAG          |
| HP1151 | <i>mia</i> -130 SPA tagging | AAGGCATTTACACCTTATCCGGCCTGCGAAACAGGGCAAGGATTACATATGAATATCCTC<br>CTTAG  |
| HP1152 | <i>mia</i> -130 sequencing  | CCGTCTTTATGCCGACCTTG                                                   |
| HP1153 | STM14_4481 SPA tagging      | CGCCTTAAAGCAAAAAGAGAGATGTCAGGTAAAAATTACTCTATCCATGGAAAAGAGAA<br>G       |
| HP1154 | STM14_4481 SPA tagging      | TAAAGACTTTAGATATTTAAATAGCAAAAATAGTAATATAACCCTACATATGAATATCCTC<br>CTTAG |
| HP1155 | STM14_4481 sequencing       | GAGTGAGACAAGGATAGACA                                                   |
| HP1156 | <i>mia</i> -125 SPA tagging | CGTAGATATGGTCTATAGTCATATGGCATTAAAATTTGCGCCTTCCATGGAAAAGAGAAG           |
| HP1157 | <i>mia</i> -125 SPA tagging | AGAGTATTACGCCCTTGCGATGCCACAATCGGCCCAACAGTTTTACATATGAATATCCTCC<br>TTAG  |
| HP1158 | <i>mia</i> -125 sequencing  | GCCGATAGTTAATCATATGT                                                   |
| HP1219 | <i>mia</i> -6 SPA tagging   | CTTATGTAAGCGCCTGCAGAGTCGACGAGTTGCCGCTTGATGTCCATGGAAAAGAGAAG            |
| HP1220 | <i>mia</i> -6 SPA tagging   | GTTGTGCCGCCCTTCATTAGTATATACACAAAATCATTTCGAGCTACATATGAATATCCTCC<br>TTAG |
| HP1221 | <i>mia</i> -6 sequencing    | GGCGCATGAATGAACTTATG                                                   |
| HP1222 | <i>mia</i> -9 SPA tagging   | TTACTCGGATTGCTACGTTCCCTGATTTGCTGCTAATTCGAAATTCCATGGAAAAGAGAAG          |
| HP1223 | <i>mia</i> -9 SPA tagging   | ACCTGGGTACAGAGCAATGGGCGCTTGCAGGTAACGACTTGATTACATATGAATATCCTC<br>CTTAG  |
| HP1224 | <i>mia</i> -9 sequencing    | GTCGGGTTTTATCCTGAACA                                                   |
| HP1225 | STM14_1449 SPA tagging      | TGGAGCGTCACGTGAGGACTGTGAAGCACAATGCGATATGTTCTCCATGGAAAAGAGAAG           |
| HP1226 | STM14_1449 SPA tagging      | CGTTCGGCTAAAAACATGTCATTAAGCAAACCTCGCCATATAATCACATATGAATATCCTCC<br>TTAG |
| HP1227 | STM14_1449 sequencing       | CGCGTGTCAATATTTGCGT                                                    |
| HP1228 | <i>mia</i> -28 SPA tagging  | CATAGTGGCGATAACTGAATGCCGGATCGGTAAGTGCAGGTGTTTCCATGGAAAAGAGAAG          |
| HP1229 | <i>mia</i> -28 SPA tagging  | TTCATAACAACCTCTTAATACTACTTATTATTTACGGTGTGTTTACATATGAATATCCTCCT<br>TAG  |
| HP1230 | <i>mia</i> -28 sequencing   | GCCGAACGGTGTCAAGTTTC                                                   |

|        |                             |                                                                       |
|--------|-----------------------------|-----------------------------------------------------------------------|
| HP1231 | <i>mia</i> -31 SPA tagging  | TGAAGTGGTAAGGATAATAATGTACTTCCGTTCCGGAGGCACTATCCATGGAAAAGAGAAG         |
| HP1232 | <i>mia</i> -31 SPA tagging  | GCAATGCAAAAAGAAAATTGTTGCCATTTCTTTAAATCGTTTCACATATGAATATCCTCC<br>TTAG  |
| HP1233 | <i>mia</i> -31 sequencing   | GTCGGATGCGTTAGTTTACC                                                  |
| HP1234 | STM14_1554 SPA tagging      | TTCTCTGCAATTACCGCCACCTCCTGGTGAGTATTGCTGGCATTCCATGGAAAAGAGAAG          |
| HP1235 | STM14_1554 SPA tagging      | ACCTTACATGCGCCGACTTATCACTGAAATACTATGGATTTATTACATATGAATATCCTCC<br>TTAG |
| HP1236 | STM14_1554 sequencing       | CGGCATCGATTTAACTAA                                                    |
| HP1243 | <i>mia</i> -128 SPA tagging | GAGGTGTGATGTGCTGATTGTTATCTGTAATCGCCACACGTTCTCCATGGAAAAGAGAAG          |
| HP1244 | <i>mia</i> -128 SPA tagging | CCGGTGAAAACACAGACAGGAAGAGACGCGTTCTGAATCTCGTCACATATGAATATCCTC<br>CTTAG |
| HP1245 | <i>mia</i> -128 sequencing  | CCAGGATGCTGCGACTCTAC                                                  |
| HP1246 | STM14_5432 SPA tagging      | CGAGCAGTTAAGGGATATCGGGTTGGAAAGGAAGGATGTGGAATCCATGGAAAAGAGAA<br>G      |
| HP1247 | STM14_5432 SPA tagging      | ATCATAAAATCCTTTAATTACTATTGCCCTTGAATAGATTCACTACATATGAATATCCTCCT<br>TAG |
| HP1248 | STM14_5432 sequencing       | CCACGTTGCACTAACCGTGC                                                  |
| HP1249 | <i>mia</i> -129 SPA tagging | TGACCAATGGCTTCGGCTGTATCCTGGGCGGCATTGTGAGCGGTCCATGGAAAAGAGAAG          |
| HP1250 | <i>mia</i> -129 SPA tagging | TGCCAGTCGGTAATGCCGTTTTGAGTGTAATACTCCACCACCTTACATATGAATATCCTCC<br>TTAG |
| HP1251 | <i>mia</i> -129 sequencing  | GCTGCAGCTTAAAATACTCT                                                  |
| HP1252 | <i>mia</i> -105 SPA tagging | TGGCCCGGGGAGACACCAGACCAGCCTGCAGGGGGAGATGAATTCCATGGAAAAGAGAA<br>G      |
| HP1253 | <i>mia</i> -105 SPA tagging | GATGTACGCGCTGTTGAAACCGTCTGCGGTTGCGCAAACAGTCTACATATGAATATCCTCC<br>TTAG |
| HP1254 | <i>mia</i> -105 sequencing  | GCGACAACAGTTGCGACAGT                                                  |
| HP1255 | <i>mia</i> -11 SPA tagging  | TTACGGCGGCAAGCGGATGACGCCAACAAAGAGGCTGCAGGGATCCATGGAAAAGAGAA<br>G      |
| HP1256 | <i>mia</i> -11 SPA tagging  | CTTCGTAATAAACTCGAATTGGCCATCGAAACATATACTTATTCACATATGAATATCCTCC<br>TTAG |

|        |                             |                                                                          |
|--------|-----------------------------|--------------------------------------------------------------------------|
| HP1257 | <i>mia</i> -11 sequencing   | CCGCTCCTTGCGGATATCGT                                                     |
| HP1258 | <i>mia</i> -19 SPA tagging  | ATATGGAAATGTCGGAGCAGAACACCAAGAAGTAAGCGTAATTTCCATGGAAAAGAGAA<br>G         |
| HP1259 | <i>mia</i> -19 SPA tagging  | TTCAGATAAAAGAAAACCCGTACTIONCGGCGGGTTCACATTCATTCACATATGAATATCCTCC<br>TTAG |
| HP1260 | <i>mia</i> -19 sequencing   | GGAGTTCAAGGATACCAGAG                                                     |
| HP1264 | <i>mia</i> -48 SPA tagging  | TGGCAACTTCTACAACAAAAGATAAGAGGAATGACATCAGAGTCCATGGAAAAGAGAA<br>G          |
| HP1265 | <i>mia</i> -48 SPA tagging  | GCACGAGAAAAGGCTGCAAAACCTGTCCGGACACGTTATGGTTTACATATGAATATCCTC<br>CTTAG    |
| HP1266 | <i>mia</i> -48 sequencing   | CACCAGTATCCAGATCGTTA                                                     |
| HP1273 | <i>mia</i> -62 SPA tagging  | CCCAGGTAATTCTGTTCCCGTAACGCTCAACGTCCAGAGCAGGTCCATGGAAAAGAGAAG             |
| HP1274 | <i>mia</i> -62 SPA tagging  | ATCTGAAGAAAAGAAAGCCGCCAACAGGGCGGCCTCCTGGCTTACATATGAATATCCTC<br>CTTAG     |
| HP1275 | <i>mia</i> -62 sequencing   | CGGGAAACTATTCAATATTT                                                     |
| HP1276 | <i>mia</i> -63 SPA tagging  | GATAATACAAAACATTTTTCCAGTGGCTGGCCGCCAGATATCCTCCATGGAAAAGAGAAG             |
| HP1277 | <i>mia</i> -63 SPA tagging  | CAGTATACTAACAACCACAAACCTGAGACCAATTCAGTTGCTTCACATATGAATATCCTCC<br>TTAG    |
| HP1278 | <i>mia</i> -63 sequencing   | GACAGTGAAGTGTGAACTAT                                                     |
| HP1279 | <i>mia</i> -119 SPA tagging | AATAATCATATCGTCGTCGTCAGCCAGCCGCGAGCATGTTCCCTCCATGGAAAAGAGAAG             |
| HP1280 | <i>mia</i> -119 SPA tagging | CGACGCTATCCGCGAGTCCGCCGCGTTTATCGCCCGCGCTTCACATATGAATATCCTCC<br>TTAG      |
| HP1281 | <i>mia</i> -119 sequencing  | CCGGATTCACAACCTCTATTA                                                    |
| HP1282 | <i>mia</i> -127 SPA tagging | TTCAACTCAACCCGAGGCTTTGATGCTGGAGAATGTCATCATCTCCATGGAAAAGAGAAG             |
| HP1283 | <i>mia</i> -127 SPA tagging | ATTGATAATCAGTCCGGCCTGAAAAGGTCGGGTAAGTATTATCACATATGAATATCCTCC<br>TTAG     |
| HP1284 | <i>mia</i> -127 sequencing  | CGCAACAACCCTGTCAATGG                                                     |
| HP1285 | <i>man</i> -8 SPA tagging   | TATGTTTACGCGCTCATTGAACATCAGAGCAAATCAGACCGGCTCCATGGAAAAGAGAAG             |
| HP1286 | <i>man</i> -8 SPA tagging   | ATGGCGGCAATGGCGTAACGCATCAGGCGAAAAGCCATCACATATGAATATCCTCCTTAG             |
| HP1287 | <i>man</i> -8 sequencing    | CGCTGACAGAGTGGTCGCTA                                                     |

|        |                           |                                                                  |
|--------|---------------------------|------------------------------------------------------------------|
| HP1297 | <i>mia-41</i> SPA tagging | ATTCAATCCATTCCCTTTGATGATTCCCTGTCAAACCTCCTGATTCCATGGAAAAGAGAAG    |
| HP1298 | <i>mia-41</i> SPA tagging | GTACTTAACGTTATGTATTCCATCGCTGTAACTAATTTACATATGAATATCCTCCTTAG      |
| HP1299 | <i>mia-41</i> sequencing  | GGCCCTGGATAGAGTGGTAA                                             |
| HP1300 | <i>man-73</i> SPA tagging | AAGGCAGTATGTAATGGTGCAACAAGAGTTTAGCCTTGTGTCTTCCATGGAAAAGAGAAG     |
| HP1301 | <i>man-73</i> SPA tagging | ACAGTATAAGCCTGTCAGGCCGCAGATGACAAAACCGCTACATATGAATATCCTCCTTAG     |
| HP1302 | <i>man-73</i> sequencing  | CGCGTGGCGATGACATTGAT                                             |
| HP1303 | <i>man-82</i> SPA tagging | CGACGTCGCAACATCTGGCGCGGATGCGGGAAGAAGGGCTGATTCCATGGAAAAGAGAA<br>G |
| HP1304 | <i>man-82</i> SPA tagging | AATGAAATAGTGAATGCGCTGGGCATCGCGTTGACTATCACATATGAATATCCTCCTTAG     |
| HP1305 | <i>man-82</i> sequencing  | CGCTGGCATTAGGTTGATGT                                             |
| HP1344 | pTrc99A sequencing        | CGCTCAAGGCGCACTCCCCT                                             |
| HP1352 | SPA cloning into pTrc99A  | AACATCCATGGAAAAGAGAAGATGGAAAA                                    |
| HP1353 | SPA cloning into pTrc99A  | ACGACGTCGACCTACTTGTCATCGTCATCCTTGTAG                             |

---



**Table S5** Length distribution of annotated proteins in 11 *Salmonella enterica* serovar Typhimurium genomes

| <i>Salmonella</i><br>strains | LT2                    | T000240       | <b>14028s</b>               | 4/74          | UK1           | 798           | U288          | CFSAN001921   | D23580        | SL1344        | DT104         |
|------------------------------|------------------------|---------------|-----------------------------|---------------|---------------|---------------|---------------|---------------|---------------|---------------|---------------|
| GenBank                      | AE006468               | AP011957      | <b>CP001363</b>             | CP002487      | CP002614      | CP003386      | CP003836      | CP006048      | FN424405      | FQ312003      | HF937208      |
| ≤ 50 aa                      | 56<br>(1) <sup>a</sup> | 127<br>(3)    | <b>582</b><br><b>(11)</b>   | 179<br>(4)    | 70<br>(2)     | 50<br>(1)     | 133<br>(3)    | 120<br>(3)    | 46<br>(1)     | 59<br>(1)     | 51<br>(1)     |
| 51 aa –<br>100 aa            | 371<br>(8)             | 471<br>(10)   | <b>693</b><br><b>(13)</b>   | 416<br>(9)    | 390<br>(9)    | 365<br>(8)    | 442<br>(10)   | 421<br>(9)    | 377<br>(8)    | 383<br>(9)    | 375<br>(8)    |
| ≤ 100 aa                     | 427<br>(9.6)           | 598<br>(12.7) | <b>1275</b><br><b>(24)</b>  | 595<br>(12.9) | 460<br>(10.3) | 415<br>(9.6)  | 575<br>(12.6) | 541<br>(11.9) | 423<br>(9.5)  | 442<br>(9.9)  | 426<br>(9.5)  |
| 101 aa ≤                     | 4025<br>(90)           | 4124<br>(87)  | <b>4037</b><br><b>(76)</b>  | 4030<br>(87)  | 3995<br>(91)  | 3911<br>(90)  | 4006<br>(87)  | 4020<br>(88)  | 4023<br>(90)  | 4021<br>(90)  | 4070<br>(91)  |
| Total                        | 4452<br>(100)          | 4722<br>(100) | <b>5312</b><br><b>(100)</b> | 4625<br>(100) | 4455<br>(100) | 4326<br>(100) | 4581<br>(100) | 4561<br>(100) | 4446<br>(100) | 4463<br>(100) | 4496<br>(100) |

<sup>a</sup>Number in parenthesis indicates percentage relative to the total number of annotated genes in respective genomes.

**Table S6** List of genes annotated in 14028s but undetected by pORF<sub>noRBS</sub>

| <b>Locus tag</b> | <b>Gene name</b> | <b>Description</b>                 | <b>Notes</b>                      |
|------------------|------------------|------------------------------------|-----------------------------------|
| STM14_980        | ybiV(2)          | putative hydrolase                 | <sup>a</sup> False annotation (?) |
| STM14_1180       |                  | minor tail protein                 | "CTG", unknown                    |
| STM14_1358       |                  | <b>pseudogene</b>                  | No start codon                    |
| STM14_1620       | infC             | translation initiation factor IF-3 | "ATT", Known                      |
| STM14_1766       | malX             | <b>pseudogene</b>                  | No start codon                    |
| STM14_2252       |                  | putative cytoplasmic protein       | <sup>b</sup> Mis-annotated        |
| STM14_2277       |                  | putative cytoplasmic protein       | <sup>a</sup> False annotation (?) |
| STM14_2439       |                  | hypothetical protein               | <sup>b</sup> Mis-annotated        |
| STM14_2450       |                  | portal protein                     | <sup>b</sup> Mis-annotated        |
| STM14_3178       |                  | minor tail-like protein            | <sup>b</sup> Mis-annotated        |
| STM14_3265       |                  | <b>pseudogene</b>                  | No start codon                    |
| STM14_3349       |                  | <b>pseudogene</b>                  | No start codon                    |
| STM14_3673       | prfB             | peptide chain release factor 2     | <sup>b</sup> Mis-annotated        |

|            |      |                                                               |                                   |
|------------|------|---------------------------------------------------------------|-----------------------------------|
| STM14_3942 |      | <b>pseudogene</b> , PTS family galactitol-specific enzyme IIC | No start codon                    |
| STM14_4405 |      | <b>pseudogene</b>                                             | No start codon                    |
| STM14_4596 |      | <b>pseudogene</b>                                             | No start codon                    |
| STM14_4676 | yeiN | regulatory ATPase RavA                                        | <sup>b</sup> Mis-annotated        |
| STM14_4709 |      | putative inner membrane protein                               | <sup>a</sup> False annotation (?) |
| STM14_4714 | rhoL | <b>pseudogene</b>                                             | No start codon                    |
| STM14_4942 |      | <b>pseudogene</b>                                             | No start codon                    |
| STM14_4976 |      | <b>pseudogene</b>                                             | No start codon                    |
| STM14_5033 |      | putative cytoplasmic protein                                  | <sup>b</sup> Mis-annotated        |

<sup>a</sup>No sequencing reads were mapped to these annotated genes in both Ribo-seq and mRNA-seq; <sup>b</sup>Ribo-seq data indicate a new translation start codon for a corrected ORF.

**Table S7** Number of annotated genes detected and undetected by pORF<sub>RBS</sub> in 11 *S. Typhimurium* and *E. coli* K-12 MG1655

|                              | Genbank         | Genome size (nt) | No. of predicted ORFs in pORF <sub>RBS</sub> | Total annotated genes | No. of detected <sup>a</sup> | No. of undetected <sup>b</sup> | % undetected <sup>c</sup> | Annotated small genes (≤100 aa) | No. of annotated small genes undetected | % annotated small genes undetected |
|------------------------------|-----------------|------------------|----------------------------------------------|-----------------------|------------------------------|--------------------------------|---------------------------|---------------------------------|-----------------------------------------|------------------------------------|
| <b><i>S. Typhimurium</i></b> |                 |                  |                                              |                       |                              |                                |                           |                                 |                                         |                                    |
| UK1                          | CP002614        | 4,817,868        | 100,528                                      | 4,455                 | 3,673                        | 782                            | 17.6                      | 460                             | 112                                     | 3                                  |
| U288                         | CP003836        | 4,852,606        | 101,492                                      | 4,581                 | 3,913                        | 668                            | 14.6                      | 575                             | 129                                     | 3                                  |
| LT2                          | AE006468        | 4,857,432        | 101,564                                      | 4,452                 | 3661                         | 791                            | 17.8                      | 427                             | 105                                     | 2                                  |
| CFSAN                        | CP006048        | 4,859,931        | 101,681                                      | 4,561                 | 3,814                        | 747                            | 16.4                      | 541                             | 134                                     | 3                                  |
| <b>14028s</b>                | <b>CP001363</b> | <b>4,870,265</b> | <b>101,767</b>                               | <b>5,312</b>          | <b>3,952</b>                 | <b>1,360</b>                   | <b>25.6</b>               | <b>1,275</b>                    | <b>670</b>                              | <b>13</b>                          |
| 798                          | CP003386        | 4,876,219        | 101,877                                      | 4,326                 | 3,120                        | 1,206                          | 27.9                      | 415                             | 146                                     | 3                                  |
| SL1344                       | FQ312003        | 4,878,012        | 101,956                                      | 4,463                 | 3,643                        | 820                            | 18.4                      | 442                             | 104                                     | 2                                  |
| 4/74                         | CP002487        | 4,878,013        | 101,956                                      | 4,625                 | 3,506                        | 1,119                          | 24.2                      | 595                             | 235                                     | 5                                  |
| D23580                       | FN424405        | 4,879,400        | 102,100                                      | 4,446                 | 3,609                        | 837                            | 18.8                      | 423                             | 107                                     | 2                                  |
| DT104                        | HF937208        | 4,933,631        | 103,567                                      | 4,496                 | 3,589                        | 907                            | 20.2                      | 426                             | 118                                     | 3                                  |
| T000240                      | AP011957        | 4,954,814        | 104,018                                      | 4,722                 | 3,984                        | 738                            | 15.6                      | 598                             | 143                                     | 3                                  |
| <b><i>E. coli</i> K-12</b>   |                 |                  |                                              |                       |                              |                                |                           |                                 |                                         |                                    |
| MG1655                       | U00096          | 4,641,652        | 103,026                                      | 4,140                 | 3,597                        | 543                            | 13.1                      | 423                             | 44                                      | 1                                  |

<sup>a</sup> Number of annotated genes detected by pORF<sub>RBS</sub><sup>b</sup> Number of annotated genes undetected by pORF<sub>RBS</sub><sup>c</sup> % annotated genes undetected by pORF<sub>RBS</sub> (relative to the total number of annotated genes)
