# Supplementary material for: Identification of Unannotated Small Genes in Salmonella
Source: G3 (Bethesda). 2017 Jan 25;7(3):983–9. doi: 10.1534/g3.116.036939 (PMC5345727; doi:10.1534/g3.116.036939)
Supplement: Supplementary file 6 [file 983TableS8.xlsx]

## Sheet: Table S8
Table S8 List of 14028s annotated genes undetected by pORF(RBS)
Locus tag	Gene name	Description	Coordinate (left)	Coordinate (right)	Strand	Length (nt)	Length (aa)	Ribosome density (RPKM) in LB	Ribosome density (RPKM) in RDM	Ribosome density (RPKM) in low Mg2+ (10 µM)	Ribosome density (RPKM) in low pH (5.8)	mRNA density (RPKM) in LB	mRNA density (RPKM) in RDM	mRNA density (RPKM) in Low Mg2+ (10 µM)	mRNA density (RPKM) in low pH (5.8)
STM14_0879	-	hypothetical protein	820227	820322	-	96	31	2.67	8.54	6.1	2.39	691.86	1530.21	635.44	599.03
STM14_3099	-	hypothetical protein	2712052	2712147	+	96	31	2.67	4.88	20.93	5.58	415.74	438.8	389.19	373.85
STM14_5160	-	hypothetical protein	4544189	4544284	+	96	31	0	1.22	2.62	0	6.21	0	1.42	2.89
STM14_1831	-	hypothetical protein	1602970	1603068	-	99	32	1.94	1.18	0	0.77	0	4.32	1.37	2.8
STM14_2456	-	hypothetical protein	2115612	2115710	-	99	32	1.94	0	5.92	3.09	6.02	2.16	26.07	78.38
STM14_4697	ilvL	ilvG operon leader peptide	4122426	4122524	+	99	32	227.36	91.12	428.77	291.67	863.44	326.14	1381.95	953.2
STM14_3901	-	hypothetical protein	3408358	3408459	-	102	33	1.89	5.74	0.82	0	8.76	14.67	35.96	35.32
STM14_4393	-	hypothetical protein	3846344	3846445	+	102	33	0	0	0.82	1.5	32.12	33.54	21.31	23.1
STM14_5038	-	putative cytoplasmic protein	4428296	4428397	+	102	33	3.77	3.45	0.82	0	46.72	18.87	33.3	16.3
STM14_0136	-	hypothetical protein	134689	134793	-	105	34	0	0	0	0	0	4.07	2.59	1.32
STM14_0165	-	putative transcriptional regulator, LysR family	162875	162979	+	105	34	39.09	54.67	31.1	26.99	62.4	107.93	113.87	76.54
STM14_0531	-	hypothetical protein	504670	504774	+	105	34	2.44	4.46	6.38	8.02	774.39	517.26	734.95	529.21
STM14_0597	-	hypothetical protein	570227	570331	+	105	34	10.99	4.46	16.74	2.19	36.88	14.26	28.47	22.44
STM14_0599	-	hypothetical protein	571546	571650	-	105	34	0.61	0	0	0	19.86	32.58	22	18.48
STM14_1286	-	hypothetical protein	1174679	1174783	+	105	34	1.83	0	1.59	1.46	39.71	22.4	24.58	19.8
STM14_1569	-	hypothetical protein	1380898	1381002	+	105	34	8.55	6.69	11.96	3.65	70.91	87.57	108.69	77.86
STM14_1572	-	hypothetical protein	1382785	1382889	+	105	34	6.11	6.69	1.59	2.19	85.1	99.79	122.92	105.58
STM14_1933	-	hypothetical protein	1696703	1696807	+	105	34	26.87	1.12	25.52	5.84	201.4	73.31	329.95	162.33
STM14_1972	-	hypothetical protein	1731028	1731132	-	105	34	0	0	0	0	0	0	1.29	0
STM14_2730	-	hypothetical protein	2361472	2361576	-	105	34	0.61	1.12	0.8	0.73	0	6.11	2.59	1.32
STM14_2822	-	hypothetical protein	2445948	2446052	+	105	34	0	1.12	0	2.92	8.51	4.07	10.35	23.76
STM14_3295	-	hypothetical protein	2881056	2881160	+	105	34	3.05	1.12	1.59	1.46	14.18	6.11	20.7	19.8
STM14_3580	-	hypothetical protein	3140255	3140359	+	105	34	21.99	8.93	18.34	2.92	65.24	32.58	31.05	23.76
STM14_3691	-	hypothetical protein	3236175	3236279	+	105	34	9.77	4.46	2.39	2.92	73.75	26.47	47.88	48.83
STM14_3722	-	hypothetical protein	3260720	3260824	+	105	34	0	0	0	0	2.84	0	1.29	0
STM14_3774	-	hypothetical protein	3302110	3302214	+	105	34	0	0	0.8	0	2.84	0	1.29	0
STM14_3840	-	hypothetical protein	3349441	3349545	-	105	34	0	0	0	0	2.84	2.04	2.59	0
STM14_4075	-	hypothetical protein	3563867	3563971	+	105	34	20.15	31.24	19.93	8.75	751.69	843.1	609.44	661.18
STM14_4277	-	hypothetical protein	3735927	3736031	+	105	34	1.22	0	6.38	2.19	19.86	8.15	27.17	6.6
STM14_4886	-	hypothetical protein	4286951	4287055	-	105	34	0	1.12	1.59	1.46	25.53	26.47	20.7	18.48
STM14_5162	-	hypothetical protein	4546069	4546173	+	105	34	177.11	1228.51	2396.11	1167.13	226.93	401.18	1231.82	666.46
STM14_5225	-	hypothetical protein	4599983	4600087	+	105	34	0	0	0	1.46	11.35	26.47	5.18	6.6
STM14_5455	-	hypothetical protein	4812431	4812535	+	105	34	29.31	18.97	52.63	20.42	416.98	187.36	592.62	253.39
STM14_0225	-	hypothetical protein	221522	221629	-	108	35	6.53	3.25	2.33	2.13	91.01	69.3	93.09	82.12
STM14_0310	-	hypothetical protein	304859	304966	-	108	35	8.91	2.17	6.98	3.55	57.91	81.18	66.67	69.29
STM14_0735	-	hypothetical protein	694969	695076	+	108	35	65.91	90.04	164.35	50.35	154.44	162.35	173.6	209.14
STM14_1092	-	hypothetical protein	1007647	1007754	+	108	35	1.78	3.25	5.43	0.71	2.76	0	7.55	7.7
STM14_1192	-	caudovirales tail fibre assembly protein	1097844	1097951	-	108	35	0	0	0	0	11.03	0	10.06	2.57
STM14_1692	-	hypothetical protein	1493410	1493517	+	108	35	7.72	0	1.55	2.13	198.56	39.6	322.04	207.86
STM14_2171	-	hypothetical protein	1905555	1905662	-	108	35	10.69	2.17	0.78	0.71	824.58	37.62	61.64	89.81
STM14_2676	-	hypothetical protein	2318810	2318917	+	108	35	0	0	0	0	5.52	0	2.52	1.28
STM14_2855	-	hypothetical protein	2475538	2475645	+	108	35	14.84	10.85	4.65	12.77	30.34	11.88	18.87	12.83
STM14_3464	-	hypothetical protein	3032212	3032319	+	108	35	15.44	1.08	1.55	4.26	306.11	7.92	11.32	34.64
STM14_3466	-	hypothetical protein	3033296	3033403	-	108	35	59.38	17.36	41.09	7.09	102.04	5.94	64.16	17.96
STM14_3626	-	hypothetical protein	3183053	3183160	-	108	35	0	1.08	0.78	1.42	0	0	3.77	3.85
STM14_3803	-	hypothetical protein	3322464	3322571	-	108	35	0	1.08	0.78	0	60.67	63.36	69.19	46.19
STM14_3860	-	hypothetical protein	3368291	3368398	+	108	35	30.28	10.85	16.28	13.47	606.71	312.82	686.86	445.23
STM14_3965	-	hypothetical protein	3464611	3464718	-	108	35	14.25	31.46	9.3	3.55	1241	1015.69	784.98	816.03
STM14_4233	-	hypothetical protein	3690393	3690500	-	108	35	0.59	0	0.78	0	8.27	3.96	10.06	6.42
STM14_4565	-	hypothetical protein	3999123	3999230	-	108	35	5.94	3.25	1.55	0.71	57.91	39.6	26.42	38.49
STM14_4567	-	hypothetical protein	3999764	3999871	-	108	35	0	0	0.78	1.42	27.58	9.9	62.9	39.78
STM14_4953	-	hypothetical protein	4348703	4348810	+	108	35	0	1.08	3.1	1.42	88.25	152.45	142.15	165.52
STM14_5273	-	hypothetical protein	4642921	4643028	+	108	35	2.97	1.08	5.43	1.42	0	5.94	1.26	1.28
STM14_5474	-	hypothetical protein	4824998	4825105	+	108	35	1.19	2.17	7.75	0.71	79.98	65.34	42.77	35.93
STM14_0027	-	hypothetical protein	24316	24426	+	111	36	0	0	0	0	2.68	1.93	2.45	4.99
STM14_0397	-	hypothetical protein	385733	385843	-	111	36	0.58	0	0	0	0	0	0	0
STM14_0479	-	DNA metabolism protein	461340	461450	+	111	36	2.31	8.44	2.26	4.83	238.81	335.19	363.52	355.79
STM14_0509	-	hypothetical protein	484792	484902	-	111	36	0	0	0	0	2.68	0	3.67	0
STM14_0698	-	hypothetical protein	661861	661971	+	111	36	15.02	6.33	46.76	10.35	284.42	17.34	342.72	57.43
STM14_0730	-	hypothetical protein	692333	692443	+	111	36	0	0	0.75	0.69	0	13.48	4.9	2.5
STM14_1282	-	hypothetical protein	1172347	1172457	+	111	36	16.18	1.06	46.76	5.52	214.66	19.26	237.45	78.65
STM14_1653	-	hypothetical protein	1452728	1452838	-	111	36	0	0	0	0	0	0	0	0
STM14_1973	-	hypothetical protein	1731115	1731225	+	111	36	0	0	0	0	2.68	0	0	0
STM14_2079	-	hypothetical protein	1824904	1825014	+	111	36	1.73	0	3.77	0.69	0	0	3.67	2.5
STM14_2180	-	hypothetical protein	1914824	1914934	-	111	36	16.75	8.44	6.03	0.69	13.42	3.85	2.45	0
STM14_2219	-	hypothetical protein	1946749	1946859	-	111	36	10.98	2.11	6.03	6.9	75.13	9.63	29.38	47.44
STM14_3123	-	hypothetical protein	2735883	2735993	-	111	36	16.18	66.5	23.38	6.21	166.36	337.12	184.82	173.53
STM14_3394	-	hypothetical protein	2979522	2979632	+	111	36	18.49	10.55	22.63	4.83	50.98	9.63	24.48	24.97
STM14_3411	-	hypothetical protein	2991063	2991173	+	111	36	2.89	4.22	6.79	5.52	128.8	82.83	127.29	84.89
STM14_3535	-	hypothetical protein	3092010	3092120	-	111	36	54.88	77.05	58.08	37.26	402.49	489.3	288.86	272.15
STM14_3628	-	hypothetical protein	3183985	3184095	+	111	36	90.7	74.94	23.38	10.35	158.31	104.02	93.02	62.42
STM14_3700	-	hypothetical protein	3243685	3243795	+	111	36	1.16	0	0.75	0	10.73	11.56	20.81	7.49
STM14_3790	-	hypothetical protein	3312496	3312606	-	111	36	0	0	1.51	0	2.68	3.85	6.12	3.75
STM14_3834	-	hypothetical protein	3344530	3344640	+	111	36	1.73	0	0	0	0	0	0	1.25
STM14_3897	-	hypothetical protein	3404350	3404460	+	111	36	0.58	0	0.75	0	10.73	5.78	6.12	2.5
STM14_3996	-	hypothetical protein	3490436	3490546	-	111	36	1.16	0	4.53	5.52	724.48	271.62	1474.9	1107.32
STM14_4095	-	hypothetical protein	3580370	3580480	+	111	36	0	0	0.75	0.69	18.78	104.02	39.17	81.15
STM14_5315	-	hypothetical protein	4679544	4679654	+	111	36	0	0	0	0	5.37	1.93	0	2.5
STM14_0015	-	hypothetical protein	14845	14958	+	114	37	1.13	2.06	0	0	2.61	13.13	1.19	0
STM14_0215	-	hypothetical protein	213058	213171	-	114	37	24.75	75.02	185.07	24.19	412.8	566.46	498.16	460.69
STM14_0411	-	hypothetical protein	399120	399233	+	114	37	0.56	0	0.73	0	7.84	0	0	3.65
STM14_0446	-	hypothetical protein	433714	433827	+	114	37	66.38	12.33	90.33	8.06	41.8	9.38	71.51	21.88
STM14_0528	-	hypothetical protein	502053	502166	-	114	37	0	0	3.67	4.7	376.22	285.11	241.93	453.4
STM14_0800	-	hypothetical protein	749621	749734	+	114	37	5.06	2.06	2.94	0.67	62.7	95.66	57.21	58.35
STM14_0812	-	hypothetical protein	758607	758720	+	114	37	3.38	2.06	0.73	3.36	52.25	58.15	79.85	74.15
STM14_0820	-	conserved hypothetical protein	766472	766585	+	114	37	724.52	41.11	80.79	277.48	146.31	7.5	23.84	100.89
STM14_1104	-	hypothetical protein	1019641	1019754	+	114	37	6.75	0	2.2	0.67	54.87	7.5	47.67	14.59
STM14_1249	-	hypothetical protein	1146275	1146388	-	114	37	9.56	7.19	16.16	2.69	20.9	15.01	17.88	17.02
STM14_1545	-	hypothetical protein	1364743	1364856	-	114	37	32.06	38.03	45.53	34.27	47.03	28.14	48.86	46.19
STM14_1638	-	hypothetical protein	1437586	1437699	-	114	37	1.69	2.06	1.47	0.67	5.23	0	2.38	4.86
STM14_1961	-	hypothetical protein	1719701	1719814	+	114	37	12.94	30.83	18.36	20.16	60.09	52.52	79.85	51.05
STM14_2065	-	hypothetical protein	1812029	1812142	+	114	37	0	0	0	0	36.58	88.16	50.05	14.59
STM14_2635	-	hypothetical protein	2282708	2282821	-	114	37	3.38	3.08	7.34	11.42	2111.01	180.07	759.16	2100.45
STM14_2671	-	hypothetical protein	2315124	2315237	-	114	37	0	0	0	0	10.45	5.63	28.6	7.29
STM14_3079	-	hypothetical protein	2685671	2685784	+	114	37	4.5	7.19	5.14	5.37	222.07	223.21	237.16	307.53
STM14_3081	-	hypothetical protein	2685854	2685967	-	114	37	1.69	0	1.47	0.67	2.61	1.88	7.15	2.43
STM14_3273	-	hypothetical protein	2866637	2866750	-	114	37	1.13	1.03	2.94	1.34	10.45	7.5	0	7.29
STM14_3326	-	hypothetical protein	2919626	2919739	-	114	37	2.25	1.03	2.94	0.67	10.45	0	7.15	3.65
STM14_3364	-	hypothetical protein	2957937	2958050	+	114	37	3.94	1.03	3.67	0.67	96.67	0	8.34	8.51
STM14_4224	-	hypothetical protein	3680653	3680766	+	114	37	0.56	1.03	0	1.34	44.41	37.51	103.68	98.46
STM14_4361	-	hypothetical protein	3818231	3818344	+	114	37	14.06	9.25	4.41	0	172.43	106.91	77.47	53.48
STM14_4551	-	hypothetical protein	3989051	3989164	-	114	37	1.69	1.03	3.67	0.67	26.13	35.64	26.22	14.59
STM14_5096	-	putative cytoplasmic protein	4474899	4475012	+	114	37	7.31	12.33	5.14	4.7	700.19	41.27	119.18	44.97
STM14_5183	-	hypothetical protein	4571436	4571549	+	114	37	3.94	4.11	2.2	2.69	5.23	1.88	5.96	1.22
STM14_5406	-	hypothetical protein	4772201	4772314	+	114	37	2.25	0	3.67	0	7.84	3.75	38.14	1.22
STM14_0296	-	hypothetical protein	291760	291876	+	117	38	9.32	36.05	10.02	20.95	8795.21	15949.5	1896.26	2994.09
STM14_1540	-	hypothetical protein	1363413	1363529	-	117	38	90.98	153.21	118.07	51.72	94.19	56.66	80.12	65.14
STM14_1816	-	hypothetical protein	1591641	1591757	-	117	38	0	1	2.15	0	58.55	73.1	60.38	39.08
STM14_2187	-	hypothetical protein	1920441	1920557	+	117	38	1.64	1	2.86	0.65	201.11	78.59	183.47	75.8
STM14_2321	-	hypothetical protein	2013869	2013985	+	117	38	0	2	0	0.65	58.55	102.35	45.29	72.25
STM14_2343	-	hypothetical protein	2034145	2034261	+	117	38	0	0	5.01	1.96	33.09	7.31	49.93	55.67
STM14_2803	-	hypothetical protein	2425164	2425280	-	117	38	60.84	116.16	33.63	18.33	188.38	369.18	173.02	214.37
STM14_2811	-	hypothetical protein	2432657	2432773	+	117	38	2.19	2	2.86	0.65	15.27	10.97	13.93	4.74
STM14_2871	-	hypothetical protein	2491241	2491357	-	117	38	6.58	5.01	5.01	7.86	847.7	334.45	627.06	736.68
STM14_2921	-	hypothetical protein	2537322	2537438	+	117	38	0	0	1.43	2.62	211.29	135.24	241.53	175.29
STM14_3086	-	hypothetical protein	2702354	2702470	+	117	38	0	1	0.72	1.31	5.09	5.48	2.32	3.55
STM14_3230	-	hypothetical protein	2831002	2831118	-	117	38	3.29	2	4.29	0	30.55	27.41	30.19	13.03
STM14_3260	-	hypothetical protein	2855915	2856031	+	117	38	5.48	4.01	3.58	7.2	178.2	67.62	88.25	86.46
STM14_3372	-	hypothetical protein	2965822	2965938	+	117	38	619.34	14.02	348.49	38.62	173.1	9.14	82.45	35.53
STM14_3382	-	hypothetical protein	2969378	2969494	-	117	38	120.58	39.05	69.41	17.02	43.28	9.14	15.1	22.5
STM14_3642	-	hypothetical protein	3197131	3197247	-	117	38	2.19	0	0.72	0.65	5.09	5.48	9.29	7.11
STM14_3800	-	hypothetical protein	3319990	3320106	-	117	38	1.64	0	0.72	0	2.55	0	0	0
STM14_4243	-	hypothetical protein	3700901	3701017	-	117	38	133.73	125.17	102.33	85.1	127.28	138.9	179.99	158.71
STM14_4291	-	hypothetical protein	3747318	3747434	-	117	38	0	0	0	0	5.09	20.1	8.13	13.03
STM14_4797	-	hypothetical protein	4211633	4211749	+	117	38	8.22	45.06	15.74	20.29	8701.03	16062.8	1947.36	3015.41
STM14_4951	-	hypothetical protein	4346784	4346900	+	117	38	9.87	10.01	9.3	12.44	86.55	169.97	210.18	260.56
STM14_4970	-	hypothetical protein	4366598	4366714	+	117	38	10.41	47.06	15.03	20.95	8802.85	15799.6	1974.07	2939.61
STM14_5113	-	putative cytoplasmic protein	4489545	4489661	+	117	38	59.74	82.11	63.69	11.78	119.65	95.04	88.25	61.59
STM14_5356	-	hypothetical protein	4718450	4718566	-	117	38	0	0	1.43	0	0	1.83	1.16	1.18
STM14_0128	-	putative lipoprotein	127427	127546	-	120	39	63.59	32.22	16.05	57.44	2405.06	1601.94	1769.61	2092.43
STM14_0420	-	hypothetical protein	409118	409237	-	120	39	2.67	0	1.4	0.64	203.52	3.56	113.22	24.25
STM14_0436	-	hypothetical protein	425565	425684	+	120	39	0.53	0.98	0.7	0	2.48	5.35	4.53	2.31
STM14_956	-	hypothetical protein	891948	892067	+	120	39	1.6	2.93	0	1.28	29.78	19.6	26.04	11.55
STM14_958	-	hypothetical protein	892325	892444	-	120	39	0.53	0.98	1.4	2.55	29.78	1.78	20.38	15.01
STM14_995	-	hypothetical protein	924480	924599	-	120	39	34.2	51.75	124.89	99.57	79.42	87.31	150.58	159.36
STM14_1133	-	hypothetical protein	1051307	1051426	-	120	39	6.95	3.91	8.37	4.47	22.34	12.47	9.06	11.55
STM14_1280	-	hypothetical protein	1170167	1170286	-	120	39	0	0	0.7	1.28	516.26	51.68	83.78	102.77
STM14_1631	-	hypothetical protein	1432577	1432696	-	120	39	18.17	19.53	74.65	20.42	39.71	48.11	174.36	65.82
STM14_1767	-	hypothetical protein	1549052	1549171	-	120	39	1.6	1.95	2.09	0.64	161.33	101.57	152.84	83.14
STM14_1919	-	hypothetical protein	1683664	1683783	-	120	39	1.6	0.98	1.4	0.64	89.35	21.38	70.2	73.9
STM14_1922	-	hypothetical protein	1686850	1686969	+	120	39	169.94	17.57	35.58	3.19	146.44	16.04	30.57	12.7
STM14_2123	-	hypothetical protein	1863160	1863279	-	120	39	5.34	9.76	10.47	18.51	665.18	1302.58	499.29	480.38
STM14_2271	-	hypothetical protein	1976808	1976927	+	120	39	39.01	2.93	9.07	24.25	119.14	8.91	48.68	107.39
STM14_2277	-	putative cytoplasmic protein	1979524	1979643	-	120	39	48.63	22.46	46.05	82.98	1737.4	183.54	1294.09	674.38
STM14_2294	-	hypothetical protein	1992755	1992874	-	120	39	3.21	4.88	6.28	2.55	37.23	14.26	38.49	32.33
STM14_2417	-	hypothetical protein	2088843	2088962	+	120	39	0	0	0	0	2.48	5.35	3.4	4.62
STM14_2697	-	hypothetical protein	2338065	2338184	+	120	39	110.08	0	1.4	6.38	568.38	12.47	43.02	49.65
STM14_2718	-	conserved hypothetical protein	2352991	2353110	-	120	39	18.7	10.74	20.93	6.38	29.78	16.04	16.98	10.39
STM14_3508	-	hypothetical protein	3068687	3068806	+	120	39	0	0	0	0	9.93	8.91	4.53	2.31
STM14_3798	-	hypothetical protein	3318584	3318703	+	120	39	8.02	5.86	4.19	1.91	91.83	39.2	49.82	26.56
STM14_3933	-	hypothetical protein	3436575	3436694	+	120	39	0	0	0	0	2.48	0	1.13	0
STM14_4034	-	hypothetical protein	3525086	3525205	+	120	39	5.34	4.88	2.09	3.19	531.15	678.91	370.22	375.3
STM14_4485	-	hypothetical protein	3932731	3932850	-	120	39	3.21	0	3.49	0.64	2.48	3.56	9.06	2.31
STM14_4837	-	hypothetical protein	4248232	4248351	-	120	39	0	0	2.09	1.28	7.45	1.78	3.4	0
STM14_4914	-	hypothetical protein	4310547	4310666	+	120	39	19.77	15.62	22.33	14.68	24.82	49.89	191.34	64.67
STM14_4934	-	hypothetical protein	4332008	4332127	-	120	39	5.34	23.43	27.91	10.85	12.41	24.95	49.82	33.49
STM14_5374	-	putative cytoplasmic protein	4734836	4734955	-	120	39	6.41	8.79	6.28	4.47	744.6	643.27	660.06	563.52
STM14_0021	-	hypothetical protein	17665	17787	+	123	40	0	0	0	0	0	0	0	1.13
STM14_0141	-	hypothetical protein	138755	138877	-	123	40	3.13	0.95	10.89	11.83	401.96	102.57	993.01	524.99
STM14_0291	-	hypothetical protein	289581	289703	-	123	40	0.52	0.95	5.45	9.96	980.7	3490.8	1071.43	1818.33
STM14_0451	-	hypothetical protein	437620	437742	+	123	40	4.17	1.91	28.59	5.6	82.33	62.58	978.65	69.85
STM14_965	-	hypothetical protein	898059	898181	-	123	40	82.9	5.72	33.35	14.94	230.04	15.65	86.16	125.05
STM14_1593	-	hypothetical protein	1401610	1401732	+	123	40	1.56	0.95	2.04	0	31.48	10.43	50.81	21.41
STM14_1923	-	hypothetical protein	1686958	1687080	-	123	40	13.03	1.91	6.13	3.11	128.34	15.65	55.23	25.91
STM14_2245	-	hypothetical protein	1964429	1964551	+	123	40	0	0.95	0.68	0.62	0	0	2.21	0
STM14_2305	-	hypothetical protein	2002147	2002269	+	123	40	43.27	7.62	42.2	7.47	19.37	6.95	30.93	9.01
STM14_2558	-	hypothetical protein	2195674	2195796	-	123	40	0	0.95	4.76	2.49	43.59	26.08	109.35	63.09
STM14_2725	-	hypothetical protein	2359144	2359266	+	123	40	0	0	0	0	0	0	2.21	1.13
STM14_2729	-	putative inner membrane protein	2361189	2361311	-	123	40	7.82	8.57	2.04	1.25	4.84	12.17	1.1	3.38
STM14_2854	-	hypothetical protein	2475407	2475529	-	123	40	4.17	0	0	1.25	14.53	15.65	5.52	20.28
STM14_3096	-	type IV pilus biogenesis/stability protein PilW	2710094	2710216	-	123	40	8.34	10.48	45.61	6.23	213.09	166.89	148.01	131.81
STM14_3122	-	hypothetical protein	2735856	2735978	+	123	40	44.84	37.15	33.35	51.68	58.12	88.66	56.33	40.56
STM14_3600	-	hypothetical protein	3157563	3157685	+	123	40	6.26	9.53	6.13	3.11	21.79	24.34	17.67	21.41
STM14_3649	-	hypothetical protein	3202193	3202315	+	123	40	6.26	6.67	3.4	1.25	12.11	39.98	7.73	10.14
STM14_4101	-	hypothetical protein	3586043	3586165	+	123	40	0.52	1.91	4.08	5.6	1089.66	1778.43	2156.12	1769.88
STM14_4549	-	hypothetical protein	3986024	3986146	+	123	40	0.52	1.91	0.68	3.11	164.66	140.81	305.97	170.12
STM14_5018	-	hypothetical protein	4407683	4407805	+	123	40	2.61	0	0	0.62	16.95	22.6	41.97	76.61
STM14_5019	-	hypothetical protein	4407796	4407918	-	123	40	4.69	0	2.72	0	7.26	1.74	12.15	6.76
STM14_5031	-	conserved hypothetical protein	4418519	4418641	+	123	40	4.69	3.81	3.4	6.85	196.14	90.4	969.81	206.17
STM14_5132	-	hypothetical protein	4519489	4519611	-	123	40	0.52	0	1.36	3.74	72.64	363.34	226.44	261.37
STM14_5203	-	hypothetical protein	4585245	4585367	-	123	40	7.82	18.1	5.45	1.87	1271.27	128.65	125.92	265.88
STM14_5359	-	conserved hypothetical protein	4721103	4721225	-	123	40	55.78	26.67	0.68	7.47	409.23	219.04	326.95	250.1
STM14_0105	-	hypothetical protein	101349	101474	-	126	41	2.04	0	0.66	0	49.64	15.27	59.3	28.59
STM14_0797	-	hypothetical protein	745470	745595	-	126	41	6.11	8.37	2.66	3.65	78.01	28.85	60.38	24.2
STM14_0819	-	hypothetical protein	766193	766318	-	126	41	0	0	0	0	47.28	0	3.23	17.6
STM14_1019	-	hypothetical protein	942902	943027	+	126	41	0	0	0	0	18.91	1.7	8.63	6.6
STM14_1201	-	hypothetical protein	1106320	1106445	-	126	41	18.83	14.88	12.63	3.65	193.83	171.4	138.02	117.68
STM14_1234	-	hypothetical protein	1135671	1135796	+	126	41	0	0	0	1.82	0	0	16.17	8.8
STM14_1719	-	hypothetical protein	1511477	1511602	+	126	41	1.53	3.72	1.33	2.43	66.19	135.76	57.15	52.79
STM14_1784	-	hypothetical protein	1564099	1564224	+	126	41	107.39	33.47	61.13	68.08	238.75	280.01	258.79	292.54
STM14_1786	-	hypothetical protein	1565234	1565359	+	126	41	15.78	10.23	12.63	6.69	37.82	28.85	16.17	20.9
STM14_2293	-	hypothetical protein	1992662	1992787	+	126	41	2.04	6.51	5.32	1.22	16.55	10.18	30.19	28.59
STM14_2306	-	hypothetical protein	2002264	2002389	-	126	41	0	0	0	0	11.82	0	8.63	2.2
STM14_2798	-	hypothetical protein	2418131	2418256	+	126	41	140.47	108.79	82.4	203.64	4912.01	1900.7	1271.28	5072.16
STM14_3202	-	hypothetical protein	2814160	2814285	-	126	41	37.15	39.05	79.07	168.99	23801.3	14477.6	42228.3	30545.1
STM14_3309	-	hypothetical protein	2905915	2906040	+	126	41	0	0	0	0	0	5.09	6.47	11
STM14_3378	-	hypothetical protein	2968220	2968345	+	126	41	1.02	0	2.66	1.22	14.18	0	6.47	3.3
STM14_3625	-	hypothetical protein	3183029	3183154	+	126	41	0	0.93	0	0	2.36	0	2.16	2.2
STM14_3635	-	conserved hypothetical protein	3190309	3190434	-	126	41	3.05	3.72	3.99	1.22	44.91	16.97	31.27	32.99
STM14_4167	-	hypothetical protein	3626355	3626480	+	126	41	5.09	0	0.66	1.82	89.83	28.85	65.77	34.09
STM14_4333	-	hypothetical protein	3789092	3789217	+	126	41	2.54	0	1.99	1.82	14.18	10.18	19.41	7.7
STM14_4340	-	hypothetical protein	3794140	3794265	+	126	41	0	0	0	0.61	0	1.7	1.08	1.1
STM14_4531	-	hypothetical protein	3973351	3973476	+	126	41	0	0	0.66	0	16.55	0	15.1	45.09
STM14_4589	-	hypothetical protein	4016572	4016697	-	126	41	4.58	1.86	5.98	4.86	7.09	5.09	9.7	6.6
STM14_4784	-	hypothetical protein	4197098	4197223	+	126	41	62.09	57.65	66.45	15.8	122.92	100.13	104.59	82.48
STM14_4816	-	hypothetical protein	4226121	4226246	-	126	41	99.24	117.16	100.34	54.71	933.71	578.7	1698.28	989.8
STM14_4873	-	hypothetical protein	4275986	4276111	+	126	41	0	0.93	0	0	0	0	0	0
STM14_5057	-	hypothetical protein	4441014	4441139	-	126	41	1.02	0	1.33	0	30.73	11.88	37.74	20.9
STM14_5189	-	hypothetical protein	4574725	4574850	+	126	41	22.39	10.23	15.28	9.12	14.18	1.7	8.63	8.8
STM14_0020	-	hypothetical protein	17613	17741	-	129	42	0	0	0	0	0	0	0	0
STM14_0179	-	hypothetical protein	173962	174090	-	129	42	0	2.72	0	2.37	20.78	34.81	27.38	36.52
STM14_0186	-	hypothetical protein	183222	183350	+	129	42	0.5	2.72	0.65	0.59	18.47	13.26	6.32	22.56
STM14_0361	-	hypothetical protein	351322	351450	-	129	42	12.43	7.27	12.98	4.75	2.31	0	14.74	16.11
STM14_0633	-	hypothetical protein	604316	604444	-	129	42	0.99	0	0.65	0	6.93	3.32	6.32	2.15
STM14_1102	-	hypothetical protein	1018831	1018959	+	129	42	4.97	0	3.89	0	18.47	4.97	8.43	1.07
STM14_1496	-	hypothetical protein	1341060	1341188	-	129	42	0.5	0	72.04	4.75	0	0	103.21	1.07
STM14_2148	-	hypothetical protein	1886567	1886695	-	129	42	0	0.91	0.65	0	138.53	61.33	121.12	85.94
STM14_2276	-	hypothetical protein	1979312	1979440	-	129	42	16.4	11.81	36.99	7.72	263.21	77.91	216.96	232.03
STM14_2389	-	hypothetical protein	2067774	2067902	-	129	42	81.03	59.94	1.3	0	136.22	62.99	1.05	5.37
STM14_2461	-	hypothetical protein	2117839	2117967	+	129	42	8.45	4.54	22.07	10.69	131.6	74.59	143.23	360.93
STM14_2705	-	hypothetical protein	2342720	2342848	-	129	42	7.46	3.63	1.95	2.37	64.65	26.52	51.61	32.23
STM14_2834	-	hypothetical protein	2455277	2455405	+	129	42	0	2.72	4.54	2.97	25.4	121	261.19	269.62
STM14_2988	-	hypothetical protein	2595966	2596094	+	129	42	3.48	14.53	7.14	11.87	773.46	923.28	972.1	871.17
STM14_3144	-	hypothetical protein	2759420	2759548	+	129	42	1.99	1.82	2.6	4.16	6.93	6.63	4.21	22.56
STM14_3165	-	hypothetical protein	2782226	2782354	-	129	42	0	0.91	1.3	0	2.31	1.66	17.9	4.3
STM14_3259	-	hypothetical protein	2855709	2855837	+	129	42	4.47	14.53	12.33	9.5	3054.6	7150.84	2738.31	3174.25
STM14_3815	-	hypothetical protein	3332051	3332179	+	129	42	13.42	9.99	5.19	6.53	69.27	36.47	13.69	78.42
STM14_4858	-	hypothetical protein	4265002	4265130	+	129	42	46.73	83.56	65.55	29.69	16.16	11.6	21.06	9.67
STM14_4983	-	hypothetical protein	4375382	4375510	+	129	42	18.39	19.98	15.58	23.16	2350.4	3305.23	1835.72	2575.93
STM14_5063	-	conserved hypothetical protein	4446524	4446652	-	129	42	24.86	7.27	25.96	10.09	0	4.97	16.85	9.67
STM14_5129	-	hypothetical protein	4518503	4518631	-	129	42	0.99	1.82	1.3	0.59	304.77	16.58	313.85	62.3
STM14_5168	-	hypothetical protein	4552110	4552238	+	129	42	3.98	5.45	1.95	5.34	90.04	38.12	97.95	79.49
STM14_5468	-	hypothetical protein	4823006	4823134	+	129	42	2.49	0	0.65	0	41.56	21.55	47.39	26.85
STM14_0057	-	hypothetical protein	57203	57334	+	132	43	4.37	7.1	6.98	7.54	615.99	602.61	505.37	659.26
STM14_0464	-	hypothetical protein	444556	444687	-	132	43	76.27	48.82	95.78	46.42	29.33	35.64	29.85	37.79
STM14_0469	-	hypothetical protein	451315	451446	-	132	43	2.91	0.89	11.42	4.06	13.54	4.86	36.02	9.45
STM14_0683	-	hypothetical protein	644504	644635	-	132	43	0.49	0	1.9	5.22	42.87	1.62	76.17	94.48
STM14_0834	-	putative cytoplasmic protein	781934	782065	+	132	43	3.89	3.55	26.64	1.74	13.54	6.48	38.08	8.4
STM14_970	-	hypothetical protein	900375	900506	-	132	43	101.05	69.23	280.35	55.7	221.12	84.24	955.15	176.36
STM14_1129	-	hypothetical protein	1047995	1048126	-	132	43	1.46	0	5.07	6.38	85.74	61.56	434.35	499.7
STM14_1555	-	salivary secreted protein	1370136	1370267	+	132	43	36.92	18.64	317.77	12.19	20.31	4.86	471.4	13.65
STM14_1890	-	hypothetical protein	1657503	1657634	+	132	43	12.63	5.33	9.51	5.22	18.05	9.72	24.7	11.55
STM14_1902	-	hypothetical protein	1668962	1669093	+	132	43	8.26	9.76	22.2	1.16	15.79	6.48	9.26	9.45
STM14_2076	-	hypothetical protein	1823233	1823364	-	132	43	2.91	4.44	2.54	1.16	137.64	170.09	138.95	78.73
STM14_2238	-	hypothetical protein	1961391	1961522	+	132	43	5.34	4.44	7.61	5.8	72.2	34.02	94.69	41.99
STM14_2339	-	hypothetical protein	2032400	2032531	-	132	43	104.45	73.67	5.07	6.96	435.48	233.27	41.17	73.48
STM14_2524	-	hypothetical protein	2165668	2165799	-	132	43	8.26	4.44	0.63	2.9	49.64	8.1	13.38	48.29
STM14_2724	-	hypothetical protein	2358928	2359059	+	132	43	0	0	2.54	0	18.05	22.68	80.28	68.24
STM14_3730	yqgB	putative inner membrane protein	3270033	3270164	-	132	43	36.44	113.61	69.77	74.27	187.28	487.6	256.29	319.13
STM14_3792	-	hypothetical protein	3314050	3314181	+	132	43	0	0	0.63	0	24.82	4.86	8.23	12.6
STM14_3838	-	hypothetical protein	3346793	3346924	-	132	43	5.83	12.43	9.51	6.38	6.77	27.54	7.2	4.2
STM14_4051	-	malate dehydrogenase	3540466	3540597	-	132	43	857.93	116.27	107.83	182.78	1737.4	273.77	544.48	925.91
STM14_4403	-	hypothetical protein	3852193	3852324	-	132	43	0.49	1.78	1.27	1.16	22.56	16.2	33.97	16.8
STM14_4872	-	hypothetical protein	4275521	4275652	+	132	43	0	0	0	0	4.51	3.24	1.03	3.15
STM14_4894	-	putative cytoplasmic protein	4293605	4293736	+	132	43	3.4	1.78	1.9	0.58	20.31	14.58	15.44	14.7
STM14_5416	-	hypothetical protein	4776976	4777107	-	132	43	1.46	0	0	1.16	2.26	4.86	9.26	15.75
STM14_5435	-	hypothetical protein	4790281	4790412	-	132	43	0	0	0	0	18.05	21.06	27.79	21
STM14_0143	-	hypothetical protein	140204	140338	-	135	44	1.43	0	0.62	0	6.62	6.34	5.03	5.13
STM14_0419	-	hypothetical protein	409084	409218	+	135	44	0	0	0	0	19.86	12.67	9.06	6.16
STM14_997	-	hypothetical protein	925933	926067	+	135	44	0.95	0	1.24	0	6.62	1.58	13.08	6.16
STM14_1618	-	hypothetical protein	1421956	1422090	+	135	44	2.38	0.87	14.26	2.84	282.4	441.91	324.06	401.34
STM14_1782	-	putative amino acid permease	1563882	1564016	-	135	44	15.2	74.64	19.85	20.42	8.82	53.85	13.08	6.16
STM14_1915	-	hypothetical protein	1680342	1680476	+	135	44	0.48	0	1.86	0	0	1.58	0	1.03
STM14_2716	-	hypothetical protein	2351963	2352097	-	135	44	6.18	3.47	3.72	2.84	123.55	101.37	96.61	78.01
STM14_2881	-	hypothetical protein	2499320	2499454	+	135	44	1.43	3.47	0.62	3.4	50.74	750.78	177.12	218.64
STM14_3109	-	hypothetical protein	2726253	2726387	-	135	44	4.28	1.74	3.1	10.78	425.8	289.86	600.81	643.59
STM14_3209	-	prophage DinI	2816906	2817040	+	135	44	33.73	9.55	94.89	18.72	63.98	71.28	75.48	64.67
STM14_3249	-	hypothetical protein	2846371	2846505	+	135	44	229.91	148.4	223.88	124.82	220.62	131.47	177.12	129.33
STM14_3435	-	hypothetical protein	3010214	3010348	-	135	44	5.23	0.87	3.1	2.84	392.71	126.71	270.72	350.02
STM14_3437	-	conserved hypothetical protein	3010872	3011006	-	135	44	0.95	0.87	3.1	1.13	6.62	6.34	7.04	1.03
STM14_3549	-	hypothetical protein	3106978	3107112	-	135	44	0	0	0	0	2.21	0	1.01	1.03
STM14_3773	-	hypothetical protein	3301831	3301965	-	135	44	1.9	0	0	0	231.65	0	7.04	2.05
STM14_3987	-	hypothetical protein	3483983	3484117	+	135	44	10.93	15.62	12.4	11.91	558.18	861.65	661.2	734.94
STM14_4094	-	hypothetical protein	3580182	3580316	-	135	44	2.38	1.74	1.86	0.57	2.21	14.26	4.03	2.05
STM14_4770	-	hypothetical protein	4185870	4186004	-	135	44	0.95	0	2.48	0.57	4.41	3.17	7.04	3.08
STM14_4856	-	hypothetical protein	4263770	4263904	+	135	44	0.48	0	0.62	0	0	0	1.01	1.03
STM14_4868	-	hypothetical protein	4272426	4272560	-	135	44	0	0	0	0	0	1.58	0	0
STM14_4898	-	hypothetical protein	4296957	4297091	-	135	44	2.85	6.07	4.34	4.54	46.33	15.84	17.11	27.71
STM14_5131	-	hypothetical protein	4519322	4519456	-	135	44	5.7	0	8.06	1.7	59.57	9.5	39.25	17.45
STM14_5211	-	hypothetical protein	4591089	4591223	+	135	44	7.6	5.21	12.4	0.57	11.03	19.01	11.07	11.29
STM14_5381	-	hypothetical protein	4741810	4741944	+	135	44	3.33	1.74	1.86	0	0	0	0	3.08
STM14_5479	-	hypothetical protein	4828502	4828636	+	135	44	3.33	0	3.1	4.54	2426.85	79.2	793.03	138.57
STM14_0086	-	hypothetical protein	86109	86246	-	138	45	1.86	0.85	3.03	3.33	407.91	210.73	366.24	438.81
STM14_0144	-	hypothetical protein	140496	140633	+	138	45	2.79	11.04	2.43	2.78	38.85	83.67	36.43	39.16
STM14_0403	-	hypothetical protein	390802	390939	-	138	45	6.97	3.4	3.64	2.78	6.47	4.65	5.91	6.02
STM14_1307	-	hypothetical protein	1188559	1188696	-	138	45	0.46	0	0.61	0	4.32	3.1	13.78	11.05
STM14_1376	-	hypothetical protein	1244261	1244398	-	138	45	39.96	74.71	22.45	10.55	75.54	192.14	63.99	54.22
STM14_1546	-	hypothetical protein	1364774	1364911	+	138	45	4.65	2.55	3.03	1.11	10.79	13.95	1.97	5.02
STM14_1601	-	hypothetical protein	1409372	1409509	+	138	45	0	0	0.61	0	2.16	3.1	8.86	0
STM14_1828	-	peptidyl-dipeptidase dcp	1601786	1601923	+	138	45	0.46	0.85	0	1.11	0	0	0	2.01
STM14_1914	-	hypothetical protein	1680335	1680472	-	138	45	0	0	0	0	0	1.55	0.98	0
STM14_2057	-	hypothetical protein	1807079	1807216	+	138	45	4.65	4.24	10.31	6.11	32.37	4.65	26.58	19.08
STM14_3069	-	putative cytoplasmic protein	2672447	2672584	-	138	45	10.69	1.7	1.21	1.11	25.9	1.55	7.88	3.01
STM14_3229	-	hypothetical protein	2830868	2831005	+	138	45	2.32	0.85	1.21	1.67	30.22	30.99	40.36	32.13
STM14_3528	-	hypothetical protein	3087981	3088118	+	138	45	32.99	20.38	18.81	11.1	215.83	117.76	151.61	121.5
STM14_3560	-	hypothetical protein	3121321	3121458	+	138	45	0	0	0	0	0	3.1	0.98	0
STM14_3702	-	hypothetical protein	3244595	3244732	+	138	45	0.93	0.85	1.21	0.56	21.58	18.59	25.6	23.1
STM14_3789	-	hypothetical protein	3312290	3312427	+	138	45	0	0	4.25	0	0	0	1.97	0
STM14_3833	-	hypothetical protein	3344492	3344629	-	138	45	0.46	0	0.61	0.56	64.75	20.14	33.47	9.04
STM14_3904	-	hypothetical protein	3410298	3410435	+	138	45	2.79	1.7	3.64	3.33	949.64	351.73	982.54	300.24
STM14_4759	-	hypothetical protein	4175211	4175348	-	138	45	78.07	146.03	111.63	28.86	71.22	130.16	78.76	72.3
STM14_5124	-	hypothetical protein	4515420	4515557	+	138	45	0	0	0.61	0.56	8.63	35.64	30.52	15.06
STM14_5427	-	hypothetical protein	4786386	4786523	+	138	45	0.46	0	0	0	12.95	1.55	2.95	2.01
STM14_5440	-	hypothetical protein	4798305	4798442	+	138	45	0.93	0.85	1.21	1.67	15.11	13.95	11.81	19.08
STM14_0227	-	hypothetical protein	224289	224429	-	141	46	24.1	3.32	35.63	3.26	133.08	27.3	175.37	164.12
STM14_0554	rpmJ_1	50S ribosomal protein L36	527312	527452	+	141	46	14.1	19.94	39.19	24.99	109.84	33.36	69.38	42.26
STM14_0715	-	hypothetical protein	678399	678539	-	141	46	16.83	0.83	18.41	1.63	29.57	4.55	12.53	3.93
STM14_0864	-	hypothetical protein	812877	813017	+	141	46	20.92	49.86	64.72	20.64	868.17	1763.71	1155.31	1249.11
STM14_1006	-	hypothetical protein	931103	931243	-	141	46	2.73	2.49	4.16	0	8.45	1.52	4.82	3.93
STM14_1488	-	hypothetical protein	1337312	1337452	+	141	46	0	0	0	0	0	0	0	0.98
STM14_1566	-	hypothetical protein	1379655	1379795	+	141	46	1102.88	1297.9	1799.77	1415.61	1318.1	1229.9	1455.94	1502.67
STM14_1999	-	Rac prophage; integrase	1757094	1757234	+	141	46	12.28	23.27	22.56	11.95	44.36	98.57	63.6	54.05
STM14_2223	-	hypothetical protein	1947556	1947696	+	141	46	5.91	0	5.94	4.89	65.48	34.88	160.91	48.16
STM14_2806	-	hypothetical protein	2428153	2428293	+	141	46	3.64	1.66	0	0.54	128.85	37.91	82.87	67.81
STM14_3783	-	hypothetical protein	3308724	3308864	+	141	46	6.37	2.49	0.59	0.54	67.6	12.13	6.74	3.93
STM14_4343	-	hypothetical protein	3796527	3796667	+	141	46	0.91	1.66	3.56	3.26	21.12	12.13	10.6	7.86
STM14_4368	-	cystathionine gamma-synthase	3822374	3822514	+	141	46	0	0.83	0	0	16.9	43.98	27.94	23.59
STM14_4535	-	hypothetical protein	3974935	3975075	+	141	46	1.82	0	105.1	1.63	23.24	12.13	1050.28	18.67
STM14_4740	-	hypothetical protein	4162570	4162710	+	141	46	20.47	24.1	19.6	27.7	44.36	34.88	73.23	51.1
STM14_4916	-	hypothetical protein	4311024	4311164	-	141	46	17.28	17.45	14.84	15.21	426.69	477.7	604.15	436.35
STM14_4950	-	hypothetical protein	4346732	4346872	+	141	46	0	1.66	4.75	0.54	59.15	92.51	148.39	175.92
STM14_5072	-	hypothetical protein	4451435	4451575	+	141	46	60.49	34.9	62.35	11.95	23.24	15.17	23.13	9.83
STM14_5084	-	hypothetical protein	4462737	4462877	+	141	46	26.83	3.32	1.19	3.8	1127.99	221.41	417.22	374.44
STM14_5520	yjjY	putative inner membrane protein	4869015	4869155	+	141	46	11.82	9.14	14.84	5.43	747.77	482.25	897.08	510.06
STM14_0137	-	hypothetical protein	135067	135210	+	144	47	0	0	0	0	2.07	1.48	2.83	6.74
STM14_0233	-	hypothetical protein	231001	231144	+	144	47	0	0	1.16	0	0	0	0	0
STM14_0242	-	hypothetical protein	239222	239365	+	144	47	3.12	2.44	1.74	1.6	39.3	20.79	22.64	10.59
STM14_0740	-	hypothetical protein	697584	697727	-	144	47	5.79	8.14	6.4	1.6	12.41	13.36	51.89	58.7
STM14_1061	-	hypothetical protein	980033	980176	+	144	47	640.37	35.8	211.05	127.12	506.74	111.37	394.38	302.16
STM14_1506	-	hypothetical protein	1344493	1344636	-	144	47	6.68	4.88	11.05	2.13	43.44	19.3	61.33	37.53
STM14_2246	-	hypothetical protein	1964644	1964787	-	144	47	0	0	0	0	4.14	0	3.77	5.77
STM14_2738	-	hypothetical protein	2365897	2366040	+	144	47	5.79	2.44	2.91	2.13	93.08	46.03	78.31	69.29
STM14_3504	-	hypothetical protein	3067340	3067483	-	144	47	2.23	1.63	25	3.72	10.34	8.91	28.3	7.7
STM14_3579	-	hypothetical protein	3140022	3140165	+	144	47	20.93	5.7	10.47	7.45	107.55	37.12	57.55	46.19
STM14_3778	-	hypothetical protein	3305157	3305300	-	144	47	49.43	3.25	3.49	0.53	86.87	10.39	10.38	7.7
STM14_4296	-	hypothetical protein	3750462	3750605	+	144	47	366.05	409.25	458.16	170.21	688.76	622.18	706.67	464.79
STM14_4339	-	hypothetical protein	3794036	3794179	-	144	47	0	0	0	0	6.21	0	8.49	4.81
STM14_4669	-	hypothetical protein	4094364	4094507	-	144	47	7.13	1.63	4.65	3.72	99.28	120.28	79.25	88.53
STM14_4811	-	hypothetical protein	4222708	4222851	+	144	47	13.36	28.48	19.77	32.98	500.54	2704.05	4559.88	3127.48
STM14_5431	-	putative cytoplasmic protein	4788756	4788899	-	144	47	1.34	0	43.61	0.53	4.14	2.97	180.21	1.92
STM14_0040	-	hypothetical protein	34828	34974	+	147	48	0.44	0.8	0	0.52	0	0	0.92	0
STM14_0491	-	hypothetical protein	469965	470111	+	147	48	30.54	29.49	29.05	29.7	97.25	75.64	59.15	56.56
STM14_1308	-	hypothetical protein	1188894	1189040	-	147	48	0	0	0	0	0	1.45	3.7	3.77
STM14_1652	-	hypothetical protein	1452598	1452744	+	147	48	0	0	0	0	0	0	0	0.94
STM14_2048	-	hypothetical protein	1800491	1800637	-	147	48	0.44	0.8	0.57	0	4.05	1.45	5.55	1.89
STM14_2261	-	conserved hypothetical protein	1973229	1973375	+	147	48	0	0	2.85	1.04	2.03	0	32.35	0.94
STM14_3134	-	conserved hypothetical protein	2746625	2746771	-	147	48	0.87	0.8	1.71	1.04	28.37	8.73	12.02	24.51
STM14_3793	-	hypothetical protein	3314188	3314334	-	147	48	0	0	0	0	4.05	0	0.92	0
STM14_4424	-	hypothetical protein	3869165	3869311	-	147	48	0	0	1.14	0.52	0	0	0	0
STM14_5212	-	hypothetical protein	4591232	4591378	-	147	48	46.24	24.71	59.8	35.43	58.76	30.55	56.38	48.08
STM14_0457	-	hypothetical protein	440792	440941	+	150	49	37.19	83.57	72.56	5.11	39.71	18.53	28.98	33.26
STM14_0472	-	hypothetical protein	453755	453904	-	150	49	0.43	1.56	1.12	2.04	87.37	239.49	187.49	214.32
STM14_0745	-	hypothetical protein	700128	700277	+	150	49	46.17	26.56	9.49	28.08	129.06	109.77	131.33	120.1
STM14_0777	-	conserved hypothetical protein	733102	733251	-	150	49	8.55	10.15	16.19	16.85	555.97	429.08	590.55	473.91
STM14_1500	-	hypothetical protein	1342043	1342192	-	150	49	16.25	7.81	1635.97	21.96	19.86	15.68	1685.6	49.89
STM14_1510	-	putative inner membrane protein	1346067	1346216	-	150	49	0	0.78	2.79	4.08	687.02	193.87	1077.84	1224.97
STM14_1524	-	hypothetical protein	1356451	1356600	-	150	49	1.71	0	3.35	0.51	41.7	24.23	52.53	28.64
STM14_1530	-	putative cytoplasmic protein	1359596	1359745	-	150	49	1.71	1.56	1.12	0	11.91	1.43	8.15	5.54
STM14_2349	-	hypothetical protein	2038156	2038305	+	150	49	0	0	0.56	0	0	0	0	1.85
STM14_3826	-	putative inner membrane protein	3338987	3339136	-	150	49	214.18	62.49	248.94	56.17	248.2	61.3	210.13	232.8
STM14_3872	-	hypothetical protein	3377873	3378022	-	150	49	14.54	9.37	40.19	2.55	19.86	7.13	19.02	10.16
STM14_4018	-	hypothetical protein	3508092	3508241	-	150	49	0	0	0	1.53	15.88	51.32	97.82	121.94
STM14_4229	-	hypothetical protein	3684140	3684289	-	150	49	0.86	0	1.67	1.02	21.84	18.53	3.62	14.78
STM14_4709	-	putative inner membrane protein	4133205	4133354	+	150	49	14.54	17.18	5.58	2.04	15.88	4.28	12.68	12.01
STM14_4867	-	hypothetical protein	4272347	4272496	+	150	49	0.43	0	0	0	3.97	0	3.62	0.92
STM14_1118	-	hypothetical protein	1033792	1033944	-	153	50	7.96	14.55	12.04	4.51	50.61	23.76	32.86	20.83
STM14_1131	-	hypothetical protein	1049521	1049673	+	153	50	0.84	3.06	0	0	5.84	2.8	7.99	8.15
STM14_1895	-	hypothetical protein	1663489	1663641	+	153	50	4.19	0	2.19	3.5	33.09	13.98	23.98	43.47
STM14_1976	-	hypothetical protein	1733662	1733814	-	153	50	5.87	6.89	41.04	13.02	7.79	4.19	57.72	18.11
STM14_2710	-	hypothetical protein	2345635	2345787	-	153	50	0	0	0	0	0	0	0.89	0
STM14_2872	-	putative cytoplasmic protein	2491445	2491597	-	153	50	3.35	4.59	0.55	2	159.63	47.52	87.91	64.3
STM14_3342	-	hypothetical protein	2936297	2936449	-	153	50	0	1.53	1.09	0	7.79	16.77	5.33	0
STM14_3355	-	hypothetical protein	2950805	2950957	-	153	50	23.05	10.72	103.42	7.51	40.88	9.78	352.53	31.7
STM14_3751	-	hypothetical protein	3285668	3285820	-	153	50	8.8	6.13	7.11	3.5	23.36	18.17	15.98	10.87
STM14_4180	-	hypothetical protein	3635785	3635937	+	153	50	2.51	0.77	2.19	1	9.73	11.18	10.66	6.34
STM14_5413	-	hypothetical protein	4775969	4776121	+	153	50	3.77	1.53	2.19	1.5	1.95	4.19	3.55	6.34
STM14_0634	-	hypothetical protein	604400	604555	+	156	51	9.45	0	1.07	1.47	7.64	2.74	1.74	0
STM14_986	-	hypothetical protein	915878	916033	-	156	51	5.75	6.76	1.07	0.98	32.46	21.93	19.16	19.54
STM14_1262	-	conserved hypothetical protein	1156832	1156987	+	156	51	0.41	1.5	0.54	0.49	3.82	2.74	8.71	2.66
STM14_1344	-	flagellar basal body P-ring biosynthesis protein FlgA	1216241	1216396	-	156	51	79.75	19.53	1.07	1.96	110.74	63.05	6.1	8.88
STM14_2366	-	putative inner membrane protein	2050620	2050775	+	156	51	2.88	3.76	5.37	2.95	101.19	165.85	52.25	62.18
STM14_2911	-	hypothetical protein	2527947	2528102	-	156	51	2.06	1.5	1.07	3.44	196.65	238.5	174.18	198.97
STM14_3087	-	hypothetical protein	2702529	2702684	-	156	51	0.41	0	1.07	0.49	19.09	26.04	25.26	13.32
STM14_3324	-	hypothetical protein	2917712	2917867	-	156	51	0	0	0	0	3.82	1.37	3.48	0
STM14_3779	-	putative cytoplasmic protein	3305240	3305395	-	156	51	60.84	6.76	6.98	8.84	114.55	8.22	29.61	12.44
STM14_3786	-	hypothetical protein	3310018	3310173	+	156	51	0	0.75	0	0	7.64	1.37	2.61	5.33
STM14_3895	-	hypothetical protein	3402540	3402695	+	156	51	4.93	2.25	11.27	1.47	87.82	10.97	18.29	17.77
STM14_4581	-	hypothetical protein	4011613	4011768	-	156	51	0.41	0.75	1.61	6.87	288.29	209.72	422.39	695.52
STM14_4854	-	hypothetical protein	4262409	4262564	-	156	51	4.52	3	10.73	4.42	13.36	19.19	29.61	27.54
STM14_4943	-	hypothetical protein	4340772	4340927	-	156	51	2.47	0	1.07	0.49	3.82	1.37	2.61	3.55
STM14_5044	-	hypothetical protein	4431313	4431468	+	156	51	1.23	2.25	5.37	1.96	22.91	28.78	29.61	26.65
STM14_5116	-	hypothetical protein	4490568	4490723	+	156	51	0.82	1.5	0	0	1.91	2.74	0.87	0
STM14_5154	-	hypothetical protein	4538728	4538883	-	156	51	0.82	0	1.07	0.49	51.55	35.64	60.96	59.51
STM14_5462	-	conserved hypothetical protein	4818419	4818574	-	156	51	0.41	0	1.61	0.49	5.73	6.85	14.81	1.78
STM14_0068	-	hypothetical protein	68513	68671	-	159	52	10.08	5.89	2.63	0	0	0	1.71	0
STM14_0441	-	hypothetical protein	430751	430909	-	159	52	5.24	2.95	1.58	1.45	18.73	18.83	37.6	24.4
STM14_967	-	conserved hypothetical protein	899158	899316	-	159	52	1.61	0	0	0.96	1.87	1.34	5.13	5.23
STM14_1069	-	hypothetical protein	985102	985260	-	159	52	3.23	0.74	3.69	1.93	18.73	2.69	17.94	9.59
STM14_1137	-	conserved hypothetical protein	1053504	1053662	+	159	52	0	0	0	0	5.62	1.34	2.56	0
STM14_1487	-	hypothetical protein	1337214	1337372	-	159	52	1.61	0	0	0.96	5.62	2.69	6.84	2.61
STM14_2291	-	hypothetical protein	1990827	1990985	-	159	52	1.61	5.89	1.05	2.89	37.46	51.1	69.21	31.37
STM14_2651	-	hypothetical protein	2294185	2294343	-	159	52	0	0	2.11	0.48	3.75	9.41	6.84	5.23
STM14_3272	-	hypothetical protein	2866577	2866735	+	159	52	4.44	5.89	3.16	1.45	13.11	1.34	7.69	8.72
STM14_3619	-	hypothetical protein	3179499	3179657	-	159	52	10.08	8.84	6.32	8.67	280.98	165.41	155.52	123.76
STM14_3718	-	hypothetical protein	3257540	3257698	+	159	52	2.82	7.37	3.16	2.89	479.54	453.21	422.97	483.69
STM14_4089	-	conserved hypothetical protein	3574662	3574820	+	159	52	0	0	0	0	0	0	0	0
STM14_5134	-	hypothetical protein	4521030	4521188	-	159	52	5.24	8.84	6.85	4.34	82.42	68.59	101.68	108.07
STM14_0224	-	hypothetical protein	221426	221587	+	162	53	10.29	10.12	9.82	6.15	40.45	52.8	29.35	28.23
STM14_969	-	hypothetical protein	900254	900415	-	162	53	32.06	2.17	227.4	0.95	62.51	26.4	355.59	65.01
STM14_1761	-	hypothetical protein	1546024	1546185	-	162	53	121.52	256.02	189.15	112.05	106.63	104.27	177.8	104.36
STM14_1771	-	fumarase A	1553745	1553906	+	162	53	94.61	17.36	52.72	91.25	455.95	93.72	129.99	223.25
STM14_1867	-	hypothetical protein	1634718	1634879	-	162	53	2.77	0.72	156.08	2.36	5.52	15.84	106.51	10.26
STM14_2004	-	conserved hypothetical protein	1762419	1762580	-	162	53	32.46	24.59	23.26	9.93	20.22	9.24	10.9	7.7
STM14_2061	-	hypothetical protein	1810467	1810628	-	162	53	1073.13	138.86	341.1	96.92	386.09	88.44	118.25	84.68
STM14_2424	-	putative cytoplasmic protein	2093114	2093275	-	162	53	0.79	0.72	2.58	1.42	1.84	10.56	21.81	4.28
STM14_2986	-	hypothetical protein	2595762	2595923	+	162	53	12.27	5.06	27.39	39.24	80.9	21.12	275.92	418.28
STM14_4023	-	hypothetical protein	3515633	3515794	+	162	53	16.23	225.64	226.37	141.84	7.35	85.8	75.48	85.54
STM14_4088	-	hypothetical protein	3574592	3574753	-	162	53	0	0	0	0	0	0	1.68	0.86
STM14_4388	-	hypothetical protein	3842019	3842180	+	162	53	0.79	0	1.03	2.84	36.77	6.6	41.93	19.67
STM14_4938	-	hypothetical protein	4336017	4336178	+	162	53	2.38	4.34	0.52	0.95	11.03	9.24	9.23	8.55
STM14_1000	-	hypothetical protein	926970	927134	+	165	54	0	0	0	0	0	0	1.65	0
STM14_1260	-	hypothetical protein	1155618	1155782	-	165	54	0.78	0	0.51	0	7.22	1.3	1.65	5.04
STM14_1298	-	hypothetical protein	1183064	1183228	-	165	54	0.78	2.84	5.07	1.86	61.37	80.35	64.23	45.35
STM14_1401	-	conserved hypothetical protein	1269076	1269240	-	165	54	2.33	9.23	3.04	3.71	1.81	10.37	6.59	3.36
STM14_1485	-	isocitrate dehydrogenase, NADP-dependent	1335446	1335610	+	165	54	1.94	6.39	1.01	2.32	28.88	44.06	46.93	26.03
STM14_2128	-	conserved hypothetical protein	1865980	1866144	+	165	54	9.33	4.97	131.93	51.99	3.61	5.18	97.16	40.31
STM14_2701	-	hypothetical protein	2340683	2340847	+	165	54	3.5	1.42	1.01	1.39	23.47	14.26	18.11	21
STM14_3235	-	hypothetical protein	2833834	2833998	-	165	54	58.3	54.67	50.23	17.18	198.56	168.47	245.38	146.97
STM14_3414	-	hypothetical protein	2994186	2994350	+	165	54	114.65	193.14	127.36	111.41	290.62	320.1	307.95	283.02
STM14_3837	-	hypothetical protein	3346625	3346789	+	165	54	5.44	2.13	4.06	3.25	140.8	121.82	145.74	106.66
STM14_0791	-	hypothetical protein	739310	739477	+	168	55	16.41	9.07	18.94	23.71	40.78	19.09	84.91	80.01
STM14_1055	-	hypothetical protein	973986	974153	+	168	55	4.2	1.39	1.99	1.82	17.73	15.27	38.01	14.85
STM14_1751	-	hypothetical protein	1538110	1538277	+	168	55	0	0	0.5	0	7.09	2.55	4.04	4.12
STM14_2498	-	hypothetical protein	2145540	2145707	+	168	55	14.12	22.32	25.91	12.31	959.12	1328.8	1200.92	1596.05
STM14_3588	-	conserved hypothetical protein	3146280	3146447	-	168	55	0	0	0.5	0	0	0	1.62	0
STM14_3670	-	hypothetical protein	3217519	3217686	+	168	55	0.76	0	1	0.91	17.73	6.36	22.64	10.72
STM14_3693	-	hypothetical protein	3237457	3237624	+	168	55	95.04	62.07	86.71	36.02	1654.08	740.77	692.25	1048.36
STM14_4325	-	hypothetical protein	3781138	3781305	+	168	55	0.38	0	2.49	0.91	14.18	19.09	334.8	24.74
STM14_4909	-	hypothetical protein	4305795	4305962	-	168	55	16.8	9.07	8.47	18.24	251.75	94.19	295.99	239.2
STM14_5101	-	hypothetical protein	4478537	4478704	+	168	55	2.67	4.88	1.5	2.74	19.5	16.55	12.13	17.32
STM14_5208	-	hypothetical protein	4589666	4589833	-	168	55	9.54	6.97	14.45	10.03	2175.3	2250.3	1726.58	1359.32
STM14_0645	-	conserved hypothetical protein	614019	614189	+	171	56	1.5	0	0.49	0	3.48	1.25	6.36	3.24
STM14_1316	-	hypothetical protein	1194339	1194509	-	171	56	1.5	0	1.47	1.79	73.15	17.51	65.94	33.22
STM14_1494	-	hypothetical protein	1340405	1340575	-	171	56	0.38	1.37	4.41	2.69	36.58	65.02	212.14	80.23
STM14_1790	-	hypothetical protein	1569946	1570116	+	171	56	153	84.27	43.58	81.52	196.82	65.02	127.92	133.71
STM14_2071	-	hypothetical protein	1818504	1818674	-	171	56	36	55.5	62.18	41.21	114.96	90.03	194.66	188.81
STM14_2263	-	hypothetical protein	1973981	1974151	-	171	56	4.5	8.91	16.16	0.9	6.97	5	54.03	9.72
STM14_2619	-	conserved hypothetical protein	2259828	2259998	-	171	56	0.75	0.69	1.96	0.9	10.45	8.75	34.96	31.6
STM14_2902	-	conserved hypothetical protein	2517875	2518045	+	171	56	0.38	0	0.49	0.9	148.05	10	13.51	24.31
STM14_3340	-	hypothetical protein	2935806	2935976	+	171	56	8.25	0	6.37	0.45	8.71	6.25	12.71	6.48
STM14_3631	-	hypothetical protein	3185172	3185342	+	171	56	55.13	5.48	15.18	3.14	155.02	18.76	58.79	37.28
STM14_3645	-	hypothetical protein	3199028	3199198	-	171	56	6	3.43	4.9	1.34	0	5	3.97	1.62
STM14_5344	-	hypothetical protein	4707729	4707899	+	171	56	0	0	0	0	12.19	3.75	7.15	0.81
STM14_0430	-	hypothetical protein	418467	418640	+	174	57	0.74	0.67	0.96	0	0	2.46	2.34	0
STM14_927	-	putative cytoplasmic protein	867104	867277	+	174	57	3.32	2.02	3.37	0.44	10.27	1.23	9.37	5.57
STM14_1559	-	hypothetical protein	1373854	1374027	-	174	57	2.95	2.69	4.81	0.44	143.79	6.14	57	22.3
STM14_1783	-	hypothetical protein	1563914	1564087	-	174	57	4.42	2.02	5.77	2.2	32.52	22.12	20.3	12.74
STM14_2252	-	putative cytoplasmic protein	1967603	1967776	+	174	57	110.93	24.24	198.24	37.42	10.27	7.37	81.21	21.5
STM14_2493	-	hypothetical protein	2142163	2142336	+	174	57	7	7.41	4.33	2.64	6.85	9.83	15.62	12.74
STM14_4259	-	hypothetical protein	3722125	3722298	-	174	57	41.28	20.87	45.71	20.69	249.91	165.9	248.3	274.75
STM14_4378	-	hypothetical protein	3832781	3832954	-	174	57	16.95	29.63	17.32	1.76	6.85	13.52	6.25	2.39
STM14_4504	-	hypothetical protein	3946552	3946725	+	174	57	0	0.67	2.41	0.88	3.42	1.23	3.9	3.19
STM14_4582	-	hypothetical protein	4011777	4011950	+	174	57	2.21	0.67	0.96	0	22.25	40.55	43.73	46.19
STM14_4977	-	putative cytoplasmic protein	4373434	4373607	-	174	57	2.21	2.02	2.89	1.32	8.56	4.92	73.4	3.98
STM14_5042	-	putative Na+-dependent transporter	4430254	4430427	-	174	57	3.69	2.02	6.74	2.2	32.52	34.41	40.6	31.86
STM14_5152	-	hypothetical protein	4537849	4538022	+	174	57	54.54	84.17	11.55	28.17	641.9	492.79	503.63	410.14
STM14_1339	-	hypothetical protein	1212983	1213159	-	177	58	1.81	2.65	2.84	0.87	52.16	60.4	69.85	36.01
STM14_2074	-	hypothetical protein	1820225	1820401	-	177	58	36.59	17.87	35.48	25.53	491.35	221.08	499.7	380.48
STM14_2260	-	hypothetical protein	1973190	1973366	-	177	58	0.72	1.32	14.19	0	10.1	0	100.55	3.91
STM14_3386	-	hypothetical protein	2971817	2971993	+	177	58	1.81	0.66	2.37	0.87	38.7	13.29	25.33	22.7
STM14_4093	-	hypothetical protein	3579746	3579922	+	177	58	11.96	6.62	10.88	3.89	55.53	50.74	37.61	39.93
STM14_4182	-	conserved hypothetical protein	3637245	3637421	-	177	58	5.8	3.97	26.49	48.03	3.37	2.42	7.68	37.58
STM14_4416	-	hypothetical protein	3861562	3861738	-	177	58	0	0	0	0	10.1	0	1.54	9.39
STM14_4578	-	hypothetical protein	4011296	4011472	+	177	58	310.85	55.6	116.36	102.56	659.62	157.05	752.23	566.03
STM14_4601	-	hypothetical protein	4024130	4024306	+	177	58	1.81	0.66	4.73	0	57.21	13.29	56.03	18.79
STM14_5083	-	hypothetical protein	4462681	4462857	-	177	58	73.55	4.63	6.62	3.03	79.09	19.33	12.28	39.14
STM14_5215	ecnA	putative entericidin A precursor	4593026	4593202	+	177	58	14.85	30.45	14.19	16.88	178.37	280.27	105.16	119.78
STM14_1581	-	conserved hypothetical protein	1391859	1392038	+	180	59	0.71	0	0.47	0	3.31	0	2.26	0.77
STM14_2051	-	hypothetical protein	1802254	1802433	+	180	59	0.71	0	0.47	1.7	0	0	2.26	2.31
STM14_3208	-	putative bacteriophage protein	2816704	2816883	-	180	59	7.84	6.51	2.79	4.26	9.93	16.63	13.59	9.24
STM14_3236	-	hypothetical protein	2833998	2834177	-	180	59	0	1.3	2.79	0.43	89.35	84.34	88.31	53.12
STM14_3379	-	hypothetical protein	2968355	2968534	+	180	59	3.21	0.65	1.86	0	43.02	9.5	3.77	6.16
STM14_5291	-	hypothetical protein	4655902	4656081	-	180	59	8.91	5.86	3.26	0.43	79.42	8.32	36.98	13.86
STM14_5481	-	hypothetical protein	4829440	4829619	+	180	59	3997.57	148.4	2581.03	309.35	1654.67	68.9	828	227.1
STM14_0173	-	hypothetical protein	168890	169072	-	183	60	0	0	1.83	0	3.26	2.34	16.33	6.81
STM14_0726	-	conserved hypothetical protein	688331	688513	+	183	60	0.35	0	0	0	0	0	0	0.76
STM14_1245	-	hypothetical protein	1143361	1143543	+	183	60	5.96	6.4	1.83	3.77	843.07	200.98	469.21	249.13
STM14_1897	-	hypothetical protein	1664885	1665067	-	183	60	3.85	5.12	5.03	2.93	16.28	4.67	5.2	3.03
STM14_2117	-	hypothetical protein	1858398	1858580	+	183	60	475.87	254.81	202.68	114.26	182.29	122.69	400.16	568.67
STM14_3080	-	hypothetical protein	2685675	2685857	+	183	60	2.8	3.2	0	6.7	481.75	413.64	311.81	258.97
STM14_3343	-	hypothetical protein	2936325	2936507	+	183	60	0.7	0.64	0.46	0	9.77	1.17	11.14	5.3
STM14_3616	-	hypothetical protein	3177651	3177833	+	183	60	3.85	3.2	1.37	2.93	91.14	86.47	72.01	76.48
STM14_4501	-	hypothetical protein	3943928	3944110	+	183	60	26.63	13.44	13.27	4.6	13.02	2.34	23.76	9.09
STM14_4800	-	hypothetical protein	4215049	4215231	-	183	60	0.35	0.64	0.46	0	30.92	167.09	45.29	66.64
STM14_0665	-	conserved hypothetical protein	627603	627788	+	186	61	0.34	0.63	0.9	0.41	46.44	29.89	44.56	20.86
STM14_1538	-	hypothetical protein	1362921	1363106	+	186	61	1.72	0.63	1.35	2.06	328.27	29.89	214.75	155.71
STM14_1617	-	hypothetical protein	1421769	1421954	+	186	61	1.72	1.26	29.71	2.88	3.2	1.15	27.03	5.22
STM14_2649	-	hypothetical protein	2293497	2293682	-	186	61	2.07	1.26	1.8	2.88	204.97	109.21	143.9	146.02
STM14_3583	-	hypothetical protein	3143293	3143478	-	186	61	5.52	4.41	6.3	4.12	401.92	306.95	160.7	251.07
STM14_3662	-	conserved hypothetical protein	3213534	3213719	-	186	61	0	0.63	0.45	0.41	0	0	2.19	2.24
STM14_4696	-	hypothetical protein	4122161	4122346	+	186	61	0.34	0.63	3.15	0.82	3.2	4.6	4.38	4.47
STM14_4753	-	hypothetical protein	4171444	4171629	-	186	61	16.89	13.86	8.55	9.06	174.54	142.55	124.18	136.34
STM14_5303	-	hypothetical protein	4669323	4669508	-	186	61	13.45	15.12	17.56	17.71	240.19	151.75	108.11	113.24
STM14_0079	-	hypothetical protein	80354	80542	+	189	62	4.75	1.24	10.63	16.62	1416.71	345.07	4267.8	2890.94
STM14_1065	-	hypothetical protein	983350	983538	+	189	62	4.75	1.24	12.4	16.62	1330.04	314.52	4250.55	2888.74
STM14_1445	-	conserved hypothetical protein	1300693	1300881	+	189	62	16.63	6.82	29.68	64.44	6106.53	3045.65	17941.7	13520.6
STM14_2198	-	hypothetical protein	1926390	1926578	-	189	62	2.71	2.48	7.97	17.83	1400.96	315.65	4290.8	3001.65
STM14_2376	-	hypothetical protein	2057555	2057743	-	189	62	2.71	3.1	11.96	17.43	1344.22	337.15	4221.79	3129.22
STM14_3030	-	hypothetical protein	2631298	2631486	-	189	62	2.04	1.86	13.29	14.59	1382.04	330.36	4290.08	3129.96
STM14_3980	-	hypothetical protein	3478331	3478519	-	189	62	3.39	3.1	10.19	12.56	1429.32	293.03	4249.83	2917.33
STM14_4190	-	hypothetical protein	3649470	3649658	-	189	62	4.07	0	8.42	19.05	1367.86	343.94	4355.5	2998.72
STM14_4658	-	hypothetical protein	4086316	4086504	+	189	62	0	0.62	0.44	1.62	7.88	20.36	20.85	23.46
STM14_4961	-	hypothetical protein	4358974	4359162	-	189	62	2.04	1.86	0.89	0.41	91.4	40.73	40.26	27.86
STM14_4999	-	putative cytoplasmic protein	4390264	4390452	+	189	62	1.7	0.62	7.53	3.65	36.25	33.94	113.58	101.91
STM14_0897	-	hypothetical protein	837473	837664	-	192	63	1.67	0.61	0.87	0	248.2	138.1	116.05	98.15
STM14_1034	-	conserved hypothetical protein	955378	955569	+	192	63	1	0.61	0.87	0.4	0	1.11	0.71	1.44
STM14_1198	-	MsgA-like protein	1101868	1102059	-	192	63	1	0.61	1.31	0	7.76	7.8	18.4	6.5
STM14_1634	ydiE	hypothetical protein	1435026	1435217	-	192	63	306.6	43.32	221.96	171.14	96.18	18.93	174.07	124.86
STM14_1796	-	hypothetical protein	1572462	1572653	-	192	63	9.02	3.05	0.44	3.19	27.92	10.02	26.89	24.54
STM14_4069	-	hypothetical protein	3558566	3558757	+	192	63	7.01	4.88	4.36	5.19	232.69	364.18	197.42	142.18
STM14_4135	rpmC	50S ribosomal protein L29	3605686	3605877	-	192	63	2905.73	7771.61	3187.63	5199.54	4158.91	11256.1	4000.86	7021.68
STM14_4148	-	elongation factor Tu	3611988	3612179	-	192	63	304.93	743.84	262.07	627.1	1915.8	4395.75	1842.63	3035.58
STM14_4354	-	hypothetical protein	3807400	3807591	-	192	63	13.36	9.15	15.7	3.99	88.42	52.34	48.12	25.26
STM14_5115	-	hypothetical protein	4490374	4490565	-	192	63	6.01	5.49	5.23	5.58	127.2	222.74	118.17	148.68
STM14_5399	-	hypothetical protein	4766523	4766714	+	192	63	19.04	4.88	8.29	5.19	1473.69	301.81	582.37	510.26
STM14_0099	-	putative inner membrane protein	95983	96177	+	195	64	14.14	7.81	10.3	7.86	97.75	47.15	87.79	70.35
STM14_3794	-	hypothetical protein	3314216	3314410	+	195	64	36.5	7.21	6.01	2.75	39.71	10.97	16.72	14.92
STM14_4366	-	hypothetical protein	3822083	3822277	-	195	64	0.99	0.6	4.72	5.5	702.6	369.54	936.4	826.45
STM14_0826	-	K+-transporting ATPase, F subunit	774532	774729	-	198	65	1.62	1.18	10.57	0.39	0	0	6.86	2.1
STM14_2680	-	conserved hypothetical protein	2322009	2322206	+	198	65	586.85	43.79	383.95	56.48	124.85	12.96	62.44	32.89
STM14_3353	-	hypothetical protein	2949636	2949833	+	198	65	4.21	5.92	60.04	10.06	60.17	39.96	1077.98	80.48
STM14_3801	-	hypothetical protein	3320290	3320487	+	198	65	0.32	0	0	0.77	4.51	1.08	8.23	2.1
STM14_5272	-	hypothetical protein	4642797	4642994	-	198	65	2.27	0	3.38	2.32	9.03	3.24	19.21	10.5
STM14_1038	-	hypothetical protein	958765	958965	-	201	66	1.28	1.17	1.25	1.91	22.23	10.64	39.2	22.06
STM14_1159	-	hypothetical protein	1068921	1069121	+	201	66	0.96	0	0.83	0	0	2.13	4.06	0.69
STM14_2255	-	hypothetical protein	1970094	1970294	-	201	66	1.28	0	2.5	0.38	13.34	7.45	49.34	11.03
STM14_3032	-	conserved hypothetical protein	2633812	2634012	+	201	66	0.96	0.58	0.42	1.52	210.41	41.49	84.49	91.69
STM14_3206	-	hypothetical protein	2815861	2816061	-	201	66	1.28	0	0.42	0.38	25.19	15.96	31.77	21.37
STM14_3239	-	putative methyltransferase	2836525	2836725	-	201	66	36.69	26.81	37.49	3.43	32.6	29.79	31.09	22.06
STM14_3830	-	hypothetical protein	3342234	3342434	+	201	66	82.31	43.72	68.31	35.44	11.85	11.7	13.52	12.41
STM14_0262	-	hypothetical protein	259830	260033	+	204	67	0.94	0	2.46	6.01	378.14	379.44	543.45	677.23
STM14_0292	-	hypothetical protein	289616	289819	-	204	67	587.51	1086.6	675.54	426.89	16895.2	36585.7	15389.7	14891
STM14_1053	-	hypothetical protein	972908	973111	+	204	67	9.43	9.19	18.47	13.14	18.98	7.34	25.31	17.66
STM14_1209	-	hypothetical protein	1115818	1116021	-	204	67	117.25	10.91	294.27	41.3	214.62	32.49	265.73	117.51
STM14_1327	-	conserved hypothetical protein	1204177	1204380	+	204	67	0.31	0.57	1.23	0.38	4.38	4.19	5.99	1.36
STM14_3449	-	hypothetical protein	3019869	3020072	+	204	67	0.94	1.15	0	0	1.46	0	1.33	0.68
STM14_4995	-	hypothetical protein	4388644	4388847	+	204	67	0.31	1.15	0.82	0.75	5.84	8.39	6.66	6.11
STM14_0232	-	hypothetical protein	230459	230665	+	207	68	0.93	1.7	2.43	1.11	10.07	3.1	11.81	10.71
STM14_0575	-	hypothetical protein	547392	547598	+	207	68	3.41	2.83	0.81	3.7	246.04	358.45	177.21	259.74
STM14_0714	-	hypothetical protein	678228	678434	+	207	68	400.87	277.9	945.23	179.46	175.54	118.79	317.67	125.85
STM14_1591	-	hypothetical protein	1400923	1401129	-	207	68	0.31	0	0	0.37	50.36	17.56	22.32	23.43
STM14_1615	-	hypothetical protein	1419534	1419740	+	207	68	0.62	0.57	1.62	2.59	83.45	167.34	99.76	101.75
STM14_2200	-	hypothetical protein	1928329	1928535	+	207	68	26.02	6.23	7.68	3.7	73.38	82.64	30.85	58.91
STM14_3415	-	hypothetical protein	2994269	2994475	-	207	68	4.96	3.4	4.04	3.7	463.31	480.34	389.87	377.56
STM14_5274	-	putative cytoplasmic protein	4643067	4643273	+	207	68	0.31	1.13	0.4	0.37	12.95	91.94	59.07	56.23
STM14_0089	-	conserved hypothetical protein	89119	89328	+	210	69	0	0	0	0	0	0	1.29	0
STM14_0337	-	hypothetical protein	330303	330512	+	210	69	0.92	0	0.4	0	1.42	2.04	3.23	2.64
STM14_1996	-	hypothetical protein	1755685	1755894	-	210	69	1.53	1.12	2.39	0.73	34.04	31.57	161.09	65.99
STM14_4997	-	hypothetical protein	4389931	4390140	+	210	69	3.66	5.58	31.5	13.13	7.09	30.55	130.69	63.35
STM14_1913	-	hypothetical protein	1680178	1680390	+	213	70	2.41	0	1.18	1.44	1.4	0	5.74	1.95
STM14_2059	-	conserved domain protein	1809302	1809514	+	213	70	106.88	62.16	213.83	93.49	141.23	94.37	179.87	126.86
STM14_2419	-	putative cold-shock protein	2090431	2090643	-	213	70	12.64	6.05	7.08	12.59	43.35	21.08	38.91	53.35
STM14_5410	-	hypothetical protein	4773638	4773850	+	213	70	0.9	2.75	3.14	0.36	6.99	7.03	10.21	7.16
STM14_0053	yaaY	putative cytoplasmic protein	52649	52864	+	216	71	0	1.08	0.39	0.71	53.78	119.78	70.45	48.12
STM14_0359	-	putative cytoplasmic protein	350359	350574	+	216	71	4.45	2.71	46.9	2.84	22.06	11.88	654.78	20.53
STM14_0487	-	hypothetical protein	467631	467846	+	216	71	1.48	2.71	4.26	2.84	66.19	68.31	101.27	73.13
STM14_1827	-	hypothetical protein	1601704	1601919	-	216	71	0.59	1.08	1.55	1.42	15.17	3.96	11.95	11.55
STM14_1872	-	putative phage-related secreted protein	1637216	1637431	+	216	71	1.19	0	0	0	4.14	5.94	8.18	3.21
STM14_2411	-	hypothetical protein	2084253	2084468	+	216	71	5.05	2.71	4.26	0.71	2.76	4.95	1.26	3.85
STM14_5186	-	putative cytoplasmic protein	4573190	4573405	-	216	71	18.41	0	0.78	0.71	93.76	0.99	8.18	10.26
STM14_0280	yaeP	hypothetical protein	280998	281216	-	219	72	317.12	204.9	829.21	210.19	216.24	139.62	346.17	160.08
STM14_2409	-	putative cytoplasmic protein	2083025	2083243	-	219	72	561.33	56.17	454.18	80.44	735.76	90.8	437.99	204.38
STM14_0573	-	hypothetical protein	546597	546818	-	222	73	469.39	298.18	249.29	101.78	292.47	394.91	191.55	190.38
STM14_1135	-	hypothetical protein	1051897	1052118	-	222	73	1.44	0.53	1.89	0	14.76	7.71	11.63	11.24
STM14_1810	-	putative dimethyl sulphoxide reductase subunit A	1586812	1587033	-	222	73	0.29	0.53	1.51	0.69	4.02	2.89	6.12	4.37
STM14_2427	-	hypothetical protein	2093906	2094127	-	222	73	32.93	23.22	50.91	77.28	50.98	25.04	57.53	49.94
STM14_5190	-	putative cytoplasmic protein	4574852	4575073	-	222	73	59.5	17.94	25.27	5.52	20.12	7.71	15.91	9.36
STM14_5288	-	hypothetical protein	4654346	4654567	-	222	73	60.37	13.72	35.83	12.77	118.06	20.23	43.45	42.45
STM14_0406	-	putative inner membrane protein	392401	392625	+	225	74	2.57	3.12	1.49	0.68	9.27	3.8	6.64	8.01
STM14_0424	-	putative cytoplasmic protein	411886	412110	+	225	74	51.3	3.12	26.42	7.15	92.66	14.26	64.01	22.79
STM14_1361	-	conserved hypothetical protein	1232358	1232582	+	225	74	6.84	6.77	10.42	5.45	52.95	19.01	65.82	36.34
STM14_1528	-	hypothetical protein	1358977	1359201	+	225	74	17.96	7.29	17.86	24.51	736	144.45	547.07	193.38
STM14_3301	-	hypothetical protein	2898012	2898236	-	225	74	51166.3	10857.4	27960.9	23728.1	78031.6	59625.1	120015	103310
STM14_4813	-	putative cytoplasmic protein	4223708	4223932	+	225	74	48.45	72.38	15.63	52.08	8135.69	5724.92	3885.66	3117.55
STM14_0925	-	hypothetical protein	864550	864777	+	228	75	0.28	2.57	2.2	0.34	40.5	35.64	36.35	26.74
STM14_1273	-	hypothetical protein	1164294	1164521	+	228	75	1.13	0	0	0	139.78	9.38	43.5	23.7
STM14_1661	ydiH	putative cytoplasmic protein	1460003	1460230	+	228	75	222.19	116.13	379.7	225.75	108.42	68.46	218.69	197.53
STM14_2298	-	hypothetical protein	1996367	1996594	+	228	75	41.91	3.6	3.3	7.73	80.99	50.64	64.95	62.6
STM14_2753	yejL	hypothetical protein	2380214	2380441	+	228	75	476.73	634.62	362.07	468.29	197.25	175.38	222.27	244.32
STM14_2981	-	putative cytoplasmic protein	2590333	2590560	-	228	75	43.31	48.82	40.03	25.87	101.89	109.73	88.19	64.42
STM14_3341	-	hypothetical protein	2936002	2936229	-	228	75	6.19	2.06	1.84	1.34	73.15	47.83	11.92	6.69
STM14_4285	yhhV	putative cytoplasmic protein	3741999	3742226	-	228	75	46.69	61.66	44.07	34.27	27.43	37.51	19.66	14.59
STM14_5306	-	hypothetical protein	4671075	4671302	+	228	75	0.56	0	0.73	0.67	73.15	35.64	54.23	32.82
STM14_1760	ydgT	oriC-binding nucleoid-associated protein	1545511	1545741	-	231	76	401.14	982.93	1221.79	601.47	131.51	174.03	426.41	242.95
STM14_1937	-	putative inner membrane protein	1700960	1701190	-	231	76	2.78	0.51	51.47	5.31	9.03	6.48	141.74	21
STM14_2736	-	hypothetical protein	2364975	2365205	-	231	76	138.8	90.28	166.72	26.53	956.7	512.82	572.86	545.89
STM14_2805	-	hypothetical protein	2427980	2428210	+	231	76	0.83	2.54	2.54	0	37.39	16.66	18.82	19.2
STM14_4220	-	hypothetical protein	3677538	3677768	+	231	76	5.27	4.06	8.7	7.63	130.22	41.66	236.44	248.35
STM14_5247	-	hypothetical protein	4621703	4621933	+	231	76	52.74	73.54	76.84	28.52	175.35	308.25	224.08	356.93
STM14_2706	-	hypothetical protein	2342834	2343067	+	234	77	176.76	78.61	735.27	59.9	138.74	62.14	339.07	86.46
STM14_3146	-	putative periplasmic protein	2763716	2763949	+	234	77	4.11	3	2.15	2.29	14	23.76	34.84	26.06
STM14_4415	-	hypothetical protein	3861460	3861693	+	234	77	9.59	1.5	3.94	2.95	15.27	9.14	6.97	4.74
STM14_3072	-	putative inner membrane protein	2673033	2673269	-	237	78	16.78	4.94	8.48	6.14	60.32	18.04	37.26	25.73
STM14_3680	-	conserved hypothetical protein	3225806	3226042	+	237	78	7.58	11.37	9.54	4.52	65.35	43.31	38.98	43.85
STM14_5196	-	hypothetical protein	4579152	4579388	-	237	78	5.41	6.43	5.3	2.91	26.39	54.13	38.98	38
STM14_1670	lppB	putative methyl-accepting chemotaxis protein	1469033	1469272	-	240	79	6.95	35.15	8.72	12.77	44.68	49	63.97	35.22
STM14_1603	cedA	cell division modulator	1409707	1409949	+	243	80	79.96	101.73	85.79	69.97	56.38	57.2	96.72	76.41
STM14_2425	-	hypothetical protein	2093253	2093495	-	243	80	4.75	1.45	5.86	2.84	34.32	14.96	33.55	19.39
STM14_2483	-	hypothetical protein	2132377	2132619	+	243	80	5.01	1.93	6.2	7.56	11.03	6.16	18.45	39.92
STM14_4263	-	putative inner membrane protein	3723698	3723940	+	243	80	3.43	3.86	2.07	1.89	18.39	25.52	27.4	23.95
STM14_2614	-	hypothetical protein	2254277	2254522	+	246	81	0.26	0	0	0.31	14.53	13.04	17.12	11.83
STM14_2692	-	putative inner membrane protein	2332496	2332741	+	246	81	57.61	50.96	45.27	49.51	44.8	19.99	50.26	39.43
STM14_5396	-	molybdopterin-guanine dinucleotide biosynthesis protein A	4764865	4765110	-	246	81	1.3	1.43	1.02	0	20.58	2.61	11.05	9.01
STM14_0679	ybdJ	putative inner membrane protein	640057	640305	-	249	82	79.06	78.58	49.43	50.14	82.53	37.79	49.11	33.39
STM14_1167	-	hypothetical protein	1073337	1073585	+	249	82	0.77	0.47	1.01	3.38	0	0.86	1.09	0
STM14_1279	-	hypothetical protein	1170030	1170278	-	249	82	3.86	0.94	1.68	0.31	35.88	18.89	22.92	11.69
STM14_1529	-	putative cytoplasmic protein	1359269	1359517	-	249	82	876.14	82.81	561.19	138.73	678.22	48.95	550.54	89.6
STM14_1602	-	hypothetical protein	1409399	1409647	-	249	82	10.56	5.65	8.74	4.31	796.63	275.66	906.29	680.06
STM14_1704	ssaI	type III secretion system apparatus protein	1500008	1500256	+	249	82	2.06	0.94	9.75	67.06	3.59	0	25.1	50.64
STM14_0906	-	hypothetical protein	845597	845848	+	252	83	535.15	537.91	499.36	335.85	160.74	187.52	257.71	181.46
STM14_3704	-	conserved hypothetical protein	3245634	3245885	+	252	83	7.89	4.18	6.64	3.65	108.74	46.67	78.17	42.34
STM14_4456	-	hypothetical protein	3904878	3905129	+	252	83	0.51	0.93	0	0	1.18	0.85	2.7	1.1
STM14_0611	ybbV	putative cytoplasmic protein	583099	583353	+	255	84	0.25	0.46	0.98	0.3	1.17	0	1.6	0.54
STM14_0659	-	hypothetical protein	622266	622520	-	255	84	2.01	0.46	1.97	0	24.53	24.32	35.16	26.63
STM14_1108	-	hypothetical protein	1023127	1023381	-	255	84	46.27	80.86	39.73	12.01	45.55	91.4	44.75	34.24
STM14_2020	-	putative outer membrane lipoprotein	1776945	1777199	-	255	84	38.22	18.84	65.01	19.52	24.53	10.06	76.72	11.41
STM14_2814	yfaE	2Fe-2S ferredoxin YfaE	2436481	2436735	+	255	84	71.67	51.46	46.29	38.45	302.51	259.11	182.22	240.73
STM14_1081	-	hypothetical protein	994689	994946	-	258	85	8.95	14.99	59.71	9.8	327.86	121.83	362.3	295.4
STM14_2842	pmrD	polymyxin resistance protein B	2462871	2463128	-	258	85	187.16	107.62	1786.12	179.9	197.41	106.09	1128.5	137.5
STM14_3070	-	putative inner membrane protein	2672655	2672915	-	261	86	132.43	55.21	119.33	35.8	191.71	32.77	194.68	124.24
STM14_3216	-	conserved hypothetical protein	2820999	2821259	-	261	86	11.3	8.08	6.74	7.63	10.27	4.92	16.66	14.33
STM14_3479	-	putative cytoplasmic protein	3044345	3044605	-	261	86	164.62	134.67	198.89	73.66	215.68	155.66	135.86	147.6
STM14_4367	-	hypothetical protein	3822117	3822377	+	261	86	1.97	1.35	1.28	1.47	36.52	63.08	34.36	19.11
STM14_1911	-	hypothetical protein	1679194	1679457	-	264	87	1.7	1.33	6.34	2.03	32.72	21.87	278.41	26.24
STM14_2556	-	hypothetical protein	2192950	2193219	-	270	89	12.83	0.43	0.62	1.7	5.52	3.17	2.52	4.62
STM14_5185	-	hypothetical protein	4572913	4573182	-	270	89	18.53	1.3	4.65	1.13	71.7	1.58	17.61	5.65
STM14_1508	-	putative cytoplasmic protein	1345067	1345339	+	273	90	5.64	1.29	23.31	8.98	28.37	10.18	56.73	26.9
STM14_3884	-	hypothetical protein	3390891	3391163	+	273	90	26.31	23.17	26.68	12.63	98.19	104.17	147.81	136.54
STM14_5150	-	hypothetical protein	4536377	4536649	+	273	90	58.96	72.1	31.59	7.58	127.65	162.13	63.2	65.48
STM14_0076	-	hypothetical protein	74964	75239	-	276	91	1.39	1.27	0.61	0.28	20.5	12.4	5.91	9.04
STM14_0346	-	hypothetical protein	340013	340288	-	276	91	0	0	0.61	0.28	1.08	0.77	0.98	0
STM14_1082	-	hypothetical protein	994867	995142	-	276	91	199.58	142.63	329.44	116	517.98	233.2	535.57	494.54
STM14_2674	-	hypothetical protein	2317916	2318191	-	276	91	1.63	4.24	2.73	2.5	97.12	82.9	85.65	66.27
STM14_3563	-	putative transcriptional regulator	3122250	3122525	-	276	91	132.67	144.75	196.27	85.75	74.46	94.52	167.37	52.72
STM14_0811	ybfE	LexA regulated protein	758318	758599	-	282	93	43.66	89.74	40.97	37.75	57.03	94.78	94.91	87.96
STM14_0924	-	hypothetical protein	864209	864493	+	285	94	0.68	0.82	0.59	0.81	3.14	10.5	13.82	11.18
STM14_0774	-	hypothetical protein	730309	730596	+	288	95	7.35	1.63	9.88	10.37	395.05	20.79	116.52	170.33
STM14_2273	-	hypothetical protein	1977499	1977786	-	288	95	0	0.41	0	0	4.14	2.97	8.02	4.33
STM14_4402	-	putative cytoplasmic protein	3851900	3852187	-	288	95	162.32	209.91	175.3	136.17	92.04	79.44	98.59	67.36
STM14_5187	-	putative regulatory protein	4573428	4573715	-	288	95	104.87	0.81	1.16	6.12	114.79	0.74	0.47	6.74
STM14_0801	-	hypothetical protein	749864	750154	+	291	96	7.49	1.61	1.15	1.05	246.67	23.51	81.7	102.38
STM14_1155	-	hypothetical protein	1067082	1067372	+	291	96	553.12	456.56	494.58	286.89	178.09	169.01	190.95	157.14
STM14_2745	-	bicyclomycin/multidrug efflux system	2373810	2374100	-	291	96	197.89	79.72	231.9	73.7	77.79	38.21	114.85	48.1
STM14_2757	-	virulence protein	2383045	2383335	+	291	96	0	0	0.29	0	2.05	1.47	2.8	0.95
STM14_3505	-	putative ABC-type transporter	3067569	3067859	+	291	96	235.79	199.29	219.81	117.13	85.97	88.18	122.79	68.57
STM14_3562	-	hypothetical protein	3121988	3122278	-	291	96	17.41	15.7	26.47	10.53	81.88	52.17	105.98	46.19
STM14_4130	rpsN	30S ribosomal subunit protein S14	3603698	3603988	-	291	96	4111.8	9545.92	4556.5	7635.86	5367.28	12938.5	4622.12	8085.72
STM14_5046	-	putative inner membrane protein	4432382	4432672	-	291	96	0.88	5.23	1.44	0.26	1.02	0.73	0.93	1.43
STM14_1794	-	hypothetical protein	1571734	1572027	-	294	97	5.67	2.79	7.12	6.77	15.2	6.55	38.82	117.36
STM14_3983	yhbY	RNA-binding protein YhbY	3481376	3481669	+	294	97	689.69	1827.14	807.06	938.65	560.22	669.85	506.94	532.13
STM14_3995	yrbA	putative transcriptional regulator	3490104	3490397	-	294	97	431.22	530.41	318.1	288.4	238.07	303.29	165.44	162.14
STM14_3541	ygbF	hypothetical protein	3098420	3098716	-	297	98	5.18	1.97	7.33	2.58	24.07	10.08	25.62	19.13
STM14_1145	-	hypothetical protein	1062627	1062926	-	300	99	9.62	0.78	3.35	1.28	9.93	4.28	4.08	6.47
STM14_1175	-	ATP-binding sugar transporter-like protein	1081513	1081812	+	300	99	2.14	2.73	1.4	1.53	3.97	3.56	5.89	5.08
STM14_1994	-	hypothetical protein	1751742	1752041	+	300	99	195.16	62.09	181.4	66.89	133.04	58.45	91.03	79.91
STM14_2052	ycjE	putative cytoplasmic protein	1802408	1802707	+	300	99	1.71	0.78	2.79	4.85	47.65	27.09	42.12	40.65
STM14_3374	-	putative regulatory protein	2966276	2966575	+	300	99	20.31	19.53	12.56	12.51	12.91	19.96	16.3	18.94
STM14_4409	-	putative outer membrane lipoprotein	3856590	3856892	-	303	100	93.76	21.27	64.38	24.52	70.77	7.76	52.46	19.67
STM14_5313	-	putative cytoplasmic protein	4678291	4678593	-	303	100	0.63	0	0	0.25	15.73	4.23	2.24	3.2
STM14_5333	-	putative cytoplasmic protein	4697485	4697787	+	303	100	11.85	0.39	8.57	3.29	28.51	5.65	8.52	10.52
STM14_1776	-	outer membrane protein	1559385	1559690	-	306	101	13.83	1.15	1.92	3.5	3.89	3.49	8.44	9.96
STM14_0348	-	putative cytoplasmic protein	340729	341037	+	309	102	8.92	15.55	8.13	3.72	3.86	4.15	5.72	3.14
STM14_0498	-	hypothetical protein	473976	474284	-	309	102	29.47	13.65	15.44	11.9	174.46	119.72	152.57	137.67
STM14_3056	-	hypothetical protein	2657883	2658191	-	309	102	2.7	3.79	1.63	0	23.13	20.07	22.42	18.83
STM14_1543	-	putative periplasmic protein	1364115	1364426	+	312	103	49.94	65.71	194.55	80.28	90.69	82.93	357.51	123.47
STM14_2849	elaB	hypothetical protein	2470331	2470642	-	312	103	2303.82	79.98	1222.05	260.96	668.23	47.29	489.02	155.89
STM14_4847	-	hypothetical protein	4255220	4255531	+	312	103	4.32	4.51	3.76	1.72	30.55	19.19	24.82	24.87
STM14_1163	-	hypothetical protein	1070732	1071049	+	318	105	85.1	109.05	126.38	107.18	113.33	112.29	124.33	107.2
STM14_2772	-	virulence protein	2396453	2396770	+	318	105	0.6	0	1.58	0	4.68	4.03	30.76	17.87
STM14_4703	-	putative cytoplasmic protein	4129359	4129676	+	318	105	13.91	23.58	16.06	9.88	18.73	26.9	30.76	22.66
STM14_1063	clpS	ATP-dependent Clp protease adaptor protein ClpS	980676	980996	+	321	106	94.89	105.48	154.67	84.71	393.41	184.52	333.1	227.5
STM14_1235	-	putative inner membrane protein	1135887	1136207	+	321	106	5.59	1.09	1.04	1.91	45.46	2	7.62	19.86
STM14_4992	-	putative inner membrane protein	4387859	4388182	+	324	107	6.14	12.29	8.01	4.49	49.64	44.88	31.87	43.2
STM14_0130	-	hypothetical protein	129166	129492	-	327	108	28.24	11.82	11.78	4.45	351.58	75.85	129.63	153.4
STM14_1097	-	putative cytoplasmic protein	1011963	1012289	-	327	108	4.51	3.22	2.82	2.34	41.9	38.58	42.79	24.58
STM14_1421	-	conserved hypothetical protein	1286913	1287239	-	327	108	6.08	2.15	6.91	9.6	10.93	6.54	14.13	11.87
STM14_1817	ynfA	hypothetical protein	1591778	1592104	+	327	108	31.97	16.84	22.02	17.33	10.93	8.5	13.71	8.05
STM14_2496	-	putative cytoplasmic protein	2144508	2144834	-	327	108	19.22	13.97	21.51	13.12	34.61	11.77	49.86	25.43
STM14_5504	trpR	Trp operon repressor	4853863	4854189	+	327	108	85.7	120.38	273.19	146.39	99.28	81.74	179.9	126.28
STM14_0036	-	hypothetical protein	32116	32445	+	330	109	14.57	15.27	19.54	6.73	8.12	9.72	14.41	7.56
STM14_0520	cyoD	cytochrome o ubiquinol oxidase subunit IV	494949	495278	-	330	109	1801.76	1419.41	1295.44	1231.98	1775.31	1558.36	1256.93	1402.93
STM14_0655	-	sensor kinase	619284	619613	-	330	109	36.73	34.08	38.06	8.12	29.78	17.5	29.23	21
STM14_1180	-	minor tail protein	1083959	1084288	+	330	109	0.78	1.07	2.79	0.7	6.32	5.83	5.35	7.14
STM14_1229	yccK	sulfurtransferase TusE	1132196	1132525	-	330	109	176.06	306.04	178.1	126.73	120.94	145.14	148.21	120.1
STM14_3010	-	putative inner membrane protein	2613677	2614006	+	330	109	16.91	14.56	8.63	7.2	31.59	22.68	21	19.74
STM14_3073	-	putative cytoplasmic protein	2673495	2673824	+	330	109	10.49	9.59	15.48	2.79	15.34	13.61	15.64	9.24
STM14_2192	ycgL	putative cytoplasmic protein	1922357	1922689	-	333	110	341.04	283.58	300.45	296.02	155.63	77.7	159.53	154.8
STM14_2359	-	putative inner membrane protein	2046185	2046517	-	333	110	33.7	47.85	544.33	34.73	42.04	33.39	317.83	61.59
STM14_4419	-	hypothetical protein	3863890	3864222	+	333	110	321.98	175.56	226.28	83.72	135.06	57.79	124.44	88.22
STM14_2211	-	putative cytoplasmic protein	1939453	1939788	-	336	111	62.03	25.11	49.09	17.78	46.09	17.82	87.74	29.28
STM14_2840	-	putative inner membrane protein	2462164	2462499	+	336	111	11.64	17.09	74.75	22.57	52.3	79.55	271.32	138.57
STM14_4602	yidQ	hypothetical protein	4024328	4024663	+	336	111	195.43	28.94	105.15	73.63	130.31	29.91	116.45	74.23
STM14_3178	-	minor tail-like protein	2797782	2798120	-	339	112	1.13	0.69	1.23	0.68	4.39	3.15	2.81	1.64
STM14_3383	ygaM	hypothetical protein	2969544	2969882	+	339	112	2649.05	81.22	1078.78	150.93	665.97	35.95	305.39	86.66
STM14_5331	-	putative cytoplasmic protein	4696774	4697112	+	339	112	10.59	0	3.21	5.2	15.81	2.52	6.81	9.4
STM14_1975	-	putative inner membrane protein	1732617	1732961	-	345	114	5.95	10.19	11.41	4.66	7.77	9.3	18.51	5.62
STM14_4519	-	putative cytoplasmic protein	3962679	3963023	-	345	114	3.16	4.08	10.19	2	5.18	4.34	14.18	5.22
STM14_0199	yacC	putative periplasmic protein	196688	197035	-	348	115	59.34	39.05	81.32	71.31	35.95	26.42	80.42	62.91
STM14_3022	eutN	putative detox protein	2626364	2626711	-	348	115	0.37	0	0.72	0	5.99	0	5.08	2.39
STM14_3501	-	putative cytoplasmic protein	3065934	3066281	+	348	115	34.83	14.48	37.05	21.79	33.38	18.43	43.34	27.08
STM14_4708	-	cyclic nucleotide-binding domain protein	4132921	4133268	+	348	115	18.24	15.49	13.95	11.67	14.55	13.52	16.79	9.95
STM14_2341	flhD	transcriptional activator FlhD	2033121	2033471	-	351	116	122.41	158.88	111.63	128.09	287.66	229.06	185.02	232.14
STM14_3223	-	hypothetical protein	2824312	2824662	+	351	116	48.05	29.37	12.64	57.39	12.73	12.79	4.64	16.98
STM14_4523	-	putative cytoplasmic protein	3964888	3965238	+	351	116	10.23	11.02	6.92	5.89	43.28	42.64	42.19	29.21
STM14_3055	-	putative glycerate kinase	2657708	2658061	-	354	117	3.99	1.32	0.95	2.6	72.36	32.62	86.35	85.73
STM14_3536	ygbE	hypothetical protein	3092213	3092569	-	357	118	23.35	8.53	48.78	41.19	70.91	23.36	261.83	251.52
STM14_4154	yheM	hypothetical protein	3616988	3617344	-	357	118	66.64	58.09	73.17	51.71	166.02	130.57	122.54	124.99
STM14_1655	ydiL	putative cytoplasmic protein	1454280	1454639	-	360	119	5.17	0.65	3.72	2.77	2.48	1.19	3.02	1.54
STM14_2462	-	hypothetical protein	2118324	2118683	-	360	119	98.15	64.44	142.56	217.23	148.09	128.89	216.62	298.31
STM14_3217	-	putative regulator	2821377	2821736	+	360	119	236.2	254.5	137.45	115.95	335.9	255.41	190.21	225.18
STM14_4635	rnpA	ribonuclease P	4059535	4059894	+	360	119	188.28	225.53	109.54	133.82	765.29	1051.92	920.09	1063.15
STM14_0536	-	hypothetical protein	511028	511390	-	363	120	48.05	71.65	31.6	26.37	99.28	166.7	83.84	75.2
STM14_0652	gtrA	putative glycosyl translocase	618054	618416	-	363	120	4.59	41.31	5.77	6.12	17.23	72.45	17.97	19.85
STM14_4447	yibL	hypothetical protein	3893340	3893702	+	363	120	265.69	367.94	185.21	122.38	82.87	90.72	79.72	68.71
STM14_4593	yidG	putative inner membrane protein	4020076	4020438	-	363	120	34.27	28.73	89.26	22.79	101.74	48.89	176.28	55.35
STM14_5056	-	putative phage glucose translocase	4440458	4440820	-	363	120	5.12	29.37	6.23	7.17	33.64	26.51	23.58	22.52
STM14_0742	-	hypothetical protein	698354	698719	+	366	121	277.36	492.97	154.64	156.95	123.69	125.03	171.5	132.89
STM14_5209	yjeI	putative outer membrane lipoprotein	4589814	4590185	+	372	123	1134.28	402.5	1182.27	847.26	469.98	208.66	506.2	394.85
STM14_1150	-	regulatory protein	1064144	1064518	+	375	124	19.15	7.5	5.14	6.94	2.38	1.71	7.61	9.61
STM14_1713	ssaP	type III secretion system apparatus protein	1507329	1507703	+	375	124	9.06	8.75	20.76	25.12	19.86	6.84	21.74	26.98
STM14_3215	-	prophage cI protein	2820665	2821039	-	375	124	9.92	9.37	9.15	12.46	5.56	3.99	9.78	11.82
STM14_0567	ybaN	hypothetical protein	540406	540783	+	378	125	73.29	57.96	84.17	90.57	71.7	21.5	104.23	61.22
STM14_3664	-	putative virulence-associated protein	3214693	3215070	-	378	125	477.56	338.77	360.59	399.17	137.1	131.8	167.85	159.47
STM14_2996	yfeK	hypothetical protein	2602140	2602520	+	381	126	4.21	5.54	6.59	5.23	14.85	14.59	15.33	24.73
STM14_0850	-	putative inner membrane protein	797694	798080	+	387	128	1004.81	88.7	206.61	193.56	2089.5	164.65	463.41	1053.07
STM14_2009	ynaJ	putative inner membrane protein	1766256	1766642	-	387	128	327.43	233.11	337.28	249.57	128.53	121	180.45	147.88
STM14_2387	-	putative 50S ribosomal protein	2066907	2067293	+	387	128	107.71	7.57	6.71	9.9	98.51	48.62	5.27	9.31
STM14_2497	-	hypothetical protein	2144828	2145214	-	387	128	15.58	15.44	13.63	7.92	52.33	39.78	81.8	46.55
STM14_0851	sdhC	succinate dehydrogenase cytochrome b556 large membrane subunit	798489	798878	+	390	129	1982.33	295	575.98	879.05	1496.08	203.96	438.94	610.07
STM14_4120	rpsK	30S ribosomal protein S11	3598828	3599217	-	390	129	4245.83	10678.1	4782.59	7112.53	6138.58	13799.6	5489.18	8273.07
STM14_5140	yjcH	putative inner membrane protein	4526696	4527085	-	390	129	196.49	1.2	37.35	33.78	293.26	7.68	45.98	42.64
STM14_2968	yfeD	putative negative regulator	2581269	2581661	+	393	130	113.57	45.31	44.1	64.51	79.58	40.81	42.18	51.83
STM14_0081	caiF	DNA-binding transcriptional activator CaiF	81260	81655	+	396	131	18.14	10.36	14.38	15.28	17.3	12.96	19.9	26.94
STM14_3912	yqjE	putative inner membrane protein	3415359	3415757	+	399	132	357.44	105.41	256	61.24	1095.82	264.2	774.65	241.02
STM14_1688	ssaB	secreted effector protein	1489975	1490376	+	402	133	0.48	0.87	2.71	3.24	0.74	0	4.39	7.24
STM14_2099	yciA	acyl-CoA thioester hydrolase	1841488	1841889	+	402	133	147.24	350.02	148.91	129.94	116.32	169.68	128.43	123.75
STM14_3331	-	putative transposase	2926750	2927154	-	405	134	1.11	0.29	3.1	0.38	6.62	2.11	10.06	2.4
STM14_4039	yhcB	cytochrome d ubiquinol oxidase subunit III	3528752	3529156	+	405	134	804.35	513.48	571.19	577.19	424.33	297.25	451.87	365.76
STM14_2439	-	hypothetical protein	2104733	2105140	-	408	135	18.86	9.48	142.82	212.7	18.98	12.05	47.29	189.86
STM14_5033	-	putative cytoplasmic protein	4420332	4420739	-	408	135	51.08	34.46	35.3	23.09	64.97	51.89	40.29	40.76
STM14_1148	-	regulatory protein	1063409	1063819	-	411	136	111.56	92.64	104.71	74.17	116.67	119.66	142.14	120.37
STM14_3388	nrdI	ribonucleotide reductase stimulatory protein	2972334	2972744	+	411	136	12.17	3.14	15.07	7.64	27.54	7.8	27.44	16.52
STM14_3870	yqiC	putative cytoplasmic protein	3377080	3377493	+	414	137	428.9	431	451.38	280.66	76.26	48.55	176.56	120.16
STM14_1579	-	pyrimidine (deoxy)nucleoside triphosphate pyrophosphohydrolase	1390429	1390845	-	417	138	89.81	52.54	48.39	40.41	104.28	60.51	47.24	45.86
STM14_3741	yqgF	Holliday junction resolvase-like protein	3277787	3278203	+	417	138	68.28	52.54	56.22	58.59	88.57	48.2	72.33	77.43
STM14_2249	-	putative acetyltransferase	1966412	1966831	-	420	139	358.8	92.89	254.36	167.59	140.41	51.93	126.48	97
STM14_3658	-	hypothetical protein	3210549	3210968	+	420	139	0	0	0.2	0.18	1.42	0.51	1.94	2.64
STM14_4821	-	putative cytoplasmic protein	4230571	4230990	-	420	139	137.26	328.88	358.82	293.61	290.75	824.26	319.28	455.64
STM14_0282	yaeJ	hypothetical protein	281938	282360	+	423	140	12.89	15.51	16.82	8.69	131.67	95.04	101.17	69.78
STM14_4037	rplM	50S ribosomal protein L13	3526710	3527138	-	429	142	4099.46	11618.8	4465.88	5427.92	3731.69	8951.91	3961.86	5250.54
STM14_0332	-	putative Shiga-like toxin A subunit	324081	324512	+	432	143	0.89	1.63	1.16	0.71	0.69	3.46	1.89	1.6
STM14_1699	sscB	secretion system chaparone	1497501	1497935	+	435	144	6.78	4.04	21.36	46.13	8.9	4.92	21.55	33.13
STM14_1838	marR	DNA-binding transcriptional repressor MarR	1607474	1607908	-	435	144	7.67	11.58	8.08	4.4	23.96	19.17	30.92	11.79
STM14_3766	-	putative lactoylglutathione lyase	3294633	3295067	-	435	144	35.67	26.66	36.76	16.38	27.39	33.43	21.86	12.11
STM14_4842	yihZ	D-tyrosyl-tRNA deacylase	4251795	4252232	+	438	145	184.47	134.01	416.52	132.9	182.92	111.8	337.79	115.48
STM14_0039	-	putative transcriptional regulator	34376	34816	-	441	146	8	2.13	2.09	3.99	1.35	0.97	2.46	0.94
STM14_2759	-	putative cytoplasmic protein	2385566	2386009	-	444	147	4.48	5.54	2.26	2.76	6.04	7.71	14.38	9.99
STM14_2889	-	putative phosphotransferase system enzyme II A component	2508239	2508682	-	444	147	207.69	4.75	10.94	23.46	339.43	6.26	11.32	12.48
STM14_3599	ygdK	putative FeS center assembly protein	3156970	3157413	+	444	147	59.5	59.37	74.86	48.82	42.26	50.09	45.9	39.01
STM14_5372	holC	DNA polymerase III subunit chi	4732701	4733144	-	444	147	67.59	60.16	66.38	44.85	293.82	290.4	264.99	192.25
STM14_5476	rimI	ribosomal-protein-alanine N-acetyltransferase	4825484	4825930	+	447	148	47.05	82.3	50.57	45.58	131.26	135.86	74.47	100.44
STM14_2612	wzb	tyrosine phosphatase	2252609	2253058	-	450	149	1.43	0.26	0.56	2.72	2.65	1.43	2.42	3.08
STM14_3006	yfeZ	putative inner membrane protein	2610811	2611260	-	450	149	36.05	40.88	37.95	18.55	107.88	87.43	107.48	85.3
STM14_934	moaE	molybdopterin synthase large subunit	873230	873682	+	453	150	69.51	68.02	125.86	115.65	91.39	81.19	108.87	129.7
STM14_3971	yhbC	hypothetical protein	3471027	3471479	-	453	150	330.97	600.02	388.5	372.48	354.38	662.73	397.99	456.7
STM14_1310	csgA	cryptic curlin major subunit	1189792	1190247	+	456	151	5.63	3.6	11.75	5.88	34.62	12.66	39.33	19.14
STM14_4493	dut	deoxyuridine 5'-triphosphate nucleotidohydrolase	3938414	3938869	+	456	151	527.21	971.71	532.64	548.75	261.92	423.44	267.85	315.74
STM14_5111	-	putative outer membrane lipoprotein	4486168	4486623	-	456	151	1.55	1.8	2.94	1.68	14.37	15.01	9.24	11.55
STM14_4673	asnC	DNA-binding transcriptional regulator AsnC	4098392	4098850	-	459	152	58.12	79.38	59.83	52.73	23.36	12.58	33.15	29.89
STM14_4756	yigG	hypothetical protein	4173261	4173719	-	459	152	3.21	3.57	0.73	1.33	7.79	6.99	4.44	5.13
STM14_1322	-	hypothetical protein	1200601	1201062	+	462	153	18.04	13.95	19.57	16.41	17.41	12.96	24.41	19.8
STM14_3448	hycA	formate hydrogenlyase regulatory protein HycA	3019362	3019823	-	462	153	0.14	0.25	0	0	2.58	0.93	2.06	1.8
STM14_5238	yjeE	putative ATPase	4612717	4613178	+	462	153	140.19	133.39	171.07	87.2	156.66	95.81	123.81	86.38
STM14_1453	-	bacteriophage lysis protein	1304183	1304647	+	465	154	2.9	2.77	7.02	2.31	3.2	4.6	37.98	5.36
STM14_3615	ppdA	hypothetical protein	3177171	3177641	-	471	156	1.23	0.75	2.31	2.93	1.9	0.91	3.75	4.12
STM14_4054	argR	arginine repressor	3541927	3542397	+	471	156	251.6	346.26	222.91	329.3	137.85	162.98	146.54	233.6
STM14_1695	sscA	secretion system chaparone	1494497	1494970	+	474	157	3.65	2.47	13.6	31.67	19.48	5.86	44.71	89.17
STM14_2602	wcaH	GDP-mannose mannosyl hydrolase	2242712	2243185	-	474	157	1.62	1.24	2.65	1.13	3.77	6.77	6.59	6.43
STM14_3194	-	endopeptidase-like protein	2810493	2810966	-	474	157	0.95	2.22	2.47	3.39	2.51	5.41	13.18	6.72
STM14_5460	-	hypothetical protein	4816997	4817470	-	474	157	16.37	5.19	33.03	19.71	12.57	16.69	38.12	22.8
STM14_5508	creA	hypothetical protein	4856580	4857053	+	474	157	179.93	229.87	311.4	153.67	135.1	137.59	143.6	111.38
STM14_3293	yfjG	hypothetical protein	2879775	2880251	-	477	158	316.46	345.59	283.64	261.41	223.54	163.17	178.3	194.64
STM14_3027	eutP	putative ethanolamine utilization protein	2629575	2630054	-	480	159	0.8	0	0.17	0.16	2.48	0	0.28	0.87
STM14_2535	pduK	polyhedral body protein	2174875	2175357	+	483	160	0.66	0.24	1.39	0.95	7.4	1.33	6.75	3.16
STM14_3294	smpB	SsrA-binding protein	2880401	2880883	+	483	160	324.75	390.53	269.37	261.34	140.6	82.34	161.18	146.89
STM14_0816	-	putative cytoplasmic protein	762010	762495	-	486	161	4.49	1.21	1.38	0.63	19.61	6.16	9.5	7.41
STM14_932	moaC	molybdenum cofactor biosynthesis protein C	872505	872990	+	486	161	125.22	109.45	161.94	148.93	107.25	81.84	107.91	140.85
STM14_2458	-	lysis protein	2116355	2116840	-	486	161	3.96	1.93	15.68	55.47	9.81	4.84	24.88	110.91
STM14_2936	sixA	phosphohistidine phosphatase	2548963	2549448	-	486	161	294.24	442.12	316.98	231.67	329.71	365.18	364.26	311.93
STM14_3914	yqjF	hypothetical protein	3416198	3416683	+	486	161	4.49	5.06	1.55	1.26	1.84	6.6	2.8	3.14
STM14_4917	menG	ribonuclease activity regulator protein RraA	4311161	4311646	-	486	161	298.73	266.62	445.67	306.06	309.48	260.03	363.42	299.67
STM14_2609	wcaB	putative colanic acid biosynthesis acetyltransferase WcaB	2249033	2249521	-	489	162	1.97	1.92	2.23	1.57	6.09	5.25	5.28	3.97
STM14_2792	eco	ecotin precursor	2411612	2412106	+	495	164	412.35	112.9	108.08	43.33	101.09	34.13	54.07	27.99
STM14_3736	sprT	hypothetical protein	3273934	3274431	+	498	165	13.91	28	14.96	10.3	28.11	29.2	41.47	26.43
STM14_0056	lspA	lipoprotein signal peptidase	56689	57189	+	501	166	167.68	190.12	186.17	192.63	479.16	461.8	384.26	472.69
STM14_0399	-	putative periplasmic protein	387001	387501	+	501	166	11.65	2.1	2.01	2.29	15.46	5.12	3.25	4.15
STM14_4032	sspB	ClpXP protease specificity-enhancing factor	3523943	3524443	-	501	166	377.08	601.94	381.35	320.9	688.42	889.89	524.47	537.97
STM14_1269	scsD	suppression of copper sensitivity protein	1161405	1161911	+	507	168	2.4	2.77	1.98	1.36	10.57	5.9	9.65	7.11
STM14_2375	tnpA_7	transposase for IS200	2057140	2057649	-	510	169	9.56	10.57	9.19	6.61	116.22	47.8	293.3	216.55
STM14_0352	safA	putative outer membrane protein	342894	343406	+	513	170	7.13	25.58	29.7	4.03	11.61	9.59	12.45	3.51
STM14_0566	priC	primosomal replication protein N''	539810	540325	-	516	171	26.84	27.47	37.48	20.19	52.53	38.95	64.51	41.36
STM14_1925	yncA	putative acyltransferase	1688322	1688837	+	516	171	89.73	45.18	109.85	92.03	43.29	24.45	62.4	52.64
STM14_3820	-	putative ATP-dependent RNA helicase-like protein	3335299	3335814	-	516	171	192.5	79.47	9.09	16.77	193.37	73.35	12.9	18.8
STM14_4802	mobB	molybdopterin-guanine dinucleotide biosynthesis protein B	4215268	4215783	-	516	171	16.9	15.44	33.91	14.84	20.78	23.21	28.17	18.53
STM14_4814	yihI	hypothetical protein	4224051	4224566	+	516	171	269.31	547.88	487.58	330.12	126.41	236.21	255.14	197.92
STM14_5137	-	LrgA family protein	4523814	4524329	+	516	171	5.22	12.72	6.98	11.43	10.97	11.6	9.74	13.43
STM14_1363	yceD	hypothetical protein	1233436	1233957	+	522	173	234.15	693.98	313.56	255.02	2157.92	4830	2558.74	2732.41
STM14_4199	aroK	shikimate kinase I	3656122	3656643	-	522	173	597.16	1298.64	672.36	666.15	604.81	916.76	585.61	662.59
STM14_2468	-	putative transcriptional activator	2122501	2123025	-	525	174	7.21	3.79	5.58	4.23	8.51	5.7	5.95	10.82
STM14_1302	ycdZ	putative inner membrane protein	1185618	1186148	+	531	176	48.06	15.44	11.51	17.89	138.54	87.79	91.34	81.42
STM14_2272	-	phage-tail assembly-like protein	1976912	1977445	-	534	177	0.72	0	0.94	0.57	6.69	0.4	5.09	7.01
STM14_0202	hpt	hypoxanthine-guanine phosphoribosyltransferase	201521	202057	+	537	178	313.23	649.29	329.44	394.52	211.32	301.83	225.43	232.5
STM14_4387	lpfA	long polar fimbrial protein A precursor	3841140	3841676	-	537	178	0.84	0.87	2.18	1	2.22	2.39	4.3	2.06
STM14_0873	-	hypothetical protein	818715	819254	-	540	179	45.01	45.13	39.23	80	257.03	190.86	172.09	222.48
STM14_2997	yfeL	putative membrane carboxypeptidase	2602533	2603072	+	540	179	2.97	3.91	5.58	5.39	29.78	26.93	85.29	69.29
STM14_3337	fljA	phase-1 flagellin repressor	2932858	2933397	-	540	179	3.8	5.64	2.17	1.28	12.69	6.73	3.02	3.59
STM14_0635	fimA	fimbrin	604824	605366	+	543	180	65.43	96.66	89.74	427.68	43.33	39.38	54.8	153.37
STM14_1620	infC	translation initiation factor IF-3	1424110	1424652	+	543	180	2848.61	3321.26	2041.76	2561	3830.24	6292.8	4668.36	5532.65
STM14_1846	-	putative outer membrane protein	1615133	1615675	-	543	180	12.64	11.22	18.97	7.33	4.94	9.45	24.27	8.68
STM14_4742	-	putative inner membrane protein	4163251	4163793	+	543	180	2.24	8.85	3.39	1.27	8.23	13	5.5	3.06
STM14_0269	fabZ	(3R)-hydroxymyristoyl-ACP dehydratase	267151	267696	+	546	181	1083.1	1378.88	992.88	815.45	714.05	780.12	559.37	728.64
STM14_0630	ybcI	putative membrane-bound metal-dependent hydrolase	602509	603054	-	546	181	8.34	3	3.68	3.79	9.27	9.79	14.68	13.45
STM14_1126	ycbK	putative outer membrane protein	1045480	1046028	+	549	182	300.19	159.84	459.03	311.53	292.42	160.08	346.96	284.97
STM14_1706	-	putative cytoplasmic protein	1501020	1501568	+	549	182	0.82	0.21	2.14	8.93	3.26	2.73	14.35	43.16
STM14_2363	pgsA	phosphatidylglycerophosphate synthetase	2047218	2047766	-	549	182	245.53	127.4	161.96	202.85	154.62	79.46	138.09	171.89
STM14_3278	rimM	16S rRNA-processing protein	2869990	2870538	-	549	182	290.73	600.52	280.3	282.51	2770.08	6786.44	2402.71	3762.13
STM14_3698	ygfA	putative ligase	3241489	3242037	+	549	182	16.94	15.37	16.47	11.3	43.94	48.69	52.71	42.15
STM14_3148	yfhC	tRNA-specific adenosine deaminase	2765545	2766096	-	552	183	51.35	121.19	59	40.93	86.87	86	76.05	60.25
STM14_2014	-	putative thiol peroxidase	1769670	1770227	-	558	185	7.13	3.36	7.35	3.71	2.14	3.45	3.41	2.48
STM14_3007	-	putative acetyltransferase	2611247	2611807	-	561	186	72.7	70.59	97.31	64.03	114.15	112.44	125.69	85.71
STM14_2773	-	putative outer membrane protein	2396962	2397525	-	564	187	1.59	1.04	102.43	2.31	0.53	0.38	37.1	1.23
STM14_3740	yqgE	hypothetical protein	3277224	3277787	+	564	187	156.68	99.71	130.78	137.7	100.34	60.66	112.5	105.89
STM14_4206	nudE	ADP-ribose diphosphatase NudE	3663196	3663759	-	564	187	225.58	186.75	184.37	135.26	154.2	131.18	144.78	120.39
STM14_4861	-	hypothetical protein	4266425	4266991	+	567	188	53.95	46.49	49.76	42.42	67.24	61.09	54.39	51.32
STM14_2903	ubiX	3-octaprenyl-4-hydroxybenzoate carboxy-lyase	2518134	2518703	-	570	189	64.35	62.69	79.91	59.26	85.17	51.39	94.15	67.58
STM14_0731	pagP	palmitoyl transferase for Lipid A	692651	693223	+	573	190	117.17	210.81	804.95	128.99	87.33	156.73	705.16	111.73
STM14_1326	-	putative inner membrane protein	1203594	1204166	-	573	190	17.35	4.7	33.9	8.96	28.59	14.18	52.64	14.51
STM14_0783	-	putative inner membrane protein	737794	738369	-	576	191	6.46	5.09	4.07	3.46	23.79	10.02	21.94	15.64
STM14_0814	seqA	replication initiation regulator SeqA	759655	760230	+	576	191	428.51	478.2	273.41	346.4	305.6	256.89	254.74	271.13
STM14_1960	-	putative periplasmic protein	1719033	1719608	-	576	191	3.34	7.73	9.74	3.99	4.65	10.02	6.6	4.09
STM14_1757	ydgM	electron transport complex protein RnfB	1543746	1544324	-	579	192	37.32	77.09	62.03	43.92	103.91	141.08	123.43	98.6
STM14_1901	-	putative transcriptional regulator	1668391	1668969	+	579	192	19.6	22.46	16.92	8.47	46.81	42.47	47.4	30.16
STM14_2518	cbiT	cobalt-precorrin-6Y C(15)-methyltransferase	2160068	2160646	-	579	192	27.02	2.63	14.89	9	28.29	4.43	9.39	8.86
STM14_3696	ygfB	hypothetical protein	3240121	3240699	-	579	192	165.02	157.43	127.68	120.91	202.16	148.83	114.51	127.56
STM14_4311	acpT	holo-(acyl carrier protein) synthase 2	3764371	3764949	+	579	192	34.78	25.5	28.78	23.55	98.25	74.23	84	62.94
STM14_0543	ybaO	putative transcriptional regulator	516834	517418	+	585	194	59.3	40.25	43.65	34.83	58.04	43.13	49.47	40.03
STM14_2234	yebR	putative nucleotide-binding protein	1955391	1955975	-	585	194	512.57	376.91	520.81	429.57	348.75	225.53	399.46	347.49
STM14_1605	ydjM	hypothetical protein	1411579	1412166	-	588	195	2.62	4.38	2.14	3	13.17	9.82	17.56	12.25
STM14_5217	ecnR	putative regulatory protein	4593487	4594074	-	588	195	92.92	64.96	11.96	7.03	184.38	43.27	74.17	31.34
STM14_4445	mtlR	mannitol repressor protein	3892240	3892830	+	591	196	20.83	22.2	24.51	18.92	76.1	56.44	67.36	51.35
STM14_1735	ydhM	putative transcriptional repressor	1524058	1524657	-	600	199	19.67	19.72	19.54	12.89	28.79	24.95	31.93	25.4
STM14_2011	-	putative transcriptional regulator	1767866	1768468	-	603	200	30.52	36.33	42.49	33.91	22.72	21.28	23.21	14.25
STM14_0571	recR	recombination protein RecR	543904	544509	+	606	201	118.31	185.02	154.05	119.69	497.38	756.52	525.96	542.17
STM14_5048	-	putative cytoplasmic protein	4433373	4433978	-	606	201	10.37	8.7	23.35	9.98	15.24	12.7	16.37	4.8
STM14_5070	-	putative soluble lytic murein transglycosylase	4450058	4450663	-	606	201	0.21	0.19	0.28	0.13	2.95	2.82	4.93	3.89
STM14_1474	-	tail assembly protein I-like protein	1322136	1322744	+	609	202	2.53	3.85	7.97	6.29	2.93	4.56	8.25	3.87
STM14_3879	ygiM	putative signal transduction protein	3386797	3387411	+	615	204	215.11	97.35	129.33	105.74	116.23	42.77	80.41	64.89
STM14_4791	yigZ	hypothetical protein	4206711	4207325	+	615	204	28.26	31.81	28.72	23.66	160.79	107.44	100.52	109.28
STM14_4611	ccmA_2	cytochrome c biogenesis protein CcmA	4031665	4032282	-	618	205	3.84	2.65	6.23	4.21	17.83	11.07	22.2	17.04
STM14_2216	yebN	hypothetical protein	1943495	1944115	+	621	206	3.82	36.6	2.7	5.43	17.75	71.62	14	18.07
STM14_4505	gmk	guanylate kinase	3946790	3947413	+	624	207	206.36	340.78	171.88	193.57	264.43	368.38	293.71	261.6
STM14_5464	bglJ	DNA-binding transcriptional activator BglJ	4819687	4820310	+	624	207	0.72	0.94	0.54	0.12	20.05	18.85	38.1	23.1
STM14_1195	-	hypothetical protein	1099932	1100558	-	627	208	3.48	1.68	4.14	2.69	7.13	3.75	8.02	7.74
STM14_0810	fldA	flavodoxin FldA	757625	758254	-	630	209	878.12	1102.79	673.25	636.21	346.06	404.92	313.56	316.73
STM14_4670	gidB	glucose-inhibited division protein B	4094865	4095494	-	630	209	115.63	257.57	168.78	164.13	96.92	179.21	95.75	104.26
STM14_1681	ttrR	response regulator	1483060	1483698	+	639	212	35.53	7.7	28.56	20.62	46.14	12.72	27.64	26.02
STM14_3065	purN	phosphoribosylglycinamide formyltransferase	2665662	2666300	+	639	212	50.68	105.43	163.26	186.27	72.71	133.18	290.86	431.55
STM14_0405	-	putative response regulator	391749	392390	+	642	213	0.8	2.92	1.17	0.84	2.78	3.33	4.66	1.08
STM14_0753	nadD	nicotinic acid mononucleotide adenylyltransferase	707342	707983	-	642	213	44.65	32.67	55.29	46.05	74.69	58.95	69.41	67.99
STM14_2831	yfaZ	putative inner membrane protein	2453329	2453976	-	648	215	138.64	228.35	62.41	113.59	103.42	167.3	50.53	87.89
STM14_0561	acrR	DNA-binding transcriptional repressor AcrR	534448	535101	+	654	217	52.16	32.96	42.25	36.07	134.35	71.28	141.47	97.68
STM14_5114	ssb	single-strand DNA-binding protein	4489705	4490358	+	654	217	769.71	1202.41	1048.86	865.59	408.05	553.21	468.66	438.6
STM14_5181	-	putative anaerobic dehydrogenase component	4569273	4569926	+	654	217	9.41	2.87	8.83	4.8	14.57	7.85	20.36	12.29
STM14_1746	pdxH	pyridoxamine 5'-phosphate oxidase	1532680	1533336	+	657	218	108.73	106.1	176.5	161	70.27	81.69	116.42	115.79
STM14_2782	ccmB_1	heme exporter protein	2403942	2404601	-	660	219	2.82	2.13	2.66	2.55	13.54	13.93	19.14	17.64
STM14_4610	ccmB_2	heme exporter protein	4031009	4031668	-	660	219	2.14	0.53	2.54	2.67	22.11	11.66	23.47	17.01
STM14_4860	-	putative branched-chain amino acid permease	4265683	4266342	-	660	219	38.86	38.88	45.29	62.2	36.1	34.99	52.29	70.13
STM14_4925	-	putative outer membrane lipoprotein	4319606	4320268	-	663	220	5.42	4.95	4.8	4.51	9.88	14.84	16.8	12.96
STM14_1415	ymfC	putative ribosomal large subunit pseudouridine synthase	1282422	1283087	-	666	221	60.18	53.48	42.74	31.4	51.88	27.61	44.47	36.2
STM14_2241	pphA	serine/threonine protein phosphatase 1	1962094	1962762	-	669	222	5.46	1.23	31.41	2.63	23.15	4.16	93.82	10.56
STM14_5077	yjbF	putative outer membrane lipoprotein	4456072	4456740	+	669	222	4.41	1.23	5.01	2.4	17.36	6.07	10.97	5.39
STM14_5409	-	putative dienelactone hydrolase	4772861	4773535	-	675	224	13.87	13.54	29.52	18.16	30	17.11	75.28	33.87
STM14_0728	dpiA	two-component response regulator DpiA	690153	690833	+	681	226	29.19	12.56	22.62	13.38	24.93	13.19	18.35	13.84
STM14_1242	copR	transcriptional regulatory protein YedW	1141981	1142661	-	681	226	20.34	14.97	30.61	16.42	38.49	19.15	42.29	26.45
STM14_3161	rnc	ribonuclease III	2776380	2777060	-	681	226	286.26	379.52	280.56	335.16	275.1	294.84	244.19	280.2
STM14_3247	yfiP	putative cytoplasmic protein	2842980	2843660	+	681	226	41.62	78.28	84.34	79.97	59.48	54.32	79.8	78.34
STM14_3468	orgB	needle complex export protein	3034025	3034705	-	681	226	285.13	114.58	606.6	126.98	323.21	93.26	504.94	111.71
STM14_1068	-	putative integrase	984416	985099	-	684	227	4.22	0.34	3.55	1.12	9.58	2.19	6.16	2.84
STM14_4874	-	putative outer membrane protein	4276136	4276819	+	684	227	0.94	1.03	0.98	1.01	1.31	1.25	2.98	1.42
STM14_1824	ydfH	putative regulatory protein	1597964	1598650	-	687	228	95.49	42.29	140.76	91.87	60.7	28.32	118.06	74.43
STM14_2449	-	pro-head protease	2110377	2111063	-	687	228	4.76	1.02	7.56	19.18	6.94	8.09	24.92	102.67
STM14_3742	-	putative transcriptional regulator	3278250	3278936	-	687	228	12.04	29.16	14.87	10.48	35.55	54.78	44.5	36.11
STM14_4508	spoU	tRNA guanosine-2'-O-methyltransferase	3949878	3950567	+	690	229	50.28	62.99	62.37	60.5	202.01	219.1	167.76	176.93
STM14_5153	yjcO	TPR repeat-containing protein	4538026	4538715	-	690	229	67.47	32.94	78.63	100.79	50.5	33.16	68.72	76.52
STM14_5012	yjaH	putative inner membrane protein	4400574	4401266	+	693	230	48.03	61.03	50.26	54.38	351.56	293.75	290.15	291.74
STM14_2202	yeaZ	putative molecular chaperone	1929167	1929862	-	696	231	152.58	215.8	138.46	151.98	142.07	186.18	111.85	155.69
STM14_2474	-	regulatory protein	2126080	2126775	+	696	231	121.71	121.03	147.48	168.26	175.88	125.35	217.85	266.39
STM14_4267	yhhW	putative cytoplasmic protein	3726991	3727686	-	696	231	24.69	25.92	32.6	25.09	19.68	7.99	20.5	12.34
STM14_4538	mgtC	Mg2+ transport protein	3978180	3978875	-	696	231	0.64	0.84	99.72	2.64	2.14	4.3	357.81	4.58
STM14_1351	flgH	flagellar basal body L-ring protein	1220809	1221507	+	699	232	171.83	85.98	2.99	16.76	411.18	165.8	4.47	18.63
STM14_4477	rfaY	lipopolysaccharide core biosynthesis protein	3925458	3926156	-	699	232	103.57	99.06	58.09	84.26	80.11	71.28	55.01	73.75
STM14_3744	yggS	hypothetical protein	3280066	3280770	+	705	234	101.97	156.88	108.66	116.46	105.19	132.24	116.98	119.51
STM14_0125	thiQ	thiamine transporter ATP-binding subunit	124122	124829	-	708	235	21.92	23.66	80.53	74.97	35.34	42.28	94.41	83.38
STM14_0285	yaeB	putative regulatory protein	284996	285703	-	708	235	53.26	52.79	39.97	47.38	131.25	107.82	142.58	138.77
STM14_0763	ybeR	putative cytoplasmic protein	718694	719401	+	708	235	1.81	1.49	2.84	1.08	5.47	2.42	4.99	2.74
STM14_3714	-	putative ABC-type cobalt transport system permease component	3253466	3254173	+	708	235	4.71	0.66	2.72	1.08	20.61	4.53	9.21	10.76
STM14_0842	-	putative ABC-type polysaccharide/polyol phosphate transport system ATPase component	788607	789317	+	711	236	3.61	5.77	7.54	5.82	2.93	3.01	4.01	4.87
STM14_1813	ynfC	hypothetical protein	1589937	1590647	+	711	236	76.3	46.47	79.6	45.89	83.78	84.21	90.38	63.54
STM14_2733	yeiP	elongation factor P	2362139	2362849	+	711	236	249.11	392.84	435.81	368.53	88.81	139.24	205.61	190.61
STM14_0010	htgA	hypothetical protein	10092	10805	-	714	237	1.62	1.97	2.11	2.04	10.01	7.79	14.08	7.96
STM14_0353	safB	putative fimbrial assembly chaparone	343514	344227	+	714	237	3.59	2.46	3.17	1.5	12.1	6.29	9.32	6.02
STM14_0449	-	putative inner membrane protein	435408	436121	+	714	237	9.7	1.31	7.27	3.33	26.28	4.49	23.21	6.6
STM14_1041	artQ	arginine transporter permease subunit ArtQ	960623	961339	-	717	238	114.84	81.05	87.69	141.22	259.62	164.32	219.43	291.25
STM14_980	ybiV(2)	putative hydrolase	909061	909780	-	720	239	0.09	0.16	0	0.11	26.06	17.23	26.23	23.48
STM14_2735	yeiU	putative permease	2364078	2364797	+	720	239	128.88	249.45	236.52	124.14	148.92	265.21	336.83	166.29
STM14_3754	trmB	tRNA (guanine-N(7))-methyltransferase	3286933	3287652	-	720	239	186.68	535.52	251.41	212.44	205.18	429.44	249.08	210.55
STM14_3060	yfgE	DNA replication initiation factor	2661412	2662137	-	726	241	64.74	76.82	63.08	53.17	139.07	138.13	159.82	151.55
STM14_1684	orf242	putative regulatory protein	1485236	1485964	-	729	242	20.85	12.7	41.46	14.81	23.29	19.07	75.11	33.64
STM14_4014	mtgA	monofunctional biosynthetic peptidoglycan transglycosylase	3502783	3503511	-	729	242	27.18	21.86	32.5	15.13	98.05	83.01	104.18	75.65
STM14_0309	dnaQ	DNA polymerase III subunit epsilon	304102	304833	+	732	243	151.56	155.89	145.6	101.18	107.82	96.69	110.99	95.41
STM14_1779	rstA	DNA-binding transcriptional regulator RstA	1561266	1561997	-	732	243	261.85	265.85	617.64	289	255.93	185.79	578.16	275.63
STM14_3121	-	putative rRNA methylase	2735138	2735869	-	732	243	156.9	326.67	222.35	234.07	133.05	205.36	146.63	172.27
STM14_4042	-	putative inner membrane protein	3531877	3532608	-	732	243	19.01	8.64	46.44	9.84	22.38	16.07	19.67	15.33
STM14_0833	ybgL	hypothetical protein	780876	781610	+	735	244	33.59	15.62	65.73	30.64	96.85	32.87	108.5	64.67
STM14_3174	-	tail assembly protein K-like protein	2792931	2793668	-	738	245	3.22	6.03	5.56	2.59	3.63	8.4	7.55	6.76
STM14_0837	-	putative cytoplasmic protein	783488	784228	+	741	246	1.38	0	6.33	2.58	6.03	2.6	18.52	16.08
STM14_1360	-	putative inner membrane lipoprotein	1231409	1232152	+	744	247	12.24	17.48	8.33	9.78	38.43	26.73	26.11	32.22
STM14_1855	-	putative Ni/Fe hydrogenase 1 b-type cytochrome subunit	1621279	1622022	-	744	247	21.12	5.04	30.16	25.63	32.83	13.22	40.17	38.37
STM14_2606	wcaE	glycosyl transferase	2245871	2246617	-	747	248	2.23	2.35	3.36	2.97	8.37	6.87	8.91	7.98
STM14_1629	btuD	vitamin B12-transporter ATPase	1431170	1431919	+	750	249	34.71	19.53	34.72	22.98	92.93	29.65	65.76	34.74
STM14_3498	invF	invasion regulatory protein	3063519	3064268	-	750	249	129.45	1.56	1.56	13.38	235.49	4.85	4.35	23.28
STM14_0793	nagD	UMP phosphatase	741390	742142	-	753	250	148.69	177.68	170.67	162.75	111.54	106.49	123.23	136.73
STM14_1679	ttrB	tetrathionate reductase complex subunit B	1480409	1481161	-	753	250	0.51	0	0.67	1.02	0.4	0.85	3.07	1.29
STM14_2060	yciT	putative regulatory protein	1809601	1810353	+	753	250	160.36	148.74	176.9	157.15	98.09	72.7	121.25	103.24
STM14_0696	entA	2,3-dihydroxybenzoate-2,3-dehydrogenase	660615	661370	+	756	251	17.47	7.28	58.25	44.48	20.09	9.62	51.4	41.24
STM14_2301	znuC	high-affinity zinc transporter ATPase	1998843	1999598	+	756	251	30.37	62.92	48.29	43.56	28.37	52.04	42.23	43.62
STM14_4253	-	putative transcriptional regulator	3711678	3712433	-	756	251	119.35	90.35	63.9	95.84	84.31	77.5	59.84	72.77
STM14_3470	prgK	needle complex inner membrane lipoprotein	3035233	3035991	-	759	252	130.79	4.48	4.96	17.86	653.37	26.2	42.96	101.33
STM14_1825	ydfG	3-hydroxy acid dehydrogenase	1598780	1599541	-	762	253	401.51	194.04	615.08	495.64	161.82	67.07	272.62	228.77
STM14_3530	surE	stationary phase survival protein SurE	3088715	3089476	-	762	253	98.21	88.41	114.38	88.35	223.97	175.67	174.2	150.21
STM14_0398	-	putative inner membrane protein	386264	387028	+	765	254	35.37	6.59	6.35	4.21	30.37	5.87	5.15	6.88
STM14_3142	yfhG	hypothetical protein	2756961	2757725	-	765	254	51.3	42.27	55.05	50.06	125.76	76.31	119.7	95.46
STM14_0196	-	putative transcriptional regulator	194109	194876	+	768	255	58.11	48.82	55.82	45.98	103.93	81.3	108.27	107.9
STM14_0813	ybfF	hypothetical protein	758733	759503	-	771	256	121.68	115.49	112.61	135.6	48.29	40.21	72.78	81.06
STM14_0303	yafD	hypothetical protein	298940	299719	+	780	259	56.81	45.66	47.55	68.54	108.44	46.33	85.35	93.8
STM14_1227	-	regulatory protein	1131090	1131869	+	780	259	3.86	3.45	6.76	4.71	27.49	13.43	33.27	23.81
STM14_4781	tatC	TatABCE protein translocation system subunit	4195004	4195783	+	780	259	106.88	134.28	125.26	102.22	218.42	231.65	284.79	190.62
STM14_1700	sseF	secreted effector protein	1497951	1498733	+	783	260	1.15	1.05	3.1	4.01	7.61	4.64	14.05	17.17
STM14_3573	yqcB	tRNA pseudouridine synthase C	3135354	3136136	-	783	260	28.5	48.63	43.41	31.5	65.43	99.13	64.03	59.64
STM14_3110	sseB	enhanced serine sensitivity protein SseB	2726784	2727569	-	786	261	187.65	145.48	156.05	198.4	144.37	141.19	109.93	157.26
STM14_4529	marT	putative transcriptional regulator	3971890	3972678	-	789	262	21.78	15.44	17.61	8.06	23.03	14.91	24.45	16.86
STM14_5466	fhuF	ferric iron reductase involved in ferric hydroximate transport	4820970	4821758	-	789	262	195.79	17.82	199.5	141.34	183.08	16.53	292.73	196.88
STM14_1860	-	putative regulatory protein	1626447	1627238	+	792	263	57.33	40.83	106.88	62.09	39.11	33.21	69.65	52.84
STM14_3283	corE	hypothetical protein	2872646	2873437	+	792	263	77	94.08	46.09	78.43	113.19	102.32	112.02	107.95
STM14_4031	yhcK	transcriptional regulator NanR	3523043	3523834	-	792	263	75.79	71.45	79.07	54.35	93.26	86.67	101.9	72.79
STM14_0229	fhuC	iron-hydroxamate transporter ATP-binding subunit	226681	227478	+	798	265	93.14	11.16	135.34	94.16	132.12	27.87	180.13	153.68
STM14_5487	deoC	deoxyribose-phosphate aldolase	4834246	4835043	+	798	265	276.03	68.56	227.67	82.74	133.62	28.14	78.32	34.9
STM14_0246	btuF	vitamin B12-transporter protein BtuF	241973	242773	-	801	266	21.54	23.99	18.4	18.84	49.45	52.59	42.06	48.44
STM14_0381	-	IS3 transposase	369882	370682	-	801	266	0.08	0.15	0.42	0.48	3.35	2.4	2.88	2.77
STM14_2372	fliY	cystine transporter subunit	2054595	2055395	-	801	266	244.02	87.61	1744.2	856.39	281.48	93.97	577.71	386.13
STM14_3559	mazG	nucleoside triphosphate pyrophosphohydrolase	3120420	3121220	-	801	266	142.82	109.12	129.51	97.25	91.84	71.01	90.41	71.28
STM14_3025	eutT	putative cobalamin adenosyltransferase	2628108	2628911	-	804	267	0.72	0.15	0.31	0.1	6.3	3.19	4.06	3.96
STM14_0718	rna	ribonuclease I	680485	681291	-	807	268	231.63	167.1	943.79	262.33	178.26	104.66	784.03	206.23
STM14_1580	xthA	exonuclease III	1390918	1391724	-	807	268	191.82	197.3	212.89	212.98	88.58	65.71	102.19	90.15
STM14_3667	-	putative inner membrane protein	3215623	3216429	+	807	268	6.91	4.21	149.19	12.15	11.44	9.8	77.11	10.99
STM14_2143	ychA	putative transcriptional regulator	1881988	1882797	-	810	269	77.51	123.81	86.62	97.3	115.83	171.33	121.44	133.95
STM14_3849	ygiX	DNA-binding transcriptional regulator QseB	3358897	3359709	+	813	270	26.42	20.61	49.02	26	37.37	23.15	33.42	29.32
STM14_5366	miaE	hydroxylase	4726178	4726990	+	813	270	40.15	56.06	42.94	41.08	57.88	77.06	61.33	57.95
STM14_3584	xni	exonuclease IX	3143407	3144222	+	816	271	24.6	31.01	28.93	22.62	45.26	49.79	41.62	38.04
STM14_3721	-	putative hydrolase/acyltransferase	3259783	3260598	-	816	271	3.93	3.3	4.92	3.47	13.87	8.12	23.98	9.68
STM14_2315	yecE	hypothetical protein	2009175	2009993	+	819	272	19.1	12.45	23.31	16.37	41.82	12.27	44.96	36.38
STM14_0109	ksgA	dimethyladenosine transferase	103375	104196	-	822	273	365.88	408.49	262.07	335.72	407.27	311.12	267.43	274.28
STM14_5390	-	putative cytoplasmic protein	4754205	4755026	-	822	273	43.92	17.82	38.6	31.03	124.64	67.11	76.03	85.3
STM14_0628	-	putative outer membrane protein	601258	602082	-	825	274	5.67	2.41	4.57	3.99	18.41	13.74	27.01	19.99
STM14_2932	mepA	penicillin-insensitive murein endopeptidase	2545265	2546089	-	825	274	46.64	65.04	82.3	75.11	96.03	113.52	116.92	117.58
STM14_0029	bcfB	fimbrial chaparone	24971	25798	+	828	275	3.49	4.1	9	1.76	8.27	11.1	34.13	7.7
STM14_3306	-	putative cytoplasmic protein	2902197	2903024	-	828	275	51.66	24.9	45.2	28.86	30.94	17.82	26.09	27.28
STM14_1046	ybjR	putative aminidase	964016	964846	+	831	276	16.51	11	41.11	15.3	85.3	49.66	179.19	76.21
STM14_3863	ygiD	hypothetical protein	3370409	3371239	-	831	276	6.4	2.54	5.14	2.58	40.5	37.05	54.77	32.18
STM14_4244	glpG	intramembrane serine protease GlpG	3700998	3701828	-	831	276	73.08	96.58	105.89	97.42	122.58	127.89	155.15	141.41
STM14_0341	-	putative RHS-like protein	337687	338520	+	834	277	13.46	9.97	19.98	5.79	74.64	34.1	53.11	29.74
STM14_0844	-	putative glycosyltransferase	791382	792215	+	834	277	2.08	1.55	1.91	4.04	1.43	1.79	3.75	4.15
STM14_3001	cysU	sulfate/thiosulfate transporter subunit	2606144	2606977	-	834	277	1.61	2.95	311.91	319.96	16.07	13.85	670.51	634.04
STM14_4585	-	integral membrane protein	4012345	4013178	+	834	277	10.15	6.04	2.71	9	32.5	15.9	14.99	23.26
STM14_3462	avrA	secreted effector protein	3030207	3031043	-	837	278	81.29	19.74	151.84	25.53	185.04	19.67	122.06	38.74
STM14_4196	dam	DNA adenine methylase	3652585	3653421	-	837	278	53.48	84.41	69.72	75.04	203.9	208.21	188.62	199.5
STM14_4853	fdhD	formate dehydrogenase accessory protein	4261587	4262423	+	837	278	44.82	39.61	60.82	42.64	45.19	40.36	62.66	49.5
STM14_5452	-	putative PTS permease	4809460	4810296	+	837	278	112.47	0.84	4.4	6.41	109.6	4.85	11.52	6.29
STM14_0107	apaH	diadenosine tetraphosphatase	102136	102984	-	849	282	140.64	48.99	109.27	111.51	216.8	95.71	129.94	124.37
STM14_3577	queF	7-cyano-7-deazaguanine reductase	3137691	3138539	+	849	282	93.36	137.72	121	105.37	79.28	90.67	86.73	83.89
STM14_4693	yifA	transcriptional regulator HdfR	4119236	4120084	-	849	282	68.81	38.36	80.47	49.35	49.82	37.02	72.01	54.51
STM14_2100	tonB	transport protein TonB	1841949	1842800	-	852	283	183.27	53.9	201.65	204.88	114.31	41.91	177.32	150.93
STM14_2943	-	hypothetical protein	2555315	2556166	-	852	283	299.71	376.92	385.41	225.55	261.83	330.28	376.49	266.41
STM14_1002	-	putative electron transfer protein beta subunit	927666	928520	+	855	284	2.93	1.37	3.33	3.05	0.7	0.5	3.34	3.08
STM14_1730	ydhO	putative cell wall-associated hydrolase	1520097	1520951	-	855	284	91.95	47.14	102.82	69.78	71.41	28.51	96.45	62.07
STM14_0264	cdsA	CDP-diglyceride synthase	260831	261688	+	858	285	128.33	153.48	80.89	123.99	308.95	297.32	225.96	250.82
STM14_1562	-	putative aldehyde reductase	1376495	1377352	+	858	285	73.1	66.23	117.19	62.76	45.13	30.9	52.41	39.73
STM14_3100	-	putative polyferredoxin	2712174	2713037	-	864	287	1.11	1.08	0.87	1.68	14.13	11.88	15.88	10.1
STM14_3647	-	putative transcriptional regulator	3200768	3201631	-	864	287	14.1	12.48	15.41	10.19	26.54	19.3	29.41	19.25
STM14_4826	-	putative membrane-associated metal-dependent hydrolase	4235683	4236546	-	864	287	5.57	4.2	4.94	1.06	11.72	6.68	8.02	3.69
STM14_5484	yjjW	pyruvate formate lyase-activating enzyme	4831619	4832482	-	864	287	1.19	0.54	1.07	1.24	10.69	4.95	9.59	7.54
STM14_3336	-	putative transposase	2931212	2932078	+	867	288	2.07	2.43	3.09	1.41	5.5	5.18	16.45	8.47
STM14_2984	cysZ	putative sulfate transport protein CysZ	2593747	2594619	+	873	290	87.56	75.96	61.28	54.22	64.82	46.78	73.3	60.16
STM14_4841	rbn	ribonuclease BN	4250926	4251798	+	873	290	31	20	75.96	15.44	131.69	73.97	267.68	56.67
STM14_2279	-	putative inner membrane protein	1980071	1980946	-	876	291	39.46	25.68	19.5	19.32	206.38	123.76	104.84	138.41
STM14_3618	lgt	prolipoprotein diacylglyceryl transferase	3178627	3179502	-	876	291	221.15	216.53	141.07	160.18	244.12	214.56	178.51	172.11
STM14_0776	ybeX	putative transport protein	732227	733105	-	879	292	363.02	218.19	184.78	258.27	342.23	183.42	215.46	257.28
STM14_2084	trpH	hypothetical protein	1828097	1828978	-	882	293	46.75	50.48	43.38	32.91	91.51	73.94	81.18	63.63
STM14_5327	-	putative endonuclease	4693072	4693956	+	885	294	9.2	3.04	10.12	3.81	14.47	12.56	12.74	11.43
STM14_5421	yjiH	putative inner membrane protein	4780569	4781453	-	885	294	2.17	1.06	3.5	2.42	4.71	3.87	6.6	3.29
STM14_4888	ushB	CDP-diacylglycerol pyrophosphatase	4288035	4288925	+	891	296	128.61	200.92	537.86	150.01	84.24	120.95	635.85	192.38
STM14_1119	-	hypothetical protein	1033980	1034873	+	894	297	8.82	4.85	11.61	16.19	19.66	12.44	22.19	25.27
STM14_2467	-	putative DNA methyl transferase	2121608	2122501	-	894	297	8.54	3.8	5.62	5.74	12.99	5.02	7.9	11.47
STM14_0219	yadB	glutamyl-Q tRNA(Asp) synthetase	216137	217033	-	897	298	76.78	35.27	34.63	50.55	137.8	52.44	62.25	75.7
STM14_0839	-	putative glycosyl transferase	785662	786558	+	897	298	0.86	0.65	1.68	2.05	2.66	1.19	5.15	5.1
STM14_1740	ydhJ	putative multidrug resistance efflux pump	1528562	1529458	-	897	298	34.89	46.63	65.24	22.03	22.91	30.04	54.83	17.61
STM14_1798	ynfL	putative transcriptional regulator	1574052	1574951	+	900	299	12.33	6.25	10.51	6.64	18.86	9.5	13.74	8.01
STM14_2583	rfbJ	CDP-abequose synthase	2221551	2222450	-	900	299	186.96	161.94	209.5	177.36	250.85	326.45	234.44	239.57
STM14_3009	hemF	coproporphyrinogen III oxidase	2612757	2613656	+	900	299	42.96	39.7	45.03	36.51	50.96	39.44	39.7	36.8
STM14_2346	otsB	trehalose-6-phosphate phosphatase	2036100	2037002	-	903	300	109.29	6.23	92.35	15.86	109.83	9.24	88.62	25.63
STM14_2547	pduX	propanediol utilization protein	2184264	2185166	+	903	300	3.27	3.63	7.14	6.53	22.43	23.92	51.76	35.6
STM14_4838	yihV	putative sugar kinase	4248403	4249305	+	903	300	17.33	4.28	18.36	10.26	9.57	3.08	9.93	6.45
STM14_2025	-	putative transcriptional regulator	1779925	1780830	-	906	301	13.24	7.37	11.83	5.83	19.4	6.61	15.3	7.65
STM14_5184	-	putative inner membrane protein	4571714	4572619	+	906	301	35.6	6.47	1.57	4.06	31.89	4.01	6.3	6.42
STM14_1589	-	nucleotide excision repair endonuclease	1399093	1400001	-	909	302	22.57	20.36	17.96	26.21	34.08	20.94	36.17	36.28
STM14_1874	-	putative cytoplasmic protein	1637896	1638804	+	909	302	8.18	5.41	10.96	3.54	12.12	11.53	18.53	6.1
STM14_3652	yohM	nickel/cobalt efflux protein RcnA	3203986	3204894	+	909	302	7.05	12.63	11.79	11.8	5.24	8.94	11.06	8.69
STM14_4807	yihG	putative endonuclease	4218419	4219327	-	909	302	17.07	42.02	15.29	19.55	20.64	20.47	36.92	31.1
STM14_4407	glyQ	glycyl-tRNA synthetase subunit alpha	3855540	3856451	-	912	303	455	753.7	686.69	568.32	300.78	491.67	435.89	414.04
STM14_3596	gcvA	DNA-binding transcriptional activator GcvA	3154081	3154998	-	918	305	35.42	45.43	37.12	34.12	64.24	76.17	94.42	51.32
STM14_977	ybiS	hypothetical protein	904949	905869	-	921	306	393.95	559.21	396.26	371.32	152.96	196.42	240.16	234.26
STM14_1965	ydcI	putative transcriptional regulator	1724872	1725795	+	924	307	279.41	25.49	152.32	89.36	325.88	20.83	148.95	109.33
STM14_2977	-	xanthosine phosphorylase	2586410	2587333	-	924	307	0.35	0.38	0.91	0.5	2.9	1.39	3.68	2.4
STM14_0773	gltI	glutamate and aspartate transporter subunit	729406	730332	-	927	308	2222.08	81.39	777.54	1208.3	917.62	42.44	283.6	449.8
STM14_2979	yfeR	putative transcriptional regulator	2588322	2589248	-	927	308	18.82	13.9	17.52	6.94	20.88	11.53	16.41	10.61
STM14_3155	-	putative transcriptional regulator	2772279	2773205	+	927	308	10.86	3.79	4.15	13.05	16.06	4.15	4.69	11.66
STM14_5279	yifZ	putative permease	4644931	4645857	+	927	308	7.13	10.11	6.05	4.87	13.49	13.84	12.75	10.02
STM14_4918	menA	1,4-dihydroxy-2-naphthoate octaprenyltransferase	4311739	4312668	-	930	309	68.13	110.61	41.95	61.85	57.01	112.89	59.9	56.62
STM14_3514	-	putative transcriptional regulator	3074812	3075744	+	933	310	12.23	7.03	10.41	6.16	99.28	6.88	12.09	8.02
STM14_2873	lrhA	NADH dehydrogenase transcriptional repressor	2491677	2492615	-	939	312	29.5	46.17	450.81	75.61	42.82	48.28	411.78	87.51
STM14_2300	znuA	high-affinity zinc transporter periplasmic component	1997820	1998764	-	945	314	132.39	148.9	164.17	115.82	137.42	100.69	131.69	108.95
STM14_2673	pbpG	D-alanyl-D-alanine endopeptidase	2317078	2318025	-	948	315	122.1	196.75	182.99	155.29	122.22	142.78	145.03	125.56
STM14_1940	sifB	secreted effector protein	1702158	1703108	+	951	316	0.67	1.36	7.31	21.99	1.88	1.57	10	28.27
STM14_4975	coaA	pantothenate kinase	4372275	4373225	-	951	316	106.41	109.77	73.51	141.02	106.17	96.23	78.72	116.42
STM14_5241	miaA	tRNA delta(2)-isopentenylpyrophosphate transferase	4616373	4617323	+	951	316	101.28	90.55	83.2	59.52	697.78	533.79	487.16	337.61
STM14_2464	-	hypothetical protein	2119348	2120301	-	954	317	6.65	6.26	7.64	6.02	17.17	13.45	13.67	13.94
STM14_2824	sseL	deubiquitinase	2446348	2447301	+	954	317	5.51	1.11	10.53	54.11	2.81	1.34	10.82	41.54
STM14_4737	hemC	porphobilinogen deaminase	4158740	4159696	-	957	318	217.37	187.06	186.43	178.72	243.07	159.53	173.63	171.01
STM14_4640	-	putative inner membrane protein	4065071	4066033	+	963	320	48.34	36.01	21.13	20.84	82.58	63.73	49.1	60.44
STM14_0389	-	putative transcriptional regulator	377348	378313	+	966	321	15.73	13.1	20.02	17.28	18.5	9.96	27.14	18.79
STM14_1389	ycfS	putative periplasmic protein	1255945	1256910	-	966	321	130.24	37.84	103.57	17.13	75.23	27.01	68.35	14.34
STM14_4082	yhdG	tRNA-dihydrouridine synthase B	3569170	3570135	+	966	321	24.63	81.87	42.73	43.21	393.42	1509.42	547.39	696.16
STM14_0489	tsx	nucleoside channel	468230	469198	-	969	322	4369.07	459.81	320.64	451.81	1944.11	201.69	135.16	167.89
STM14_1057	ybjX	VirK-like protein	975844	976812	-	969	322	520.56	756.04	926.06	628.87	326.73	407.58	851.77	412
STM14_1586	astE	succinylglutamate desuccinylase	1397229	1398197	+	969	322	190	0.6	8.12	6.4	401.73	5.52	11.78	7.72
STM14_2621	alkA	3-methyl-adenine DNA glycosylase II	2263041	2264012	-	972	323	18.74	3.62	10.16	4.57	20.84	4.84	16.77	8.55
STM14_4921	ftsN	essential cell division protein	4314698	4315672	-	975	324	96.95	108.27	77.37	89.87	117.61	101.1	131.4	117.39
STM14_1100	focA	formate transporter	1015797	1016774	-	978	325	68.45	131.06	98.28	205.19	153.79	144.96	234.77	343.03
STM14_1114	lpxK	tetraacyldisaccharide 4'-kinase	1030539	1031516	+	978	325	27.21	33.66	30.99	31.8	97.45	107.57	99.33	101.59
STM14_2041	pspF	phage shock protein operon transcriptional activator	1793276	1794256	+	981	326	20.92	25.2	26.37	24.05	19.73	20.27	25.48	18.36
STM14_3263	rluD	23S rRNA pseudouridine synthase D	2859464	2860444	-	981	326	226.31	312.31	218.31	188.16	190.06	187.45	644.55	163.71
STM14_0888	-	transcriptional regulator	827686	828669	-	984	327	4.63	3.69	5.19	3.04	5.45	2.82	5.94	5.07
STM14_3129	-	putative inner membrane protein	2740886	2741872	-	987	328	7.34	6.05	10.01	8.15	31.08	19.93	30.97	21.34
STM14_4843	yiiD	putative acetyltransferase	4252229	4253218	+	990	329	152.8	85.09	328.22	97.71	159.75	93.09	307.82	110.72
STM14_5387	-	putative restriction endonuclease	4748408	4749397	+	990	329	61.92	37.87	106.64	57.25	82.13	44.49	96.75	57.81
STM14_2045	sapD	peptide transport protein	1797856	1798848	+	993	330	35.84	29.14	29.17	34.94	62.99	53.83	53.5	51.35
STM14_4266	gntR	gluconate operon transcriptional repressor	3725866	3726861	-	996	331	69.34	107.63	88.6	67.98	59.51	77.72	71.61	57.04
STM14_5100	yjbN	tRNA-dihydrouridine synthase A	4477502	4478500	+	999	332	74.33	149.18	49.7	74.06	157.72	177.66	121.99	131.77
STM14_0425	-	putative transcriptional regulator	412206	413210	+	1005	334	40.33	8.63	74.39	31.86	67.27	16.38	114.23	59.98
STM14_2397	fliM	flagellar motor switch protein FliM	2074940	2075944	+	1005	334	211.27	119.03	5.25	17.15	321.55	134.25	10	25.65
STM14_3095	yfgA	hypothetical protein	2708953	2709957	-	1005	334	226.84	207.16	236.76	190.99	265.83	231.28	272.54	235.09
STM14_1947	tehA	potassium-tellurite ethidium and proflavin transporter	1708922	1709935	-	1014	337	28.4	24.03	34.27	20.85	37.89	30.58	47.03	43.46
STM14_3358	nixA	putative nickel transporter	2951448	2952461	-	1014	337	25.61	8.78	9.5	2.95	57.57	13.5	42.21	12.3
STM14_4479	rfaI	lipopolysaccharide-alpha-1, 3-D-galactosyltransferase	3927207	3928220	-	1014	337	84.68	132.18	77.2	89.89	94.29	135.17	71.15	84.32
STM14_1571	ansA	cytoplasmic asparaginase I	1381774	1382790	-	1017	338	84.49	104.26	135.42	115.23	63.84	78.43	84.43	82.43
STM14_1708	ssaL	type III secretion system apparatus protein	1502205	1503221	+	1017	338	6.05	3	17.12	65.52	9.66	3.78	15.1	47.83
STM14_2592	galF	UTP--glucose-1-phosphate uridylyltransferase subunit GalF	2230509	2231531	-	1023	340	532.32	308.76	423.78	284.13	464.67	313.11	336.67	266.04
STM14_5213	yjeK	putative aminomutase	4591372	4592400	-	1029	342	105.94	85.17	99.26	98.1	79.31	57.77	111.3	95.88
STM14_0289	metN	DL-methionine transporter ATP-binding subunit	287723	288754	-	1032	343	48.65	237.73	105.87	104.65	58.3	196.42	101.77	102.85
STM14_2565	hisG	ATP phosphoribosyltransferase	2201032	2202066	+	1035	344	67.16	318.54	851.88	261.45	85.76	185.11	394.59	161.47
STM14_4467	yibD	glycosyl transferase	3915046	3916080	-	1035	344	9.36	39.39	89.06	44.33	19.86	33.88	78.63	42.58
STM14_4484	rfaQ	lipopolysaccharide core biosynthesis protein	3931551	3932585	-	1035	344	93.99	179.53	83	115.44	129.5	154.33	106.98	113.94
STM14_4617	torT	periplasmic sensory protein associated with the TorRS two-component regulatory system	4039024	4040064	-	1041	346	8.99	4.73	7.88	4.78	17.45	14.99	23.62	18.9
STM14_0069	citC2	putative citrate lyase synthetase	68637	69680	+	1044	347	0.43	0.22	0.48	0.15	2.85	3.69	6.25	2.65
STM14_0669	-	putative inner membrane protein	633934	634977	-	1044	347	3.81	2.81	4.49	1.98	5.14	5.73	5.47	2.79
STM14_1359	rluC	23S rRNA pseudouridylate synthase C	1230210	1231253	+	1044	347	132.55	236.23	161.03	158.17	115.26	176.14	169.83	155.03
STM14_3037	ypfG	putative periplasmic protein	2637473	2638516	-	1044	347	21.19	11.9	17	8.88	41.65	14.75	24.21	17.52
STM14_4472	rfaF	ADP-heptose:LPS heptosyltransferase II	3919943	3920989	+	1047	348	86.42	128.57	110.99	98.54	193.16	239.56	189.45	201.17
STM14_3012	eutR	transcriptional regulator EutR	2615612	2616664	-	1053	350	2.74	0.22	3.18	2.18	18.1	5.28	16.9	12.11
STM14_3064	purM	phosphoribosylaminoimidazole synthetase	2664610	2665662	+	1053	350	90.07	297.74	845.91	1196.03	62.79	216.47	542.93	857.35
STM14_3806	-	putative periplasmic ferrichrome-binding protein	3324325	3325377	-	1053	350	2.19	5.79	4.37	2.91	4.81	5.89	8.9	4.34
STM14_0369	dinP	DNA polymerase IV	358485	359540	+	1056	351	6.01	5.1	5.23	6.96	19.46	12.15	18.14	14.17
STM14_1718	ssaU	secretion system apparatus protein SsaU	1510407	1511465	+	1059	352	2.54	1.66	3.32	5.35	5.91	4.64	5.9	9.29
STM14_4857	yiiG	putative cytoplasmic protein	4263947	4265005	+	1059	352	1.76	1.11	1.42	0.58	2.53	1.62	2.95	1.18
STM14_3302	-	integrase-like protein	2898394	2899458	+	1065	354	6.44	0.44	1.65	7.77	6.43	3.01	5.36	9.5
STM14_5467	-	hypothetical protein	4821879	4822943	-	1065	354	14.75	9.02	7.15	11.79	26.01	19.48	25.9	23.16
STM14_4168	yheT	putative hydrolase	3626493	3627560	+	1068	355	80.64	71.2	187.99	79.39	97.89	76.08	180.64	102.63
STM14_4315	yhiI	hypothetical protein	3769394	3770461	-	1068	355	7.99	7.35	6.11	4.66	25.66	30.23	23.79	19.85
STM14_1924	yncB	putative NADP-dependent oxidoreductase	1687073	1688143	-	1071	356	296.14	36.76	232.18	65.08	184.93	34.74	137.38	48.13
STM14_4041	degS	serine endoprotease	3530773	3531843	+	1071	356	47.84	53.6	54.33	47.56	78.7	63.29	98.44	69.35
STM14_4629	recF	recombination protein F	4054991	4056064	-	1074	357	36.12	40.47	32.74	26.96	145.32	134.59	95.13	91.99
STM14_3673	prfB	peptide chain release factor 2	3219885	3220961	-	1077	358	427.39	683.38	450.8	450.03	467.64	597.41	399.26	481.2
STM14_5348	treR	trehalose repressor	4711190	4712266	-	1077	358	18.93	17.84	6.53	13.8	20.19	12.31	10.72	17.11
STM14_0894	-	putative ABC transport protein	834757	835836	+	1080	359	1.84	1.95	0.78	0.85	5.24	4.75	7.67	3.72
STM14_4480	rfaB	UDP-D-galactose:(glucosyl)lipopolysaccharide-1, 6-D-galactosyltransferase	3928226	3929305	-	1080	359	42.93	87.22	44.11	49.15	71.15	96.42	56.36	57.48
STM14_0779	phoL	putative phosphate starvation-inducible protein	733733	734818	-	1086	361	250.25	203.79	158.2	154.74	238.05	162.44	153.38	129.51
STM14_3758	mltC	murein transglycosylase C	3289275	3290360	+	1086	361	97.43	79.29	93.36	105.51	115.19	69.5	91.83	90.59
STM14_4587	-	putative periplasmic protein	4014492	4015577	-	1086	361	12.52	11.11	20.51	13.89	37.85	30.72	49.29	32.41
STM14_4631	dnaN	DNA polymerase III subunit beta	4056212	4057312	-	1101	366	252.95	269.76	228.66	212.94	278.09	246.07	206.2	208.3
STM14_4911	glpX	fructose 1,6-bisphosphatase II	4306805	4307905	-	1101	366	80.14	167.92	110.26	132.45	50.86	94.78	124.39	172.55
STM14_5375	yjgP	putative permease	4735187	4736287	+	1101	366	122.66	148.55	72.55	82.02	225.61	231.31	169.3	140.46
STM14_0577	aes	acetyl esterase	548567	549676	-	1110	369	6.59	3.17	6.79	4.69	18.51	12.52	17.87	12.73
STM14_4764	pldB	lysophospholipase L2	4179455	4180567	+	1113	370	18.49	17.37	23.32	17.14	114.27	94.52	116.94	92.88
STM14_4932	-	putative cytoplasmic protein	4329102	4330226	-	1125	374	6.5	1.98	2.9	6.26	14.56	5.13	11.96	12.19
STM14_0440	ampH	beta-lactamase/D-alanine carboxypeptidase	429548	430678	-	1131	376	47.74	50.76	63.07	77.74	41.08	30.82	67.75	74.13
STM14_3527	nlpD	lipoprotein NlpD	3086786	3087919	-	1134	377	286.59	183.18	281.07	207.15	2356.2	652.24	1502.87	1448.65
STM14_1403	potA	putrescine/spermidine ABC transporter ATPase protein	1270193	1271329	-	1137	378	44.39	131.48	48.67	63.25	64.96	145.37	66.44	77.88
STM14_2613	wza	putative outer membrane polysaccharide export protein	2253064	2254203	-	1140	379	1.41	0.92	1.47	1.95	4.18	1.31	5.48	4.01
STM14_5236	yjeS	putative FeS protein	4610060	4611199	-	1140	379	15.64	24.77	11.46	11.22	73.42	46.7	55.42	31.97
STM14_3992	ispB	octaprenyl diphosphate synthase	3487069	3488214	+	1146	381	208.33	230.03	180.6	209.79	223.51	236.78	219.21	237.84
STM14_0271	lpxB	lipid-A-disaccharide synthase	268488	269636	+	1149	382	49.5	45.78	44.52	47.46	235.89	223.13	169.56	213.47
STM14_1094	ycaD	MFS family transporter	1007967	1009115	+	1149	382	6.25	13.66	16.1	18	9.07	17.49	38.07	30.75
STM14_0795	nagA	N-acetylglucosamine-6-phosphate deacetylase	743414	744568	-	1155	384	116.15	57.72	104.31	76.99	144.92	86.64	125.63	86.86
STM14_1315	mdoC	glucans biosynthesis protein	1193154	1194308	-	1155	384	35.26	15.42	15.3	17.04	35.59	18.7	32.94	28.19
STM14_0921	bioF	8-amino-7-oxononanoate synthase	861548	862705	+	1158	385	1.77	88.53	107.37	87.18	5.14	196.84	147.36	113.44
STM14_0702	ybdL	putative aminotransferase	665585	666745	+	1161	386	11.99	41.37	55.82	51.46	23.09	32.05	48.92	37.72
STM14_1293	-	putative inner membrane protein	1177805	1178965	+	1161	386	13.86	1.21	3.17	3.17	9.24	0.18	2.57	1.55
STM14_3300	-	HlyD family secretion protein	2896630	2897793	+	1164	387	3.14	1.01	1.08	0.99	11.51	5.14	11.21	8.33
STM14_3862	ygiC	putative glutathionylspermidine synthase	3369184	3370347	+	1164	387	278.05	155.61	275.92	185.23	357.2	197.3	382.02	230.71
STM14_4444	mtlD	mannitol-1-phosphate 5-dehydrogenase	3891080	3892243	+	1164	387	137.89	72.27	177.23	140.95	107.98	87.81	104.7	84.17
STM14_5300	-	putative metallo-dependent hydrolase	4665998	4667161	-	1164	387	2.97	1.01	0.72	0.92	6.4	3.86	5.14	2.74
STM14_2668	yehY	putative ABC-type proline/glycine betaine transport system permease component	2310455	2311624	-	1170	389	57.28	1.7	13.88	7.79	181	10.05	77.1	26.29
STM14_3473	prgH	needle complex inner membrane protein	3036579	3037757	-	1179	392	279.57	2.19	3.83	30.53	422.89	11.24	17.4	54.3
STM14_3694	ubiH	2-octaprenyl-6-methoxyphenyl hydroxylase	3237604	3238782	-	1179	392	64.78	46.31	65.62	44.24	242.77	157.79	151.19	136.1
STM14_0884	aroG	phospho-2-dehydro-3-deoxyheptonate aldolase	823985	825166	+	1182	393	348.73	216.87	417.49	393.72	200.32	114.87	237.93	241.74
STM14_2727	setB	proton efflux pump	2359276	2360457	+	1182	393	3.53	9.71	3.33	8.62	5.04	9.95	11.15	10.9
STM14_3395	-	putative inner membrane protein	2979675	2980859	+	1185	394	26.35	9.59	8.62	12.22	23.88	12.27	21.55	19.76
STM14_4586	emrD	multidrug resistance protein D	4013381	4014565	+	1185	394	30.9	39.05	15.19	9.57	69.12	53.95	39.33	21.98
STM14_1840	ydeA	sugar efflux transporter	1608879	1610069	-	1191	396	7.97	26.76	22.07	22.32	14.5	33.75	47.45	30.95
STM14_3305	-	putative cytoplasmic protein	2900669	2901862	+	1194	397	101.56	85.37	62.48	55.94	54.88	50.14	35.05	37.02
STM14_3284	yfjD	hypothetical protein	2873547	2874743	+	1197	398	67.39	51.39	39.8	62.96	109.23	76.1	77.41	93.19
STM14_1013	dacC	D-alanyl-D-alanine carboxypeptidase fraction C	936549	937751	+	1203	400	174.36	54.64	439.5	58.26	163.9	43.37	339.03	54.25
STM14_1139	pncB	nicotinate phosphoribosyltransferase	1055190	1056392	-	1203	400	61.62	409.13	229.81	230.99	76.5	337.19	272.63	271.96
STM14_3319	-	putative hexulose 6 phosphate synthase	2912634	2913836	+	1203	400	82.09	18.41	24.85	49.41	37.88	13.15	19.99	33.98
STM14_0410	-	putative cation efflux pump	397750	398955	-	1206	401	0.11	0.19	0.28	0.19	0	0.35	1.24	1.26
STM14_0744	dacA	D-alanyl-D-alanine carboxypeptidase fraction A	698897	700108	-	1212	403	278.36	330.21	286.96	250.13	233.7	267.11	223.07	231.98
STM14_1018	-	putative transport protein/regulator	941645	942856	-	1212	403	19.68	14.6	18.72	15.29	28.75	24.17	32.73	25.61
STM14_1690	ssaD	virulence protein	1491852	1493063	+	1212	403	5.5	1.55	8.15	17.76	3.93	1.94	6.05	14.18
STM14_2355	tyrP	tyrosine-specific transport protein	2041805	2043016	+	1212	403	16.19	56.74	25.63	95.05	28.51	59.63	53.25	119.71
STM14_2828	yfaW	putative galactonate dehydratase	2449767	2450984	-	1218	405	46.7	6.73	20.14	16.1	31.79	7.02	19.86	14.11
STM14_4175	argD_2	bifunctional N-succinyldiaminopimelate-aminotransferase/acetylornithine transaminase protein	3632315	3633532	-	1218	405	17.53	27.41	57.26	38.3	24.45	27.56	53.65	36.41
STM14_4309	yhhS	hypothetical protein	3761921	3763138	-	1218	405	25.53	16.35	15.6	20.37	71.4	51.61	69.72	54.61
STM14_0581	fsr	putative transport protein	552935	554155	-	1221	406	67.8	55.65	38.06	42.09	37.32	32.92	44.4	35.86
STM14_2601	wcaI	glycosyl transferase	2241492	2242715	-	1224	407	1.05	0.77	2.12	1.63	3.89	4.19	4.88	4.53
STM14_0212	yadE	putative xylanase/chitin deacetylase	210499	211728	+	1230	409	19.08	27.72	26.96	17.25	45.28	43.81	74.45	49.46
STM14_3650	-	putative transport protein	3202332	3203561	+	1230	409	37.12	65.63	17.56	18.87	36.32	54.07	32.36	22.87
STM14_988	moeA	molybdopterin biosynthesis protein MoeA	916763	918004	-	1242	413	111.78	140.74	154.91	141.59	63.55	91.59	76.79	77.65
STM14_1394	ycfW	outer membrane-specific lipoprotein transporter subunit LolE	1262735	1263979	+	1245	414	61.6	51.1	52.86	74.62	116.74	102.36	99.41	109.3
STM14_2450	-	portal protein	2111005	2112249	-	1245	414	1.03	1.32	3.16	5.11	5.98	3.09	23.9	105.18
STM14_0889	-	putative cation transporter	828913	830160	+	1248	415	0.41	0.09	0.2	0.31	0	0.69	1.31	0.44
STM14_4421	avtA	valine--pyruvate transaminase	3866423	3867673	+	1251	416	54.49	180.75	157.88	341.15	38.81	123.24	126.52	234.83
STM14_4724	wzxE	O-antigen translocase	4148486	4149736	+	1251	416	26.66	22.38	17.13	22.22	102.14	93.67	84.71	73.55
STM14_0046	-	putative cytoplasmic protein	42932	44185	+	1254	417	1.79	1.49	1.74	1.22	4.04	3.41	4.44	2.65
STM14_4863	-	putative alcohol dehydrogenase	4267391	4268644	-	1254	417	29.05	7.1	13.62	13.68	34.68	22.85	45.07	25.86
STM14_2147	hemA	glutamyl-tRNA reductase	1885143	1886399	-	1257	418	64.02	53.5	59.95	68.12	168.94	160.07	153.7	152.68
STM14_4715	rho	transcription termination factor Rho	4139275	4140534	+	1260	419	1506.77	1233.81	1325.37	1673.55	826.39	635.04	986.94	1081.3
STM14_4719	wecC	UDP-N-acetyl-D-mannosamine dehydrogenase	4144108	4145370	+	1263	420	184.41	186.45	223.99	147.97	290.53	263.6	278.18	221.85
STM14_4712	rhlB	ATP-dependent RNA helicase RhlB	4137118	4138383	-	1266	421	383.9	346.85	356.52	464.16	342.31	286.79	314.97	387.37
STM14_2422	umuC	DNA polymerase V subunit UmuC	2091297	2092565	-	1269	422	5.91	4.62	6.8	4.04	16.19	7.58	19.06	12.34
STM14_5424	yjiN	putative inner membrane protein	4783517	4784788	-	1272	423	19.11	4.24	11.26	5.18	44.02	9.58	23.39	9.04
STM14_4486	kdtA	3-deoxy-D-manno-octulosonic-acid transferase	3933030	3934307	+	1278	425	69.55	100.2	53.46	64.79	98.12	100.72	160.74	151.15
STM14_2235	yebS	putative inner membrane protein	1956017	1957300	+	1284	427	34.36	20.99	69.25	18.19	52.42	22.48	98.4	27.3
STM14_3329	-	putative inner membrane protein	2923839	2925122	-	1284	427	9.99	4.74	8.22	3.64	8.58	6.49	7.2	4.53
STM14_1556	yeaH	hypothetical protein	1370395	1371681	-	1287	428	50.08	4.01	76.44	23.09	144.87	16.28	195.61	43.71
STM14_2815	-	putative permease	2436737	2438023	-	1287	428	2.39	2.64	1.76	2.38	33.09	31.73	24.39	22.61
STM14_0919	bioA	adenosylmethionine--8-amino-7-oxononanoate transaminase	859135	860424	-	1290	429	5.17	214.52	181.53	139.17	6.23	145.2	136.92	93.99
STM14_4111	sun	16S rRNA methyltransferase B	3592318	3593607	+	1290	429	94.5	92.91	53.54	134.13	93.74	74.26	50.24	96.46
STM14_0278	tilS	tRNA(Ile)-lysidine synthetase	279375	280667	+	1293	430	56.04	46.39	58.02	41.35	116.33	66.15	62.94	46.08
STM14_2582	rfbX	putative O-antigen transferase	2220177	2221469	-	1293	430	120.17	136.19	90.72	95.43	127.61	155.78	99.61	113.82
STM14_3493	invC	ATP synthase SpaL	3056914	3058209	-	1296	431	86.94	4.16	6.27	14.95	283.13	10.72	9.64	36.57
STM14_5248	purA	adenylosuccinate synthetase	4621926	4623224	+	1299	432	561.09	1134.62	920.52	1891.47	523.46	947.17	872.28	1438.41
STM14_1774	rstB	sensor protein RstB	1556382	1557683	-	1302	433	9.8	7.47	16.91	11.88	14.87	8.54	23.27	15.96
STM14_3878	ygiF	putative cytoplasmic protein	3385254	3386555	-	1302	433	123.62	118.78	142.56	112.89	84.64	80.8	65.95	53.11
STM14_4928	metB	cystathionine gamma-synthase	4323157	4324458	+	1302	433	12.81	26.64	51.64	33.83	48.95	82.77	63.34	51.62
STM14_0578	gsk	inosine-guanosine kinase	549691	550995	+	1305	434	107.66	189.43	86.1	154.24	76.46	118.14	80.16	107.46
STM14_1392	ycfU	outer membrane-specific lipoprotein transporter subunit LolC	1260731	1262041	+	1311	436	122.14	83.83	73.38	88.74	131.54	102.59	99.07	91.22
STM14_5099	-	conjugative transfer protein	4476104	4477414	+	1311	436	54.93	3.31	13.22	4.38	68.84	10.6	31.82	13.64
STM14_0612	allP	allantoin permease	583260	584573	+	1314	437	0.39	0.27	0.38	0.23	1.13	0.49	1.76	0.74
STM14_2942	fadL	long-chain fatty acid outer membrane transporter	2553941	2555254	+	1314	437	1067.07	848.74	323.94	404.59	640.11	515.37	196.35	236.12
STM14_5501	nadR	nicotinamide-nucleotide adenylyltransferase	4848561	4849874	+	1314	437	82.09	93	106.92	59.92	156.17	125.79	135.55	108.83
STM14_3827	metC	cystathionine beta-lyase	3339111	3340433	+	1323	440	42.31	20.19	46.2	47.82	30.84	16.65	45.49	32.99
STM14_4344	yhjE	putative transport protein	3796753	3798075	+	1323	440	16.72	23.38	56.89	70.51	29.04	19.23	83.59	71.96
STM14_996	yliG	putative FeS oxidoreductase	924581	925906	-	1326	441	99.24	460.95	175.91	230.18	43.8	132.55	115.58	137.63
STM14_2170	-	putative glutamic dehyrogenase-like protein	1904220	1905545	+	1326	441	6577.65	307.13	560.25	563.47	2985.37	178.03	264.86	309.85
STM14_3607	argA	N-acetylglutamate synthase	3162651	3163982	+	1332	443	6.07	4.4	21.62	13.28	14.31	8.99	31.42	17.89
STM14_3384	-	putative regulatory protein	2969966	2971300	-	1335	444	13.31	12.02	11.92	5.97	25.88	15.22	22.59	14.12
STM14_0384	-	putative permease	371989	373326	+	1338	445	1.82	0.35	0.69	0.4	5.12	0.96	1.93	1.24
STM14_4619	dgoT	D-galactonate transport protein	4042905	4044242	-	1338	445	2.06	0.18	1.5	1.72	3.56	3.04	4.87	4.45
STM14_2437	-	hypothetical protein	2101419	2102759	-	1341	446	3.16	1.49	5.49	7.65	11.77	6.86	22.49	112.43
STM14_4772	-	putative arylsulfatase regulator	4186061	4187404	+	1344	447	5.3	5.67	5.92	3.25	36.57	9.07	19.21	11.65
STM14_3077	xseA	exodeoxyribonuclease VII large subunit	2677631	2678980	+	1350	449	70.35	88.69	88.81	53.44	66.63	62.09	99.43	57.89
STM14_3850	ygiY	sensor protein QseC	3359706	3361055	+	1350	449	11.59	6.77	18.98	13.5	21.18	14.73	28.08	20.84
STM14_5329	pmbA	peptidase PmbA	4694659	4696011	+	1353	450	199.3	200.29	228.52	176.96	142.65	103.04	141.28	118.91
STM14_3250	pssA	phosphatidylserine synthase	2846489	2847844	+	1356	451	211.86	192.07	172.51	128.5	251.28	169.52	199.28	166.37
STM14_5106	tyrB	aromatic amino acid aminotransferase	4482683	4484038	+	1356	451	112.41	71.37	160.97	190.52	101.7	71.12	118.43	154.92
STM14_0150	murF	UDP-N-acetylmuramoyl-tripeptide--D-alanyl-D- alanine ligase	145675	147033	+	1359	452	201.86	143.28	180.82	211.01	301.35	227.05	235.83	239.31
STM14_2560	yeeF	putative amino acid transport protein	2197379	2198743	-	1365	454	189.47	1399.14	372.8	490.87	194.41	1628.7	525.63	556.32
STM14_0305	dniR	membrane-bound lytic murein transglycosylase D	300623	301990	-	1368	455	207.66	157.07	169.47	156.15	430	359.2	427.45	373.07
STM14_1225	yccW	putative SAM-dependent methyltransferase	1129090	1130457	-	1368	455	58.92	194.15	76.81	93.11	35.05	76.28	50.85	59.16
STM14_2230	-	putative transport protein	1950043	1951416	+	1374	457	19.56	6.4	4.57	5.8	10.4	6.23	11.17	8.57
STM14_4881	cpxA	two-component sensor protein	4281960	4283333	-	1374	457	70.52	69.24	57.22	41.2	201.81	173.83	211.11	126.07
STM14_4112	trkA	potassium transporter peripheral membrane component	3593629	3595005	+	1377	458	59.94	55.73	48.03	87.61	85.44	73.45	59.1	92.08
STM14_2887	ulaA_2	ascorbate-specific PTS system enzyme IIC	2506474	2507871	-	1398	465	343.66	2.18	6.65	8.05	806.39	9.94	13.99	10.9
STM14_5182	-	hypothetical protein	4570010	4571410	-	1401	466	0.78	0.75	1.25	0.6	7.87	1.98	8.82	4.45
STM14_3896	oat	putrescine--2-oxoglutarate aminotransferase	3402931	3404337	+	1407	468	62.39	1.67	40.17	17.31	47.63	3.34	36.31	14.58
STM14_1672	pykF	pyruvate kinase	1469902	1471314	-	1413	470	610	780.98	898.81	718.66	258.21	295.55	406.91	316.66
STM14_2627	mdtD	multidrug efflux system protein YegB	2273278	2274690	+	1413	470	6.94	3.15	4.15	3.36	16.86	8.32	36.73	8.14
STM14_5104	dnaB	replicative DNA helicase	4480133	4481548	+	1416	471	60.96	81.09	56.76	65.88	122.84	152.37	100.17	118.12
STM14_0218	pcnB	poly(A) polymerase I	214578	215996	-	1419	472	242.81	280.89	181.43	243.22	259.22	284.65	228.73	272.06
STM14_0243	yadQ	chloride channel protein	239365	240786	+	1422	473	34	29.83	18.02	20.63	54.46	35.94	40.32	35.96
STM14_2138	ychP	hypothetical protein	1877411	1878835	-	1425	474	18.27	7.65	12.87	9.41	58.73	20.26	46.72	37.83
STM14_2414	dcm	DNA cytosine methylase	2085734	2087164	-	1431	476	40.42	34.06	47.63	50.1	50.99	34.22	67.22	61.2
STM14_5172	melB	melibiose:sodium symporter	4557379	4558809	+	1431	476	2.82	0.82	0.99	1.02	5.41	3.59	6.08	3.29
STM14_5488	deoA	thymidine phosphorylase	4835059	4836489	+	1431	476	123.59	19.65	83.9	25.53	136.95	40.35	83.17	43.48
STM14_3986	dacB	D-alanyl-D-alanine carboxypeptidase/endopeptidase	3482549	3483982	+	1434	477	77.45	62.75	65.68	60.46	112.37	74.26	97.4	80.3
STM14_4008	rpoN	RNA polymerase factor sigma-54	3498306	3499739	+	1434	477	71.46	46.98	71.99	73.12	261.08	197.13	280.63	209.69
STM14_2679	yohG	multidrug resistance outer membrane protein MdtQ	2320382	2321818	-	1437	478	0.8	1.3	0.93	0.69	6.01	4.91	6.62	3.09
STM14_2237	yebU	rRNA (cytosine-C(5)-)-methyltransferase RsmF	1959980	1961419	+	1440	479	30.95	69.08	40.12	66.27	40.13	56.13	52.74	58.8
STM14_2358	-	putative cell wall-associated hydrolase	2044533	2045972	-	1440	479	14.29	7.08	108.73	9.36	15.93	14.11	115.11	14.72
STM14_3921	yhaO	putative transport protein	3421604	3423043	-	1440	479	4.23	2.6	2.67	1.28	6	4.75	12.45	5.29
STM14_3143	yfhK	putative sensor kinase	2757727	2759169	-	1443	480	26.13	19.49	25.12	19.32	59.24	36.75	61.29	41.39
STM14_0503	thiI	thiamine biosynthesis protein ThiI	478561	480009	+	1449	482	137.19	258.33	109.96	173.59	117.99	165.72	86.73	116.19
STM14_2500	yeeO	hypothetical protein	2145928	2147385	-	1458	485	17.02	4.98	9.47	6.25	30.85	10.85	14.91	11.31
STM14_1408	phoQ	sensor protein PhoQ	1276100	1277563	-	1464	487	65.62	49.14	178.09	49.07	218.29	138.61	662.33	134.22
STM14_4646	yieG	putative xanthine/uracil permease family protein	4071427	4072890	-	1464	487	52.12	252.57	171.22	274.41	54.73	206.38	206.21	279.51
STM14_0155	murC	UDP-N-acetylmuramate--L-alanine ligase	151855	153330	+	1476	491	208.41	207.41	214.7	208.97	286.74	232.08	245.49	236.3
STM14_0524	ampG	muropeptide transporter	499293	500768	-	1476	491	31.54	48.5	33.13	33.47	91.21	98.8	104.29	91.07
STM14_5014	hydH	sensor protein ZraS	4401933	4403414	+	1482	493	20.99	14.39	10	9.66	72.15	49.49	36.67	29.83
STM14_1314	ymdC	putative phospholipase	1191650	1193137	+	1488	495	29.78	6.54	16.04	9.42	81.67	22.7	48.48	28.4
STM14_1689	ssaC	outer membrane secretin precursor	1490378	1491871	+	1494	497	2.36	0.86	4.03	10.46	3.39	0.86	5	9
STM14_3164	gogB	leucine-rich repeat-containing protein	2780529	2782022	+	1494	497	48.03	15.14	122.11	36.5	26.12	7.59	71.75	21.61
STM14_4318	pitA	low-affinity phosphate transporter	3772194	3773690	+	1497	498	119.94	254.9	94.91	179.43	212.49	426.23	241.23	313.24
STM14_4570	uhpB	sensory histidine kinase UhpB	4002744	4004246	-	1503	500	5.85	11.22	6.35	9.68	36.46	49.79	40.32	38.35
STM14_1317	mdoG	glucan biosynthesis protein G	1194580	1196115	+	1536	511	265.61	330.35	310.59	262.04	238.51	264.92	253.77	218.77
STM14_3067	ppx	exopolyphosphatase	2668560	2670101	+	1542	513	127.71	52.12	104.09	77.83	162.05	61.85	118.77	91.48
STM14_5054	-	putative inner membrane protein	4437985	4439532	-	1548	515	22.99	28.15	10.82	17.76	26.74	34.81	22.64	23.45
STM14_1863	pqaA	PhoPQ-regulated protein	1629760	1631316	-	1557	518	4.24	1.13	106.9	3.2	4.59	1.65	75.57	2.58
STM14_3547	-	putative cytoplasmic protein	3102648	3104204	-	1557	518	7	2.78	5.16	3.54	11.09	3.98	8.64	6.14
STM14_4248	-	putative periplasmic phosphate-binding protein	3704539	3706098	-	1560	519	9.54	7.21	7.89	3.49	34.75	16.59	27.96	17.23
STM14_0042	-	putative 5'-nucleotidase	37103	38674	-	1572	523	2.98	2.61	4.58	1.8	17.05	9.66	23.16	9.78
STM14_4362	yhjS	putative cytoplasmic protein	3818365	3819936	+	1572	523	85.34	45.24	50.92	32.6	114.63	52.23	63.26	43.9
STM14_972	ybiP	putative integral membrane protein	901164	902744	-	1581	526	15.53	48.09	17.79	21.61	19.4	42.33	28.19	28.05
STM14_3189	-	head-tail preconnector-like protein	2805357	2806937	-	1581	526	0.57	1.26	0.37	1.74	16.01	3.11	10.31	12.53
STM14_5478	prfC	peptide chain release factor 3	4826721	4828310	+	1590	529	212.26	444.47	215.52	317.93	158.1	299.09	144.07	202.72
STM14_0829	ybgH	POT family transport protein	776735	778330	-	1596	531	5.02	10.28	3.41	19.58	16.98	14.07	13.62	22.66
STM14_4676	yieN	regulatory ATPase RavA	4101443	4103047	-	1605	534	46.71	25.62	69.9	34.55	86.29	39.17	103.95	54.82
STM14_0063	-	putative transcriptional regulator	61794	63413	-	1620	539	4.39	2.82	6.98	2.08	16.18	7.92	35.73	10.52
STM14_3237	nadB	L-aspartate oxidase	2834262	2835884	+	1623	540	6.4	171.73	66.08	105.71	19.82	139.39	60.94	90.42
STM14_0429	prpR	prp operon regulator	416780	418405	-	1626	541	11.91	1.3	6.38	2.68	30.77	3.42	16.79	7.67
STM14_3477	sptP	protein tyrosine phosphatase/GTPase activating protein	3042308	3043939	-	1632	543	156.23	161.74	136.1	148.35	122.09	131.28	100.56	117.51
STM14_5400	yjhP	putative SAM-dependent methyltransferase	4766774	4768405	-	1632	543	39.76	13.35	23.44	20.79	25.55	12.32	20.73	16.22
STM14_5259	aidB	isovaleryl CoA dehydrogenase	4632426	4634066	+	1641	546	24.78	1.78	6.38	5.55	56.45	5.6	14.65	10.72
STM14_2793	yojI	multidrug transporter membrane component/ATP-binding component	2412315	2413958	-	1644	547	43.96	29.29	52.61	44.4	57.25	35.12	81.32	57.91
STM14_2042	sapA	peptide transport protein	1794368	1796017	+	1650	549	37.7	47.72	40.75	40.2	57.04	53.26	55.25	51.31
STM14_0650	-	putative inner membrane protein	615498	617150	-	1653	550	13.38	43.87	8.97	19.18	8.11	30.66	7.81	14.75
STM14_2154	ychM	putative sulfate transporter YchM	1889546	1891207	+	1662	553	35.46	27.7	18.03	39.22	55.37	38.85	32.53	57.95
STM14_1110	rpsA	30S ribosomal protein S1	1024150	1025823	+	1674	557	5204.16	11056.9	6160.78	7038.54	3795.96	8145.69	4150.53	5729.11
STM14_0767	hscC	putative heatshock protein	723030	724709	-	1680	559	7.79	1.81	2.44	4.51	21.45	4.58	12.86	9.57
STM14_0708	ahpF	alkyl hydroperoxide reductase F52a subunit	671831	673513	+	1683	560	130.16	140.41	141.83	142.26	110.08	106.6	100.34	92.22
STM14_1021	-	hypothetical protein	943761	945446	-	1686	561	42.03	73.31	32.63	49.02	56.35	85.86	66.56	73.48
STM14_3497	invG	outer membrane secretin precursor	3061834	3063522	-	1689	562	199.9	1.39	2.23	19.86	226.95	3.42	5.79	24.53
STM14_0540	ybaE	putative ABC transporter periplasmic binding protein	513124	514824	-	1701	566	6.82	3.03	6.3	6.93	16.81	6.03	17.89	12.79
STM14_2209	-	putative diguanylate cyclase/phosphodiesterase	1936181	1937884	+	1704	567	1.77	0.48	3.34	0.63	14.51	3.64	19.22	8.29
STM14_5199	dipZ	thiol:disulfide interchange protein precursor	4580213	4581916	-	1704	567	52.91	31.63	40.68	45.58	49.99	29.74	59.8	57.66
STM14_1775	-	putative periplasmic protein	1557794	1559500	-	1707	568	2.67	0.41	3.68	1.93	2.09	0.88	4.93	3.08
STM14_2452	-	terminase large subunit	2112440	2114173	-	1734	577	2.29	1.42	4.1	11.84	7.73	5.92	21.16	93.1
STM14_3674	recJ	ssDNA exonuclease RecJ	3221088	3222821	-	1734	577	72.41	53.72	70.49	67.05	178.81	111.11	120.66	128.66
STM14_1113	msbA	lipid transporter ATP-binding/permease protein	1028794	1030542	+	1749	582	123.96	155.88	83.44	124.55	137.94	163.83	139.59	148.08
STM14_1101	ycaO	putative cytoplasmic protein	1017059	1018819	-	1761	586	89.76	249.16	169.21	220.17	53.28	147.65	108.94	108.59
STM14_1212	lonH	putative protease	1116839	1118599	-	1761	586	127.52	129.93	70.94	129.35	170.15	170.12	120.97	170.6
STM14_2748	yejH	putative ATP-dependent helicase	2376101	2377861	+	1761	586	16.75	16.5	13.45	14.09	23	20.04	24.84	23.13
STM14_2754	yejM	putative hydrolase	2380473	2382233	+	1761	586	49.78	40.92	34.33	47.93	111.97	83.3	102.3	112.13
STM14_0853	sdhA	succinate dehydrogenase flavoprotein subunit	799219	800985	+	1767	588	2521.36	339.28	862.31	1515.78	2310.08	309.31	545.6	1057.75
STM14_1079	cydD	cysteine/glutathione ABC transporter membrane/ATP-binding component	991677	993443	-	1767	588	66.27	75.39	63.63	81.84	58.15	59.3	88.65	95.67
STM14_2663	yehU	putative sensor kinase	2306013	2307800	-	1788	595	20.34	18.22	17.93	28.44	53.64	32.65	44.38	57.66
STM14_3163	lepA	GTP-binding protein LepA	2778325	2780124	-	1800	599	277.52	471.31	295.27	323.95	269.55	370.99	256.86	214.55
STM14_3042	narQ	nitrate/nitrite sensor protein NarQ	2643176	2645014	+	1839	612	2.58	1.78	2.6	2.21	9.88	4.3	11.6	8.29
STM14_4761	recQ	ATP-dependent DNA helicase RecQ	4176249	4178096	+	1848	615	28.91	40.38	33.25	36.47	120.07	128.55	103.07	103.55
STM14_4677	trkD	potassium transport protein Kup	4103287	4105155	+	1869	622	36.68	46.95	22.71	32.87	62.15	76.54	51.1	49.16
STM14_3328	-	putative inner membrane protein	2921705	2923579	+	1875	624	6.94	3.31	5.18	3.76	4.61	2.62	6.3	5.1
STM14_2334	cheM	methyl accepting chemotaxis protein II	2026160	2028052	-	1893	630	214.7	78.29	0.18	6.88	279.9	101.32	4.95	12.44
STM14_3854	parE	DNA topoisomerase IV subunit B	3362214	3364106	-	1893	630	211.76	198.18	186.51	219.42	230.19	200.05	177.13	209.14
STM14_0845	-	putative glycosyl transferase	792273	794168	+	1896	631	3.86	2.35	4.72	5.98	2.83	1.47	3.73	4.53
STM14_0572	htpG	heat shock protein 90	544596	546494	+	1899	632	490.12	1304.25	608.29	396.64	408.1	819.62	372.67	268.68
STM14_0748	mrdA	penicillin-binding protein 2	702519	704420	-	1902	633	27.61	35.97	19.32	27.22	69.84	89.15	64.65	65.28
STM14_4164	yheS	putative ABC transporter ATP-binding protein	3623691	3625598	+	1908	635	47.59	56.06	59.72	57	71.34	72.28	90.08	81.49
STM14_2056	rnb	exoribonuclease II	1805035	1806969	+	1935	644	287.26	406.03	415.9	541.77	193.64	269.52	308.45	352.84
STM14_4058	yhcP	p-hydroxybenzoic acid efflux subunit AaeB	3543899	3545866	-	1968	655	4.11	4.58	2.34	1.17	14.83	13.8	14.5	8.1
STM14_4353	yhjK	putative phosphodiesterase	3805415	3807388	-	1974	657	20.95	24.93	15.48	19.32	41.95	39	39.57	31.94
STM14_3888	rpoD	RNA polymerase sigma factor RpoD	3394519	3396501	+	1983	660	539.27	691.91	552.12	506.68	489.64	592.75	441.16	416.06
STM14_2982	ligA	NAD-dependent DNA ligase LigA	2590553	2592568	-	2016	671	125.55	141.28	131.36	125.07	117.16	130.78	92.33	100.01
STM14_3048	ypfI	putative acetyltransferase	2650628	2652646	-	2019	672	12.77	8.24	12.03	12.29	72.14	42.15	53.16	53.81
STM14_2658	metG	methionyl-tRNA synthetase	2301292	2303325	+	2034	677	336.27	344.05	277.48	397.16	183.04	210.99	183.69	213.31
STM14_2284	ptrB	protease 2	1983210	1985261	-	2052	683	111.44	13.7	63.94	44.94	92.75	18.76	64.69	43.96
STM14_3308	-	putative inner membrane protein	2903726	2905795	+	2070	689	0.62	0.06	0.49	0.41	4.89	2.38	5.38	4.15
STM14_4174	yhfK	putative inner membrane protein	3630185	3632272	+	2088	695	48.19	24.86	21.37	33.01	131.66	67.9	77.82	82.56
STM14_0426	foxA	ferrioxamine receptor	413356	415464	+	2109	702	3.1	0.94	6.99	3.01	11.3	4.46	17.59	8.74
STM14_1204	ycbY	23S rRNA m(2)G2445 methyltransferase	1108229	1110337	+	2109	702	119.77	160.49	122.47	140.77	117.92	154.52	99.72	102.3
STM14_4507	spoT	bifunctional (p)ppGpp synthetase II/ guanosine-3',5'-bis pyrophosphate 3'-pyrophosphohydrolase	3947762	3949873	+	2112	703	72.6	102.07	81.03	97.45	357.21	498.93	337.02	311.46
STM14_1920	yncD	putative outer membrane receptor	1683887	1686007	+	2121	706	92.18	5.47	39.04	12.39	57.85	6.35	36.7	14.11
STM14_5155	fdhF	formate dehydrogenase	4538892	4541039	-	2148	715	2.54	0.49	5.3	6.2	21.35	14.63	20.68	17.22
STM14_4752	uvrD	DNA-dependent helicase II	4169232	4171394	+	2163	720	54.88	68.36	45.87	57.65	75.87	96.39	61.05	73.55
STM14_3348	iroN	outer membrane receptor FepA	2943824	2946004	-	2181	726	8.94	1.99	8.79	18.3	12.56	3.33	17.01	16.27
STM14_3620	ptsP	fused phosphoenolpyruvate-protein phosphotransferase PtsP/GAF domain-containing protein	3179718	3181964	-	2247	748	54	31.7	42.29	45.68	195.64	102.97	136.23	130.8
STM14_1112	ycaI	hypothetical protein	1026487	1028757	+	2271	756	1.44	0.88	3.06	1.15	6.03	4.43	9.09	5.13
STM14_5169	adi	catabolic arginine decarboxylase	4552239	4554509	-	2271	756	6.07	2.12	5.09	3.2	10.62	7.44	13.76	9.58
STM14_4357	yhjN	cellulose synthase regulator protein	3812232	3814532	-	2301	766	214.26	83.35	103.77	93.67	192.74	79.55	82.31	75.22
STM14_3104	pbpC	penicillin-binding protein 1C	2716999	2719314	-	2316	771	6.42	2.93	3.72	4.56	33.18	13.57	21.88	19.8
STM14_4789	fadB	multifunctional fatty acid oxidation complex subunit alpha	4203001	4205316	-	2316	771	626.48	8.09	33.26	41.01	652.14	13.94	30.04	32.91
STM14_4219	yhgF	putative RNase R	3675024	3677351	+	2328	775	236.78	233.41	226.57	218.2	157.24	170.11	156.17	148.04
STM14_0112	imp	organic solvent tolerance protein	106522	108882	-	2361	786	260.44	247.02	271.31	314.74	276.4	228.86	301.13	265.11
STM14_3103	-	putative anaerobic dimethylsulfoxide reductase	2714465	2716870	-	2406	801	2.64	3.46	1.67	2.8	5.57	4.8	5.59	5.53
STM14_0266	yaeT	outer membrane protein assembly factor YaeT	263084	265498	+	2415	804	551.14	509.54	667.33	636.15	664.25	568.26	668.62	638.81
STM14_3657	stdB	putative outer membrane usher protein	3208362	3210851	-	2490	829	0.1	0.05	0.17	0.18	3.11	1.2	3.66	3.01
STM14_0354	safC	putative fimbrial usher	344251	346761	+	2511	836	4.78	2.61	4.67	2.62	21.35	12.6	17.91	13.85
STM14_1318	mdoH	glucosyltransferase MdoH	1196108	1198651	+	2544	847	157.17	138.3	131.38	146.26	233.1	223.75	210.42	199.74
STM14_4205	mrcA	peptidoglycan synthetase	3660524	3663100	+	2577	858	50.61	98.16	65.56	90.83	76.97	112.43	99.17	119.64
STM14_0030	bcfC	fimbrial usher	25803	28424	+	2622	873	1	0.76	1.15	0.67	7.04	5.14	7.1	5.02
STM14_2236	-	putative inner membrane protein	1957263	1959902	+	2640	879	67.41	32.75	73	35.6	80.89	38.96	113.06	47.45
STM14_4954	ppc	phosphoenolpyruvate carboxylase	4348838	4351489	-	2652	883	143.83	139.91	331.36	389.2	113.21	115.7	251.9	257.24
STM14_0254	glnD	PII uridylyl-transferase	250848	253520	-	2673	890	21.81	15.87	20.27	24.59	48.36	42.16	47.37	47.9
STM14_4234	malT	transcriptional regulator MalT	3690798	3693503	+	2706	901	145.17	64.38	25.74	42.46	333.28	126.99	57.89	77.38
STM14_0667	-	putative inner membrane protein	630024	632753	+	2730	909	9.02	2.36	5.49	4.88	30	7.44	24.39	12.54
STM14_4618	torS	hybrid sensory histidine kinase TorS	4040144	4042879	+	2736	911	3.16	4.2	2.48	2.27	13.72	13.44	12.46	10.84
STM14_1199	pepN	aminopeptidase N	1102354	1105098	+	2745	914	375.79	110.5	220.89	236.06	219.83	82.26	118.94	120.9
STM14_4550	-	putative transcriptional regulator	3986241	3989039	-	2799	932	22.29	11.3	20.19	20.41	43.52	21.93	39.46	33.67
STM14_0756	-	hypothetical protein	709621	712446	-	2826	941	383.15	492.44	424.07	521.49	251.68	321.95	261.1	322.4
STM14_0418	res	DNA restriction enzyme	405989	408964	+	2976	991	60.72	57.01	53.48	54.36	73.16	71.2	61.17	63.61
STM14_1894	fdnG	formate dehydorgenase-N alpha subunit	1660419	1663466	-	3048	1015	8.25	2.84	9.31	28.85	22.57	9.61	24.78	48.42
STM14_4852	fdoG	formate dehydrogenase alpha subunit	4258342	4261392	-	3051	1016	270.69	69.35	408.8	616.68	586.31	116.48	568.21	796.05
STM14_0563	aefA	potassium efflux protein KefA	535220	538582	+	3363	1120	59.3	67.97	53.87	67.46	84.49	88.19	94.98	89.29
STM14_1475	-	host specificity protein	1322806	1326168	+	3363	1120	0.19	0.14	0.17	0.27	1.86	1.65	1.82	1.19
STM14_3172	-	host specificity protein-J-like protein	2788962	2792324	-	3363	1120	0.23	0.24	0.2	0.46	1.68	0.76	3.76	3.13
STM14_1391	mfd	transcription-repair coupling factor	1257058	1260504	-	3447	1148	84.83	72.8	81.76	100.72	90.03	77.48	83.56	84.9
STM14_4355	yhjL	cellulose synthase subunit BcsC	3807595	3811137	-	3543	1180	63.71	21.46	32.07	24.84	138.71	46.71	55.56	46.39
STM14_5297	ytfN	putative periplasmic protein	4660613	4664392	+	3780	1259	44.21	38.59	66.62	44.5	107.63	88.81	173.06	101.22
STM14_5035	metH	B12-dependent methionine synthase	4421773	4425561	+	3789	1262	68.41	33.36	98.26	74.33	64.22	39	79.14	65.98
STM14_3083	ratA	putative outer membrane protein	2693427	2699024	-	5598	1865	2.83	1.3	2.86	1.4	19.47	6.76	15.14	9.85
STM14_4188	bigA	putative surface-exposed virulence protein	3643029	3648923	+	5895	1964	0.61	0.48	0.97	0.52	5.86	3.88	8.09	5.24
STM14_3078	shdA	AIDA autotransporter-like protein	2679142	2685111	-	5970	1989	0.32	0.26	0.6	0.24	6.59	3.55	7.58	5.13
