# Supplementary material for: Identification of Unannotated Small Genes in Salmonella
Source: G3 (Bethesda). 2017 Jan 25;7(3):983–9. doi: 10.1534/g3.116.036939 (PMC5345727; doi:10.1534/g3.116.036939)
Supplement: Supplementary file 7 [file 983TableS9.xlsx]

## Sheet: Table S9
Table S9 List of 139 mis-annotated genes in strain 14028s
man-# (mis-annotation)	Locus tag	Coordinate (left)	Coordinate (right)	Strand	Annotated length (nt)	Corrected length (nt)	nt sequence	Corrected length (aa)	aa sequence	SignalP4.1	Conservation checked by EcoGene3.0 (EcoBlast)	Ribosome density (RPKM) in LB	Ribosome density (RPKM) in RDM	Ribosome density (RPKM) in low Mg2+ (10 µM)	Ribosome density (RPKM) in low pH (5.8)	mRNA density (RPKM) in LB	mRNA density (RPKM) in RDM	mRNA density (RPKM) in low Mg2+ (10 µM)	mRNA density (RPKM) in low pH (5.8)
man-1	STM14_0383	371448	371747	+	324	300	ATGCCAACAGCAATTGAGAAAGCCTTGGATTTTATTGGTGGTATGAACACATCGGCGTCAGTACCCCATTCAATGGATGAAAGTACCGCTAAGGGAATTTTAAAGTATTTGCATGATTTAGGCGTGCCAGTAAGCCCGGAAGTTGTGGTGGCACGAGGTGAGCAGGAGGGATGGAATCCTGAGTTCACGAAAAAAGTGGCCGGATGGGCAGAAAAAGTCGCCTCCGGTAACCGCATCCTTATCAAAAACCCAGAGTATTTTTCGACCTATATGCAGGAGCAGCTCAAAGAACTCGTGTGA	99	MPTAIEKALDFIGGMNTSASVPHSMDESTAKGILKYLHDLGVPVSPEVVVARGEQEGWNPEFTKKVAGWAEKVASGNRILIKNPEYFSTYMQEQLKELV	N	Conserved in Enterobacteriaceae	28699.5	5045.83	14389.5	20329.3	19966.8	2441.48	5912.93	13278.4
man-2	STM14_0398	386294	387028	+	765	735	ATGAATGAAACTATATTTTTACTTGATAAGCGTGTTGTATTTGATAGTACGAAGATGACCTTATCGCATGGTAATGAGATAATCAGAATATCAGAAGCTGAGACCCATCTGCTTCTTGCTTTTTGGCATGGTCTTTACAAAAAAGAAGATATTATTCATTTTGTTTGGGAAAATCGTGGAGGCTGCGTCTCAGAATCAAGTTACTATAAACTCATTAATCAAATGAGAAATGATTTTAGTAGCATTGGTCTACAGTCATCTGACATCGTAACTCGCCCTCGGGTGGGGGTATCGCTGTCTGTTGCCATTGAACCTATAAAAAAAATCACCTCCCTAAAGGTGAGTGATGAAAACGTTAAAGGCACCACGACTCGGGAGAACATATTTTACAAAAATAAA…	244	MNETIFLLDKRVVFDSTKMTLSHGNEIIRISEAETHLLLAFWHGLYKKEDIIHFVWENRGGCVSESSYYKLINQMRNDFSSIGLQSSDIVTRPRVGVSLSVAIEPIKKITSLKVSDENVKGTTTRENIFYKNKRHSVFVVLTGAILLALLYGVFTIYKAPVRNSPDSFFTYLGEYNDYAIYKTKEDKVTLSEVVFAFNSLKIKIYRQNGRHLYYIREPNMNIFLQCLNPVEMAVPKCITVKERY	N	Conserved in Enterobacteriaceae	1167.16	405.5	336.82	309.13	1624.86	472.04	355.35	667.93
man-3	STM14_0424	411869	412000	+	225	132	ATGGTTAAAGTGAAAAAATGGTCGCGGCGAGTCGTATGGATGGTCGCGATATGGTGCGCCAGCGTGCTTCTGCTGGCGGGCGTCGGAATGTTATTCAGACTGCTCATGACCTCCGCAGGATTTCGCTCCTGA	43	MVKVKKWSRRVVWMVAIWCASVLLLAGVGMLFRLLMTSAGFRS	N	Conserved in Enterobacteriaceae	2839.88	534.77	2930.4	996.54	6361.55	1898.28	6100.91	2337.74
man-4	STM14_0452	437798	438058	+	267	261	ATGAAAAATCTCATAGCAGAGTTGTTGCTTAAGCTAGCCCAAAAAGAAGAAGAGTCGAAAGAACTGGTTGCTCAGGTAGAAGCGTTAGAGATTATCGTCACAGCAATGTTACGTAACATGGCGCAAAACGAGCAGGAGATGTTGATACGTCAGGTAGAGGGGGCACTTGAAGGCGTAAAGCCGGATGCCAGCGTTCCTGATCACGATACGGAATTGCTGCGCCAATATGTAAAAAAGTTGCTGAGACACCCCCGGCACTAA	86	MKNLIAELLLKLAQKEEESKELVAQVEALEIIVTAMLRNMAQNEQEMLIRQVEGALEGVKPDASVPDHDTELLRQYVKKLLRHPRH	N	Conserved in Enterobacteriaceae	10523.4	8414.23	107142	10904.6	8007.59	7163.46	116165	10909.4
man-5	STM14_0489	468230	469093	-	969	864	ATGAAAAAAACTTTACTCGCAGTCAGCGCAGCGCTGGCGCTCACCTCATCTTTTACTGCTAACGCAGCAGAAAATGATCAGCCGCAGTATTTGTCCGACTGGTGGCACCAGAGCGTAAACGTGGTAGGCAGCTACCATACCCGTTTCTCGCCGAAATTGAACAACGACGTCTATCTGGAATATGAAGCATTTGCCAAAAAAGACTGGTTTGATTTCTACGGCTATATCGATATTCCCAAAACCTTTGATTGGGGTAACGGCAACGATAAAGGTATCTGGTCCGACGGTTCTCCGCTGTTCATGGAAATCGAACCGCGTTTCTCAATTGATAAGCTGACCGGCGCAGACCTGAGCTTCGGCCCGTTTAAAGAGTGGTATTTCGCCAACAACTACATCTAC…	287	MKKTLLAVSAALALTSSFTANAAENDQPQYLSDWWHQSVNVVGSYHTRFSPKLNNDVYLEYEAFAKKDWFDFYGYIDIPKTFDWGNGNDKGIWSDGSPLFMEIEPRFSIDKLTGADLSFGPFKEWYFANNYIYDMGDNKASRQSTWYMGLGTDIDTGLPMGLSLNVYAKYQWQNYGASNENEWDGYRFKVKYFVPITDLWGGKLSYIGFTNFDWGSDLGDDPNRTSNSIASSHILALNYDHWHYSVVARYFHNGGQWQNGAKLNWGDGDFSAKSTGWGGYLVVGYNF	Y	Conserved in Enterobacteriaceae	168614	31627.2	20176.4	37909.9	120343	18092.5	11046.4	17500.6
man-6	STM14_0550	524651	524962	-	390	312	ATGGATATTCAGGACACATTTCCTCAACGCGTCTGGCAAATCGTCGCCTCGATCCCGGAAGGGTTTGTCACGACCTACGGCGATGTCGCCCGGCTTGCCGGTTCGCCTCGGGCGGCGCGTCAGGTCGGCGGAGTTTTAAAACGTCTGCCGGAAGGCAGCACTTTACCATGGCATCGGGTGGTGAACCGCCACGGCGCAATATCACTTACCGGGCCGGATCTACAGCGGCAACGTCAGGCATTACTGGCGGAAGGCGTGGTGGTGTCGGGAAGCGGACAAATCGATTTACAACGCTATCGCTGGGTGTATTAA	103	MDIQDTFPQRVWQIVASIPEGFVTTYGDVARLAGSPRAARQVGGVLKRLPEGSTLPWHRVVNRHGAISLTGPDLQRQRQALLAEGVVVSGSGQIDLQRYRWVY	N	Conserved in Enterobacteriaceae	1886.95	2438.45	3686.3	3277.07	3708.19	1853.35	4918.14	3911.21
man-7	STM14_0564-1	538624	538833	-	936	210	ATGACAATAGCGGAATGGCTGGAAGAAAAAGGCCGAACGGAAGGGTTGCAAAAGGGCCTGCAAAAAGGCCTTGAGCAAGGGTTAGCACAAGGCCGTGAGGCCGAAGCGCGCGCTATTGCCCGCAAAATGCTTGCCAACGGGCTGGAACCCGGGCTCATCGCCAGCGTCACCGGCATTACGCCGGAAGAGCTTTCTACGCTTTCGCATTAG	69	MTIAEWLEEKGRTEGLQKGLQKGLEQGLAQGREAEARAIARKMLANGLEPGLIASVTGITPEELSTLSH	N	Conserved in Enterobacteriaceae	1579.1	1830.09	2996.27	2619.47	4709.57	5139.97	7721.53	8482.65
man-8	STM14_0564-2	539292	539408	-	936	117	TTGTTGAAGACAATTTACGCAGCCGCTATTCAGATATTCTCTACTCTCTGCATACCCAACACGGCCCCGGGTATGTTTACGCGCTCATTGAACATCAGAGCAAATCAGACCGGCTGA	38	MLKTIYAAAIQIFSTLCIPNTAPGMFTRSLNIRANQTG	N	Conserved in Enterobacteriaceae	369.69	469.25	969.79	970.98	956.95	823.71	2418.38	1798.26
man-9	STM14_0635	604809	605366	+	543	558	ATGAAACATAAATTAATGACCTCTACTATTGCGAGTCTGATGTTTGTCGCTGGCGCAGCGGTTGCGGCTGATCCTACTCCGGTGAGCGTGAGTGGCGGTACTATTCATTTCGAAGGTAAACTGGTTAATGCAGCCTGTGCCGTCAGCACTAAATCCGCCGATCAAACGGTGACGCTGGGTCAATACCGTACCGCCAGCTTTACGGCGATTGGTAATACGACTGCGCAGGTGCCTTTCTCCATCGTCCTGAATGACTGCGATCCGAAAGTGGCGGCCAACGCTGCCGTGGCTTTCTCTGGTCAGGCAGATAACACCAACCCTAATTTGCTGGCTGTCTCCTCTGCGGACAATAGCACTACCGCAACCGGCGTCGGGATTGAGATTCTTGATAATACCTCT…	185	MKHKLMTSTIASLMFVAGAAVAADPTPVSVSGGTIHFEGKLVNAACAVSTKSADQTVTLGQYRTASFTAIGNTTAQVPFSIVLNDCDPKVAANAAVAFSGQADNTNPNLLAVSSADNSTTATGVGIEILDNTSSPLKPDGATFSAKQSLVEGTNTLRFTARYKATAAATTPGQANADATFIMKYE	Y	Conserved in Enterobacteriaceae	2385.75	6353.32	5388.58	32650	2641.91	3592.45	4349.18	15534.6
man-10	STM14_0708	671948	673513	+	1683	1566	ATGCTCGACACAAATATGAAAACCCAGCTCAGGGCTTACCTTGAGAAACTGACCAAACCTGTTGAGCTGATTGCCACGCTGGATGACAGCGCTAAATCGGCGGAAATCAAGGAACTGCTGGCTGAAATCGCCGAGCTGTCCGACAAAGTCACGTTTAAAGAAGACAATACTCTGCCGGTGCGCAAGCCGTCTTTCCTGATTACGAATCCAGGTTCTCAGCAAGGGCCGCGCTTTGCCGGTTCTCCGCTGGGCCACGAATTTACCTCGCTGGTTTTGGCGCTGCTGTGGACCGGCGGTCATCCGTCAAAAGAAGCGCAGTCGCTGCTGGAGCAGATTCGCGATATTGACGGCGATTTTGAATTCGAAACTTATTATTCACTCTCCTGCCATAACTGCCCG…	521	MLDTNMKTQLRAYLEKLTKPVELIATLDDSAKSAEIKELLAEIAELSDKVTFKEDNTLPVRKPSFLITNPGSQQGPRFAGSPLGHEFTSLVLALLWTGGHPSKEAQSLLEQIRDIDGDFEFETYYSLSCHNCPDVVQALNLMAVLNPRIKHTAIDGGTFQNEITERNVMGVPAVFVNGKEFGQGRMTLTEIVAKVDTGAEKRAAEALNKRDAYDVLIVGSGPAGAAAAVYSARKGIRTGLMGERFGGQVLDTVDIENYISVPKTEGQKLAGALKAHVSDYDVDVIDSQSASKLVPAATEGGLHQIETASGAVLKARSIIIATGAKWRNMNVPGEDQYRTKGVTYCPHCDGPLFKGKRVAVIGGGNSGVEAAIDLAGIVEHVTLLEFAPEMKADQVLQDK…	N	Conserved in Enterobacteriaceae	5074.48	9646.31	9909.93	12458.6	5350.31	8025.05	6636.64	8338.83
man-11	STM14_0756	709621	712203	-	2826	2583	ATGCAAGAGCAATACCGCCCGGAAGAGATAGAATCCAAAGTACAGCTTCACTGGGATGAGAAGCGCACATTTGAAGTGACCGAAGACGAGAGCAAAGAGAAGTATTACTGCCTGTCGATGCTTCCCTATCCTTCTGGCCGACTACACATGGGCCACGTACGTAACTACACCATCGGCGACGTGGTTGCCCGCTACCAGCGTATGCTGGGCAAAAACGTGCTGCAGCCAATCGGCTGGGACGCCTTCGGCCTGCCGGCGGAAGGCGCGGCGGTGAAGAACAACACCGCGCCGGCGCCGTGGACGTACGACAACATCGCGTATATGAAAAACCAGCTAAAAACGCTGGGTTTTGGCTATGACTGGAGCCGTGAAATCGCGACCTGCACCCCGGAATACTAC…	860	MQEQYRPEEIESKVQLHWDEKRTFEVTEDESKEKYYCLSMLPYPSGRLHMGHVRNYTIGDVVARYQRMLGKNVLQPIGWDAFGLPAEGAAVKNNTAPAPWTYDNIAYMKNQLKTLGFGYDWSREIATCTPEYYRWEQKFFTELYKKGLVYKKTSAVNWCPNDQTVLANEQVIDGCCWRCDTKVERKEIPQWFIKITAYADELLRDLDKLDHWPDTVKTMQRNWIGRSEGVEITFDVKGYDNTLTVYTTRPDTFMGATYLAVAAGHPLAQKAAANNAELAAFIDECRNTKVAEAEMATMEKKGVDTGYKAIHPLTGEEIPVWAANFVLMEYGTGAVMAVPGHDQRDYEFASKYGLTIKPVILAADGSEPDLSEQALTEKGVLFNSGEFDGLAFEAAFNAI…	N	Conserved in Enterobacteriaceae	15137	34190.9	27744.3	43546.7	16522.1	30505.5	22237.3	34737.5
man-12	STM14_0810	757625	758155	-	630	531	ATGGCAATCACTGGCATCTTTTTCGGCAGCGACACCGGTAATACCGAAAATATCGCAAAAATGATTCAAAAACAGCTTGGTAAAGACGTTGCCGATGTGCATGACATTGCAAAAAGCAGTAAAGAAGACCTGGAAGGGTATGACATTCTGCTGCTGGGCATCCCAACCTGGTATTATGGCGAAGCGCAATGTGACTGGGATGACTTCTTCCCGACTCTCGAAGAGATTGACTTTAACGGTAAGCTGGTGGCGCTGTTTGGCTGTGGCGATCAGGAAGACTACGCGGAATACTTCTGTGATGCGCTGGGCACGATTCGCGACATTATTGAGCCGCGCGGCGCCACGATTGTGGGTCACTGGCCAACCGCAGGCTATCATTTTGAAGCCTCTAAAGGTCTG…	176	MAITGIFFGSDTGNTENIAKMIQKQLGKDVADVHDIAKSSKEDLEGYDILLLGIPTWYYGEAQCDWDDFFPTLEEIDFNGKLVALFGCGDQEDYAEYFCDALGTIRDIIEPRGATIVGHWPTAGYHFEASKGLADDDHFVGLAIDEDRQPELTAERVEKWVKQVSAELHLDDILNA	N	Conserved in Enterobacteriaceae	36994.9	84518.1	46786.7	58024.3	21858.5	37279.3	26294.7	34577.4
man-13	STM14_0814	759688	760230	+	576	543	ATGAAAACGATTGAAGTTGATGATGAACTCTATAGCTATATTGCCAGCCACACCAAGCATATCGGCGAGAGCGCATCCGACATTTTACGGCGTATGTTGAAGTTTTCCGCCACGACACAGCCAACGGCTTCAGCGGTGAAGGGGACGCCTGCGGCGCAACCCGTTGCCGAAGCGAAACCGGTTAACCCGGTAAAAGACAAAGTTCGCGCGATGCGTGAGCTGTTGTTGTCTGACGAATATGCCGAGCAGAAAAAAGCGGTCAACCGCTTTATGCTGATTCTGACTACACTCTATTCACTGGATCACCACGCGTTTGCGGAGGCGACGGAGTCGTTGCATGGCCGCACGCGCGTCTATTTTGCGGCGGATGAACAAACGCTGCTGAAAAATGGGAATCAA…	180	MKTIEVDDELYSYIASHTKHIGESASDILRRMLKFSATTQPTASAVKGTPAAQPVAEAKPVNPVKDKVRAMRELLLSDEYAEQKKAVNRFMLILTTLYSLDHHAFAEATESLHGRTRVYFAADEQTLLKNGNQTKPKHVPGTPYWVITNTNTGRKCSMIEHIMQSMQFPAELIEKVCGTI	N	Conserved in Enterobacteriaceae	15966.7	31690.8	16916.2	26934	18591.8	22611.6	20342.4	27432.9
man-14	STM14_0884	824114	825166	+	1182	1053	ATGAATTATCAGAACGACGATTTACGCATTAAAGAAATCAACGAGTTATTACCTCCGGTCGCGCTGCTGGAAAAGTTTCCCGCCACGGAAAATGCAGCAAATACCGTTGCTCACGCGCGCAAAGCCATCCATAAAATTCTCAAAGGCAATGACGATCGTCTGCTGGTGGTGATCGGTCCTTGTTCAATTCATGATCCGGCAGCGGCGAAAGAGTATGCCGCCCGTTTGCTGGCGCTACGCGATGAGCTTCAAGGCGAGCTTGAAATTGTCATGCGCGTCTATTTTGAGAAACCGCGTACCACCGTCGGCTGGAAAGGGCTGATTAACGATCCGCACATGGATAACAGCTTCCAGATTAACGACGGTCTGCGTATTGCGCGCAAACTGCTGCTGGATATT…	350	MNYQNDDLRIKEINELLPPVALLEKFPATENAANTVAHARKAIHKILKGNDDRLLVVIGPCSIHDPAAAKEYAARLLALRDELQGELEIVMRVYFEKPRTTVGWKGLINDPHMDNSFQINDGLRIARKLLLDINDSGLPAAGEFLDMITPQYLADLMSWGAIGARTTESQVHRELASGLSCPVGFKNGTDGTIKVAIDAINAAGAPHCFLSVTKWGHSAIVNTSGNGDCHIILRGGKAPNYSAQHVAEVKEGLTKAGLTPQVMIDFSHANSCKQFQKQMEVCADVCQQIAGGEKAIIGVMVESHLVEGNQSLESGQPLTYGKSITDACIGWEDTDALLRQLSAAVKARRG	N	Conserved in Enterobacteriaceae	13972.9	15969.6	27927.9	35801.5	13220.1	11641.8	20845.6	27719.8
man-15	STM14_0888	827686	828612	-	984	927	GTGTATAATGCTACTTATATAAATGAAACTCATCCAATGCTAATAAGGTTGCAGCTTATGCAATATCGGCATCACCTCGAACTAACATGGCTCGAAGACTGTCTGGCTCTAAAAGAAACGTTGAATTTCTCAAAAGCGTCTGCCTCAAGATATGTGACTCAACCCGCATTTAGTCGTCGGATACAATCTCTCGAAGAATGGGTGGGTACGCCCCTTTTTGAAAGAAGTAAACGGGGAGTCACCCTTACCAAGGCCGGAGAAGTATTTACAGACCAGCTTCCCGAACTGATCCACTCCTTGTACACATTGAAAAGTGATACCCTTGAGGCCGCAGGTAATAAACAACCCAGTCTTGTTTTTTCAGCAACGCATGCTTTGTCTTTCTCTTTTGTACCGCAT…	308	MYNATYINETHPMLIRLQLMQYRHHLELTWLEDCLALKETLNFSKASASRYVTQPAFSRRIQSLEEWVGTPLFERSKRGVTLTKAGEVFTDQLPELIHSLYTLKSDTLEAAGNKQPSLVFSATHALSFSFVPHLLKQSDKIAKFGSFRLLSDSLNACEKMMRQGDSQFLLCHHHPHMHLNLNKNNFMSIRLGFDTLIPFSKPDSETLKPLWNINNKIQFPYLSFSSQSGLGRIIANTASINRITHNINVAFVADLAATLLAMVRSGDGVAWIPQSLARQDIEAKTIVTAAEKESNLWVPIEIRLYRPAKRMPPDAEELWEIFVEEQI	N	Conserved in Enterobacteriaceae	152.94	228.44	294.87	238.65	603.9	686.16	5658.53	7777.33
man-16	STM14_0906	845699	845848	+	252	150	ATGTTAGAGTTATTAAAAAGTCTGGTATTCGCCGTCATCATGGTACCGGTAGTGATGGCCATCATCCTCGGTCTGATTTACGGTCTGGGTGAGGTGTTCAACATTTTTTCCGGTATCGGTCAGAAAGACCAGTCCAGACAGAACCGCTGA	49	MLELLKSLVFAVIMVPVVMAIILGLIYGLGEVFNIFSGIGQKDQSRQNR	N	Conserved in Enterobacteriaceae	22764.2	45281.8	36549.6	27345	10698.7	18889.4	24885.1	22348.8
man-17	STM14_1100	1015797	1016654	-	978	858	GTGAAAGCTGACAACCCTTTTGACCTTTTACTCCCTGCAGCAATGGCCAAAGTGGCTGAAGAAGCAGGCGTCTATAAAGCAACGAAACATCCGCTTAAGACTTTCTATCTGGCGATTACCGCCGGCGTATTCATTTCAATTGCCTTTGTTTTTTATATTACTGCGACAACCGGTACTGGCGCGATGCCTTATGGCATGGCGAAACTTATCGGGGGTATCTGTTTCTCTTTGGGACTGATTCTCTGTGTTATTTGCGGCGCTGATCTCTTCACCTCTACTGTTCTGATCGTTGTAGCTAAAGCTAGCGGTCGCATCACCTGGGGGCAACTGGCTAAAAACTGGTTAAACGTCTATTTTGGTAACCTGATTGGCGCTCTGCTTTTCGTGTTACTGATGTGG…	285	MKADNPFDLLLPAAMAKVAEEAGVYKATKHPLKTFYLAITAGVFISIAFVFYITATTGTGAMPYGMAKLIGGICFSLGLILCVICGADLFTSTVLIVVAKASGRITWGQLAKNWLNVYFGNLIGALLFVLLMWLSGEYMTANGQWGLNVLQTADHKMHHTFIEAVCLGILANLMVCLAVWMSYSGRSLMDKAFIMVLPVAMFVASGFEHSIANMFMIPMGIVIRDFATPEFWTAVGSSPESFSHLTVMSFITDNLIPVTIGNIIGGGLLVGLTYWVIYLRGNEHH	N	Conserved in Enterobacteriaceae	2727.85	8921.94	5975.02	17317.4	10504.7	13456.5	20103.8	37044.2
man-18	STM14_1148	1063409	1063750	-	411	342	ATGGCTGACCTCTCACGGCGCGTAATGCTTTCTCACACATCTGTGAGAAAGTGGGCCTCTGGCACGTCTGTAGCCAGCGGAGAGCGCTTGAAAAGGTTATCGGCGGTGACCGGAAGGCCTGAATATTGGTTCTTCATGGAGCCAGGGGATGAAAGTGAAGGCGAAAGGGCTGAACCTAAACCCAGAGTCCTTGATGAAAAAGAAGAAACATTGCTTTCTCTTTTCAATCAACTCCCGGAAGCAGAGAAACTGCGTGTTATCCTCCATACAAAAGCAGTCCTCCAAGAGATGGATCTGCTGAAGAACAACGTTTTTGATCTAATTAACGACCTCAAAAAATAG	113	MADLSRRVMLSHTSVRKWASGTSVASGERLKRLSAVTGRPEYWFFMEPGDESEGERAEPKPRVLDEKEETLLSLFNQLPEAEKLRVILHTKAVLQEMDLLKNNVFDLINDLKK	N	Conserved in Enterobacteriaceae	4855.13	7086.45	6032.18	6049.15	6383.87	9637.44	9896.25	10253.2
man-19	STM14_1155	1067103	1067372	+	291	270	ATGTATCAGCGAATGATTTTTGAAGAAGGAAAAGAGCCAAGGTTGTATTCAAGCCAACATGACTCCAAGTTTATCCCAATAAGTAATAACAATGGAAAAGTTCAAAAGGTTCCTGTTATGGAGTTCAAGGATACCAGAGGAGATGTTTTTTATGCTTACAACTATGCTTATTCTGGTAAAAAACCATCAAATGACGAAATCTATAAGGCTATTGATGAGCTAAAGCCAATCGGTGAAAAATTCGAAATGTCTAAGACTATAAGCGATTAG	89	MYQRMIFEEGKEPRLYSSQHDSKFIPISNNNGKVQKVPVMEFKDTRGDVFYAYNYAYSGKKPSNDEIYKAIDELKPIGEKFEMSKTISD	N	Conserved in Enterobacteriaceae	17310.3	27277.1	26188.7	18424.8	10850.8	14206.3	15034.2	15117.4
man-20	STM14_1163	1070831	1071049	+	318	219	ATGGGGTTCTATTACGTTTTTCAATACAAGCCGAAAGGGATGTCGTCGGGTAAGCATTTAAATGTTTCCGAGGAGTTTTCGGACCGGAATGAGGCAAAGAGAGCGAAGTCCAGGCACATGATTAATGATCCAGATTGTGTCTTCTCGGGAATCGTGCAGGCTGATTCGCCGGCAGCGGTACTTCAAGAAGTACAGGCTGAATCTCTTAATAGGCTTTAA	72	MGFYYVFQYKPKGMSSGKHLNVSEEFSDRNEAKRAKSRHMINDPDCVFSGIVQADSPAAVLQEVQAESLNRL	N	Conserved in Enterobacteriaceae	3620.92	6947.91	7653.84	10183.8	5453.31	10385.5	5018.96	7493.57
man-21	STM14_1199	1102486	1105098	+	2745	2613	ATGACACAACAGCCACAAGCCAAATACCGCCATGACTATCGCGCGCCGGATTACCAGATTACTGATATTGACTTGACCTTTGACCTCGATGCCGAAAAAACCGTGGTCACCGCAATAAGCCAGGCTGTTCGTCATGGCGCGCCTGATGCGCCTCTTCGCCTTGATGGGGAAGATTTAACGCTGGTATCTATCCACGTCAACGATGCGCCGTGGACAGCATATAAAGAAGAAGAGGGCGCGCTTGTCATCAGCGACCTGCCAGAGCGTTTTACGTTACGCATTGTCAACGAGATAAGTCCGGCGGCGAATACGGCGCTGGAAGGATTGTACCAGTCAGGCGATGCGCTCTGTACCCAGTGTGAAGCGGAGGGCTTCCGCCATATTACCTGGTATCTTGAC…	870	MTQQPQAKYRHDYRAPDYQITDIDLTFDLDAEKTVVTAISQAVRHGAPDAPLRLDGEDLTLVSIHVNDAPWTAYKEEEGALVISDLPERFTLRIVNEISPAANTALEGLYQSGDALCTQCEAEGFRHITWYLDRPDVLARFTTKIIADKSKYPFLLSNGNRVAQGELENGRHWVQWQDPFPKPCYLFALVAGDFDVLRDTFTTRSGREVALELYVDRGNLDRAPWAMTSLKNSMKWDEARFGLEYDLDIYMIVAVDFFNMGAMENKGLNIFNSKYVLARTDTATDKDYLDIERVIGHEYFHNWTGNRVTCRDWFQLSLKEGLTVFRDQEFSSDLGSRAVNRISNVRTMRGLQFAEDASPMAHPIRPDKVIEMNNFYTLTVYEKGAEVIRMIHTLLGEEN…	N	Conserved in Enterobacteriaceae	14454.6	7501.07	13749.4	19161.9	14140	7649.46	9820.66	12657.6
man-22	STM14_1225	1129090	1130301	-	1368	1212	ATGACTGAATCTACATTTCCGCAATATCCCCGTTTAGTCCTCAGCAAAGGGCGAGAAAAATCTTTACTCCGCCGCCACCCATGGGTCTTTTCCGGCGCCGTATCCCGTCTGGAAGGCAAAGCCAACCTCGGTGAAACTATCGATATCGTCGACCATCAGGGAAAGTGGTTAGCACGCGGCGCCTGGTCACCAGCCTCCCAGATCCGCGCGCGCGTCTGGACATTTGATAAAGCAGAATCCATTGATATTGCGTTTTTCACCCGCCGCCTGCGCCAGGCGCAGCAGTGGCGCGACTGGCTGGCGAAAAAAGACGGCCTGGATAGCTATCGTCTGATCGCCGGTGAGTCCGATGGCCTGCCTGGCGTCACTATCGATCGTTTTGGTCATTTTTTGGTGCTG…	403	MTESTFPQYPRLVLSKGREKSLLRRHPWVFSGAVSRLEGKANLGETIDIVDHQGKWLARGAWSPASQIRARVWTFDKAESIDIAFFTRRLRQAQQWRDWLAKKDGLDSYRLIAGESDGLPGVTIDRFGHFLVLQLLSAGAEYQRAALISALQTCYPDCAIYDRSDVAVRKKEGMALTQGPVTGELPPALLPIEEHGMKLLVDIQGGHKTGYYLDQRDSRLATRRYVENQRVLNCFSYTGGFAVSALMGGCRQVVSVDTSQDALDIARQNVELNQLDLSKAEFVRDDVFKLLRAYREHGEKFDVIIMDPPKFVENKSQLMGACRGYKDINMLAIQLLNPGGILLTFSCSGLMTSDLFQKIIADAAIDAGRDVQFIEQFRQAADHPVIATYPEGLYLKGFA…	N	Conserved in Enterobacteriaceae	6158.12	16993.7	4983.04	8105.49	7128.57	9080.82	4301	6422.99
man-23	STM14_1240	1138982	1140451	-	1563	1470	ATGAAAAAGTATCTTGCATTCGCCGTTACGCTGCTGGGTATGGGTAAAGTCATCGCCTGTACTACCCTTTTGGTAGGCAATCAGGCTTCGGCTGACGGCTCCTTCATTATCGCGCGCAACGAAGATGGCTCGGCAAATAACGCCAAGCATAAGGTTATTCATCCCATCGCGTTTCATCAACAAGGCGAGTATAAAGCACATCGGAACAATTTTAGCTGGCCGCTTCCGGAGACAGCGATGCGCTATACGGCGATTCATGACTTTGATACTAACGATAACGCCATGGGTGAAGCCGGTTTCAATTCGGCGGGCGTCGGAATGAGCGCAACGGAAACCATTTATAACGGCAGAGCGGCGCTGGCTGCCGATCCTTACGTGACAAAAACGGGAATCACGGAA…	489	MKKYLAFAVTLLGMGKVIACTTLLVGNQASADGSFIIARNEDGSANNAKHKVIHPIAFHQQGEYKAHRNNFSWPLPETAMRYTAIHDFDTNDNAMGEAGFNSAGVGMSATETIYNGRAALAADPYVTKTGITEDAIESVILPVAQSARQGAKLLGDIIEQKGAGEGFGVAFIDSKEIWYLETGSGHQWLAVRLPADSYFVSANQGRLRHYDPNDNANYMASPTLVSFAKKQGLYDPARGEFDFHQAYSQDNKNDTTYNYPRVWTLQHQFNPHLDTVVSEGETFPVFLTPITKISVAAVKNALRNHYQGTSHDPYASHNPQEPWRPISVFRTQESHILQVRPKLPQAIGNVEYIAYGMPSLSVYLPYYQGMRHYQPGDDKGTDRASNDSTYWTFRTLQTL…	Y	Conserved in Enterobacteriaceae	532.9	176.07	2526.13	947.73	1764.5	616.27	3879.27	2356.82
man-24	STM14_1293	1177817	1178965	+	1161	1149	ATGAAAAATTTTAAGAAAATGATGACGCTAATGGCGCTATGTTTCTCAGTTGCTATCACCACATCAGGATATGCAACGACGCTTCCTGATATACCAGAACCACTGAAAAATGGTACTGGCGCTATTGATAATAATGGCGTGATTTATGTCGGCTTAGGTACCGCAGGGACATCCTGGTATAAAATTGATCTTAAAAAGCAACATAAAGACTGGGAGCGTATAAAGTCGTTTCCTGGTGGAGCTCGTGAGCAATCCGTGTCGGTATTTTTAAATGATGAGCTTTATGTTTTTGGTGGCGTAGGGAAAAAAAACAGTGAATCACCGTTGCAGGTTTATAGCGATGTGTACAAATACTCACCGGTGAAAAATACATGGCAAAAAGTTGACACTATATCTCCA…	382	MKNFKKMMTLMALCFSVAITTSGYATTLPDIPEPLKNGTGAIDNNGVIYVGLGTAGTSWYKIDLKKQHKDWERIKSFPGGAREQSVSVFLNDELYVFGGVGKKNSESPLQVYSDVYKYSPVKNTWQKVDTISPVGLTGHTGVKLNETMVLITGGVNEHIFDKYFIDIAAAAADESEKNKVIYNYFNKPAKDYFFNKIVFIYNAKENTWKNAGELPGAGTAGSSSVMGNNFLMLINGELKPGLRTDVIYRAMWDNDKLTWLKNSQLPPSPGEQQQEGLAGAFSGYSHGVLLVGGGANFPGAKQNYTNGKFYSHEGINKKWRDEVYGLINGHWQYMGKMKQPLGYGVSVSYGDEVFLIGGENAKGKPVSSVTSFTMRDGNLLIK	Y	Conserved in Enterobacteriaceae	493.56	75.09	193.01	234.17	584.66	67.1	255.73	170.91
man-25	STM14_1302	1185726	1186148	+	531	423	GTGGCTGTCTCCCTGGGGTTACTAAGCTGGGCCGGTTTTTTAGGCTGTACGGCTTATTTCGCCTGTCCGCAGGGCGGCTTTAAGGGATTGTTGATTTCCGCCTGTACGCTGTTAAGCGGTATGGTGTGGGCGCTGGTCATTATTCACGGTAGCGCGTTGGCGCCGCATCTGGAAATTGTCAGTTACGTGTTGACGGGGATCGTGGCATTCCTGATGTGTATCCAGGCAAAGCAGCTATTGCTTTCTTTTGTTCCGGGAACATTTATCGGCGCCTGCGCGACATTTGCAGGGCAGGGTGACTGGCGGTTGGTATTACCGTCGCTGGCGCTGGGGCTAATCTTTGGCTATGCCATGAAAAATAGTGGGCTATGGCTGGCATCACGCCGCGAGCAACATTCA…	140	MAVSLGLLSWAGFLGCTAYFACPQGGFKGLLISACTLLSGMVWALVIIHGSALAPHLEIVSYVLTGIVAFLMCIQAKQLLLSFVPGTFIGACATFAGQGDWRLVLPSLALGLIFGYAMKNSGLWLASRREQHSANTAVTK	N	Conserved in Enterobacteriaceae	1817.85	1056.89	670.6	1498.34	7852.43	6880.63	6534.76	6830.84
man-26	STM14_1359	1230402	1231253	+	1044	852	ATGATTTATCGCATCTTGCGTAAAGGCGAGGTGCGGGTGAACAAAAAACGCATTAAACCGGAATACAAACTGGAAGCGGGCGATGAAGTCCGCATTCCGCCGGTTCGCGTTGCTGAACGCGAAGAAGAGGCCGTGTCGCCGCATTTGCAAAAAGTGGCGGCGTTGGCGGACGTCATTTTGTATGAAGACGACCATATTCTGGTGCTGAATAAGCCTTCCGGCACCGCCGTACACGGCGGGAGCGGGTTAAGTTTTGGCGTCATCGAAGGGCTGCGGGCGTTGCGTCCGGAAGCGCGATTCCTGGAACTGGTGCATCGTCTTGACCGCGATACCTCCGGCGTGCTGTTGGTGGCGAAAAAACGCTCCGCGCTGCGTTCGCTGCATGAGCAACTGCGCGAA…	283	MIYRILRKGEVRVNKKRIKPEYKLEAGDEVRIPPVRVAEREEEAVSPHLQKVAALADVILYEDDHILVLNKPSGTAVHGGSGLSFGVIEGLRALRPEARFLELVHRLDRDTSGVLLVAKKRSALRSLHEQLREKGMQKDYLALVRGQWQSHVKTVQAPLLKNILQSGERIVRVSQEGKPSETRFKVEERYAFATLVRCSPVTGRTHQIRVHTQYAGHPIAFDDRYGDREFDQQLTEAGTGLKRLFLHAAALKFTHPGTGEVMRIEAPMDNALKRCLQVLRNAK	N	Conserved in Enterobacteriaceae	5587.2	18024.8	11447	14323.5	7600.01	16492.2	14382.5	16693.4
man-27	STM14_1392	1260842	1262041	+	1311	1200	ATGTATCAACCTGTCGCTCTATTCATTGGCCTGCGTTACATGCGCGGGCGTGCAGCAGATCGCTTCGGTCGCTTCGTTTCCTGGCTTTCCACTATCGGCATTACCCTGGGGGTGATGGCGCTGGTCACGGTATTGTCGGTGATGAACGGTTTTGAGCGCGAACTGCAAAATAACATTCTTGGTTTGATGCCTCAGGCCATCCTCTCTGCTGAACATGGTTCTCTTAACCCGAATCAGATGCCGGAAAAAGCGGTGAATCTGCAAGGCGTTAACCGTATTGCGCCGCTGACGACGGGCGATGTCGTACTGCAAAGCGCGCGTAGCGTTGCGGTTGGCGTGATGTTAGGTATCGATCCGGCGCAAAAAGATCCATTAACGCCGTATCTGGTCAATGTGAAG…	399	MYQPVALFIGLRYMRGRAADRFGRFVSWLSTIGITLGVMALVTVLSVMNGFERELQNNILGLMPQAILSAEHGSLNPNQMPEKAVNLQGVNRIAPLTTGDVVLQSARSVAVGVMLGIDPAQKDPLTPYLVNVKQSELQPGKYNVILGEQLAGQLGVNRGDQIRLMVPSASQFTPMGRLPSQRLFTVIGTFAANSEVDGYEMLVNIQDASRLMRYPAGNITGWRLWLDEPLQVDTLSQQTLPQGTKWQDWRERKGELFQAVRMEKNMMGLLLSLIVAVAAFNIITSLGLMVMEKQGEVAILQTQGLTPRQIMMVFMVQGASAGIIGALLGAALGALLASQLNNLMPIIGAFLDGAALPVAIEPLQVIVIALVAMAIALLSTLYPSWRAAATQPAEALRYE	N	Conserved in Enterobacteriaceae	4884.04	5960.88	4822.27	7399.28	8490.55	9508.94	8252.71	9806.81
man-28	STM14_1403	1270193	1271311	-	1137	1119	TTGAATAATCAACCGCGTTCGCTTTCACCGCTGGTGCTTTTGTCGGGAATTAGCAAAAGTTTCGATGGCAAAGAGGTCATTTCGCAACTGGATTTGACCATTAACAATGGCGAATTCCTCACGCTGCTTGGCCCTTCCGGCTGCGGTAAAACAACCGTTCTTCGCCTGATTGCCGGCCTGGAAACCGTTGATGCCGGGCATATCATGTTGGATAACCAGGATATCACCCACGTTCCCGCCGAAAATCGTTATGTAAATACCGTATTTCAAAGCTACGCTTTATTTCCGCATATGACGGTGTTTGAAAATGTCGCGTTTGGCTTACGGATGCAAAAAACGCCAGCCGCCGAGATAGCGCCTCGCGTGACCGATGCGCTGCGTATGGTGCAGCTTGAAGAG…	372	MNNQPRSLSPLVLLSGISKSFDGKEVISQLDLTINNGEFLTLLGPSGCGKTTVLRLIAGLETVDAGHIMLDNQDITHVPAENRYVNTVFQSYALFPHMTVFENVAFGLRMQKTPAAEIAPRVTDALRMVQLEEFAQRKPHQLSGGQQQRVAIARAVVNKPRLLLLDESLSALDYKLRKQMQNELKALQRKLGITFVFVTHDQEEALTMSDRIVVMRNGVIEQDGTPREIYEEPKNLFVAGFIGEINRFDATVIERLDEQRVRASVEGRECNIYVNFAVEPGQKLNVLLRPEDLRVEEINDDNHIEGLIGYVRERNYKGMTLESVVELENGKMVMVSEFFNEDDPDFDHSLDQKMAISWVESWEVVLADEEHK	N	Conserved in Enterobacteriaceae	1606.28	8838.56	5526.23	5904.41	4152.35	13297.8	7264.86	9225.6
man-29	STM14_1429	1293066	1293449	-	468	384	ATGAGCGATAACACACTGACGAATGGCCTGATCTCCAGGCTGGCAGAGTTAAATAAGAAGGGTTTCTCTAAAACAGAGATGGCCAGGGTAGCTGGTGTCAGCAAGCAAGCAGTTTCCAGTTGGTTCAAAACAGGAAGAATTAGTAAAAGCTCCGCATTAGCTATCGCTGATGCTGCTGGCGTATCAGTTCCGTGGCTGCTTGGTGAGGATGTCGGAGAGAAAGACGGACTTAAACCTGACGAACAGCGCCTGCTTGAGCTCTATCGCCAGTTGCCCGAGGAAGAGCAGCAGAACATGATGAGAGTTTTCTCTCTGAGGCTGAAAGAGCTGGACGAGTTGTACGCGAAGTACATGAGCCGCAGGATAAAAGGTGAAGGCGCATAA	127	MSDNTLTNGLISRLAELNKKGFSKTEMARVAGVSKQAVSSWFKTGRISKSSALAIADAAGVSVPWLLGEDVGEKDGLKPDEQRLLELYRQLPEEEQQNMMRVFSLRLKELDELYAKYMSRRIKGEGA	N	Conserved in Enterobacteriaceae	5631.97	9170.9	6473.75	5792.37	13217.9	22186.2	16125.7	17788.7
man-30	STM14_1430	1293547	1293774	+	153	228	ATGACTGGTATTGAAAAAGCAATTCAAAAATTTGGAACAGGGGCTGCTCTTGGAAGAGCGCTTGGATTTTCAAAAATGACAATTTCCAACTGGAAAAAGACCGGGATTCCCCCCGATCACATTCGTTCAGTTTTCGAACTTACAGGTGTTACGCCACATGAGTTACGGCCTGACTTGTATCCAAATCCAACAGATGCATTACCAAGCCAAGAGGCGTCAGCCAAATAA	75	MTGIEKAIQKFGTGAALGRALGFSKMTISNWKKTGIPPDHIRSVFELTGVTPHELRPDLYPNPTDALPSQEASAK	N	Conserved in Enterobacteriaceae	1138.25	997.61	633.38	2491.34	1227.67	676.31	763.7	1353.43
man-31	STM14_1515	1349146	1350732	+	1635	1587	ATGATTAAAGGCAAACTGGCGCTCGTGACGTGCGCGCTGACTCTGGTATTCACTTCGTCGCTTTTCGCCGCGTCGGACACGGCAGACGGTCGTACCCTGAAGCTGGCCATTGGCCCTGAGCCAACGGAAGGCTTTGATCCTATGCTGGGCTGGAGCCACGGCAGCTACTTATTGCTTCATGCGCCGTTGCTTAAGCAAAACGCCGACATGAGTTGGGGTAATTTACTGACGGAAAAAGTGGATACCAGCCCCGACGGTAAAATCTGGACGCTAACCTTAAAGCCCGGGCTGAAATTCTCCGATGGCTCGCCATTAACTGCCGAAGATGTCGTTTTTACATACAATAAAGCGGCGAAGAGCGGCGGTAAAATTGACATGGGCAATTTTAGCCATGCGCGA…	528	MIKGKLALVTCALTLVFTSSLFAASDTADGRTLKLAIGPEPTEGFDPMLGWSHGSYLLLHAPLLKQNADMSWGNLLTEKVDTSPDGKIWTLTLKPGLKFSDGSPLTAEDVVFTYNKAAKSGGKIDMGNFSHARALDARRIEMTLSHPQSTFVNVLGSLGIVPASRYDEKTFAREPIGAGPYRLVSFQPGQQLIVEANPWYAGKKNDFNRLVFVFLDEDNAYAAARSGQLGLVRIAPSMAVAPQQDNLKLWVRDSVENRGIVFPMVPAGKKDANDYPVGNDVTADVAIRRAINYAINRKQLAEQVMEGHAIPAYSAVQGLPWQNPSVIFSDGDIAKARAILEEAGWKINSAGVREKAGKEARLTLWYASGDSTRRDLAEAVRAMLQPLGIVVSLQSGSWE…	Y	Conserved in Enterobacteriaceae	3152.48	1205.9	380.23	1525.89	3433.45	1712.51	1042.32	2023.98
man-32	STM14_1540	1363424	1363498	-	117	75	ATGAGGAAAACAACGATGGTGTTGATGGGCATCGCGCTAATTGCGGTGGCGGGTACCGAACTGGGCTGGTGGTAA	24	MRKTTMVLMGIALIAVAGTELGWW	N	Conserved in Enterobacteriaceae	1890.34	4915.11	5570.11	2471.41	6220.18	4111.97	5513.9	6732.68
man-33	STM14_1589	1399093	1399974	-	909	882	GTGGTACGGCGTCAATCAGCCCCCCGCCTTGAGTTTGAAGCGGCGGCCATTTACGAATATCCAGAACATTTACGTCCTTTCCTCAGCGAAGCGCCAGCCTTACCGGGCGTCTATATATTTCATAGCGAAAGCGATACGCTGCCGCTTTATATCGGTAAAAGCGTGAATATTCGCAGCCGGGTGCTTTCACATCTGCGAACGCCTGACGAGGCCACTATGCTGCGACAGGCGCGGCGGATAAGCTGGATCTGCACCGCTGGGGAAATGGGCGCGTTGCTGCTGGAGGCGCGGCTGATCAAAGAACAACAGCCGCTGTTTAACAAGCGGTTACGGCGTAATCGCCAGCTTTGCTCTCTCCAGTTGAGCGAACAAAAGATTGAGGTCGTTTCCGCCCGCAGC…	293	MVRRQSAPRLEFEAAAIYEYPEHLRPFLSEAPALPGVYIFHSESDTLPLYIGKSVNIRSRVLSHLRTPDEATMLRQARRISWICTAGEMGALLLEARLIKEQQPLFNKRLRRNRQLCSLQLSEQKIEVVSARSVDFSHEPNLFGLFANRRAALQSLQNLADEQKLCYGLLGLEPVSRGRACFRFALKRCAGACCGQETPQAHFLRLQASLERLRVVCWPWKGAIALKESRPQMTQFHIINNWLWLGAVPSLDEAATLVRTPAGFDQDGYKILCKPLMSGQYEIIELHTDCRQS	N	Conserved in Enterobacteriaceae	814.61	1342.78	1005.77	2094.76	2115.71	1857.56	2788.54	3562.27
man-34	STM14_1634	1435026	1435208	-	192	183	ATGGATAACACCGAGCTGCCTCACCCTAAGGAAATAGACAATGAAACGCTTCTCCCTGCCGCTGAACGGCGCGTCAACAGTCAGGCGCTATTAGGTCCGGACGGCAAAGTCATTATCGATCACAACGGTCAGGAGTATCTGTTGCGCAAAACTCAGGCCGGGAAGCTACTGTTAACCAAATAG	60	MDNTELPHPKEIDNETLLPAAERRVNSQALLGPDGKVIIDHNGQEYLLRKTQAGKLLLTK	N	Conserved in Enterobacteriaceae	10977.5	2485.84	11611.4	10847.5	6118.21	1790.56	14034.5	12340.2
man-35	STM14_1661	1460042	1460230	+	228	189	ATGTCTACTGATTTGGACCCAACCCAACTGGCGATTGAATTTTTACGCCGTGATAAAACCGAACTTTCTCCCGCGCAGTATTTGAAGCGTTTAAAACAGCTGGAGTTAGAGTTTGCCGATCTCCTCACCCTCTCAGCAACCGAACTGAAAGAAGAGATCTATTTCGCCTGGCGGTTGGGCGTGCATTAA	62	MSTDLDPTQLAIEFLRRDKTELSPAQYLKRLKQLELEFADLLTLSATELKEEIYFAWRLGVH	N	Conserved in Enterobacteriaceae	6128.22	6349.31	13644.2	17906	5430.32	5813.06	15777	18108.2
man-36	STM14_1728	1519217	1519306	+	282	90	ATGAGTACCGACCTGAAATTTTCGTTGATTACTACGCTGATTGTTCTGGGCGTGATTGTCGCAGGTGGATTAACGGCCGCTCTGCACTGA	29	MSTDLKFSLITTLIVLGVIVAGGLTAALH	N	Conserved in Enterobacteriaceae	33080.9	67016.3	71059	80918.7	15757.8	18418.2	39419.5	36157
man-37	STM14_1730	1520097	1520918	-	855	822	GTGGCGCGGATAAACAAAATCTCGATCACGCTCTGTGCTTTACTTTTTACTACTCTCCCCTTTACGCCAATGGCCCATGCTTCCAGGCAAGCCAAAGCGACGCCTGCTGTTTCTCATGTCACGAAAACGGCAGATAAAAAGAAAAGCACAACGAAAAAGATCAGTAAAACCAGCAAAAAAAACGTAAAAAAAACCTCAAAAACCAGCCGTTCTTCTTCCGCTTCTACGCCAAAACGTACCACCGCCTCCACGAAATCTCGTCATACGACGCATCGTCGTAACAGAACCGCGCCCACGTCAATCGCCGCCCTCGACGTAACGGAAAAATGCACGACGCGTAAAGGCCGTAAGCCGCACTGCGTGAAGGGGAAAGGAACATTGCCGGTCTCTATTGCCGAT…	273	MARINKISITLCALLFTTLPFTPMAHASRQAKATPAVSHVTKTADKKKSTTKKISKTSKKNVKKTSKTSRSSSASTPKRTTASTKSRHTTHRRNRTAPTSIAALDVTEKCTTRKGRKPHCVKGKGTLPVSIADAHRAKVQKATKTAMSKLMNQIGKPYHWGGASPRTGFDCSGLVYYAYKDLVKIRIPRTANEMYHLRDAAPIERSELKNGDLVFFRTQGRGTADHVGVYVGNGKFIQSPRSGQEIKITSLNEEYWQRHYVGARRVMTPKTIR	Y	Conserved in Enterobacteriaceae	3317.97	2900.67	6249.25	5637.34	5834.26	6612.55	8790.89	8668.4
man-38	STM14_1760	1545511	1545726	-	231	216	ATGACTGTTCAGGATTATCTATTAAAATTCCGCAAAATTAGTTCGCTCGAAAGTCTGGAAAAACTGTTCGACCACCTTAACTATACCCTTACTGATGACATGGACATTGTTAATATGTATCGCGCTGCAGATCACCGCCGTGCCGAACTGGTTTCCGGAGGACGCCTGTTTGATGTAGGTCAGGTTCCGCAATCCGTCTGGCGCTATGTGCAATAA	71	MTVQDYLLKFRKISSLESLEKLFDHLNYTLTDDMDIVNMYRAADHRRAELVSGGRLFDVGQVPQSVWRYVQ	N	Conserved in Enterobacteriaceae	14562.5	61802	71536.6	48332	8207.18	15080.8	34361.1	24416.4
man-39	STM14_1761	1546024	1546149	-	162	126	ATGAATCGTCTTATTGAATTAACTGGGTGGATAGTTCTCGTTATCTCAGTCATTCTTTTAGGTATTGCCAACCATATTGACAATTACCAACCACCAGAGCCCACGGCTTCCGTCCAGAAGAAGTAA	41	MNRLIELTGWIVLVISVILLGIANHIDNYQPPEPTASVQKK	N	Conserved in Enterobacteriaceae	5740.44	21288.8	14694.8	10819.5	6368.28	7036.86	14164.8	9573.59
man-40	STM14_1790	1570024	1570116	+	171	93	ATGTTCAGCGCTTTTTTCTCCACGCAAACGCATCTTCACTCTACCTCCTTTTTCCTGCTTATCGGCGAGCAGCACTGGCGTAACGCACTTTAG	30	MFSAFFSTQTHLHSTSFFLLIGEQHWRNAL	N	Conserved in Enterobacteriaceae	6614.64	6493.88	2661.94	6493.56	4213.67	3316.11	3861.6	8596.84
man-41	STM14_1860	1626567	1627238	+	792	672	ATGGTTATACCTGAGGTCAGGCAGGAGAGGCTCTATCAGAAGATAGCCAACCTCATCATTAAGCTGATCAATGATAATATTTTTCCACCGGGAACTTTTTTACCGCCAGAACGCGAACTGGCAAAACAGCTTGGCGTGAGCCGCGCCTCCTTGCGAGAAGCCCTTATTGTACTGGAGATCTCGGGATGGATCGTGATTCAGTCCGGTAATGGGGTTATCGTTTCAGATAAAAAACACCTTGCCAGCGACTATACCATCGAAGAAATTCTCTCTACTCGCGAGCTGGTCGATAGCCATTGTGCGCGCTTAGCCGCACAAAACGATAACGTTGACGTCATCAACCAAATAGAGGCGATTTATCATCGTATGGATCAAGCCATTAACGATAATAACGTCCAC…	223	MVIPEVRQERLYQKIANLIIKLINDNIFPPGTFLPPERELAKQLGVSRASLREALIVLEISGWIVIQSGNGVIVSDKKHLASDYTIEEILSTRELVDSHCARLAAQNDNVDVINQIEAIYHRMDQAINDNNVHGFYSLDKEFHLAISEASRNRVLFDMSRMLWEQRINIPYAGLDEQSGDRNVLLNLNKQHKAIVDAMRQSDADSAYEGSLEHLRYVRKIVGG	N	Conserved in Enterobacteriaceae	2149.09	2649.43	6347.11	5374.18	2415.87	3441.94	5975.77	5447.76
man-42	STM14_1863	1629760	1631250	-	1557	1491	ATGAAAAAAATATATCTCGTTGTTATCGTACTGTTTTTCATTTCTACAAAAGTTTATACACTACTTCATAACAACATCTTCTTTTGTCGAAACAGCCCGGAGTGTGATTTGTCTCATGTTCTCCCCGACTACCGGGAGCAGATTTCAGGCACACCGCTAAAATATACCTTGATTAATACAGCTCCATTAGCACAGGTGGTAGTCAGACACTATGAATTATTATCGCAACACTGGTCGCCAGATGACATGGTAACCCCTGCGCAATGGCGACATAACGTTGATATTTATATCCCTGAAACGGCAAAAGAGCACCATGCTTTGGTGGTTGTAAACAACGGAATTAATTATGATAAAGGCGTACAAATCACTGGTAAACCCGGTGATTTCCCCCAGGAAACA…	496	MKKIYLVVIVLFFISTKVYTLLHNNIFFCRNSPECDLSHVLPDYREQISGTPLKYTLINTAPLAQVVVRHYELLSQHWSPDDMVTPAQWRHNVDIYIPETAKEHHALVVVNNGINYDKGVQITGKPGDFPQETLASISRDTNTIVISVSDIPNQYLTFQDDKKPLKEDESVSRSWALFMEAPEQRKLMPLNIPMVTAISQAMRLAKKELTQWNINSFIITGISKRGWTTWLSAIADPDVEAIVPFAIDLLDIDASLEHIYQSYGGNWPITFYPYYQQGIDEKIKSPAFTQLRQIIDPLRYLNTIYQPRLAIPKYIINASGDDFFVPDNTRFYYSKLPGVKSLRIVPNMNHYSINQFAEGSLVPFINRFQSKKTLPQLIDLIHHHLLTVYFSEAPVKVVR…	N	Conserved in Enterobacteriaceae	154.72	78.91	6478.88	256.65	300.37	155.13	6014.31	272.81
man-43	STM14_1931	1696239	1696412	-	264	174	ATGACCCTCTTTCAAAAGATATTAATTTTTTACGCCGTCATGGCGGTGATATCATCCCTGATCACCTGGTTTTTGACTCATGACAAAAAACGAATTCGTTTCCTGAGCGCCTTTTTGGTTGGCGCGACATGGCCGATAAGTTTCCCCGTCGCATTGCTGTTTTCGCTTTTCTGA	57	MTLFQKILIFYAVMAVISSLITWFLTHDKKRIRFLSAFLVGATWPISFPVALLFSLF	N	Conserved in Enterobacteriaceae	1256.73	3876.55	2223.06	2439.8	8472.32	4874.11	2314.14	4594.86
man-44	STM14_1932	1696611	1696706	+	105	96	ATGAATGTTTCCAGTAAAACCGTCGTGCTGATTAATGTCTTTGCTGCTGCAGGACTTTTGGGTCTGATCTCGTTGAGATTCGGCTGGTTTGCTTGA	31	MNVSSKTVVLINVFAAAGLLGLISLRFGWFA	N	Conserved in Enterobacteriaceae	9061.21	653.61	4888.89	2740.47	17688.6	12046.8	19384.8	13442
man-45	STM14_1993	1751560	1751826	-	156	267	ATGCGCGCAGCGTTTTGGGTGGGATGTGCCGCGTTATTATTGTCGGCTTGCAGTAGCGAACCTGTTCAGCAGGCAACCGCGGCACATGTTTCGCCAGGGATGAAAGCGGCGATGTCCAGCGCCGGCGAAGCGAATTGCGCTATGATTGGCGGTTCGCTTTCAGCGGCCCGGCAGCTTGATGGTTCAGTAATTGGTATGTGCGCGCTACCCAACGGCAAACGTTGTAGCGAACAGTCGCTTGCCGCCGGAAGCTGCGGGAGTTATTAA	88	MRAAFWVGCAALLLSACSSEPVQQATAAHVSPGMKAAMSSAGEANCAMIGGSLSAARQLDGSVIGMCALPNGKRCSEQSLAAGSCGSY	Y	Conserved in Enterobacteriaceae	11465.9	6521.36	15974.8	15250.4	14746.7	10251.1	16140.6	17493.6
man-46	STM14_2009	1766256	1766510	-	387	255	ATGATCATGATGAAGCTGAAATCGGCGAAGGGGAAAAAATTTCTGTTATGCCTGCTGGCAGTGTTTATCGTTGCGGCATCGGTGGTAACGCGCGCGACTATCGGCGGTGTGATTGAGCAGTATCATATTCCACTGTCCGAGTGGACAAGCTCTATGTATGCCATTCAGTCGGCAATGATTTTCGTTTACAGTCTGGTGTTCACTATTCTGCTGGCGATTCCTTTGGGGATCTATTTCCTCGGCGGAGATGAGTAA	84	MIMMKLKSAKGKKFLLCLLAVFIVAASVVTRATIGGVIEQYHIPLSEWTSSMYAIQSAMIFVYSLVFTILLAIPLGIYFLGGDE	N	Conserved in Enterobacteriaceae	10431.7	14886.8	20751.4	25980.3	9366.86	13076.7	18095.2	18811.9
man-47	STM14_2019	1775676	1776731	+	1110	1056	ATGTATACAACCATCAGAAACACAGCGCTAGCAATGGTAGCTTGTTTTTCGTATATCGCACATGCCAGTACCCACCCTCCTCTTATTATCACCAGGGGAGCCGGAGGAGACGCCTCCGGAGCCACAGTCATTCATGATAATTGGCGGCATGGCACTCCTGACCTGGTCAATCTTACCGATATCCCCATAGATAAAATCAGACCAGAAAAATACAGTTGCATACTGATTATTGGGCAAGGAGCTATAAAAGAGATGCTTCTTGCGAACAATGCCTCAGCAATACTTTCCGGAAAAACGGTTGGTCTGTATAGTCATCTGATCGATCAGAACACGCTCAGATTACTTCGGCAATTGCAGAACAAAGTGAGATTCAATCTCTTTTTTACCCGCTCGCAGATA…	351	MYTTIRNTALAMVACFSYIAHASTHPPLIITRGAGGDASGATVIHDNWRHGTPDLVNLTDIPIDKIRPEKYSCILIIGQGAIKEMLLANNASAILSGKTVGLYSHLIDQNTLRLLRQLQNKVRFNLFFTRSQITLLKLRNISEYNFLSSKVNNVWGQDSLAIETVAPDRGNIPEKALPLKTTDYVIWLGGNYTTSSGTQRIFTNDQIVVALKPLHNVISSNASIAIMLSPRFFDNSVSKEAKVKRLKAVLNTFSRNRVTFYMSKEMLANLKEFDLPVQLSPSYAELMRMPWASATRHFASVDQYNLFADLIPKVTPFLLEPNDADQALYATDYLNTRRVSLTQNILNHGCD	Y	Conserved in Enterobacteriaceae	2548.61	1893.97	27531.1	4263.59	4311.72	1752.26	41943.7	5711.52
man-48	STM14_2020	1776945	1777181	-	255	237	ATGCAAAAATGTAGTCTTATTACGGTACTTAGCTTATCAGTGTTGATGCTAGCCGGATGTACAACGACCTATACCATGACGACCCGGACGGGAGAGATTATTGAAACGCAGGGTAAGCCGGAGGTTGACACCGCAACCGGAATGACGAAATACGCTGATGTTTATGGTTATCATCGCGTTATGAAAACCAGTGAAATAGTGCAGACGACAGAAGGCGCATCGAAGCTGGACTGGTAA	78	MQKCSLITVLSLSVLMLAGCTTTYTMTTRTGEIIETQGKPEVDTATGMTKYADVYGYHRVMKTSEIVQTTEGASKLDW	Y	Conserved in Enterobacteriaceae	1247.11	1158.29	4200	1463.27	1495.99	813.29	6382.68	1065.3
man-49	STM14_2059	1809335	1809514	+	213	180	ATGTCTGATATCGAAGCACAACGAATTGCCGCACGCATTGATACCGTGCTGGATATCCTTGTTGCTGGCGATTACCACTCGGCCATCAATAACCTTGAAATATTGAGAGCAGAGCTGTTAGATCAGGTTAAAGACGGTATCTCGCCATCCCAGGCTCCCGGGTCGCCCTGGGAAATCTGA	59	MSDIEAQRIAARIDTVLDILVAGDYHSAINNLEILRAELLDQVKDGISPSQAPGSPWEI	N	Conserved in Enterobacteriaceae	3297.41	3050.16	10859.4	7108.62	6738.53	7709.95	12515.1	11532.8
man-50	STM14_2071	1818504	1818647	-	171	144	GTGGTCGCGCCCCCGATTCAATCTGGTGACGATGATAACACCCCGGATACGACCGTTTTTCGGTCTGTTCCGCAACACTGGACGCCCACACCGCAGCAGCGGGCATTTATTGATGCTTTTGCTGACGAGGTGTCACAAAAATAA	47	MVAPPIQSGDDDNTPDTTVFRSVPQHWTPTPQQRAFIDAFADEVSQK	N	Conserved in Enterobacteriaceae	1101.36	3594.83	4047.21	2989.61	7256.88	8031.2	14359.1	18507.1
man-51	STM14_2083	1827469	1828089	-	621	621	ATGAGCCAGTTTTTTTATATCCATCCGGATAACCCACAGCAACGGCTGATTAATCAGGCCGTCGACATTGTGCGTAAAGGCGGTGTTATTGTTTATCCAACCGATTCCGGCTATGCCCTTGGTTGTAAAATTGAAGACAAAGGCGCAATGGAGCGCATTTGCCGCATCCGTCATCTGCCGGACGGCCACAACTTCACGCTGATGTGCCGCGATTTGTCCGAGTTGTCGACCTACTCCTACGTCGACAACGTGGCATTTCGTCTGATGAAAAACAATACGCCGGGTAATTACACCTTTATCCTGAAGGGGACAAAAGAGGTGCCGCGCCGTCTGTTGCAGGAAAAGCGTAAAACTATCGGCCTGCGCGTACCGTCAAACCCGATTGCGTTGGCGTTATTG…	206	MSQFFYIHPDNPQQRLINQAVDIVRKGGVIVYPTDSGYALGCKIEDKGAMERICRIRHLPDGHNFTLMCRDLSELSTYSYVDNVAFRLMKNNTPGNYTFILKGTKEVPRRLLQEKRKTIGLRVPSNPIALALLDTLGEPMLSTSLMLPGSDFTESDPEEIKDRLEKQVDLIIHGGYLGQQPTTVIDLTNDSPVVLREGVGDVTPFL	N	Conserved in Enterobacteriaceae	6907.1	10697.6	13304.9	13181.2	7482.25	9808.15	9358.07	9463.88
man-52	STM14_2170	1904271	1905545	+	1326	1275	ATGGATAAGTTATCTTACGCTTCAGATAGCAGCACATCTGCCTGGAATACCTACCTGCAACAAATCGAGCGTGTGGCCCCTTATCTGGGCGAGTTATCCCCCTGGGTGGATACTCTGCGCCACCCAAAACGCGCTCTGATCGTCGATATTCCGGTACAAATGGATGATGGCACTATTCGTCATTTCGAAGGATATCGCGTGCAGCACAACCTCTCCCGAGGTCCGGGTAAAGGCGGTGTTCGCTACCATCCTGACGTTGATCTCAATGAAGTGATGGCCCTGTCAGCATGGATGACCATCAAATGTGCCGCGCTGAACCTGCCATACGGCGGCGCTAAAGGCGGTATCCGCGTCGATCCGTTCTCGCTGTCGGAAGGTGAACTGGAGCGTTTGACCCGC…	424	MDKLSYASDSSTSAWNTYLQQIERVAPYLGELSPWVDTLRHPKRALIVDIPVQMDDGTIRHFEGYRVQHNLSRGPGKGGVRYHPDVDLNEVMALSAWMTIKCAALNLPYGGAKGGIRVDPFSLSEGELERLTRRYTSEIGIIIGPQKDIPAPDVGTNGKVMAWMMDTYSMNHGTTVTGVVTGKPIHLGGSLGREKATGRGVFVSGLEAARRANIAVEGARVAVQGFGNVGSEAARLFAGAGARVVAIQDHTATLFNATGIDMKALTAWQTEHKQIAGFPGAETIASDAFWRLEMDILIPAALEGQITRQRAEALTCKLVLEGANGPTYPDADDVLASRGILVVPDVVCNAGGVTVSYFEWVQDMASFFWSEEEINARMDKIMTDAIVHVWEKAAEKSCS…	N	Conserved in Enterobacteriaceae	246694	20804.6	34872.9	44443.2	187952	15979.2	21492.3	31870.2
man-53	STM14_2181	1914999	1916531	+	1527	1533	ATGGCAATGATTGATTCCATGAACAAGGACACCACACGTTTGAGCGATGGACCCGACTGGACATTTGAGCTGCTGGATGTCTATCTGGCAGAGATAGACCGCGTGGCGAAGCTCTACCAACTGGATACTTACCCGCACCAAATTGAAGTCATCACTTCCGAACAGATGATGGACGCCTACTCCAGCGTCGGGATGCCGATCAACTATCCGCACTGGTCGTTTGGCAAAAAGTTCATTGAGACGGAACGTCTGTATAAGCATGGTCAACAAGGACTGGCTTATGAAATTGTGATCAACTCTAATCCCTGCATTGCCTACCTGATGGAAGAGAACACCATCACCATGCAAGCGCTGGTCATGGCGCACGCCTGTTACGGCCACAACTCCTTTTTTAAAAAT…	510	MAMIDSMNKDTTRLSDGPDWTFELLDVYLAEIDRVAKLYQLDTYPHQIEVITSEQMMDAYSSVGMPINYPHWSFGKKFIETERLYKHGQQGLAYEIVINSNPCIAYLMEENTITMQALVMAHACYGHNSFFKNNYLFRSWTDASSIVDYLIFARNYITRCEERYGVDEVEKLLDSCHALMNYGVDRYKRPQKISLQEEKARQKSREEYLQSQVNMLWRTLPKREEEKTVAEARRFPAEPQENLLYFMEKNAPLLEPWQREILRIVRKVSQYFYPQKQTQVMNEGWATFWHYTILNHLYDEGKVTERFMLEFLHSHTNVVFQPPYNSPWYSGINPYALGFAMFQDIKRICQSPTDEDKYWFPDIAGSDWLETLHFAMRDFKDESFISQFLSPKVMRDFRF…	N	Conserved in Enterobacteriaceae	1866.89	66.51	3529.18	1084.29	4138.67	704.11	6218.68	2360.61
man-54	STM14_2192	1922357	1922650	-	333	294	ATGTTTTGTGTGATCTATAGAAGTAGCAAGCGCGATCAAACCTATTTGTATGTCGAAAAAAAAGACGATTTTTCGCGGGTGCCTGAAGCGTTGATGAAAGGATTCGGTCAGCCGCAGTTAGCGATGATGCTGCCGCTTGATGGACGTAAAAAATTAGTCAATGCCGAGCTCGAAAAAGTAAAACAGGCGTTAAGCGAGCAGGGCTATTATTTACAATTGCCGCCGCCGCCGGAAGATTTGCTGAAACAACATCTTTCTTCGGTAGGACAAAATACGTCGCCCGCTGACCGTTAA	97	MFCVIYRSSKRDQTYLYVEKKDDFSRVPEALMKGFGQPQLAMMLPLDGRKKLVNAELEKVKQALSEQGYYLQLPPPPEDLLKQHLSSVGQNTSPADR	N	Conserved in Enterobacteriaceae	13486.1	20248.4	19665.2	24730.4	9774.57	7342.81	12659.5	15839.4
man-55	STM14_2216	1943549	1944115	+	621	567	ATGCACTTTACTGCTACTGTTCTTCTCGCTTTCGGCATGTCGATGGATGCTTTCGCGGCATCAATTGGCAAAGGCGCCACCCTACATAAACCCAAATTCTCAGAAGCGTTGCGTACCGGTCTTATCTTTGGCGCGGTTGAAACGCTAACCCCGTTGATCGGCTGGGGGCTGGGGATATTGGCGAGTAAATTCGTTCTGGAATGGAACCACTGGATAGCCTTTGTTCTGCTGATCTTTCTGGGCGGACGCATGATCATCGAAGGTATCCGCGGCGGTAGTGATGAAGATGAAACACCGTTACGTCGTCACAGCTTTTGGCTATTAGTCACGACGGCTATCGCGACCAGCCTCGATGCGATGGCGGTTGGCGTCGGTCTGGCGTTTTTGCAGGTAAACATC…	188	MHFTATVLLAFGMSMDAFAASIGKGATLHKPKFSEALRTGLIFGAVETLTPLIGWGLGILASKFVLEWNHWIAFVLLIFLGGRMIIEGIRGGSDEDETPLRRHSFWLLVTTAIATSLDAMAVGVGLAFLQVNIIATALAIGCATLIMSTLGMMIGRFIGPMLGKRAEILGGVVLIGIGVQILWTHFHG	Y	Conserved in Enterobacteriaceae	152.57	2296.26	163.73	453.45	1086.06	5983.03	1170.8	1880.09
man-56	STM14_2234	1955391	1955888	-	585	498	ATGAGCAAAACAGAACTATACGCGGCGTTAAACCGCGATTTTCAGTCGTTAATGGCAGGTGAAACCAGCTTTCTGGCCACGCTGGCGAATACCAGCGCGCTACTGTTCGAACGCCTTACCGAGGTGAACTGGGCGGGATTTTATCTCCTCGAAGGCGATACGCTGGTGTTGGGGCCGTTTCAGGGGCGAATCGCCTGTGTGCGGATTCCGGTTGGTCGCGGCGTGTGTGGCGCAGCGGTAGCGCAGAATAAGGTTCAACGTATTGATGATGTTCATGCGTTTGACGGCCATATTGCCTGTGATGCCGCCAGCAACGCCGAAATTGTGCTGCCTGTCACGGTTGGCGAACGGATTATCGGCGTGCTGGATATAGATAGCACGGCGTTTGGCCGTTTTACC…	165	MSKTELYAALNRDFQSLMAGETSFLATLANTSALLFERLTEVNWAGFYLLEGDTLVLGPFQGRIACVRIPVGRGVCGAAVAQNKVQRIDDVHAFDGHIACDAASNAEIVLPVTVGERIIGVLDIDSTAFGRFTEEDEHGLRTLVAQLETVLATTDYKKFFASVAG	N	Conserved in Enterobacteriaceae	19243.1	25309.5	32498.5	37520.2	21695.7	20707	33762.6	37065.8
man-57	STM14_2252	1967613	1967888	+	174	276	ATGCCATTTTCAATCAAAAACATATGTTCAGGTCCAAAAGGACATTGCCCAGAAATCTCCAGCCCTATACAGGACAAGCCAGTACCGAGGAATTGCACACTGACCTCAACAACATGCGATATACAGAGCTATACAGTATTCAGCAGATGGTCCTGCAGTTATGAAATGCGCCCACCCGGTGCAGAAGAAAGAACCCCACGACTAAAATTCTCAGCAACGGAGCTCTCATGGCTATCTAAAACAATAGAAACAGAGAGGCGCAACACAAAAGAATGA	91	MPFSIKNICSGPKGHCPEISSPIQDKPVPRNCTLTSTTCDIQSYTVFSRWSCSYEMRPPGAEERTPRLKFSATELSWLSKTIETERRNTKE	N	Conserved in Enterobacteriaceae	6129.32	1847.14	21975.5	4051.14	1081.77	558.69	7886.01	2591.84
man-58	STM14_2346	2036100	2036903	-	903	804	GTGGCAGAACCGTTAACCGTATCCCCCGAACTCACTGCGAACTATGCGTATTTTTTTGACCTTGATGGCACATTGGCAGAGATAAAGCCTCATCCCGATCAGGTAGTGGTACCGCATAAAATCCTTCAGTTGTTAGACCGTCTCGCGGCGCACAACGCAGGGGCACTGGCATTGATTTCAGGGCGTTCAATGACTGAGCTGGATGCTTTGGCGAAGCCTTTTCGCTTTCCACTCGCTGGCGTTCACGGGGCAGAGCGTCGTGACATCAATGGTAAAACCCATATCGTGCGCCTTCCTGAAGCGGTAGTCCGTGAGGTAGAGGCGTTATTACGTTCGACGCTTGTAGCGCTGCCCGGAACGGAGCTGGAGTCGAAGGGGATGGCATTTGCGCTGCACTAC…	267	MAEPLTVSPELTANYAYFFDLDGTLAEIKPHPDQVVVPHKILQLLDRLAAHNAGALALISGRSMTELDALAKPFRFPLAGVHGAERRDINGKTHIVRLPEAVVREVEALLRSTLVALPGTELESKGMAFALHYRQAPEHEAALLALAQHVTQHWPQLALQPGKCVVEIKPKGTNKGEAIAAFMQEAPFAGRIPVFVGDDLTDEAGFGVVNHAGGISVKVGVGATQAAWRLESVPDVWRWLEQINYPQQEQQVMNNRRDGYESFSRSI	N	Conserved in Enterobacteriaceae	4145.43	448.74	5683.53	1323.76	7009.31	911	7444.63	2738.99
man-59	STM14_2359	2046185	2046469	-	333	285	GTGAAATATACCGATAATGCAAAATTATTTATTAGCTTCATTAATATTGGGATTGTAGGTTGCGCTTTGCTACTTTTTTTTATTTTGTATGAGCCTGAGAGTGCAATCGTAACCTACTCTTTTCCAGGAGAGCTTTCCTCTTCGACATGTGATGCGCGTAATTTTATTGGCTACGTCGATGAAAACGACTTTGCAGAGTATATAAAAAAAGTAGAACTGACGCGCTACAGTATGTATTGTCTGAAAAAAACAGGGGCGGGTCAGTGGAGTATTTATGCAAATTAA	94	MKYTDNAKLFISFINIGIVGCALLLFFILYEPESAIVTYSFPGELSSSTCDARNFIGYVDENDFAEYIKKVELTRYSMYCLKKTGAGQWSIYAN	N	Conserved in Enterobacteriaceae	978.05	2064.02	19272.8	2097.97	2357.12	3246.3	26576.7	6693.31
man-60	STM14_2385	2065207	2066412	+	1266	1206	ATGTCATGGCAACACTTCAAGCAAACCTGGTTAATTAAATTCTGGGCGCCGGCCCCTGCGGTGATCGCAGCCGGTATTCTCTCTACCTACTATTTTGGCATCACCGGCACGTTTTGGGCCGTGACGGGCGAATTTACCCGCTGGGGCGGGCAAATTTTGCAGCTTTTTGGCGTTCATGCCGAACAGTGGGGCTACTACAAGCTGATTCATCTGGAAGGTACGCCGCTGACGCGTATCGACGGCATGATGATCCTCGGCATGTTCGGCGGCTGTTTCGCCGCGGCGCTGTGGGCCAACAACGTAAAACTGCGTATGCCGCGCAGCCGAATCCGTATCGTACAGGCGGTGGCCGGAGGCATTATCGCTGGCTTCGGCGCGCGTCTGGCGATGGGGTGTAAC…	401	MSWQHFKQTWLIKFWAPAPAVIAAGILSTYYFGITGTFWAVTGEFTRWGGQILQLFGVHAEQWGYYKLIHLEGTPLTRIDGMMILGMFGGCFAAALWANNVKLRMPRSRIRIVQAVAGGIIAGFGARLAMGCNLAAFFTGIPQFSLHAWFFALATAIGSWFGARFTLLPIFRIPVKMQKVSAASPLTQKPDQARRRFRLGMLVFIGMIGWALLTAMHQPKLGLAMLFGVGFGLLIERAQICFTSAFRDLWISGRAHMAKAIIFGMAVSAIGIFSYVQLGVAPKIMWAGPNAVIGGLLFGFGIVLAGGCETGWMYRAVEGQVHYWWVGLGNVIGSTILAYYWDDFAPALATSWDKVNLLNTFGPLGGLLVTYLLLFTALMLIIGWEKRFFRRAGLTPAKE…	N	Conserved in Enterobacteriaceae	1739.47	6080.8	526.01	1755.09	1732.99	6153.26	1633.31	3244.92
man-61	STM14_2409	2083025	2083210	-	219	186	ATGGTCTTTTCTGTCAGTGAGGAAGTTACCGTGAAAGAGGGTGGGCCCCGGATGATCGTCACCGGTTATTCCAGCGGAATGGTAGAGTGTCGCTGGTATGATGGTTTTGGCGTAAAGCGGGAGGCATTCCATGAGAATGAGCTCGTGCCAGGCAAGGAAAGGCGCGTGCGGGACGAAGCCCGATGA	61	MVFSVSEEVTVKEGGPRMIVTGYSSGMVECRWYDGFGVKREAFHENELVPGKERRVRDEAR	N	Conserved in Enterobacteriaceae	16161.9	3036.1	16831.2	4532.63	40230.5	7461.24	33350.2	20134.7
man-62	STM14_2462	2118324	2118581	-	360	258	ATGCAAGATGGTAAACAGCAGCCTTATTTTTTTAACCCTGGCATGACGCCCGAACAACTTGAAGACTGGTTAGGGCAGCAAAAACTTCACCTGACCTACTATAATCAACTGGTAAATGAAAAAGCCGCCCTTGAGGAACGGCTAAATGAGATTTCAGCAGAAATTGAACGAATGTCTGCTGGTGGTTTTAAAGGAAAACTGAGTTTTCTCTGGGATCCCAGTCCGCTTCCGAGAAATCGTCAACAGAATAATGATTGA	85	MQDGKQQPYFFNPGMTPEQLEDWLGQQKLHLTYYNQLVNEKAALEERLNEISAEIERMSAGGFKGKLSFLWDPSPLPRNRQQNND	N	Conserved in Enterobacteriaceae	4517.22	5016.04	10814.8	21112.7	5424.58	4258.4	10545.2	23051.2
man-63	STM14_2474	2126125	2126775	+	696	651	ATGAAAATTGCTGAGCTAGCAGAAGCCATCGGCGTGGATGCCGCAAACATCTCTCGTCTGGAGACTGGCAAGCAAAAGCAATTTACCGAACAAACACTTTCTAGGCTGGCTGACTGCTTAGGTGTTGATATAGCAGAACTCTTTACCTCAGACCCAAAAGGTAATACTGTATGTAAACACAGTGATATGAGGAAGGATTCAGCTAACGTGAAGGATTTGTTCCGTATCGAGATACTGGATGTCAGTGCAAGCGCCGGTAATGGACTCATTCAGGGCGGTGATGTTATCGATGTAATCCATGCTATCGAATATAACAAGGACAAAGCACTAGCTATGTTCGGTGGGCGCCCTGCCGCTGAGCTTAAAGTGATTAACGTGCGCGGTGACAGCATGGCACCA…	216	MKIAELAEAIGVDAANISRLETGKQKQFTEQTLSRLADCLGVDIAELFTSDPKGNTVCKHSDMRKDSANVKDLFRIEILDVSASAGNGLIQGGDVIDVIHAIEYNKDKALAMFGGRPAAELKVINVRGDSMAPTIEPGDLIFVDISINQFDGDGIYVFGFDDKIYVKRLQMIPDKLLVISDNTNYREWSITKDNECRFGVFGKVLISQTQSLKRHN	N	Conserved in Enterobacteriaceae	4610.31	8276.99	9427.71	13648.4	10519.9	10895.8	17134.8	27147.9
man-64	STM14_2483	2132392	2132619	+	243	228	ATGAGCGATCGCTTCCTGACTGAGGAGGAACTGGAAGATGCTACAGGAGCAAGCCAGAAGTCACTCCAGAAAGAAGTATTAACGCTGAACGGTATTTATTTTATAGAACGCCGGGACGGTTCAATCAGAACAACCTGGTATCATATAAATCACCCAGTTTCGCGCCTTCTTCCACCAGCAGGGTATCAGCCTGTACCAGGCATGAATTTTGACGCTATAGAGAGTTAA	75	MSDRFLTEEELEDATGASQKSLQKEVLTLNGIYFIERRDGSIRTTWYHINHPVSRLLPPAGYQPVPGMNFDAIES	N	Conserved in Enterobacteriaceae	168.63	103.2	384.55	603.17	654.76	507.23	1575.13	3875.72
man-65	STM14_2500	2145928	2147352	-	1458	1425	TTGAACGTCTCCACTGCCTTACGCCAGGCTGTCGTCCGTACGCCCTGGTATGCCAAACGCAAGAGCTACAAAGTGTTGTTCTGGCGTGAAATCACCCCACTTGCTATCCCTATTTTTCTGGAAAATACCTGTGTTTTGCTAATGGGCGTGCTCAGTACTTTTCTCGTCAGTTGGCTGGGCAAGGAAGCAATGGCGGGCGTGGGGCTTGCCGACAGTTTTAATATGGTAATTATGGCTTTTTTTGCGGCTATCGATCTTGGTACTACGGTGGTGGTCGCCTTTAGCCTCGGCAAGCGCGACAGGCGACGCGCAAGGGCGGCGGCGCGCCAGTCGCTGGTGATTATGACGCTATTTGCCGTTGTGCTGGCAGTGGTCATTCATTATTTCGGCAGTGAAATT…	474	MNVSTALRQAVVRTPWYAKRKSYKVLFWREITPLAIPIFLENTCVLLMGVLSTFLVSWLGKEAMAGVGLADSFNMVIMAFFAAIDLGTTVVVAFSLGKRDRRRARAAARQSLVIMTLFAVVLAVVIHYFGSEIINIVAGEATPEVKGLALTYLELTVLSYPAAAIALIGSGALRGAGNTKIPLMINGGMNILNIIISSILIYGAFSWQGLGFAGAGLGLTISRYIGAVAIIWVLMIGFNPALRIPLKSYLKPLNFGIIWEVMGIGIPASIESVLFNGGKLLTQMFVAGMGTNVIAGNFIAFSVAALINLPGNALGSASTIITGKRLGTGQIGQAERQLRHVFWMSTIVLTAIAWGTAPFAGLFASFYTQEQDVKEVVKVLLWLNAAFMPIWAAAWVLPS…	N	Conserved in Enterobacteriaceae	655.97	368.77	571.85	516.1	1885.7	973.89	1191.37	1131.96
man-66	STM14_2549	2185617	2185697	-	132	81	GTGCTACTGGCAACGATTTTATCCCCGAACCTTCAGGTTTCCCCAGACGGCGACGTAACGGTGTTTCCTCTGGCGGCTTGA	26	MLLATILSPNLQVSPDGDVTVFPLAA	N	Salmonella-specific	296.66	290.49	636.73	664.36	7832.82	17609.2	25258.6	20606.7
man-67	STM14_2560	2197379	2198737	-	1365	1359	ATGTCGCATAACGTTACTCCAAACACCTCTCGCGTGGAATTACGTAAAACGCTTACGTTAGTTCCGGTTGTAATGATGGGTCTTGCCTATATGCAGCCGATGACGCTGTTCGATACATTTGGTATCGTTTCAGGCCTCACTGACGGTCACGTACCGACGGCGTATGCATTCGCGTTAATCGCGATTCTGTTTACGGCGTTGAGCTACGGGAAACTGGTGCGTCGCTACCCTTCCGCGGGTTCGGCGTATACCTATGCCCAGAAATCCATCAGCCCGACCGTTGGCTTTATGGTGGGTTGGTCTTCTCTGCTCGATTATCTGTTCGCGCCGATGATCAACATTCTGTTGGCGAAAATTTATTTTGAAGCGCTGGTGCCCTCCATTCCGTCATGGGTGTTT…	452	MSHNVTPNTSRVELRKTLTLVPVVMMGLAYMQPMTLFDTFGIVSGLTDGHVPTAYAFALIAILFTALSYGKLVRRYPSAGSAYTYAQKSISPTVGFMVGWSSLLDYLFAPMINILLAKIYFEALVPSIPSWVFVVALVAFMTAFNLRSLKSVANFNTVIVVLQVVLIAVILGMVVYGVFEGEGAGTLASTRPFWSGDAHVIPMITGATILCFSFTGFDGISNLSEETKDAERVIPRAIFLTALIGGLIFIFATYFLQLYFPDISRFKDPDASQPEIMLYVAGKTFQVGALIFSTITVLASGMAAHAGVARLMYVMGRDGVFPKSFFGYVHPKWRTPAMNIILVGAIALLAINFDLVMATALINFGALVAFTFVNLSVISQFWIREKRNKTLKDHFQYLF…	N	Conserved in Enterobacteriaceae	7115.21	93524.7	22964	38422.7	12179.5	146895	42065.3	56374.1
man-68	STM14_2677	2318937	2319506	+	597	570	ATGGATATCAACACGCTTATTACGCATTATGGCTATGCGGCGCTGGTTATCGGCAGTATGGCCGAAGGTGAAACCGTTACCCTGTTGGGGGGCGTCGCGGCGCATCAGGGATTGCTCAAGTTTCCGCTGGTGGCGGCGGCTGTCGCGCTGGGAGGGATGATGGGCGATCAGCTACTTTATCTGTTAGGACGATGCTATGGCGGGAAGATCCTGCGTCGTTTCCCCCGTTATCATACGAAGATTCGTCGCGCGCAGAAAATGATCCAACGCCATCCGTATCTGTTTGTGATCGGCACGCGTTTTATGTACGGCTTCCGGGTGGTTGGCCCGCTGCTGATTGGCGCCAGCCGCCTGCCGCCTAAAATTTTTCTGCCGCTGAATATTGTAGGCGCGCTGATC…	189	MDINTLITHYGYAALVIGSMAEGETVTLLGGVAAHQGLLKFPLVAAAVALGGMMGDQLLYLLGRCYGGKILRRFPRYHTKIRRAQKMIQRHPYLFVIGTRFMYGFRVVGPLLIGASRLPPKIFLPLNIVGALIWALLFTTLGYLGGEVIAPWLHDLDQHLRHGVWLILAIVLVVGVRWWLKRRGKAEAR	N	Conserved in Enterobacteriaceae	784.13	275.2	941.02	461.55	2553.55	743.94	3112.07	1550.29
man-69	STM14_2733	2362277	2362849	+	711	573	ATGCCAAGAGCGAACGAAATCAAAAAAGGTATGGTACTGAACTACAACGGCAAATTGCTGATTGTGAAAGATATCGACATTCAGTCGCCTACCGCCCGTGGCGCCGCCACACTGTATAAAATGCGTTTTTCCGATGTCCGCACAGGTCTGAAAGTGGAAGAACGTTTCAAAGGCGACGATATCGTTGATACCGTCACCCTGAGCCGTCGCGGCGTTGACTTTTCTTATGTCGATGGCAACGAATATGTGTTCATGGATAAAGAAGACTATACGCCGTATACCTTCACCAAAGATCAGATTGAAGAAGAGTTGCTGTTTATGCCTGAAGGCGGAATGCCGGATATGCAGGTTCTGACCTGGGACGGCCAACTGCTGGCGCTAGAGCTTCCGCAGACCGTG…	190	MPRANEIKKGMVLNYNGKLLIVKDIDIQSPTARGAATLYKMRFSDVRTGLKVEERFKGDDIVDTVTLSRRGVDFSYVDGNEYVFMDKEDYTPYTFTKDQIEEELLFMPEGGMPDMQVLTWDGQLLALELPQTVDLEIVETAPGIKGASASARNKPATLSTGLVIQVPEYLSAGEKIRIHIEERRYMGRAD	N	Conserved in Enterobacteriaceae	10287.1	29087.1	29297.9	34508.3	6057.35	13657.2	17928.9	21174.3
man-70	STM14_2809	2431091	2431786	+	885	696	ATGAAAAATAGATTAAAGCGTGACTTTAGTCACATATCAATTGAAATACCCAAATCCATCACCCAGGTGATTAAAGAGAAAATAAGGGAGATGATTATCCATGGCGATTTCGATCTTGGGCAAGCGATCAGTGAAAATGAACTATCAAATATTCTGATGGTAAGTAAAACACCAATTCGTGAAGCTTTTATTTGGCTGAGCTATAATGAAAACTTAGTCAACATCATTCCCCGCAGTGGGACATTTGTTTTTTCTGTCACCGACGAGGATATCAATGATCTCATCAAAATGAGGGTTATCCTTGAACAGGGCGCAATTCGTGAAGCGATGGAGAAAAATGCTAACAATGTCATAGTCGAATTAAGCAATATTTTATCGAAGTCAGCAAAAATTAATGCA…	231	MKNRLKRDFSHISIEIPKSITQVIKEKIREMIIHGDFDLGQAISENELSNILMVSKTPIREAFIWLSYNENLVNIIPRSGTFVFSVTDEDINDLIKMRVILEQGAIREAMEKNANNVIVELSNILSKSAKINAERDTQAYLKLDHDFHYVFVKYADNKYISQAHLLISARLLAIRYRLDFTAEYITSSNRGHATILDMLKNNNVEGVCNFITHHIGSGFTERARKLLALKA	N	Conserved in Enterobacteriaceae	514.43	439.49	318.64	395.18	589.84	221.55	515.99	463.52
man-71	STM14_2831	2453329	2453871	-	648	543	ATGAAAAAAAGCATATTATTAGGTTTTGCCGGAATGCTGTTCGTTTCTGCATCGGCGCAGGCCATCAGTATTAGCGGCCAGGCGGGCGAAGATTACACCAACATTGGCGTGGGTTTTGGTACGGAATCGACGGGACTGGCGCTAAGCGGCAACTGGATGCACAACGATGATGATGGCGATGCTGCGGGCGTGGGTCTGGGGCTGAACATTCCGGTGGGACCGCTGCTGGCGACGGTCGGCGGTAAAGGTATTTATACCAATCCGAAAGACAGCGATGAAGGCTATGCGGCGGCTGTCGGCGGTGGGCTACAATGGAAAATCGGCAACAGCTTCCGTCTGTTCGGCGAGTATTATTATTCACCAGATTCGCTGTCCAGCGGTATCGACAGTTATGAAGAA…	180	MKKSILLGFAGMLFVSASAQAISISGQAGEDYTNIGVGFGTESTGLALSGNWMHNDDDGDAAGVGLGLNIPVGPLLATVGGKGIYTNPKDSDEGYAAAVGGGLQWKIGNSFRLFGEYYYSPDSLSSGIDSYEEANAGARFTIMRPLSIEAGYRYLNLAGKDGNRDNAIADGPYVGVNASF	Y	Conserved in Enterobacteriaceae	5376.82	16177.6	4008.23	10020.4	6804.4	15618.7	4409.2	9557.6
man-72	STM14_3073	2673510	2673824	+	330	315	ATGAGAGATATTGAGAAAGAAATTATCGATTTTATCGATCAGGAATATAACACTAAAAAGTACTTTCTCTGTGGGCCAAAGCGAATCATCACGCTTGATACCAGTATTAGGGATGATCTTAAACTCGTTTTTGAAGATAGTGAAGAACTTCTACAAAAGTACTTCAAGCGTTGGAATGTAGATTCAGAAGGATTTGACATACTCAACTATCTGAATCCAGAGTACTTTGGAAGTAAAGAGCCTGATCCGCGTAAGCCACTAACGGTTGGTATGCTCGTTGAAAGTGCTAAAGCTGGGCGTTGGTTATATAGTTGA	104	MRDIEKEIIDFIDQEYNTKKYFLCGPKRIITLDTSIRDDLKLVFEDSEELLQKYFKRWNVDSEGFDILNYLNPEYFGSKEPDPRKPLTVGMLVESAKAGRWLYS	N	Conserved in Enterobacteriaceae	305.14	473.09	851.4	227.78	947.84	1284.99	1278.28	979.62
man-73	STM14_3096	2710094	2710150	-	123	57	TTGTCGACTTTAAGGCAGTATGTAATGGTGCAACAAGAGTTTAGCCTTGTGTCTTAG	18	MSTLRQYVMVQQEFSLVS	N	Conserved in Salmonella and Klebsiella oxytoca	632.36	1238.41	5609.92	524.49	17678.4	16231.5	17756	13534.3
man-74	STM14_3166	2782957	2783430	+	546	474	ATGTTTACAATTAATAGTACTAACAGGGTGGCGAGCACAATCGCTCCATATGCATGTGTAAGCGATGTTAATTTAGAGGACAAGGCTACATTTTTAGATGAACATACCTCAATACATGCGAATGATTCTTCTTTGCAATGCTTTGTCTTAAATGATCAGCATGTTCCGCAGAATACATTAGCTACAGATGTTGAAGGCTACAATAGAGGATTACAGGAACGTATAAGCCTCGAGTACCAGCCCCTGGAAAGCATTGTTTTTCTACTCGGCACCCCTGCAGTTTTAGAGACTAAAGAGTCTTTATCATTACCAGTTTCCCCGGATGCTTTAACCCAAAAACTATTAAGCATTAGTAGCAATGATGAATGTAAATTATCAGGTAGCACCAGTTGCACTACC…	157	MFTINSTNRVASTIAPYACVSDVNLEDKATFLDEHTSIHANDSSLQCFVLNDQHVPQNTLATDVEGYNRGLQERISLEYQPLESIVFLLGTPAVLETKESLSLPVSPDALTQKLLSISSNDECKLSGSTSCTTPASHNPPSGYIAQYRHSAEVFPDE	N	Conserved in Enterobacteriaceae	2337.07	1919.45	49747.1	3216.67	1732.2	1219.93	31546	2278.55
man-75	STM14_3167	2784599	2784769	+	228	171	ATGATTTTAATATTACCATCTTCACTATATTCTGCTCTTACAATAGCGGCAGACTCTCAAGATCATAAAAAAGAAGAAACAATTAAGCCAATGCCTCAAAAGTGGTGTAATCTTTGGCCTGCTGGCATACCCTTCCCTGAAGATTGGTTTAAAATGTGTAGAGGTTATTGA	56	MILILPSSLYSALTIAADSQDHKKEETIKPMPQKWCNLWPAGIPFPEDWFKMCRGY	Y	Conserved in Enterobacteriaceae	2473.24	2843.76	172490	11189.2	1855.14	901.75	128683	6890.17
man-76	STM14_3293	2879775	2880212	-	477	438	ATGCCTCAGATTAGTCGGACTGCTTTAGTCCCCTACAGTGCGGAACAGATGTATCAGTTAGTGAATGACGTGCAATCGTATCCCCAGTTTTTGCCTGGGTGTGTTGGTAGTCGCGTCCTGGAGTCATCGCCAGCACAGATGACGGCGGCTGTTGACGTGTCGAAGGCGGGTATCAGCAAGACGTTTACGACGCGTAATCAGCTAACGCGTAACCAGAGCATTCTGATGCATCTGGTGGATGGCCCCTTTAAAAAGCTGATCGGCGGCTGGAAATTTACCCCGCTCAGCCCCGAGGCGTGCCGTATTGAGTTTCAGCTTGATTTTGAGTTTACCAATAAACTCATTGAGCTGGCGTTTGGTCGTATATTCAAAGAGTTAGCGTCCAACATGGTGCAGGCG…	145	MPQISRTALVPYSAEQMYQLVNDVQSYPQFLPGCVGSRVLESSPAQMTAAVDVSKAGISKTFTTRNQLTRNQSILMHLVDGPFKKLIGGWKFTPLSPEACRIEFQLDFEFTNKLIELAFGRIFKELASNMVQAFTVRAKEVYRAG	N	Conserved in Enterobacteriaceae	10769.5	21398.8	16190.8	21132	12355.2	13466	13541.2	18733.9
man-77	STM14_3305	2900723	2901862	+	1194	1140	GTGGAAAACGATAAGGTGAAGTTAGGAAGAAATGATAAATGCTGGTGCAAATCAGGACTTAAGTATAAAAAATGCCATCTCGATCGAGACCGTGAAATGCCGGTATCTAAAGCCGAAGCCCTGAAATTTTCAAAGTCTAATTCGCAGAGAAAGGCGTGTTATGCACCAGCATCCATGCACGAAGATTGTGACAAACGTATCGTTCAGGCGCACACGCTTTCTAAGAGCAGTAGCCTTAAGGCGATCGCCGACTCTAGTAATCATGTTATGGGAGTGGTAATGAACCTGCCGAGCCTGATAAAAAACAACGGAAGATGGGTTCCAGAGAAGATTGGTATCAATCAGGCATCCACTTTTACCGGATTTTGTGCAGTTCATGACAGAATATTATTTTCATGT…	379	MENDKVKLGRNDKCWCKSGLKYKKCHLDRDREMPVSKAEALKFSKSNSQRKACYAPASMHEDCDKRIVQAHTLSKSSSLKAIADSSNHVMGVVMNLPSLIKNNGRWVPEKIGINQASTFTGFCAVHDRILFSCLENEKFTGTDEQCFALMFRSLSKEIYAKEGGRRSSDFAKNADKGKLQAEQVYIQEFVSLHQSGLNAAITELNNLKTSLDRILLNRQFSEIESVVFTFSEPLPIAVSSILSPERDFDGTKIQDLNDLTVSAEQVCFNAFSSEGKGYVVFSWLGTSAIIRRFVRSLIKVQTDRIFNTLLYFFFTKAENTYSSPEWWDSLSDKQRENIGNMIMSGVDFFDNSTLRVDHSVDYNSAALAEIRYSNSEISS	N	Conserved in Enterobacteriaceae	3899.56	5896.21	3954.09	4563.09	3371.99	4480.56	2797.04	3715.77
man-78	STM14_3306	2902197	2903009	-	828	813	ATGGATGATATCTCATTATCTATTGCTAGAAACATGTTTCATCTCCAAGTCTATGAGTCTGACGGAGTTCGCTTTGAGGACTTGTTTTCAAAAATAATGTACTATAAGTCGCCAGATTTTCAGCAGGTGAAGCCTTATGGAAATATTGGAGACAGAAAGAATGATGGTTTTATTAAGGGGCAGGGGGTATATTATCAGGTGTATGCACCAGAAGATGCATCTAATAATGTACTAGCTGCTGTTAATAAAATAAAAGATGATTTTGAAGGGTTAAGGGATTACTGGCATGATATATGTCCTATTAAAAAATATTACTTTGTCTTAAATGATAAATATAAGGGTTCCTTACCGCAGTTGCACAAGGAATTAATTGTTTTGCAAAGTGATTTTAACTTAATT…	270	MDDISLSIARNMFHLQVYESDGVRFEDLFSKIMYYKSPDFQQVKPYGNIGDRKNDGFIKGQGVYYQVYAPEDASNNVLAAVNKIKDDFEGLRDYWHDICPIKKYYFVLNDKYKGSLPQLHKELIVLQSDFNLIDTGVIVAKDLERELFNLPDDMIRSVVGHLPDIDHEEYMFVSGFTCFISAWINFEKIARHKVFSAKQPNRPLFIGKVVNALVKNKIISRQDATFIKKITEVRNSLVHGVSMLVPKKNEIDMLIFITEKIKPAGVCRLD	N	Conserved in Enterobacteriaceae	1761.59	1572.51	2524.83	2029.84	1859.17	1588.46	2074.81	2760.43
man-79	STM14_3313	2908598	2908888	-	357	291	GTGATTGGTAAAAGATTAAAGATTTCAAGAGTCAGGGCTGATCTGACGCAAGCGGAACTGGGTGCACTCGCTGGGCTGGATGAAGAATCCGCAAGCGCGCGTATCAGTTCGTATGAAAAGGAAGTCCATGCACCCGATTTCAAACTCGTCTGTAAGCTGGCAGCAGCGCTTGATGTACCGGAAGCGTATTTTTATGCTGTTGACGATGAGCTTGCAGAATTGATCCTCCAGTATCACCGTTTTAAGAAAAATAACCCCGGAAGTACATTGATATTGTCTGGTAATATATGA	96	MIGKRLKISRVRADLTQAELGALAGLDEESASARISSYEKEVHAPDFKLVCKLAAALDVPEAYFYAVDDELAELILQYHRFKKNNPGSTLILSGNI	N	Conserved in Enterobacteriaceae	4467.38	8651.84	4023.21	4808.03	3911.66	4504.1	5048.67	5109.28
man-80	STM14_3319	2912685	2913836	+	1203	1152	ATGTCCCTCCCTACAAATTTTAATGATATTCTTCGTTTTTTTGAAAAAGATTACGATACAGCCAAAGAAGATAATGCTTTAAGTGCACGCGGCCAATTTCTGCAACTTTACCCCCTTAATCACCTAAAAAAAATGACGCTTGATGACTATGTCATCGGCAAAGGTACAGCTTCATTTTGTGCTTGTGTTGAAGTAAAAACCAGAACATGGGCAAATATGCAAGGTGCGACGGCGCTCAAATTTGGTATTTATTATGGAAAATCAAAATCAGATCCAACCGTCCGCTATCGTTTTACTCAGAAATTTGGCGATGATGATATTACTAATAAAGAAGTTTTCGCTAATGTTAAAGACGCTTTACTAGACCTAATACAGTCAGGGAAAGAATTAGATTTTAGA…	383	MSLPTNFNDILRFFEKDYDTAKEDNALSARGQFLQLYPLNHLKKMTLDDYVIGKGTASFCACVEVKTRTWANMQGATALKFGIYYGKSKSDPTVRYRFTQKFGDDDITNKEVFANVKDALLDLIQSGKELDFRAIDENPLSQMFKAKILSLYFPEHFINICSKDHLKEIAMEMGIKEQQFISKYQHLLFKKKLEHKITRNWSNPKYMSFLYAQFIRKDLSSAPAVIVKKPQKRNHPEVNFEEITDNRDLIGKKSEEYALNWEKNRLIGLGYSKLAEEIDDRRNRPTYGYDFLSFNAPGDERYIEVKSIGRDGKEGAFRFFLSGNELTVSNLSNHSKNYYFYLVQYGKDGEPCNLYVKHAQDLYTNSEMSPCAYVVRFDLEEPA	N	Conserved in Enterobacteriaceae	3176.85	1259.55	1575.91	3903.1	2235.38	1070.83	1558.72	3336.15
man-81	STM14_3329	2923839	2925161	-	1284	1323	ATGGACATTAATAGTAGAGAGTATGCTTTTGTTATATGGATGTTAATAATCATTGCTCTGCTTTGGTGTAAAAAGGATATTAGAGATTCTTTTTATCAACTTATCAAAACATTTTTCCATAAACAAATTTTGACAGTATTAGGATTTGCGGTTGTTTGGACGTCTATTTGTATTGTGCTTTTTTATGAAATTGGTGTTTGGAGTACAGATAATCTTAAGACCACTTTGGTATGGGTAATTACATATGCTTTCGTAACAATCTTTGAAACACATAAAATAAAGAGCAGTAAGTATTATTTTAAATCACAAATCAAAGAAACGATTGGATTAAGTGCTCTACTTACATTTATTCTTGAACTACAAAGTTTTTCCTTTGCTATAGAGTTTATAATATACCCT…	440	MDINSREYAFVIWMLIIIALLWCKKDIRDSFYQLIKTFFHKQILTVLGFAVVWTSICIVLFYEIGVWSTDNLKTTLVWVITYAFVTIFETHKIKSSKYYFKSQIKETIGLSALLTFILELQSFSFAIEFIIYPIMLFLGLLAVVANTKKETEKIGATIKVVLGVFVIFYFAHSFFVSIMSPSVTFSWANLTELLTPVLLSFSFMPFIYMLYLYQAYETKLLGLKIYFDDEALFNYAKKLAICFFRTDLDALNRWVRNIHINEIKTKEGIKASLKDVKLRKKIESNPPEVDNKYGWSPFLAKDFLVGKGVDTNDYHFSFDTWISCSHMIEIGNDGLFRDSVAYYLYGDEYAAKKLKLRANINNSPISNCSKNTISLLAEELISKALGDDDFNINELFSKI…	N	Conserved in Enterobacteriaceae	368.71	349.78	526.28	280.21	521.87	582.76	600.48	466.49
man-82	STM14_3374	2966365	2966481	+	300	117	ATGTATGCTTTGCGGTTCGCCAAAAACCAGCGCAGGCGAACTGGCGCGCATTACCGGGCTAAGCCCCTCCGCGACGTCGCAACATCTGGCGCGGATGCGGGAAGAAGGGCTGATTGA	38	MYALRFAKNQRRRTGAHYRAKPLRDVATSGADAGRRAD	N	Conserved in Enterobacteriaceae	985.84	1541.84	1675.09	1533.13	1594.92	2635.88	1116.17	1558.49
man-83	STM14_3383	2969556	2969882	+	339	327	ATGCTTAACAAACCGAACCGAAACGACGTCGATGATGGTGTTCAGGATATTCAGAATGATGTCAATCGATTAGCCGACAGTCTGGAAGATGTCCTTAAATCCTGGGGAAGCGATGCGAAAGACGAAGCCGAGGCTGCGCGACGTAAAGCACAGGCGTTGCTGAAAGAGACCCGGGCGCGGATGCAGGGTCGTACTCGCGTAAAACAAGCCGCCTGTGATGCGATGGGGTGCGCGGATACGTTTGTGCGTGAAAAACCCTGGTGTAGCGTAGGAACCGCCGCAGCGGTGGGGATTTTTATCGGGGCGCTGCTTAGCCTGCGTCGCTAA	108	MLNKPNRNDVDDGVQDIQNDVNRLADSLEDVLKSWGSDAKDEAEAARRKAQALLKETRARMQGRTRVKQAACDAMGCADTFVREKPWCSVGTAAAVGIFIGALLSLRR	N	Conserved in Enterobacteriaceae	81488	4677.17	52095.6	10221.4	41544	3300.9	24194.9	8836.22
man-84	STM14_3475	3040159	3041754	+	1662	1596	ATGGACGGCTCCCTGCTACGCTCAGAAAAGAAAGTCAATATTCCGCCAAAAGAATATGCCGTTCTGGTCATCCTGCTCGAAGCCGCCGGCGAGATTGTGAGTAAAAACACCTTACTGGACCAGGTATGGGGCGACGCGGAAGTTAACGAAGAATCTCTTACCCGCTGTATTTATGCCTTACGACGTATTCTGTCGGAAGATAAAGAGCATCGTTACATTGAAACACTGTACGGACAGGGCTATCGGTTTAATCGTCCGGTCGTAGTGGTGTCTCCGCCAGCGCCGCAACCTACGACTCATACATTGGCGATACTTCCTTTTCAGATGCAGGATCAGGTTCAATCCGAGAGTCTGCATTACTCTATCGTGAAGGGATTATCGCAGTATGCGCCCTTTGGC…	531	MDGSLLRSEKKVNIPPKEYAVLVILLEAAGEIVSKNTLLDQVWGDAEVNEESLTRCIYALRRILSEDKEHRYIETLYGQGYRFNRPVVVVSPPAPQPTTHTLAILPFQMQDQVQSESLHYSIVKGLSQYAPFGLSVLPVTITKNCRSVKDILELMDQLRPDYYISGQMIPDGNDNIVQIEIVRVKGYHLLHQESIKLIEHQPASLLQNKIANLLLRCIPGLRWDTKQISELNSIDSTMVYLRGKHELNQYTPYSLQQALKLLTQCVNMSPNSIAPYCALAECYLSMAQMGIFDKQNAMIKAKEHAIKATELDHNNPQALGLLGLINTIHSEYIVGSLLFKQANLLSPISADIKYYYGWNLFMAGQLEEALQTINECLKLDPTRAAAGITKLWITYYHTG…	N	Conserved in Enterobacteriaceae	8883.17	260.46	193.89	996.54	9073.05	628	334.12	984.31
man-85	STM14_3479	3044345	3044569	-	261	225	ATGGCTGCAATATATGATGATATTGCTGACAGTTCGCGTTTTGTTATTAAAGGCAAGTTACGTCATGTTGAAAATGATCCGAAGGAGCTGCTGATATGTGTTCCGATGCGTAGTGAATGGCTATTCTACTGGATTAAAGGAGAGAAATATTGCGCCCGGCGATGGGCGCGAAAAAGTATCAAGACATTGTGTAACCAGATTAAATTTGAAGAAGCAATCTTATAA	74	MAAIYDDIADSSRFVIKGKLRHVENDPKELLICVPMRSEWLFYWIKGEKYCARRWARKSIKTLCNQIKFEEAIL	N	Conserved in Enterobacteriaceae	6642.89	9795.36	13707.5	6085.51	13601.5	13963.6	11269.6	14899.2
man-86	STM14_3505	3067578	3067859	+	291	282	ATGCCTCAGATAGCTATAGAATCTAACGAAAGGCTGTCGTTACGTGTATCGACGGATGCCAAAAAGTTGATAGTCCGCGCTGCGGCAATCCAGCAAACCAACCTGACGGATTTTGTGGTCAGTAACATACTACCTGTCGCACAGAAGATTGTTGATGCCGCCGAACGGGTATATCTGACGGAGCGCGATACTAAAATGATCATGGAAATTTTAGATAACCCGCCAGCGCCGAATGAAAAGCTTCTTGCCGCTGCTTTCGCCCTGCCGGACATGAAGAAATGA	93	MPQIAIESNERLSLRVSTDAKKLIVRAAAIQQTNLTDFVVSNILPVAQKIVDAAERVYLTERDTKMIMEILDNPPAPNEKLLAAAFALPDMKK	N	Conserved in Enterobacteriaceae	8810.9	13572.7	13625.3	9520.1	5756.98	8680.53	10805.5	7460.86
man-87	STM14_3514	3074833	3075744	+	933	912	ATGCTCAATTTGCAGCGTATGTCGCTGTTTATCGCCGTGGTAGATAGCGGCAGCTTCACGGCCGCCGCCGCCGCATCGGGCCAAACAAAAGCGGTAGTGAGTTTTAATATTCGGCAGCTTGAAAAAGAGCTTGGCGTAACGTTACTGCTACGTTCCACCCGACGATTGACGCTCACAGACGCCGGCGTCCTCTTTTACCAAAAAGGCGTGAATTTACTCAACGCAGCGAAAAATTTGCAGGATGAAGTGCGTGCCAGCCATAGTGGGCTGGGCGGCGAGTTACGTATTACCACTACGCCCGAGTTTGGCGAACAGGTGATCATTCCGTTACTGGCGCAGTTTAGTCAGCGCCATCCCGATCTCCGTATTCGGCATATGTCCTCATCACATCATGCCGAT…	303	MLNLQRMSLFIAVVDSGSFTAAAAASGQTKAVVSFNIRQLEKELGVTLLLRSTRRLTLTDAGVLFYQKGVNLLNAAKNLQDEVRASHSGLGGELRITTTPEFGEQVIIPLLAQFSQRHPDLRIRHMSSSHHADLIAERFDVAIRLGSLADSRYRAALISRFTILPVAAPQWLARNPVSSLESLAQAEWIIHERLPTPLRWTVTSNHGQHSRLEISKAGKISVDSARSLMAFALAGSGVALLPQWLVNTALEDGTLIHVLPDYHFPRQGIYAVYPDARHVSTKVRAFIDFLRSQWDCGEHAPSS	N	Conserved in Enterobacteriaceae	445.29	455.8	571.17	478.6	6342.95	549.5	978.49	799.75
man-88	STM14_3536	3092213	3092536	-	357	324	ATGCGTAATAGCCATAACATTACTTTCACAAGGTCAGACGCCTTCATGGTCGACGATGACGCCACCAGTGCATTTCCGGGGGCGGTGGTCGGCTTTGTGTCATGGCTGCTGGCGTTGGGGATCCCTTTTCTGCTTTATGGCCCTAACACGCTGTTTTTTTTCCTCTATACCTGGCCCTTTTTCCTCGCGTTAATGCCGGTATCGGTGATTATCGGCATTGCGTTGCATCTGCTGGTAAAGGGCAAAATACTTTTTAGCATCATGTTTACTCTACTGGCCGTAGGCGCGCTGTTCGGCGCGTTATTTATATGGCTATTAGGGTAG	107	MRNSHNITFTRSDAFMVDDDATSAFPGAVVGFVSWLLALGIPFLLYGPNTLFFFLYTWPFFLALMPVSVIIGIALHLLVKGKILFSIMFTLLAVGALFGALFIWLLG	N	Conserved in Enterobacteriaceae	845.49	508.36	2626.51	3044.97	4261.98	2201.14	19817.2	24199.9
man-89	STM14_3584	3143467	3144222	+	816	756	GTGGCTGCTCATCTGCTTATCGTCGACGCGCTCAATTTGATTCGCCGTATTCACGCCGTTCAGGGATCGCCCTGTGTGGAAACCTGCCAACACGCGCTCGATCAATTGATTATTCACAGCCAGCCAACCCATGCCGTAGCGGTATTTGATGACGACGCGCGCAGCAGCGGCTGGCGTCATCAGCGTTTGCCGGACTACAAAGCAGGACGTCCGCCGATGCCTGACGATTTACATAATGAAATGCCCGCCCTACGCGCCGCATTTGAACAGCGCGGCGTACGCTGTTGGGCATCAGACGGTAACGAAGCGGACGATCTGGCGGCGACGCTGGCGCTAAAAGTTACCGAAGCCGGACACCAGGCAACCATTGTGTCAACCGATAAAGGCTATTGCCAGTTG…	251	MAAHLLIVDALNLIRRIHAVQGSPCVETCQHALDQLIIHSQPTHAVAVFDDDARSSGWRHQRLPDYKAGRPPMPDDLHNEMPALRAAFEQRGVRCWASDGNEADDLAATLALKVTEAGHQATIVSTDKGYCQLLSPGLRIRDYFQKRWLDAPFIEKEFGVLPRQLPDYWGLAGISSSKVPGVAGIGPKSATQLLIQFQNLEGIYAHLDEVPEKWRKKLETHKEMAFLCRDIARLQTDLHIDGNLQQLRLAR	N	Conserved in Enterobacteriaceae	902.7	2147.56	1801.04	1961.44	2887.94	4538.27	3469.22	3951.89
man-90	STM14_3648	3201735	3202190	+	483	456	ATGCAACATGACGCCATACAACGTCGCTCGCTGCCGGAGCGTATTTTCCATGCTGTCTGTTTTGAAGGTATTGCGACTGCGATACTGGCGCCAACGACCGCCTGGCTAATGCAGCGCTCGGTGCTGGAGATGGGCGGCCTGACGATATTGCTGGCAACGACGGCCATGATCTGGAATATCATTTATAACGCTCTGTTTGATCGACTGTGGCCCGCGCATCAGGTGAGACGAACCGCCAAAGTGCGCGCACTCCATGCGTTAGGATTTGAAAGTGGGTTTATTGTCATTGGCGTCAGTATTGTCGCTTGGGTACTGAATGTCAGCCTGCTACAAGCATTCACCCTGGAAATTGGTTTCTTCCTGTTCTTTTTGCCGTACACGATGCTGTACAACTGGGCA…	151	MQHDAIQRRSLPERIFHAVCFEGIATAILAPTTAWLMQRSVLEMGGLTILLATTAMIWNIIYNALFDRLWPAHQVRRTAKVRALHALGFESGFIVIGVSIVAWVLNVSLLQAFTLEIGFFLFFLPYTMLYNWAYDVLRQRIVTRRQQRVSA	N	Conserved in Enterobacteriaceae	1659.95	24991.8	1391.17	930.97	1514.12	10778.7	2243.36	1168.87
man-91	STM14_3664	3214693	3214920	-	378	228	ATGCACACAACACTTTTTTTTAGTAACCGGACCCAGGCAGTCAGATTGCCTAAATCGATATCCTTTCCGGAGGATGTGAAACATGTCGAAATCATTGCGGTTGGCAGAAGCAGAATCATTACTCCAGTCGGAGAATCCTGGGACAGCTGGTTCGATGGCGAAGGCGCCAGTACTGATTTTATGAGTACCAGAGAACAACCCGCAGTACAGGAACGGGAAGGATTTTGA	75	MHTTLFFSNRTQAVRLPKSISFPEDVKHVEIIAVGRSRIITPVGESWDSWFDGEGASTDFMSTREQPAVQEREGF	N	Conserved in Enterobacteriaceae	23544.9	27210.6	25380.4	37763.5	11049	13864.4	17326.4	21777.9
man-92	STM14_3698	3241441	3242037	+	549	597	ATGACGCAACTTCCCGAACTCTCTTTATCACGACAAGAAATCCGCCGGATGATTCGGCAACGTCGCCGTGCGCTAACGCCAGAGCAGCAACGCCGTTTTGGTCAACAGGCCGCCGCCCGAATGCTCAGCTTTCCTCCCGTCGTGATGGCGCACACTGTCGCCGTGTTTCTCTCCTTTGATGGCGAACTCGACACCCAGCCGCTGATTGAACAGCTATGGCGAGCGGGCAAGCGCGTCTACCTTCCGGTTCTTCATCCCTTCAGCCCTGGCAACCTCCTGTTCCTGCACTATTATCCGCAGAGTGTGCTGGTGACCAACCGCTTAAAGATTCAGGAGCCACGGCTTGATGTCCGCGACGTATTGCCGCTGGCAAAGCTGGATGTGCTGGTAACGCCGTTA…	198	MTQLPELSLSRQEIRRMIRQRRRALTPEQQRRFGQQAAARMLSFPPVVMAHTVAVFLSFDGELDTQPLIEQLWRAGKRVYLPVLHPFSPGNLLFLHYYPQSVLVTNRLKIQEPRLDVRDVLPLAKLDVLVTPLVAFDEDGQRLGMGGGFYDRTLQNWQQHKILPVGYAHDCQLVEKLPVKEWDIPLPAVVTPSKIWEW	N	Conserved in Enterobacteriaceae	644.01	1116.71	1079.88	1101.7	3657.09	5488.66	5322.86	6108.66
man-93	STM14_3766	3294633	3295013	-	435	381	ATGATAATTGACAGAATTGATCACCTTGTATTAACGGTATCTGATATATCAACCACAATAAGATTCTACGAAGAGGTACTTGGTTTTTCTGCGGTAACATTTAAACAAAACAGAAAAGCGTTAATATTTGGAGCGCAAAAAATTAACCTCCATCAGCAAGAAATGGAGTTCGAACCAAAAGCGAGTAGACCAACGCCGGGATCTGCCGATTTATGTTTTATTACATCGACACCGATAAATGATGTTGTGTCTGAGATCTTACAGGCAGGCATTTCCATTGTTGAAGGCCCGGTTGAGAGAACTGGAGCCACAGGCGAGATAATGTCTATCTACATCAGGGACCCTGATGGAAACTTAATTGAAATTTCGCAGTATGTTTAA	126	MIIDRIDHLVLTVSDISTTIRFYEEVLGFSAVTFKQNRKALIFGAQKINLHQQEMEFEPKASRPTPGSADLCFITSTPINDVVSEILQAGISIVEGPVERTGATGEIMSIYIRDPDGNLIEISQYV	N	Conserved in Enterobacteriaceae	1210.95	1770.39	2152.35	1333.95	1812.18	3288.37	1856.63	1288.52
man-94	STM14_3827	3339246	3340433	+	1323	1188	ATGACGGATAAACAGTTGGATACCAAACTGGTAAACGCAGGACGCAGCAAAAAATACACGCTTGGCTCAGTGAATAGTGTGATTCAACGCGCTTCTTCACTGGTGTTTGACACCGTCGAGGCCAAAAAACACGCTACCCGCAATCTCGCCAACGGCGAATTATTTTACGGACGCCGGGGAACGCTGACCCACTTTTCGCTCCAGGAAGCCATGTGTGAACTGGAAGGCGGCGCCGGATGCGCGCTCTTCCCGTGCGGCGCGGCGGCGGTCGCCAACACCATTCTGGCATTCGTTGAGCAGGGCGACCACATCCTGATGACCAACACAGCTTATGAACCCAGCCAGGATTTCTGCAGCAAAATTCTCGGCAAACTGGGCGTGACGACAAGCTGGTTCGAC…	395	MTDKQLDTKLVNAGRSKKYTLGSVNSVIQRASSLVFDTVEAKKHATRNLANGELFYGRRGTLTHFSLQEAMCELEGGAGCALFPCGAAAVANTILAFVEQGDHILMTNTAYEPSQDFCSKILGKLGVTTSWFDPLIGADITQHIQPNTKVVFLESPGSITMEVHDIPSIVSAVRRVAPEAVIMIDNTWAAGVLFKALEFDIDISIQAGTKYLIGHSDAMVGTAVANARCWEQLRENAYLMGQMLDADTAYMTSRGLRTLGVRLRQHQESSLKIAAWLANHPQVARVNHPALPGSKGHAFWKRDFTGSSGLFSFVLNKKLTEAELSAYLDNFSLFSMAYSWGGYESLIIANQPEQIAAIRPAGGVDFTGTLVRVHIGLESVDDLIADLAAGFARIV	N	Conserved in Enterobacteriaceae	1820.43	1511.87	3117.08	4162.3	2026.27	1671.14	3893.22	3518.41
man-95	STM14_3849	3359050	3359709	+	813	660	ATGCGAATTTTACTGGTAGAAGATGACACACTTATTGGCGATGGCATAAAAGCGGGCCTGAGTAAAATGGGTTTCAGCGTCGACTGGTTTACCGAGGGACGTCCGGGCAAAGAGGCGCTTTACAGCGCGCCTTATGATGCGGTTATTTTAGATTTGACGCTGCCAGGCATGGACGGACGGGATATTTTGCGCGAATGGCGCGAAAAGGGTAAACAGGAACCGGTACTGATCCTGACGGCGCGCGACGCGTTAGCAGAGCGCGTCGAGGGGCTACGTCTGGGCGCCGATGACTATTTATGTAAACCTTTCGCGCTCATTGAGGTCGCCGCCCGTCTGGAGGCGCTGGTACGCCGCGCCAGCGGTCAGGCCAGTAGCGAATTGCGCCACGGCCAGGTGACG…	219	MRILLVEDDTLIGDGIKAGLSKMGFSVDWFTEGRPGKEALYSAPYDAVILDLTLPGMDGRDILREWREKGKQEPVLILTARDALAERVEGLRLGADDYLCKPFALIEVAARLEALVRRASGQASSELRHGQVTLNPGNLVATLAGEPLALKPKEFALLELLLRNKGRVLPRKLIEEKLYNWDDDVSSNAVEVHVHHLRRKLGSEFIRTVHGIGYTLGDA	N	Conserved in Enterobacteriaceae	1114.11	1509.23	3579	2482.28	1470.22	1577.04	2638.23	2507.75
man-96	STM14_3870	3377194	3377493	+	414	300	ATGATTGACCCGAAAAAAATTGAGCAAATCGCACGCCAGGTTCATGAGTCAATGCCGAAAGGTATTCGCGAGTTCGGGGAAGATATCGAGAAAAAAATCCGTCAAACGCTGCAATCTCAGCTGACGCGTCTCGATCTGGTGAGCCGCGAAGAGTTTGATGTCCAGACTCAGGTCTTGCTGCGCACCCGGGAAAAACTGGCGCTGCTGGAGCAACGCCTCAGCGAACTGGAAGCTCGCGACAAGCCTGAAGAAGTAAAACCTGCGCCCGCCATTCCGCCAGTCGATCCACAACAAGAGTAA	99	MIDPKKIEQIARQVHESMPKGIREFGEDIEKKIRQTLQSQLTRLDLVSREEFDVQTQVLLRTREKLALLEQRLSELEARDKPEEVKPAPAIPPVDPQQE	N	Conserved in Enterobacteriaceae	17693.9	30980.9	29896.4	26667.3	5224.95	4625.97	16070.1	14400.5
man-97	STM14_3896	3402958	3404337	+	1407	1380	TTGAACAGGTTACCTTCCAGCGCATCGGCTTTGGCCTGTAGCGCGCACGCACTGAATCTCATCGAGAAGCGAACGCTAAACCATGAGGAAATGAAAGCACTAAACCGAGAGGTCATTGACTACTTTAAAGAGCATGTAAATCCAGGATTTCTGGAATACCGGAAATCTGTTACCGCCGGCGGGGATTACGGAGCCGTAGAGTGGCAAGCGGGCAGTTTGAATACGCTTGTCGACACCCAGGGGCAGGAGTTTATCGACTGTCTTGGGGGGTTTGGCATCTTTAACGTGGGGCACCGTAATCCTGTTGTGGTATCCGCCGTCCAGAATCAACTCGCAAAACAACCTCTCCACAGCCAGGAGTTACTTGATCCCTTGCGGGCGATGCTGGCAAAAACGCTG…	459	MNRLPSSASALACSAHALNLIEKRTLNHEEMKALNREVIDYFKEHVNPGFLEYRKSVTAGGDYGAVEWQAGSLNTLVDTQGQEFIDCLGGFGIFNVGHRNPVVVSAVQNQLAKQPLHSQELLDPLRAMLAKTLAALTPGKLKYSFFCNSGTESVEAALKLAKAYQSPRGKFTFIATSGAFHGKSLGALSATAKSTFRRPFMPLLPGFRHVPFGNIDAMSMAFSEGKKTGDEIAAVILEPIQGEGGVILPPQGYLTEVRKLCDEFGALMILDEVQTGMGRTGKMFACEHENVQPDILCLAKALGGGVMPIGATIATEEVFSVLFDNPFLHTTTFGGNPLACAAALATINVLLEQNLPAQAEQKGDTLLDGFRQLAREYPNLVHDARGKGMLMAIEFVDNE…	N	Conserved in Enterobacteriaceae	2510.93	215.97	2474.11	1533.8	3204.75	432.99	3036.11	1605.92
man-98	STM14_3914	3416291	3416683	+	486	393	ATGAAAAAATTAGAAGATGTTGGTGTACTGATAGCGCGTATTTTAATGCCAGTTCTGTTTATTACCGCAGGATGGGGAAAAATTAGCGGCTATGCGGGCACACAGCAGTATATGGAAGCGATGGGCGTACCAGGATTCCTGCTGCCGCTCACCATACTGCTTGAGTTCGGCGGCGGTCTGGCGATTCTGCTGGGGTTCCTCACCCGCACCACTGCGCTTTTCACCGCTGGTTTTACGTTGCTGACGGCATTGATCTTCCATAGCAATTTTGCAGAAGGTGTAAACTCGCTGATGTTTATGAAAAACCTGACCATTGCCGGCGGATTCTTATTACTGGCGTTAACCGGGCCTGGCGCGTTCAGCCTTGACCGTCTGCTGAATAAAAAGTGGTAA	130	MKKLEDVGVLIARILMPVLFITAGWGKISGYAGTQQYMEAMGVPGFLLPLTILLEFGGGLAILLGFLTRTTALFTAGFTLLTALIFHSNFAEGVNSLMFMKNLTIAGGFLLLALTGPGAFSLDRLLNKKW	N	Conserved in Enterobacteriaceae	207.89	359.23	118.11	121.71	142.45	686.64	276.91	392.6
man-99	STM14_3976	3475036	3475374	-	528	339	TTGATTATGTACGAAGCTCTTTTAGTTGTTTTCCTTATTGTGGCAATTGGCCTTGTAGGTCTGATCATGCTGCAGCAAGGTAAAGGCGCTGATATGGGAGCCTCCTTCGGAGCAGGCGCTTCCGCTACGCTATTTGGTTCAAGTGGTTCTGGTAACTTCATGACCCGAATGACGGCGGTATTGGCGACGCTGTTCTTCATCATCAGTCTGGTGTTGGGTAATATCAATAGCAACAAAACCAATAAAGGAAGCGAGTGGGAAAATCTGAGTGCGCCGGCGAAGACCGAGCAGACTCAACCTGCTGCACCGGCCCAGCCGACCAGCGATATCCCGCGCTAA	112	MIMYEALLVVFLIVAIGLVGLIMLQQGKGADMGASFGAGASATLFGSSGSGNFMTRMTAVLATLFFIISLVLGNINSNKTNKGSEWENLSAPAKTEQTQPAAPAQPTSDIPR	N	Conserved in Enterobacteriaceae	48534.4	108834	60262.2	74361	153578	329834	180833	197735
man-100	STM14_3992	3487243	3488214	+	1146	972	ATGAATTTAGAAAAAATCAACGAGTTAACCGCGCAAGATATGGCGGGTGTCAATGCGACAATCCTTGAACAGCTTAATTCCGACGTTCAACTGATTAATCAGCTAGGATATTACATTATTAGCGGCGGCGGAAAACGCATTCGTCCGATGATTGCCGTTCTTGCCGCGCGCGCGGTGGGTTATCAGGGTAACGCGCACGTGACTATCGCCGCTCTGATCGAGTTTATCCACACGGCGACGCTGCTACATGATGATGTGGTGGATGAATCCGATATGCGTCGCGGCAAAGCGACGGCAAATGCCGCTTTCGGTAATGCCGCCAGCGTGTTGGTCGGCGACTTTATCTATACCCGCGCCTTCCAGATGATGACCAGCCTCGGCTCGTTAAAAGTGCTGGAA…	323	MNLEKINELTAQDMAGVNATILEQLNSDVQLINQLGYYIISGGGKRIRPMIAVLAARAVGYQGNAHVTIAALIEFIHTATLLHDDVVDESDMRRGKATANAAFGNAASVLVGDFIYTRAFQMMTSLGSLKVLEVMSEAVNVIAEGEVLQLMNVNDPDITEENYMRVIYSKTARLFEAAAQCSGILAGCTPEQEKGLQDYGRYLGTAFQLIDDLLDYSADGEHLGKNVGDDLNEGKPTLPLLHAMRHGTPEQSAMIRTAIEQGNGRHLLEPVLEAMTTCGSLEWTRQRAEEEADKAISALQILPDTPWREALIGLAHIAVQRDR	N	Conserved in Enterobacteriaceae	8499.41	17066.3	12177.5	18620.5	14916.9	22209.7	18731.2	25383.2
man-101	STM14_3995	3490104	3490358	-	294	255	ATGGAAAATCATGAAATTCAGAGTGTGCTGATGAATGCCCTCTCCCTCCAGGAAGTCCACGTCTCCGGCGATGGCAGTCACTTTCAGGTTATTGCCGTGGGCGAGATGTTTGACGGCATGAGCCGGGTCAAGAAACAGCAAACGGTCTATGGGCCGCTAATGGAGTACATTGCGGACAACCGTATCCATGCCGTATCGATCAAAGCATATACCCCGGCGGAATGGGCGCGCGATCGTAAACTTAACGGATTTTAA	84	MENHEIQSVLMNALSLQEVHVSGDGSHFQVIAVGEMFDGMSRVKKQQTVYGPLMEYIADNRIHAVSIKAYTPAEWARDRKLNGF	N	Conserved in Enterobacteriaceae	18469.9	40538.9	22369.4	25183	13611.2	25170.7	13400.6	16061.6
man-102	STM14_4031	3523043	3523825	-	792	783	ATGAACGCATTTGATTCGCAAGCAGAAGATTCTCCGACATCCCTCGGGCGTAGTTTGCGCCGCCGCCCGCTGGCGCGTAAAAAACTGTCTGAAATGGTTGAGGAAGAGCTGGAGCAGATGATCCGCCGTCATGAGTTTGGCGAGGGAGAACAGCTACCGTCTGAACGTGAATTAATGGCCTTCTTCAATGTGGGACGTCCCTCCGTGCGTGAAGCGTTAGCTGCGCTGAAGCGTAAAGGTCTGGTGCAAATCAATAACGGCGAACGCGCCCGCGTCTCGCGCCCCTCCGCTGATACCATCATCAGTGAACTGTCGGGTATGGCGAAAGATTTTCTTACTCATCCTGGCGGCATCGCTCACTTTGAACAGCTACGGCTTTTCTTTGAATCCAGCCTGGTA…	260	MNAFDSQAEDSPTSLGRSLRRRPLARKKLSEMVEEELEQMIRRHEFGEGEQLPSERELMAFFNVGRPSVREALAALKRKGLVQINNGERARVSRPSADTIISELSGMAKDFLTHPGGIAHFEQLRLFFESSLVRYAAEHATDEQIALLTKALEINSQSLDDNALFIRSDVEFHRVLAEIPGNPIFMAIHVALLDWLIAARPSVPDRELHEHNNVSYQQHIVIVDAIRQRDPDKADRALQTHLNSVSATWHALGKKSQKMR	N	Conserved in Enterobacteriaceae	2777.38	4617.81	4795.23	4154.14	5743.54	7778.88	8102.95	7362.53
man-103	STM14_4035	3525350	3526144	-	753	795	GTGGGATTTTTTAACTCATTGTTTACTAAGAAAGAGTCGTTAATGCTGTCGAATAAATGGGAATTCTTTATAACAACGGTGGATGACCATGTTACGGGTATACGTGTGGATATCGGCGCCATTCAGGATGAAAAATTTGATCGCCTTATCCATACCGGGTTCTTACGTGTTCATTACACCAACTGTTATGAAAATGGTTTACCGCAGCCCGATGAAACACAGAGTTTAAATCGTATAGAGGACTGGCTTGATGAAAAGGGGAAGACGTTTCCGATCTGGCTGGTGGGTGTGGTTACCCAACAAGGCTGGCGCGATTTTGTGTTCATGTCGGAAGAGGATCTTAACTGGGAAAAGACGCTGGATAAATTGCTCGCTGGTGGCCCGGAAATCTCTTTTAGT…	264	MGFFNSLFTKKESLMLSNKWEFFITTVDDHVTGIRVDIGAIQDEKFDRLIHTGFLRVHYTNCYENGLPQPDETQSLNRIEDWLDEKGKTFPIWLVGVVTQQGWRDFVFMSEEDLNWEKTLDKLLAGGPEISFSYRESHNDKGNFYRQFLYPTRYDWNWIHDSRVCRGLQEQGDDLTLPRAIDYYATLPTEVAARDLAQDIAALPYGITLVSIRMNDPQQGFMASFISTDAPQQWHMTEITCQLTDLAEKHGGSFDGWGAPVVQA	N	Conserved in Enterobacteriaceae	680.09	739.93	570.89	857.4	1032.78	2157.82	944.54	1358.53
man-104	STM14_4168	3626538	3627560	+	1068	1023	ATGGTTGAGATCACGTCCACAGAAATGACCCCGCCTGTCAATAACTCGCATGAATTTATTCCCATGCGTGGCATTCGTAATCGCCATTTACAAACTATGCTGCCGCGTTTAATCCGCCGCAAAGTGAAGTTCAACGCCCACTGGCAGCGGCTGGAGCTACCGGACGGCGATTTTGTCGATCTGGCATGGAGCGAAGATCCGCAACAGGCAAAGTATAAACCGCGGCTGGTGGTCTTTCACGGTCTGGAAGGCAGCCTGAACAGCCCCTATGCCCACGGGCTGATTGAGGCGGCGCAAAAGCGCGGCTGGCTAGGCGTGGTGATGCACTTTCGCGGCTGTAGCGGCGAGCCCAACCGTCTGAATCGTATTTACCACTCCGGTGAAACGGAGGATGGAGCC…	340	MVEITSTEMTPPVNNSHEFIPMRGIRNRHLQTMLPRLIRRKVKFNAHWQRLELPDGDFVDLAWSEDPQQAKYKPRLVVFHGLEGSLNSPYAHGLIEAAQKRGWLGVVMHFRGCSGEPNRLNRIYHSGETEDGAWFLRWLQREFGAVPTAAVGYSLGGNMLACLLAKEGRDIPIEAAVIVSAPFVLEACSYHMDKGFSRVYQRYLLNLLKANASRKLAAYPGSLPVNLAQLKSMRRIREFDDLITAKIHGFADAIDYYRQCSAMPLLNQIAKPTLIIHAKDDPFMDHHVIPKAEDLPPQVEYQLTEHGGHVGFIGGTPLRPEMWLERRIPDWLTTYLEASS	N	Conserved in Enterobacteriaceae	2872.76	4531.15	11278	6300.68	5727.67	6594.53	14191.1	9871.97
man-105	STM14_4225	3681565	3681750	+	915	186	ATGACTATCGCAGACAGATTACGTCAGGAAGGACATCGTAACGGGTTACAGCAAGGCAAGCAGGAAGGCCAACGGCTCGCCGCATTGCGCATTGCCCGCTCCATGCTAAACGATGGTTTCGATCGCGATACCGTGCTTAGGGTTACCGGGCTGGCGCCTGCCGATCTGGCGTCTGAAAACCATTAA	61	MTIADRLRQEGHRNGLQQGKQEGQRLAALRIARSMLNDGFDRDTVLRVTGLAPADLASENH	N	Conserved in Enterobacteriaceae	1731.17	3457.78	4020.64	4404.05	1805.86	4041.51	5733.89	4901.71
man-106	STM14_4248	3704539	3706035	-	1560	1497	ATGAAAAATGCTAATTGGCTTTTTTTGTCAATCATAATGGCGTTTATCGGCGTGCCGCTGCTGGTGAACATTATTACGATTATCGTGGGGGGAATGTGGGCGTACATTAGCGTTCTTGAAAATAGTATCCCCGTCGCGCGATCTATTGAGGAGGCGACCATTATCCCGGTAGCGCTTCTGGGCGCAGGGTTAATTTTTCTTTGTGGCCGGATATGGGGAAAGGGAAATGCATCAGAGGTAAATCCAGAATGGCGTGATTGCTGCCTGCTTATGCCCGCTCTGGTGGTGCTGATGGGGTGGGTCATCCTGATGTTTCTCACCGATCTTAATATTCGCGCGATAGGGTGTAAGCCCATCGCCCAGGTGGTGCAAACGCTTTGGTTAGTACCCCGCGTAATA…	498	MKNANWLFLSIIMAFIGVPLLVNIITIIVGGMWAYISVLENSIPVARSIEEATIIPVALLGAGLIFLCGRIWGKGNASEVNPEWRDCCLLMPALVVLMGWVILMFLTDLNIRAIGCKPIAQVVQTLWLVPRVISFFNGWVWAVLLIPVGSQLCFALGYGGARWGVLRGGAGYTCRNLLVICLLFFGSCAVYQSHLYAVKYPAPESSEYLYFRDYQAHTWGNKLTGLRDEPTLLLTQNWPRLDGATAGLPLYASAFYALTRFPDDICPEDYLENQGTIEAYQNILNGNADLIFVAQPSTAQKQLAEASGVKLVYTPFAREAFVFIVNQNNPVSSLSDVQIRGIFSGRITHWNEVGGEAIDIKPWQRPENSGSQTAMLAKVMKETKLMPAQTTSVATAMGD…	N	Conserved in Enterobacteriaceae	362.77	534.41	503	291.57	2119.1	1480.7	2268.14	1658.44
man-107	STM14_4402	3851900	3852166	-	288	267	ATGAAATCAGATGTTCAACTTAACCTTAGAGCTAAGGAATCGCAGCGGGCGCTCATTGATGCAGCTGCGGAAATCCTTCACAAGTCACGTACAGATTTCATTCTGGAAACGGCCTGCCAGGCTGCCGAGAAAGTGATCCTTGACCGCCGTGTATTTAACTTTAACGATGAGCAATATGAGGAGTTCATCAATCTGCTTGATGCACCGGTCGCAGATGATCCCGTTATCGAAAAACTGCTGGCAAGGAAACCTCAGTGGGACGTGTAA	88	MKSDVQLNLRAKESQRALIDAAAEILHKSRTDFILETACQAAEKVILDRRVFNFNDEQYEEFINLLDAPVADDPVIEKLLARKPQWDV	N	Conserved in Enterobacteriaceae	497.91	259.09	379.46	745.16	4034.71	2315.3	2679.82	4949.26
man-108	STM14_4491	3936372	3937037	-	840	666	ATGGATACGTTGGACGAATTATTGCCGCGTGAAAAAATGCTCAGATCCGGCATTGCTTCCCTCAGCGACGTGGAGCTGCTGGCGCTTTTTTTACGTACCGGCACGCCGGGAAAAGATGTTATGACGTTGGCAAAAGAGATATTGCAGCACTTTGGGTCGCTGTATGGCCTGCTGTCGGCGGACTTTGCGCAGTTTCGCGGCGTAAACGGCATCGGCCTGGCGAAATTCGCGCAGTTGAAAGGCATTGCTGAGCTGGCAAGGCGCTATTACAGCGTGCGCATGAATGAGGAAAGTGCGTTGCTGAGTCCGGAAATGACGCGGGAATTTCTGCAAAGCCAACTGACGGGCGAAGAGCGTGAGATCTTTCTGGTGATCTTCCTCGATGCCCAGCACCGGGTG…	221	MDTLDELLPREKMLRSGIASLSDVELLALFLRTGTPGKDVMTLAKEILQHFGSLYGLLSADFAQFRGVNGIGLAKFAQLKGIAELARRYYSVRMNEESALLSPEMTREFLQSQLTGEEREIFLVIFLDAQHRVLQHSRLFSGTLNHVEVHPREIVREAIKLNASAVILAHNHPSGCAEPSKADKLITERVIKCCQFMDIRVLDHLIIGRGEYVSFAERGWI	N	Conserved in Enterobacteriaceae	2448.74	4033.68	3782.17	1736.82	2576.93	2478.2	4249.43	3139.25
man-109	STM14_4542	3980329	3980538	-	942	210	ATGACGATCGTAGACAGAATACGTGAATCGGGGCGCAGAAAAGGTAAGCGTGAAGGCGTGCAACAAGGCATACAGCAAGGTATACATCAAGGTAAGCAGGAGGAAGCCTTGCGTATTGCGCATACGATGCTGGAACAGGGGATCGAGCGAGAGATGGTGCTGATGATTACCGGGCTTTCTGACGAAGAGATTAAGGCAAAGCGCCATTAA	69	MTIVDRIRESGRRKGKREGVQQGIQQGIHQGKQEEALRIAHTMLEQGIEREMVLMITGLSDEEIKAKRH	N	Conserved in Enterobacteriaceae	950.33	1536.16	2593.32	1812.91	1616.54	2577.24	2766.79	2456.61
man-110	STM14_4802	4215268	4215798	-	516	531	ATGGCAAAAGAGACCATGATACCGCTACTCGCCATTGCCGCGTGGAGCGGCACGGGAAAAACAACACTGCTGAAAAAACTGATCCCAGCACTTTGTGCGCACGGTATTCGGCCAGGGCTGATTAAGCATACCCATCATGATATGGATGTTGATAAACCGGGTAAAGATAGCTACGAATTACGTAAAGCCGGGGCGGCACAGACGCTGGTTGCCAGTCAGCAGCGCTGGGCGTTAATGACTGAAACGCCGGGGCAAGAAGAGTTGGATCTGGCATGGCTGGTGAGCCGGATGGATGCATCAAAGCTAGATATGGTGCTGGTAGAAGGGTTTAAACACGAGGCAGTTGCGAAGATCTTACTTTTTCGTCAGGGATGTGGGCACAGCGAGGAAGAATTAATT…	176	MAKETMIPLLAIAAWSGTGKTTLLKKLIPALCAHGIRPGLIKHTHHDMDVDKPGKDSYELRKAGAAQTLVASQQRWALMTETPGQEELDLAWLVSRMDASKLDMVLVEGFKHEAVAKILLFRQGCGHSEEELILDEHVIAVASDIPLAVAVPVLDLNDVSQISAFILRWLEKARSL	N	Conserved in Enterobacteriaceae	147.55	309.6	294.07	157.35	1555.05	1859.86	1956.98	2645.33
man-111	STM14_4847	4255304	4255531	+	312	228	ATGGCTCAGCATCCAGATTGTGGTGATGTCATTCAGGAAACGGGCGGCCTGAGAAAAATGCGCTGGGGAGCGCGAGGCAAAGGAAAGCGTAGTGGCGTGCGAATTATCTATTTTCACCGTAGTCAACGGTATGAGATTCGCTTGCTTCTGATTTATCAAAAAGGCATTAAAGATGATCTCACGCCGCAGGAAAAAGCGGTGCTTCGTATGCTGAATGAGAGGTGGTAG	75	MAQHPDCGDVIQETGGLRKMRWGARGKGKRSGVRIIYFHRSQRYEIRLLLIYQKGIKDDLTPQEKAVLRMLNERW	N	Conserved in Enterobacteriaceae	1917.13	2700.14	2818.31	3223.77	4180.78	5406.8	4400.65	5212.01
man-112	STM14_4861	4266443	4266991	+	567	549	ATGACACAACCTATTAGCGTCATTGCCAGAAGTCTGGTACGCGAACGCCAGCGAACCGGACTGTCGCTGGCGGAGATTGCGCGGCGCGCAGGCATCGCTAAATCTACGCTTTCACAACTGGAAGCAGGGAACGGCAACCCCAGCCTGGAGACGTTATGGTCGCTATGCGTCGCGCTCGACATTCCCTTTGCCAGGCTGCTGGAGCCGCAGGTACAAAAAACGCAGGTGATTCGCCGCGGAGAAGGCACCAAAGTGGTGGCGGAGCAGGCGCATTATCAGGCGATATTACTGGCGGCGTGTCCGCCCGGCGCGCGGCGTGATATCTATCTGCTGTTGACGCAGCCGGGGGCCGACCGGATCTCTCATCCGCATCCGCCGGGGTCGGTGGAACATATTATT…	182	MTQPISVIARSLVRERQRTGLSLAEIARRAGIAKSTLSQLEAGNGNPSLETLWSLCVALDIPFARLLEPQVQKTQVIRRGEGTKVVAEQAHYQAILLAACPPGARRDIYLLLTQPGADRISHPHPPGSVEHIIVTQGKALVGLTEAPEELAEGDYICYPGDQAHIFKALEPDTQAILVAEQN	N	Conserved in Enterobacteriaceae	1124.31	565.1	980.46	1250.86	1182.48	619.07	869.1	1120.17
man-113	STM14_4863	4267391	4268542	-	1254	1152	GTGATGAGCTTTATGTTGGCACTGCCAAAAATTAGCCTGCATGGCGCTGGAGCGATTGCCGATATGGTGAACCTCGTGGCGAATAAGCAATGGGGCAAAGCGCTGATCGTTACCGATGGTCAACTGGTAAAGCTGGGCCTGCTGGATAGCCTGTTTAGCGCACTGGATGAACATCAAATGTCTTACCACCTGTTTGATGAGGTGTTCCCAAACCCGACAGAAGAGCTGGTGCAGAAAGGTTTTGCGGCGTATCAGAGCGCAGAATGTGACTACATTATCGCCTTCGGCGGCGGCAGCCCGATCGATACCGCAAAAGCGGTGAAAATCCTCACCGCCAACCCTGGCCCTTCCACCGCCTACTCCGGCGTCGGCAAAGTGAAAAACGCCGGCGTACCGCTG…	383	MMSFMLALPKISLHGAGAIADMVNLVANKQWGKALIVTDGQLVKLGLLDSLFSALDEHQMSYHLFDEVFPNPTEELVQKGFAAYQSAECDYIIAFGGGSPIDTAKAVKILTANPGPSTAYSGVGKVKNAGVPLVAINTTAGTAAEMTSNAVIIDSARKVKEVIIDPNIIPDIAVDDASVMLEIPASVTAATGMDALTHAVEAYVSVGAHPLTDANALEAIRLINLWLPKAVDDGHNLEAREQMAFGQYLAGMAFNSAGLGLVHALAHQPGATHNLPHGVCNAILLPIVENFNRPNAVARFARIAQAMGVETRGMSDEAASQEAINAIRTLSKRVGIPEGFSKLGVTKEDIEGWLDKALADPCAPCNPRTASRDEVRGLYLEAL	N	Conserved in Enterobacteriaceae	5505.23	15354.5	35713.7	9783.45	5751.2	11549.6	45056.7	13803.8
man-114	STM14_4888	4288170	4288925	+	891	756	ATGAAAAAAACAGGCTACTTTTTACTGGCGGTGATAGTGATTGTCGCCGCGGCGGGCGTCGGTTACTGGAAATTTTCCGGCAACCCTGATGCATTACGGGAAATCGTGCTTGAACAATGCCTGCCCGATCAGTTACAGCATCAAAACCCAGCGCCGTGCGCGGAAGTCAAACCTCGCGCTGGCTATGTCGTCTTTAAAGATCGTCACGGTCCGTTGCAATATTTATTGATGCCCACCTACCGTATCAACGGTACAGAAAGCCCGCTATTGCTGGAACCCGCTACGCCCAACTTTTTCTGGCTGGCTTGGCAGGCTCGCGGCTATATGAGTAAAAAATACGGGCATGATATTCCGGATAGCGCGGTCTCGCTGGCGATTAATTCGCGGCTTGGTCGTTCA…	251	MKKTGYFLLAVIVIVAAAGVGYWKFSGNPDALREIVLEQCLPDQLQHQNPAPCAEVKPRAGYVVFKDRHGPLQYLLMPTYRINGTESPLLLEPATPNFFWLAWQARGYMSKKYGHDIPDSAVSLAINSRLGRSQDHLHIHISCIRPDVREQLDNDLTRISTRWLPLPGGLMGHEYLARRVTESELAQRSPFMMLAEEVPEARDHMGRYALAVVRQSDDSFVLLATERNLLTFNRASAEEIQDHSCAILSSR	N	Conserved in Enterobacteriaceae	3089.88	11792	7116.45	11089	3340.81	8712.78	9870.85	16967.7
man-115	STM14_4911	4306805	4307815	-	1101	1011	ATGAGACGAGAACTTGCCATCGAATTTTCCCGTGTGACCGAAGCGGCGGCGCTGGCTGGCTACAAATGGCTGGGACGCGGCGATAAAAATACCGCGGACGGCGCGGCGGTCAACGCCATGCGTATCATGCTCAACCAGGTCAACATTGACGGCACCATCGTGATTGGCGAAGGCGAAATCGACGAAGCCCCGATGCTCTATATCGGCGAGAAAGTCGGTACCGGCCACGGCGATGCGGTAGATATCGCCGTCGATCCGATTGAGGGCACGCGCATGACGGCGATGGGTCAGGCGAACGCGCTGGCGGTGCTGGCGGTCGGCGATAAAGGCTGTTTCCTGAATGCGCCCGATATGTATATGGAAAAACTGATTGTCGGTCCGGGCGCCAAAGGGGCAATT…	336	MRRELAIEFSRVTEAAALAGYKWLGRGDKNTADGAAVNAMRIMLNQVNIDGTIVIGEGEIDEAPMLYIGEKVGTGHGDAVDIAVDPIEGTRMTAMGQANALAVLAVGDKGCFLNAPDMYMEKLIVGPGAKGAIDLNLPLADNLRNIADALGKPLGDLTVTILAKPRHDEVIAEMAKLGVRVFAIPDGDVAASILTCMPDSEVDVLYGIGGAPEGVVSAAVIRALDGDMQGRLLARHDVKGNSEENRRIGEQELARCKAMGIEAGKALCLGDMARSDNVIFSATGITKGDLLEGISRKGHIATTETLLIRGKSRTIRRIQSIHYLDRKDPDVQAHIL	N	Conserved in Enterobacteriaceae	5639.73	5526.98	6012.07	6975.75	9985.03	6650.4	8252.18	9405.63
man-116	STM14_4922	4315766	4316791	-	1191	1026	GTGAAATCGAACAAGCAGGTTACTGCCGCTACGATGAAGGATGTTGCGTTGAAGGCGAAAGTCTCTACGGCAACCGTATCCCGCGCGTTAATGAACCCCGATAAAGTCTCCCAGTCGACCCGTAGCCGGGTTGAACAGGCCGCGCTTGAAGTGGGTTATTTCCCGCAGTCGATGGGGCGAAATGTAAAACGCAATGAATCCCGTACGATTTTGGTGATTGTCCCGGATATTTGCGATCCCTTCTTCAGTGAAATTATCCGCGGTATCGAAGTGACCGCGGCAGAACAGGGGTATCTGGTGCTGATTGGCGATTGCGCCCATCAAAACCAGAAAGAAAAAACCTTTCTTAATCTCATCATCACCAAACAGATCGACGGCATGGTACTTCTCAGTTCCCGA…	341	MKSNKQVTAATMKDVALKAKVSTATVSRALMNPDKVSQSTRSRVEQAALEVGYFPQSMGRNVKRNESRTILVIVPDICDPFFSEIIRGIEVTAAEQGYLVLIGDCAHQNQKEKTFLNLIITKQIDGMVLLSSRLPFDASVEEQRNLPPMVMSNEFAPELELPTEHIDNLTAAFNAMNYLLDLGHKRIGCIAGPEDMPLCHYRLQGYVQALRRSGIVVDPHYIARGDFTFEAGANALKQLLEQPLPPTAVFCHSDVMALGALSWAKRQGLKVPDDLSIIGFDNIALAEFCDPPLTTVAQPRFDIGREAMLLLLDQMQGQNVSSGSRLMDCELIIRGSTRALP	N	Conserved in Enterobacteriaceae	529.85	1952.37	3478.32	2961.28	3391.37	8118.36	5530.4	5678.23
man-117	STM14_4928	4323298	4324458	+	1302	1161	ATGACGCGTAAACAGGCCACTATCGCAGTGCGTAGCGGATTAAACGATGACGAACAATACGGCTGCGTTGTGCCGCCAATCCATCTCTCCAGTACCTATAACTTTACCGGTTTCAATGAGCCGCGCGCGCATGATTATTCCCGCCGCGGTAATCCCACGCGTGATGTTGTTCAGCGCGCATTAGCGGAACTGGAAGGCGGCGCGGGCGCGGTATTGACGAATACCGGCATGTCGGCGATTCATCTGGTCACCACCGTTTTCCTCAAGCCGGGCGATCTGCTGGTCGCGCCGCATGATTGCTATGGCGGCAGTTATCGTCTGTTTGACAGTCTGGCGACACGCGGCTGTTATCGTGTGCGGTTTGTCGATCAGGGCGATGAACGCGCCTTACAGGCGGCG…	386	MTRKQATIAVRSGLNDDEQYGCVVPPIHLSSTYNFTGFNEPRAHDYSRRGNPTRDVVQRALAELEGGAGAVLTNTGMSAIHLVTTVFLKPGDLLVAPHDCYGGSYRLFDSLATRGCYRVRFVDQGDERALQAALEEKPKLVLVESPSNPLLRVVDIAKICRLAREAGAVSVVDNTFLSPALQNPLALGADLVLHSCTKYLNGHSDVVAGVVIAKDPEVVTELAWWANNIGVTGGAFDSYLLLRGLRTLVPRMELAQRNAQAIVKYLQTQPLVKKLYHPSLPENQGHEIAARQQKGFGAMLSFELDGDEETLRRFLGGLSLFTLAESLGGVESLISHAATMTHAGMSPQARASAGISETLLRISTGIEDGEDLIADLENGFRAANKG	N	Conserved in Enterobacteriaceae	180.87	843.36	388.2	321.46	2006.51	3108.85	1404.22	2664.52
man-118	STM14_4992	4387904	4388182	+	324	279	ATGCCAGCGATTATTTCATTAATCTATTTAATGTTTAGTCTTTTAGTATTTACAAAAAAGATAACCATTTCAAACGTTCTGTCCGCTTTTTTATTGTTTCTATCGTTATATATACTTCACCATAAATCATTACTTATATTTATTTATTGTCTTATTATTATTGTCGCCACCGCTATTCTTCATCGAGTCAAAACCAGCGCGGATAAAAAAGCCGTATTTTATTTTTCAATGCCATGCTGGCTCTTGGTTTTATCTGTAATTATAAATATTAATGAATAA	92	MPAIISLIYLMFSLLVFTKKITISNVLSAFLLFLSLYILHHKSLLIFIYCLIIIVATAILHRVKTSADKKAVFYFSMPCWLLVLSVIININE	N	Conserved in Enterobacteriaceae	811.3	1004.25	634.54	799.8	4591.72	4508.5	2981.45	3030.03
man-119	STM14_5014	4402017	4403414	+	1482	1398	GTGAGTTTTATACGATTACATAAAGATGCCGCTGCAACGTGGTTGAGTCGACTGTTACCTGCGGCGATCTTCATTCTGGTGGGGCTATTTTCCATTATGGTCATTCGCGACTATGGCCGTGAGAGCGCTGCCGCCAGGCAGACGCTGCTGGAAAAGGGAAATGTACTCATTCGCGCTCTGGAGTCCGGCACGCGAGTAGGTATGGGAATGCGGATGCATCACGCGCAGCAGCAGACATTGCTGGAAGAGATGGCGGGTCAGCCAGGCGTGTTGTGGTTCGCCGTAACGGATGCGCAGGGGGTAATCATCACTCATAGCAACCCTGGCATGGTGGGCAAATCGCTCTATTCCCCATCTGAAATGCATCAACTAAACCCCGGGCCGCAGGAGCGTTGGCGG…	465	MSFIRLHKDAAATWLSRLLPAAIFILVGLFSIMVIRDYGRESAAARQTLLEKGNVLIRALESGTRVGMGMRMHHAQQQTLLEEMAGQPGVLWFAVTDAQGVIITHSNPGMVGKSLYSPSEMHQLNPGPQERWRRVDVAANGETVPALEIYRQFQPLFGMRGHGMRGHGMARSANDDEPAKQTIFIAFDASELAATQAREWRNTLIVLSALAAVLLATLLAFFWHQRYQRSHRELLDAMKRKEKLVAMGHLAAGVAHEIRNPLSSIKGLAKYFAERTPAGGESHELAQVMAKEADRLNRVVSELLELVKPAHLTLQTVNLNDIITHSLNLVSQDAQSREIQLRFTANETLKRIQADPDRLTQVLLNLYLNAIHAIGRQGTISVEAKESGTDRVIITVTDS…	N	Conserved in Enterobacteriaceae	2593.44	2233.33	6008.7	5956.49	4153.54	3955.43	6587.52	7089.36
man-120	STM14_5035	4421878	4425561	+	3789	3684	GTGAGCAGCAAAGTTGAACAACTGCGTGCGCAGTTAAATGAACGTATTCTGGTGCTGGACGGCGGTATGGGCACTATGATCCAGAGCTATCGTCTACATGAAGAAGATTTCCGCGGGGAGCGCTTTGCCGACTGGCCCTGCGACCTGAAAGGCAACAATGACCTGCTGGTCCTCAGCAAGCCGGAGGTGATCGCCGCTATCCACAACGCCTACTTTGAGGCTGGCGCGGATATCATCGAAACCAACACCTTTAACTCGACAACCATTGCGATGGCGGATTACCGGATGGAATCCCTGTCGGCGGAAATTAACTATGCGGCGGCCAAACTGGCGCGCGCCTGCGCCGATGAATGGACGGCGCGAACACCAGAAAAACCACGCTTTGTTGCGGGCGTGCTT…	1227	MSSKVEQLRAQLNERILVLDGGMGTMIQSYRLHEEDFRGERFADWPCDLKGNNDLLVLSKPEVIAAIHNAYFEAGADIIETNTFNSTTIAMADYRMESLSAEINYAAAKLARACADEWTARTPEKPRFVAGVLGPTNRTASISPDVNDPAFRNITFDQLVAAYRESTKALVEGGADLILIETVFDTLNAKAAVFAVKEEFEALGVDLPIMISGTITDASGRTLSGQTTEAFYNSLRHAEALTFGLNCALGPDELRQYVQELSRIAECYVTAHPNAGLPNAFGEYDLDADTMAKQIREWAEAGFLNIVGGCCGTTPEHIAAMSRAVAGLLPRQLPDIPVACRLSGLEPLNIGDDSLFVNVGERTNVTGSAKFKRLIKEEKYSEALDVARQQVESGAQIID…	N	Conserved in Enterobacteriaceae	137.31	112.05	319.27	227.78	2043.77	2661.77	3005.7	3406.42
man-121	STM14_5042	4430259	4430468	-	174	210	TTGATGAGTCAACCTGTCGAACGCTGGCGATCGAAGTCGGGATGCAGAACTCTGGTCTTGCTGCTGCATTGGGTAAAATCTACTTTGGCCCGCTCGCAGCGCTGCCTGGCGCGCTGTTCTCAGTGTGGCACAACCTTTCAGGGTCACTACTGGCTGGTTACTGGTCCGGGAAACCGATTGTTGAAAAATCGGGCGAAACGGCAAAGGTAA	69	MMSQPVERWRSKSGCRTLVLLLHWVKSTLARSQRCLARCSQCGTTFQGHYWLVTGPGNRLLKNRAKRQR	N	Conserved in Enterobacteriaceae	36	235	96.58	22.39	69.89	72.19	81.52	105.07
man-122	STM14_5046	4432382	4432648	-	291	267	ATGAGATTATTCGCAGTAATGAATTTTTATTATATCGATTACTTATGCAGGCCAATAACAATCGCCGTCGTAATTTTTTTATTTTGGTGGCGTCTGGCAAATGAGATGTATATCTATGGTTCAAAAAAACAGAAAAAAACTGGATTATGGATTAATCGCAAGCTAAATTCCAAATTTGGAATTGATATAGAGCTGGGAGCAGTAAAAAGGGGAAATAAGATCACTCCCATCCCAACTCTTATTTTATATATCCCCATGAAAATATAA	88	MRLFAVMNFYYIDYLCRPITIAVVIFLFWWRLANEMYIYGSKKQKKTGLWINRKLNSKFGIDIELGAVKRGNKITPIPTLILYIPMKI	N	Conserved in Enterobacteriaceae	1322.39	1257.88	2838.25	2199.9	762.85	606.13	1437.34	838.06
man-123	STM14_5064	4446612	4446929	-	312	318	ATGAACGAAAAATATACCCTGCAGTTCCCGTTTACCTCCGCCGCCGGGGAACGTATCGACGTTCTGCAATTACGTCGCCTGAAGGTAAAAGATATGCGCGCCGCGCGACGCGCCAGCGATAAACCGGAAGAGTGGGATGAGCCGCTGATGGCGGCTATGACCGGGCTGGTAACCGAAGATCTGGCGGAAATGGATCTGCTGGACTATCAGGCATTGCAGAAACGATTTCAGTCCATGCTTAGCATGGCTACAGAACCCACAGCAACTGTGGCAGGCAATGGCGCTGCTGGCGAGGTGGTTTCGCTTTCCGCCCAGTGA	105	MNEKYTLQFPFTSAAGERIDVLQLRRLKVKDMRAARRASDKPEEWDEPLMAAMTGLVTEDLAEMDLLDYQALQKRFQSMLSMATEPTATVAGNGAAGEVVSLSAQ	N	Conserved in Enterobacteriaceae	7715.21	98.66	2367.91	3027.21	14259.5	787.97	2669.34	3308.12
man-124	STM14_5140	4526696	4527013	-	390	318	GTGATGAATGACCAAATTTATCAGCGGATAGAAGACAGTGCGCGTTTCAGGGAATTAGTTGAAAAACGGCAACGGTTTGCCACGATTCTGTCGGTTATCATGCTGGCGGTTTATATCAGCTTTATTTTACTGATCGCCTTCGCGCCTGGCTGGCTGGGCACGCCTCTACATGCGGGAACCAGCGTCACCCGAGGAATTCCCATTGGCGTCGGGGTGATTGTGATTTCTTTTGTGTTGACCGGAATTTATATCTGGCGGGCGAACGGCGAATTCGATCGTCTTAATAACGCCGTACTGCATGAGGTGAAAGTATTATGA	105	MMNDQIYQRIEDSARFRELVEKRQRFATILSVIMLAVYISFILLIAFAPGWLGTPLHAGTSVTRGIPIGVGVIVISFVLTGIYIWRANGEFDRLNNAVLHEVKVL	N	Conserved in Enterobacteriaceae	220.96	252.43	10196.5	632.28	1758.81	443.1	19688.9	1902.43
man-125	STM14_5157	4542560	4542994	-	543	435	ATGCCAGTCTGTGAATTACGCCACGCGACAACAGAGGATACCGATTCTGTTTACGCGCTTATCTGTGAGTTACTTAAAAATGAGCTTGATTATCAGGCTTTCAGGGATGGATTCGCCGCTAATTTACTGGACCCCAACGTTCATTATCGTTTAGCGCTGCGCAACGGAGAGGTGGTCGGCATGATCAGCCTGCATATGCAGTTTCATCTCCATCATGCCAACTGGATTGGCGAAATTCAGGAGCTGGTGGTATTACCGCCGATGCGGGGACAAAAAATTGGCAGTCAGCTTCTGGCCTGGGCAGAAGAAGAAGCACGTCAGGCGGGCGCCGAGCTAACGGAGCTTTCCACAAATATTAAACGCCGCGATGCACACCGTTTTTATCTTCGCGAAGGTTAC…	144	MPVCELRHATTEDTDSVYALICELLKNELDYQAFRDGFAANLLDPNVHYRLALRNGEVVGMISLHMQFHLHHANWIGEIQELVVLPPMRGQKIGSQLLAWAEEEARQAGAELTELSTNIKRRDAHRFYLREGYKQSHFRFTKAL	N	Conserved in Enterobacteriaceae	1868.98	30763	31804.7	50823.3	12233	26128.2	75574.3	55170.6
man-126	STM14_5162	4546084	4546173	+	105	90	ATGAAAAGCTATATTTATAAAAGTTTGACGACCCTGTGTAGTGTGCTGATTGTCAGCAGTTTTATCTATGTGTGGGTCACGACGTATTAA	29	MKSYIYKSLTTLCSVLIVSSFIYVWVTTY	N	Conserved in Enterobacteriaceae	854.73	217.17	346.03	1502.76	1569.95	451.59	1274.86	2688.77
man-127	STM14_5170	4554739	4555677	-	1077	939	GTGACGATGAGTACGCAAGCAATATCCCTCCTCCCGCCCGACCCGCACATGTGCAACGGCGATGAAAAGCAAACCCGTAGCCCGCTGTCGCTCTATTCCGAATATCAACGACTGGACGTTGAACTGAGGCCGCCGCACAGAATGGCCAGCAGTCACTGGCATGGGCAAGTAGAAGTGAATGTTCCGTTTGACGGCGATGTGGAGTATTTAATCAACAATGAAGTCGTGCAGATAAAGCAGGGGCATATCACCCTGTTTTGGGCCTGTACGCCACACCAGCTTACCCGCCCCGGCAACTGCCGCCAGATGGCGATTTTCAGTTTGCCGATGCACCTGTTTCTCTCCTGGCCGCTGGATCGCGATCTTATCAACCACGTCACGCACGGGATGGTGGTTAAA…	312	MTMSTQAISLLPPDPHMCNGDEKQTRSPLSLYSEYQRLDVELRPPHRMASSHWHGQVEVNVPFDGDVEYLINNEVVQIKQGHITLFWACTPHQLTRPGNCRQMAIFSLPMHLFLSWPLDRDLINHVTHGMVVKSLATQQLSTFEVLRWQQETSSPNEQIRQLAIDEIGLMLKRFSLSGWQPILLNKTSRTHKNSVSRHAQFYVSQMLGFIADNYDQALTINDVAEHVKLNANYAMGIFQRVMQLTMKQYITAMRINHVRALLSDTDKTILDVALTAGFRSSSRFYSTFSKFVGMSPQQYRKLSQQRRQTMPG	N	Conserved in Enterobacteriaceae	3054.33	57.46	56.68	416.14	7245.49	70.6	39.86	719.3
man-128	STM14_5187	4573428	4573700	-	288	273	ATGCAGTATAAGAACAAAGCAAAACATATTAATATAAGAGATGGGATTCTGTTGCTCGCTAAAAAATTCGACCTAACATTGAGCGAAAAAAAAGTTATTTATTACGTGGCAGCAGGATTATCTGTTAAAAGTTGCTCAAATTTATTAGATCGAAATATAAAAACGATTTCAACACAAAAGAGATCAGCCTATAAAAAAATGGATATTACTACTGATGTTGAATTAATCCATTTGATGCTGAATGAGTTTTACATATCAGTCGATATTACGTAA	90	MQYKNKAKHINIRDGILLLAKKFDLTLSEKKVIYYVAAGLSVKSCSNLLDRNIKTISTQKRSAYKKMDITTDVELIHLMLNEFYISVDIT	N	Conserved in Enterobacteriaceae	208111	572131	342343	296764	217516	388776	220282	193173
man-129	STM14_5206	4587605	4587898	+	474	294	ATGAGTATTCGTCCGTTACATGATCGTGTGATCGTCAAACGTAAAGAAGTTGAGTCTAAATCTGCTGGCGGCATCGTACTGACCGGTTCCGCAGCGGGTAAATCAACTCGTGGCGAAATCATCGCTGTCGGTAAGGGTCGCATCCTGGACAACGGTACTGTACAGCCGCTGGACGTGAAAGTTGGCGACATCGTTATTTTTAACGATGGCTACGGTGTGAAATCTGAAAAGATCGACAATGAAGAAGTGTTGATCATGTCTGAAAGCGACATTCTGGCAATTGTTGAAGCGTAA	97	MSIRPLHDRVIVKRKEVESKSAGGIVLTGSAAGKSTRGEIIAVGKGRILDNGTVQPLDVKVGDIVIFNDGYGVKSEKIDNEEVLIMSESDILAIVEA	N	Conserved in Enterobacteriaceae	40477.2	25590.3	71083.3	60180.6	29414.1	19057.1	41870.7	40335.9
man-130	STM14_5209	4589832	4590185	+	372	354	ATGCACGTGAAATATTTAGCAGGGATCGTTGGCGCCGCGCTGCTGATGGCGGGTTGTAGCTCCAGCAACGAACTCACCGCTGCCGGCCAAAATGTACGCTTTGTCGAAGATAAGCCGGGCGCGGAATGCCAGCTTATTGGTACGGCAACTGGTAAACAGAGTAACTGGTTTTCAGGCCAGCACGGCGAAGAGGGTGGCTCAATGCGTGGCGCAGCGAACGATCTGCGTAATCAGGCAGCCGCGATGGGTGGAAACGTGCTGTATGGCGTAAGTAGTCCGTCACAGGGCATGTTGTCCAGTTTTGTCCCGACGGCCAGCGAGATGAACGGCCAGGTTTATAAATGTCCGAACTGA	117	MHVKYLAGIVGAALLMAGCSSSNELTAAGQNVRFVEDKPGAECQLIGTATGKQSNWFSGQHGEEGGSMRGAANDLRNQAAAMGGNVLYGVSSPSQGMLSSFVPTASEMNGQVYKCPN	Y	Conserved in Enterobacteriaceae	618.95	1901.4	820.51	1313.62	7068.39	14456.2	5358.9	6269.39
man-131	STM14_5215	4593071	4593202	+	177	132	ATGAAACGCTTTATCGGTCTTGTCGCGCTGGTTCTTCTTACCAGCACATTATTAACGGCATGTAATACCGCCCGCGGCTTCGGCGAAGATATTCAGCATCTCGGCCACGCCATCTCCCGTGCAGCCAGCTAA	43	MKRFIGLVALVLLTSTLLTACNTARGFGEDIQHLGHAISRAAS	Y	Conserved in Enterobacteriaceae	3874.36	454.68	672.72	4896.02	7572.4	1466.57	2444.66	6606.65
man-132	STM14_5260	4634111	4634386	-	321	276	ATGAAACAAGAACTTGCCTTATCCTCACTGCTGCTTTCTGCCGGACTGGTGAGTACGACGGCACAGTCTGCCGAATTCGCCAGTGCTGACTGCGTAACGGGTCTGAATGAAATCGGCCTGATCTCGGTCAGTAATGTTGCAGGAAACCCACAGGATGTAGAGCGGATTATCGCCCTGAAAGCCGATGAACAGGGTGCGTCCTGGTACAGAATTATTCAAATGTATGAAGAACAACAGTCGGATAACTGGCGCGTACAGGCGATACTCTATGCCTGA	91	MKQELALSSLLLSAGLVSTTAQSAEFASADCVTGLNEIGLISVSNVAGNPQDVERIIALKADEQGASWYRIIQMYEEQQSDNWRVQAILYA	Y	Conserved in Enterobacteriaceae	3235.69	2277.91	2348.97	4222.94	13795.3	2099.24	4238.15	15831.8
man-133	STM14_5261	4634517	4634819	-	330	303	ATGCGTCGGTTTGCTTCATTGATAGCAGCGCTGTTATTAAGCGCGTGTAGCGTGCTGCAGGGTACGCCGCAACCTGCGCCGCCTGTCGCCGATCACCCGCAGGAAATCCGTCGCGATCAAACGCAAGGACTACAGCGGATGGGGACCGTAAGCGCGCTGGTTCGGGGCTCCCCGGATGATGCAATAGATGAAATCAGAGCGAAAGCCGTCGCTGCGAAAGCCGATTATTACGTTATCTTAATGGTTGATGAAACGGTTGTAACCGGCCAGTGGTATTCACAAGCCATTTTGTATCGTCAATAA	100	MRRFASLIAALLLSACSVLQGTPQPAPPVADHPQEIRRDQTQGLQRMGTVSALVRGSPDDAIDEIRAKAVAAKADYYVILMVDETVVTGQWYSQAILYRQ	Y	Conserved in Enterobacteriaceae	33730.6	69288.4	57289.1	69642	17067.9	26134.4	24201.3	35483.9
man-134	STM14_5281	4646762	4647382	+	732	621	ATGGCCACCCCGACTTTTGACACTATTGAAGCGCAAGCGAGCTACGGCATTGGTTTGCAGGTAGGGCAGCAGCTCAGCGAATCCGGTCTTGAAGGGCTGTTGCCTGAAGCGCTGGTTGCAGGCATTGCTGATGCGCTGGAAGGTAAACACCCGGCGGTTCCTGTTGATGTGGTGCATCGTGCGCTGCGTGAAATTCATGAGCGTGCGGACGCGGTGCGTCGTGAGCGTTTCAAAGCGATGGCGGCCGAAGGCGTGAAATACCTGGAAGAAAACCGCGAAAAAGACGGTGTGAACAGTACTGAGTCTGGTTTACAGTTCCGCGTTCTGACGCAGGGCGAAGGCGCGATTCCGGCGCGTACCGACCGCGTACGCGTGCATTACACCGGTAAGCTTATTGAT…	206	MATPTFDTIEAQASYGIGLQVGQQLSESGLEGLLPEALVAGIADALEGKHPAVPVDVVHRALREIHERADAVRRERFKAMAAEGVKYLEENREKDGVNSTESGLQFRVLTQGEGAIPARTDRVRVHYTGKLIDGTVFDSSVARGEPAEFPVNGVIAGWIEALTLMPVGSKWELTIPQELAYGERGAGASIPPFSTLVFEVELLEIL	N	Conserved in Enterobacteriaceae	1032.15	1473.9	1903.78	2260.6	1586.36	1940.42	2458.95	3106.52
man-135	STM14_5414	4776474	4776920	+	531	447	ATGGACGCCATCTATTTAAAACTGGACGGTATTGAAGGCGAAAGCCGGATCAAAGGTTTTGAAAACCAAATAAAACTTATTGCTTACAACCACAACCCGACAAAACGGGAGTCCGGCGAAGCGAGAGGGACATATATTGGAGGGTTGACGCTGACAAAGCCAGTCGATCTTGCTACACCAGGCCTCTATGAGCACTATTGTAACGGGAAAACGGTGAAAGAAGGCGTGCTGACATTATGCCGTCGTGATAAGGGCGCAATGCTGCCATTTATTATTTATACGCTCACCAATGTGCGAATTTCACGCATGAGCAATCATGGAGACGCCGAAGGCAGCGCCACGGAGACCGTGGATTTGGTTTATAGCCATATTCGCTGGGATATTCCCGCATTAGCGTCG…	148	MDAIYLKLDGIEGESRIKGFENQIKLIAYNHNPTKRESGEARGTYIGGLTLTKPVDLATPGLYEHYCNGKTVKEGVLTLCRRDKGAMLPFIIYTLTNVRISRMSNHGDAEGSATETVDLVYSHIRWDIPALASKSKTRRPLHRQALWR	N	Conserved in Enterobacteriaceae	1721.05	1943.15	2787.84	969.6	2437.64	2344.24	4657.01	2969.56
man-136	STM14_5428	4786889	4787110	+	516	222	ATGACGCTGATAGAGAGGATCCGCGCAGCGGATCGCAGAAAAGGGGAACGGCAAGGAAGACAGGTTGGTCTGGAGGAAGGGCTGGAAAAAGGGCTGGAAAAAGGTCAGCGCGTTGCCGCATTGCGTATCGCCAAACAGATGCTGGCGGACGGACTTGACCGCGAGACTGTCCAGCGGTTCACCGGCCTTACGGCTGAAGAGCTTCAGGATGTTAGCCACTAA	73	MTLIERIRAADRRKGERQGRQVGLEEGLEKGLEKGQRVAALRIAKQMLADGLDRETVQRFTGLTAEELQDVSH	N	Conserved in Enterobacteriaceae	485.54	585.47	2230.27	1254.33	1320.89	1041.89	2675.15	1877.41
man-137	STM14_5461	4817461	4818237	-	912	777	ATGCAAGAAGAGCAATCAATTCAACGAGCAGTAACACGGTTATGTATTCAATGCGGGCTGTTTTTATTGCAGCACGGGGCGGAAAGCGCACTGGTTGATGAGCTTTCCACCCGACTCGGTTTGGCGCTCGGTATGGATAGCGTCGAAAGCGCGATCTCCTCTAACGCCATTGTCCTGACGACCATTAAAGACGGACAATGTCTGACATCGACACGTAAAAACCAGGATCGCGGCATTAATATGCACGTCGTCACGGAGGTTCAGCATATCGTTATCCTCGCGGAACATCGTCTGCTGGATTACAAAGGCGTGGAAAAACGCTTTAGCCAGCTCCGCCCGCTGCGTTATCCGCGCTGGCTGGTGGCGTTTATGGTCGGTCTTTCCTGCTCCTGCTTTTGT…	258	MQEEQSIQRAVTRLCIQCGLFLLQHGAESALVDELSTRLGLALGMDSVESAISSNAIVLTTIKDGQCLTSTRKNQDRGINMHVVTEVQHIVILAEHRLLDYKGVEKRFSQLRPLRYPRWLVAFMVGLSCSCFCKLNNGGWDGAVITFFASMIAMYIRQMLAQRHLHPQINFCITAFVATTISGLMLTLPAFSQTPTIAMAASVLLLVPGFPLINSVADMFKGHINTGLARWAIASLLTLATCVGVVMSMTVWGLRGWV	N	Conserved in Enterobacteriaceae	92292	6293.97	86722.6	16424.4	98947	5830.06	63012.2	21559.1
man-138	STM14_5481	4829458	4829619	+	180	162	ATGTTTCGTTGGGGCATTATATTTCTGGTTATCGCGTTAATTGCCGCCGCATTGGGTTTTGGTGGACTGGCTGGTACGGCTGCCGGCGCGGCGAAAATCGTCTTCGTCGTCGGGATCGTGCTCTTCCTGGTCAGCCTGTTCATGGGCCGTAAACGACCCTAG	53	MFRWGIIFLVIALIAAALGFGGLAGTAAGAAKIVFVVGIVLFLVSLFMGRKRP	N	Conserved in Enterobacteriaceae	4633.4	1292.39	5165.31	2060.86	7179.3	2199.93	4828.53	3116.98
man-139	STM14_5488	4835167	4836489	+	1431	1323	GTGTTTCTCGCACAAGAAATTATTCGTAAAAAGCGTGATGGTCATGCGTTGAGTGACGAAGAAATTCGTTTCTTTATTAATGGTATTCGTGACAATACTATCTCTGAAGGGCAGATTGCCGCCCTGGCGATGACCATCTTCTTCCACGATATGACCATGCCGGAGCGTGTTTCGCTGACCATGGCGATGCGGGATTCCGGTACTGTCCTTGACTGGAAAAGCCTGAATCTCAATGGCCCGATTGTCGATAAGCATTCGACCGGCGGCGTAGGGGACGTGACGTCTCTGATGTTGGGGCCAATGGTAGCGGCCTGCGGCGGTTATGTGCCGATGATCTCCGGTCGCGGCCTCGGACATACCGGCGGTACGCTCGACAAACTGGAAGCGATCCCGGGCTTC…	440	MFLAQEIIRKKRDGHALSDEEIRFFINGIRDNTISEGQIAALAMTIFFHDMTMPERVSLTMAMRDSGTVLDWKSLNLNGPIVDKHSTGGVGDVTSLMLGPMVAACGGYVPMISGRGLGHTGGTLDKLEAIPGFDIFPDDNRFREIIQDVGVAIIGQTSSLAPADKRFYATRDITATVDSIPLITGSILAKKLAEGLDALVMDVKVGSGAFMPTYELSEALAEAIVGVANGAGVRTTALLTDMNQVLASSAGNAVEVREAVQFLTGEYRNPRLFDVTMALCVEMLISGQLAKDDAEARAKLQAVLDNGKAAEVFGRMVAAQKGPSDFVENYDKYLPTAMLSKAVYADTEGFISAMDTRALGMAVVSMGGGRRQASDTIDYSVGFTDMARLGDSIDGQRPL…	N	Conserved in Enterobacteriaceae	123.59	19.65	83.9	25.53	136.95	40.35	83.17	43.48
