# Supplementary material for: Identification of Unannotated Small Genes in Salmonella
Source: G3 (Bethesda). 2017 Jan 25;7(3):983–9. doi: 10.1534/g3.116.036939 (PMC5345727; doi:10.1534/g3.116.036939)
Supplement: Supplementary file 8 [file 983TableS10.xlsx]

## Sheet: Table S10
Table S10 List of unannotated ORFs identified in strain 14028s
mia-# (missing in annotation)	Putative RBS, spacing to start codon (nucleotides)	Coordinate (left)	Coordinate (right)	Orientationa	Flanking genesb	Length (nt)	nt sequencec	Length (aa)	aa sequence	SignalP4.1	Ribosome density (RPKM) in LB	Ribosome density (RPKM) in RDM	Ribosome density (RPKM) in low Mg2+ (10 µM)	Ribosome density (RPKM) in low pH (5.8)	mRNA density (RPKM) in LB	mRNA density (RPKM) in RDM	mRNA density (RPKM) in low Mg2+ (10 µM)	mRNA density (RPKM) in low pH (5.8)
mia-1	gga, 4	224209	224256	> < <	mrcB / STM14_0227	48	TTATGTGCGACGTAGGCCGAATAAGACGCTTACGTCGCCATCCGGCAA	15	MPDGDVSVLFGLRRT	N	30371.8	24793.2	25231	14618.1	98255	80894.2	42942.8	57762.7
mia-2	gga, 12	337324	337587	> > >	STM14_0340 / 0341	264	ATGCTAAATAAATTTAAATTGTGGGTGAGCAAACATACTGATTATACGGTAATTCATAATGAAAATGATTTATCTTACAGTATTATTATAGATTTTGAAGATGACCGGTATATATCAAGATTTACTGTATGGGATGACCTAAGCTGTATGTCAGAAGTAATGGATGTGGATACTGGTTTATATAAATTAAACAAGAGAAACGAATTTTCTACATTTGATGAACTTCTGGATATATTTGATGATTTTATGATAAGTATTAAATAA	87	MLNKFKLWVSKHTDYTVIHNENDLSYSIIIDFEDDRYISRFTVWDDLSCMSEVMDVDTGLYKLNKRNEFSTFDELLDIFDDFMISIK	N	112967	88869	120803	38121	4510.65	5603.06	3118.69	2661.54
mia-3	aggagg, 6	359645	359692	> > >	dinP / STM14_0370	48	ATGACACTTTATTCTCTGAACGCACTTTGCAGACCTTTCCAGGATTAA	15	MTLYSLNALCRPFQD	N	5206.6	1770.94	2803.44	3758.95	1958.57	3081.68	1338.16	1186.9
mia-4	gga, 8	438238	438270	< > >	STM14_0453 /psiF	33	TTGCACATTAGCCTACGGTTTGTCAATCAATAA	10	MHISLRFVNQ	N	1262.21	0	5436.98	0	949.61	27	3361.99	191.82
mia-5	gga, 14	442306	442398	> > >	yaiA / aroM	93	ATGAACCACTCGGAAGGGATTCTGAGTACCCCTAAATTGTATCTCCATCACATTCTTGAAACATTTATACTGGCAACTAAAACCGTAAATTAA	30	MNHSEGILSTPKLYLHHILETFILATKTVN	N	9405.47	6398.23	5305.44	1077.83	9097.88	4771.64	7220.57	7963.74
mia-6	gga, 7	504543	504656	> > >	clpP / STM14_0531	114	GTGCCGCTATACACTTCATCCTTCACGCTACCTCGGTGTTGGCTGCCAGCGCGCCTCCCAGTGACTTACTTATGTAAGCGCCTGCAGAGTCGACGAGTTGCCGCCTTGATGTAG	37	MPLYTSSFTLPRCWLPARLPVTYLCKRLQSRRVAALM	N	43845	26098.1	30296.9	10727.3	67072.5	86287.1	42565	45421.6
mia-7	gga, 12	540761	540868	> > >	ybaN / apt	108	ATGAAAAGCAACAAAAGCGCTGAAGCACACGAATCGCTGTTGCAATTGTCGTTCACAGCCAGTAAATTCGACCGTTTTCGAGCACAGGCGCAGGCGGTCAAAGAGTAA	35	MKSNKSAEAHESLLQLSFTASKFDRFRAQAQAVKE	N	1928.37	1574.17	830.65	2227.52	6818.73	13011.5	5352.64	4337.33
mia-8	agga, 7	766454	766558	<	Opposite strand of STM14_0820	105	CTACCGGGCATTAAAGAAATGAAAGTCGAAACTATTGCGGTGGGCAAACATCATAATATGCGTTGTCCGCCTTATATGGGGCATAAAACGATTATTATTTTCCAT	34	MENNNRFMPHIRRTTHIMMFAHRNSFDFHFFNAR	N	330049	12953.2	16233.3	26348.4	4625.96	352.19	778.57	3014.36
mia-9	agga, 9	797938	798000	<	Opposite strand of STM14_0850	63	TTAATTTCGAATTAGCAGCAAATCAGGAACGTAGCAATCCGAGTAATGTAACCTGTCTATCAC	20	MIDRLHYSDCYVPDLLLIRN	N	176528	55320.8	42719.2	28321.4	130323	18783.6	21688.6	58880.5
mia-10	agg, 8	801817	801912	> > >	sdhB / kgd	96	GTGCAGGAAACCTCTAAAAACTGCCATATGATTAGTAATAATCGAGATGTTCAGAGCGAGACAAGGCGCGGTCTGAACGAATCTTCGGGAGCATAG	31	MQETSKNCHMISNNRDVQSETRRGLNESSGA	N	26033	2656.41	7008.61	6056.08	36396.8	6355.97	6143.37	12462.5
mia-11	gga, 6	813444	813527	> > >	ygbE / ybgC	84	GTGAATACAAGGCGATATACAACGGCATTCTTGAGGCATTACGGCGGCAAGCGGATGACGCCAACAAAGAGGCTGCAGGGATGA	27	MNTRRYTTAFLRHYGGKRMTPTKRLQG	N	93222.9	196321	119080	28162.3	6342.04	11886.5	8272.26	7309.82
mia-12	gagg, 9	891425	891454	> > <	ybiB / ybiJ	30	GTGGGTCTGTTGGCAAACAGACGAGGGTAA	9	MGLLANRRG	N	1388.43	2833.5	2990.34	2004.77	522.29	1232.67	1751.77	1477.04
mia-13	agga, 9	900390	900452	>	Opposite strand of STM14_970	63	ATGAATGTATCGCGCCGCACGCGCATTATTGGTGCAATAAGCCGGAAAAGTGATGTTAATTGA	20	MNVSRRTRIIGAISRKSDVN	N	81983.2	47225.1	154501	11137.6	11689.3	7043.85	34942.8	7234.46
mia-14	gga, 13	900486	900533	< > >	STM14_970 / ompX	48	ATGAAAGGCGCCCTTAGACACCGTGAATCGCAAAGAGTTTCCCATTAA	15	MKGALRHRESQRVSH	N	33842.9	10625.6	132696	8770.87	7181.43	2696.47	37833.4	5802.64
mia-15	gag, 12	976763	976846	< > >	ybjX / ybjY	84	GTGTACCAGGTATTATCTGTAAGCTGTGTCATGATCGTAATCCGCGACATAAGATTGTCGAGATTGAACCACAGGAAACATTAA	27	MYQVLSVSCVMIVIRDIRLSRLNHRKH	N	349090	642598	731032	129355	17160.8	36980.2	44489.5	16126.8
mia-16	gga, 10	980503	980580	< > >	cspD / clpS	78	ATGAATCAAAAATTTGAAGCAGTTAACGCTATTGCCGGGAATGTGACAGATGTCGCGGATGGTACTGATAGATGTTAG	25	MNQKFEAVNAIAGNVTDVADGTDRC	N	17622.3	17436.9	28753.3	5654.48	5222.86	5452.21	3518.52	3408.55
mia-17	gagg, 10	980608	980673	< > >	cspD / clpS	66	GTGTGCATAGACTCTGGTCAGCGGCAGATTTTCCTGCCGACAACTGTAACCGATAATGACGACTGA	21	MCIDSGQRQIFLPTTVTDNDD	N	5048.82	7727.74	18349.8	2430.03	6884.68	11206.1	6458.56	6521.98
mia-18	gga, 12	994905	994970	>	Opposite strand of STM14_1082	66	GTGATGTCGATAGCTGCCGCGAGGCAACGGTCTTCTCACCATAGACCAGGCATTGCGCGCCGTTAA	21	MMSIAAARQRSSHHRPGIARR	N	1262.21	0	6796.23	303.75	24689.9	22132.1	25214.9	22635.1
mia-19	gag, 11	1067429	1067482	> > >	STM14_1155 / STM14_1156	54	ATGGCGATATATGGAAATGTCGGAGCAGAACACCAAGAAGTAAGCGTAATTTGA	17	MAIYGNVGAEHQEVSVI	N	72506.7	132230	52331	10395.1	5803.18	9245.05	5622.98	3399.53
mia-20	gag, 12	1138794	1138979	< > <	STM14_1239 / pipD	186	TTGAAAAGAACAACGTGCTTATATACCTCCTGGGTTTTTGCCGCTTTTGTCTCTCTGCTGATATTTGCCTGGAGTGTCATAAACTATCCTCTCTATGAATCCATAATAATTATTGTCTTTTATATCTGGCTAATTCTGGTACCGCTTTATCTTATTGTGTATGAGTGGCTAATAGATTGTCATTAA	61	MKRTTCLYTSWVFAAFVSLLIFAWSVINYPLYESIIIIVFYIWLILVPLYLIVYEWLIDCH	N	34710.7	7769.28	19051.4	16922	3875.02	497.05	690.66	4186.07
mia-21	gga, 9	1155815	1155898	< > <	STM14_1260 / STM14_1261	84	GTGTTAAAAGCAATGCGTTTCTTTGTCTGCCGGCCATCAGTAATATCCTCTGTACCGGCTCCTCGTTGCCAAAGTGAAGGTTAG	27	MLKAMRFFVCRPSVISSVPAPRCQSEG	N	11900.8	21251.3	11213.8	6443.91	1865.31	1320.72	486.6	904.31
mia-22	agga, 12	1232169	1232219	> > >	STM14_1360 / STM14_1361	51	GTGAAGCAATGTTCGGGGGAGGGCGTAAACTCATCGCGAGATGGAATTTAA	16	MKQCSGEGVNSSRDGI	N	33485.6	21668	20228.8	3144.74	1843.36	4350.61	1030.46	992.97
mia-23	gag, 7	1244316	1244384	>	Opposite strand of STM14_1376	69	ATGGAAACATTCGGAAACTCATTTTGGCAGAATGTGATACTTTTTAGGCTATCTGGCGCTGAAACGTGA	22	METFGNSFWQNVILFRLSGAET	N	45274.8	67757.7	22102.5	3777.11	3179.13	16078.4	2115.67	1926.57
mia-24	gag, 5	1267707	1267778	< < <	potC / STM14_1399	72	TTGGAGAGATTTTGGAGAAGAGAAAAAATTGATCATTTTCAATACTCTAAAAGCACCCCATCCTCTGAATAA	23	MERFWRREKIDHFQYSKSTPSSE	N	94875.8	162926	87841.3	16984.9	1305.71	7704.21	1784.21	2373.81
mia-25	gagg, 8	1330734	1330775	< > >	pagJ / STM14_1481	42	ATGTTTTCTCTTATTAAATGTATTAGTCGCGACTTGATCTGA	13	MFSLIKCISRDLI	N	4958.66	2023.93	40583.2	2863.96	373.06	440.24	8480.81	301.44
mia-26	agg, 5	1335693	1335749	> < >	STM14_1485 / STM14_1486	57	TCAAAACTCCCTCAATTCAGACCGCAATAGTAGTTCATCCTTTACCCCGATCGTCAT	18	MTIGVKDELLLRSELREF	N	6576.76	7456.59	7869.32	351.71	2473.99	324.39	1843.97	1665.83
mia-27	No RBS	1341928	1342020	> > <	STM14_1499 / STM14_1500	93	GTGATTTGTTGTTCTATAGTGGCTAAACACTTTATGGTTTCTGTTAAATATATATGCGTGAGAAAAATTAGCATTCAAATCTATAAAAGTTAG	30	MICCSIVAKHFMVSVKYICVRKISIQIYKS	N	895.76	0	38585.1	431.13	505.44	198.82	14001.6	272.26
mia-28	aggag, 8	1342114	1342188	>	On the opposite strand of STM14_1500	75	GTGAATTATTCGTGGTTTTGTCGATTCGGCATAGTGGCGATAACTGAATGCCGGATCGGTACTGCAGGTGTTTAA	24	VNYSWFCRFGIVAITECRIGTAGV	N	7219.82	1133.4	310397	4811.45	1462.4	1972.28	105106	3629.29
mia-29	agg, 12	1343648	1343692	>	On the same strand of STM14_1504 (pseudogene)	45	ATGCAGGTTAACTTGAAAGATACGATCAATAGCAGAAACCAGTGA	14	MQVNLKDTINSRNQ	N	16661.1	3778	10964.6	2227.52	3830.1	2054.46	1686.89	1406.7
mia-30	gagg, 4	1344999	1345172	> < >	STM14_1507 / STM14_1508	174	CTAACGGCCCTCTGAAGTCACAAGATGAATAAGCCAGTTTTTTGTTTCAGCGGTGACTGAAACATATTTTGTTCCTGGTGGTCTTACCGCCAGTTGCTGAAAAAGACAACGATAATGTAACTGTTGCAGAGACTGACGAATACGACGACCGTGAATTTTATTTTTGGCGACCAT	57	MVAKNKIHGRRIRQSLQQLHYRCLFQQLAVRPPGTKYVSVTAETKNWLIHLVTSEGR	N	8139.05	1954.14	29903.4	5184.75	1080.59	1168.91	2114.21	982.27
mia-31	aggag, 6	1370010	1370051	< > >	yeaJ / STM14_1554	42	GTGGTAAGGATAATAATGTACTTCCGTTCGGAGGCACTATGA	13	VVRIIMYFRSEAL	N	9917.33	10119.6	186896	4773.27	746.12	880.48	30725.5	1205.74
mia-32	agg, 5	1380887	1380904	> < >	yeaC / STM14_1569	18	ATGACAATAATCAGTTAG	5	MTIIS	N	3075	1595	3521	127	1514	1027.23	1304	1157
mia-33	gga, 5	1421277	1421408	< < >	rfc / STM14_1627	132	GTGATGAGTAATGATTATAGACTACCAGATTCAGAATATCTTGCCAGAAGATTTTCCGTACCACACCTTATTTGCCTGATGGTAATATTTTTAATACTAAGCATTTTTTCTAAAGGCTCTATATGCTTATAA	43	VMSNDYRLPDSEYLARRFSVPHLICLMVIFLILSIFSKGSICL	N	40706.1	27691.1	20388.7	8808.84	2730.13	3361.84	2698.44	2158.01
mia-34	agg, 10	1425473	1425517	>	On the opposite strand of STM14_1623	45	ATGAACGCTGCTATTTTCCGTTTCTTTTTTTACTTTAGCACCTGA	14	MNAAIFRFFFYFST	N	18512.3	17001	14951.7	13810.6	8008.38	7396.04	4671.4	3938.76
mia-35	aggagg, 7	1425535	1425597	< > >	STM14_1623 / pheS	63	GTGAAAAACGAAACGAAAAACAGCGCAAAAAAGCCTCCTGATGGAGGCTTTTTTTGTATCTGA	20	VKNETKNSAKKPPDGGFFCI	N	5289.24	4047.86	6407.87	4455.05	7461.23	14087.7	4727.01	8038.29
mia-36	No RBS	1471322	1471516	< < <	pykF / STM14_1673	195	TTGGACTGTAAAACTCAACGACTAAAATTATCCCCTTCCCGTTGGGCTGAAACGCGAGCACACATTCCTCTGCACGCTCTTTCGATGTCACCTATCCTTAGAGCGAGGCATCATCACTTTAGCAACACAGGCTTAGCTTCCGGGCCGTGCGCGCCCGAAGCCAGATTTCCATATCCTCCTCAACTTAAAGACTAA	64	LDCKTQRLKLSPSRWAETRAHIPLHALSMSPILRARHHHFSNTGLASGPCAPEARFPYPPQLKD	N	8971.37	29642.8	17021.9	6065.72	7633.41	10051	9133.18	5940.61
mia-37	gagg, 8	1536352	1536399	< > <	gst / tppB	48	ATGGTAGTGCGGGGACGAGCAAAAAAAAAGCCGCTAACGCACAGTTAG	15	MVVRGRAKKKPLTHS	N	32975.1	21251.3	133631	8353.21	4896.43	5392.95	31021	3824.47
mia-38	agg, 10	1572520	1572612	>	On the opposite strand of STM14_1796	93	ATGAATCCGATAATCTGGGTGGTATTTACGCTTCTGGCGCTGGATGCAATCAGAGAAGTTATGGGCGTATCAAGCTTGACAGGTCTGTGGTGA	30	MNPIIWVVFTLLALDAIREVMGVSSLTGLW	N	8061.83	3656.13	0	646.7	1179.36	795.27	1130.18	1225.19
mia-39	aggag, 7	1604048	1604143	< < <	STM14_1833 / ydeE	96	ATGTTAGGCAGTATTAACCTTTTTATCGTTGTATTAGGAATTATTTTATTTTCCGGATTTCTGGCCGCCTGGTTCAGTCACAAATGGGATGATTAA	31	MLGSINLFIVVLGIILFSGFLAAWFSHKWDD	N	36012.3	15053	121015	16706.4	1795.36	2311.26	12895	4154.16
mia-40	gag, 8	1700842	1700916	< > <	pdgL / ugtL	75	TTGCTTATACGACCACTGCGCCTCCTGTTCTATACCCAAAATAATTCGAGTTGCGTAAAGGCGGCAAGGGAGTGA	24	LLIRPLRLLFYTQNNSSCVKAARE	N	43318.9	49869.7	49041.6	16840.1	33008.5	21448.5	21332.7	13588.7
mia-41	ggag, 8	1733617	1733751	>	On the opposite strand of STM14_1976	135	ATGTCCAGTATACTAATGTCTATGGTATCTTTACATTTTCACCTTTCATGGTGTCGCTGCACTCATATCCAGTTGATATCTTATGGTATATTCAATCCATTCCCTTTGATGATTCCTGTCAAACCTCCTGATTAA	44	MSSILMSMVSLHFHLSWCRCTHIQLISYGIFNPFPLMIPVKPPD	N	3393.93	4407.67	17942	2079.02	348.19	136.96	2032.92	750.24
mia-42	gga, 8	1757190	1757234	>	On the same strand of STM14_1999	45	ATGAACGACGAACAAGTAGCGATGTTGAATGCGCGGTTATCGTAA	14	MNDEQVAMLNARLS	N	2776.85	3778	1993.56	1782.02	1044.57	6163.37	2335.7	1547.37
mia-43	ggagg, 5	1759667	1759849	< < <	dpbA / zntB	183	TCAGCAGGCGCGTATCCTCGCAGATCCGGGCGTTTGATGCGACATTTTAATCGGTTCTTCGTCCGGCGGCGGGTCGGGCATCGGCTGAGGACGGGGAAGCGGCTCAGGAATGGGAACAGGGTCAGTGGGAATCGGGTCCGACAAGGACGAGTGTAGATATAATAAGGTCAAAAGACAGCTCAT	60	MSCLLTLLYLHSSLSDPIPTDPVPIPEPLPRPQPMPDPPPDEEPIKMSHQTPGSARIRAC	N	137022	6503.12	113976	11502.8	2483	24	1850.69	345.91
mia-44	gag, 13	1764133	1764198	> > >	ogt / fnr	66	ATGAAGGCTATCTTTTATTATGAATATACAGGCAAAAAGTGCCTTATCGGTCACACTTTTATGTAA	21	MKAIFYYEYTGKKCLIGHTFM	N	167873	30911	38738.5	14276.4	1187.01	840.46	265.42	959.11
mia-45	No RBS	1818302	1818394	< < <	acnA / STM14_2071	93	ATGTTAACGTCAAATATAAAGTATTGGTCATGGACTGGCGCGTTTATATTATCGCTACTGTTCTGGGCCGAGTTAATCTGGATTGCCGTCTAA	30	MLTSNIKYWSWTGAFILSLLFWAELIWIAV	N	13884.3	7312.27	7234.7	3449.07	2358.71	4572.82	3139.38	4424.3
mia-46	agg, 6	1818675	1818803	< < <	STM14_2071 / cysB	129	ATGCCTTCTGAAAACCAGGAACCGCGCCGCGACCCTGAGCTCAAACGTAAAGCATGGCTGGCGGTTTTTGTGGGTTCTGCGTTGTTCTGGGTAGTGGTAGCGCTTGTTATCTGGCATTGGTGGGGCTAA	42	MPSENQEPRRDPELKRKAWLAVFVGSALFWVVVALVIWHWWG	N	72650.2	96866.3	107791	56413.3	4615.55	10033.4	9822.61	11139.1
mia-47	aggagg, 9	1864351	1864434	> < <	STM14_2126 / STM14_2127	84	TTGCCAGGAAGAAGTATTGATAAGATAACCAATAAGCCATGGCGCCATGGAGTGAAGTCTGCCTGTGGGGGCGATGAAGATTGA	27	LPGRSIDKITNKPWRHGVKSACGGDED	N	19834.7	5059.83	21893.6	3341.29	2424.9	1320.72	973.21	678.23
mia-48	gag, 5	1878769	1878843	< > >	ychP / ychN	75	ATGAACGAAAAACAATACGGCTCAACGTGTCGGCAACTTCTACAACAAAAGATAAGAGGAATGACATCAGAGTAA	24	MNEKQYGSTCRQLLQQKIRGMTSE	N	44985	34002	45453.2	11494	4596.12	2711.88	2335.7	3207.28
mia-49	ggag, 11	1947387	1947479	< < >	yobF / STM14_2222	93	TTAAACGTGTCTCGATCCGTCGCACAAATTACGAGAACCTTCACAAATTGACAGCACGTTTATGCAACAAAATTGCGAAAGATATATCCTCAC	30	MRIYLSQFCCINVLSICEGSRNLCDGSRHV	N	17019.4	5484.2	27009.5	7113.7	57956.9	14314.9	31644.9	24095.4
mia-50	agg, 9	1966113	1966241	> > <	STM14_2248 / STM14_2249	129	GTGAAAGATTCGTATTATACGCACAGCCCAGTTTACAGTTTATATAACAGCGCTATATGTTTTTGTATCCGTACCATGCCGCCTACAAGCGGCTGTCTGAGTACCTCTAGCCGTGCCAGGGGGTATTAG	42	MKDSYYTHSPVYSLYNSAICFCIRTMPPTSGCLSTSSRARGY	N	10655.4	5930.59	13908.6	2486.54	4858.47	2580.01	4662.34	1521.2
mia-51	No RBS	2002179	2002241	<	On the opposite strand of STM14_2305	63	ATGGGGCGCGGCGGCACCCGGTGGTGTTGCGCGACCGATTCGAAGGGAAGGCCATTGAGATAG	20	MGRGGTRWCCATDSKGRPLR	N	21157	8095.72	25631.5	2227.52	746.12	13	926.86	401.91
mia-52	No RBS	2117960	2118394	> > <	STM14_2461 / STM14_2462	435	ATGAGTAATTACTCAGACCTTTTCCAAATCATCAAGATCAGAGTTTGCCAGAACAATGATTTCCCAACTTATTCACTGGCAGGAACCAATAACTACCGCGCCAGCCAGGTATGGTATCGAATCGGACAGATATTCACCCTTGAATGCGTCCTCGCTGAATACAGAAGATGCTGCTCATCAGATTATTACCTGCTGGACAACGAAAAGGCACTTCACCACCTTATTTTTCAAATCACAAAGTGGAAATTGGAGGATATCAGAGGATTATCTCTTAATGACAGTCTGTTTATTATTTCAGACAGGCTAAAACCTGATTACATGCCAGCAGAAGCTGCGCAATTTCTCCGCTCGCTGAAACTGCCAGTCAATCATTATTCTGTTGACGATTTCTCGGAAGCG…	144	MSNYSDLFQIIKIRVCQNNDFPTYSLAGTNNYRASQVWYRIGQIFTLECVLAEYRRCCSSDYYLLDNEKALHHLIFQITKWKLEDIRGLSLNDSLFIISDRLKPDYMPAEAAQFLRSLKLPVNHYSVDDFSEADWDPRENSVFL	N	256428	131514	188495	101437	8068.42	6588.43	9396.49	15221.5
mia-53	agga, 4	2126096	2126128	>	On the same strand of STM14_2474 (mis-annotated)	33	GTGTCAGACAACTTCGCCGCGCGAAGAACATGA	10	MSDNFAARRT	N	7573.23	5151.82	1359.25	1215.01	5222.86	6163.37	3185.04	4411.93
mia-54	ggag, 8	2147786	2147872	> > <	asnU / erfK	87	ATGACACTCACTACTAATACAGATACTCCAGCCCATGAAAACCAGCAATGCGACAGGATATTTAAAGGCCAGGCCTGCCCGCGCTAA	28	MTLTTNTDTPAHENQQCDRIFKGQACPR	N	79475.4	105524	50526.4	28804.2	3782.07	3825.54	4765.36	3492.5
mia-55	agg, 13	2147872	2148093	>	On the opposite strand of erfK	222	ATGTTGACCGGCATTCCGGAACGGCGCTCCAGCACCTCATTAACCCGCGAAGTATCAACGTCATCCCCTTTGATAAACGTGCGCAGCACTGGCGTAACGGGCAATGGAACTTTTTTGTCTGACTCAAATTCAGCACGGTTGCGAGAAAGCGGTTCGTGTACCTCCAGCCAACGACTGCCATCCGGCTCTACCGAAAATTTAACGGGCCTGTCGATAATCTGA	73	MLTGIPERRSSTSLTREVSTSSPLINVRSTGVTGNGTFLSDSNSARLRESGSCTSSQRLPSGSTENLTGLSII	N	41652.8	45565.8	41622.3	12191.2	2893.75	3498.13	4866.04	2680.34
mia-56	gagg, 10	2198727	2198789	< < <	STM14_2560 / STM14_2562; On the opposite strand of STM14_2561	63	TTATGCGACATGGTCATTCTCCTTTACGGCGAATGCCGTCGCGTAAGCAAAAAATTGCCCCAT	20	MGQFFAYATAFAVKENDHVA	N	173223	1.09697e+06	411528	45823.3	6715.1	82471.7	13810.3	12459.4
mia-57	gga, 6	2200970	2201020	< > >	yeeZ / hisG	51	ATGACACGCGTTCAATTTAAACACCACCATCATCACCATCATCCTGACTAG	16	MTRVQFKHHHHHHHPD	N	15517.7	25001.5	14072.2	20833.9	28264.9	40968.3	37439.9	21969.4
mia-58	gga, 5	2322136	2322219	> > <	STM14_2680 / yohI	84	ATGAAAATTCTTCTATGGGCAATCTTAATTATTTTTCTGATTGGGCTGTTGGTGGTAACGGGCGTGTTTAAGATGATTTTCTGA	27	MKILLWAILIIFLIGLLVVTGVFKMIF	N	529090	50598.3	263791	24343.7	10072.7	1760.96	4379.43	2185.41
mia-59	ggag, 9	2567436	2567507	> > <	ddg / yfdZ	72	GTGAAATATTTCTTTATGGGCATTTCATTTATGGTCATCGTTTGGGCCGGTACTTTCGCCCTGATGATTTAA	23	MKYFFMGISFMVIVWAGTFALMI	N	55537	83824.5	40494.2	18934	6746.19	12326.7	4055.03	2373.81
mia-60	gagg, 5	2648414	2648473	> < >	acrD / yffB	60	ATGATTGAACGTGAACTGGGGAACTGGAAAGATTTTATCGAAGTCATGCTTCGTAAATAA	19	MIERELGNWKDFIEVMLRK	N	115239	25501.5	26913.1	27064.4	12796	3081.68	2238.38	6963.17
mia-61	No RBS	2673040	2673141	>	On the opposite strand of STM14_3072	102	ATGATCAGACGCTTAAAGAGCAACCGCGGGATATCCTGCCTGGGTGATAAGATCACATGCGCGGTTACTAAGATTCCCTCGACCGAATACAAAACCCGATAG	33	MIRRLKSNRGISCLGDKITCAVTKIPSTEYKTR	N	18784.6	6667.07	9674.63	2555.1	4454.79	2356.58	1831.92	1799.75
mia-62	agga, 7	2726631	2726747	< > <	STM14_3109 / sseB	117	ATGAAGGTACGATGCTTTTGTGTCGTGCTTCTTGTTTCTGGCACGTTGTGTCTTCACGCAGACAGAAGCTACCCAGGTAATTCTGTTCCCGTAACGCTCAACGTCCAGAGCAGGTAA	38	MKVRCFCVVLLVSGTLCLHADRSYPGNSVPVTLNVQSR	Y	8900.17	17436.9	12651.4	2570.22	36292.2	43459.6	33089.1	37277.6
mia-63	agg, 7	2782501	2782638	< > >	STM14_3165 / STM14_3166	138	ATGAAAAATAGTATATTTTTACCATTGCTTCTGGTGCTGTCGGCAACGACCTTTTCGGCATTGGTGATGGCTGCCAGTCATTCTCCCCACCAGATAATACAAAACATTTTTCCAGTGGCTGGCCGCCAGATATCCTGA	45	MKNSIFLPLLLVLSATTFSALVMAASHSPHQIIQNIFPVAGRQIS	Y	5734.8	6159.79	356566	4939.29	454.16	267.97	7574.09	366.97
mia-64	gagg, 8	2782815	2782955	< > >	STM14_3165 / STM14_3166 (mis-annotated)	141	TTGATAGGTCTAACAGGCTTGAATTACTTTTCTTTAAAAACTACTGCATGTAAAAGGGTCTCCTCTTGTTGTGATGAGATTCGTATATATTTATATCTTAGTGATTTATGGATCATACTTGTGGTTTTCCTTAGGAGGTAA	46	MIGLTGLNYFSLKTTACKRVSSCCDEIRIYLYLSDLWIILVVFLRR	N	10930.2	6631.6	177194	3838.92	777.87	524.54	15074.4	673.42
mia-65	gga, 7	2783545	2783730	> > >	STM14_3166 (mis-annotated)/ STM14_3167 (mis-annotated)	186	ATGCCGATCATAGCACCAATTCCCCGTACCGAACGACGCCTGATGCAGAAAACTATCCATAAAACGCGTGACAAAAACCATGCCCGCAGACTGACTGCCATGTTGATGCTGCAACCCGGGAGACAGTATCGGCCACGTTGCCAGAACGCTCTGCTACGCCCGTTCACCCATTGGACGCTGGATTAA	61	MPIIAPIPRTERRLMQKTIHKTRDKNHARRLTAMLMLQPGRQYRPRCQNALLRPFTHWTLD	N	7390.01	13253.5	14710.5	4203.55	421.2	596.45	2260.35	340.33
mia-66	gagg, 8	2846464	2846505	>	On the same strand of STM14_3249	42	ATGAACAGAGAAGAAATGCACTGTGATGTTGTCAAAATTTAA	13	MNREEMHCDVVKI	N	111074	153819	95050.1	32458.2	8207.35	7484.09	5700.22	5124.41
mia-67	agga, 7	2862027	2862074	>	On the same strand of STM14_3267	48	ATGAAGCTCACCCGGTTTTTCTTCGCATTCTTTTTTATCTTCCCCTGA	15	MKLTRFFFAFFFIFP	N	18223.1	10625.6	18689.6	12947.5	4243.57	3081.68	7542.36	5275.13
mia-68	gga, 11	2897891	2898028	> > <	STM14_3300 / STM14_3301	138	TTGCGAAACCCAAGGTGCATGCCGAGGGGCGGTTGGCCTCGTAAAAAGCCGCAAAAAAATAGTCGCAAACGACGAAACCTACGCTTTAGCAGCTTAATAACCTGCTTAGAGCCCTCTCTCCCTAGCCTCCGCTCTTAG	45	MRNPRCMPRGGWPRKKPQKNSRKRRNLRFSSLITCLEPSLPSLRS	N	1.56138e+06	3224650	1.11455e+06	5.78565e+06	3.17504e+06	4.13803e+06	3.94991e+06	4.13433e+06
mia-69	gagg, 6	2912535	2912558	> < >	STM14_3318 / STM14_3319 (mis-annotated)	24	TCACCTTCCTGCCAATAGTATCAT	7	MILLAGR	N	1735.53	428	251	34	24	15	19	16
mia-70	agga, 7	2946530	2946841	<	On the opposite strand of STM14_3349	312	ATGCCTGGATGTATAAGTGCCTGTTCGTGCGTTGTCAGCTCGACGCCTCCCGATCCTAAGGCCCCCCCTAAGCCTAAGTGGATAGAGTTAAAAGGTTATTGTGTTACATGTACTAGTCAGGAGGATATTCGTCCACCTAAAGAGGGTGAACCAAAGCAAAAAATGACACCCAGGGATTTAGTGCTGTTACGCGGTCTTTTAAAAGACCTGGGGGTAACACAAAATCCCTGGCAAGACCCGACAGTAAAACCCAATAACTGTGGGTTGCCATATTTTCCAGTAGTTCCTGGAGAACGAGAAACTGATGTTTGA	103	MPGCISACSCVVSSTPPDPKAPPKPKWIELKGYCVTCTSQEDIRPPKEGEPKQKMTPRDLVLLRGLLKDLGVTQNPWQDPTVKPNNCGLPYFPVVPGERETDV	N	10146.2	6538.85	108544	16770.7	2008.79	888.95	6793.74	2576.7
mia-71	No RBS	2950889	2950921	>	On the opposite strand of STM14_3355	33	ATGGAATTGATTAACACGGTATGTTACAGATAA	10	MELINTVCYR	N	2524.41	5151.82	24466.4	607.51	2374.03	2241.22	14863.5	3260.99
mia-72	agga, 4	2950991	2951056	< > >	STM14_3355 / STM14_3356	66	ATGATGATGACAACTACCCTTTTATCTCTTCTGGCCTGGCATACCGTCAGTAGATTAAAGGAGTAG	21	MMMTTTLLSLLAWHTVSRLKE	N	3786.62	2575.91	23107.2	911.26	3086.24	2241.22	16721.5	863.2
mia-73	No RBS	2980984	2981265	>	On the opposite strand of STM14_3396	282	ATGGAAAGCCCTGCATCCCCATCTGCTCCCAGGCCAATAGCGCCCGTTCAAGGATTCGAAGGTCGTTCACCGATAGCTATCCGTGATATTCCGGTGGCTTTTGCATCGGGTTGTAAGGCCGTTTACCCGGCTTTCGCCCCTCCCGCTTATCGTTCTCTCCTGATTTTTTCATGCAGGCACTCACGCTTTTCTCGTCATTCCTGGATTTGCCGCAGGCGGCGCTTTACCGGGCCCAATGTTCCCGCTGACGTCTCAGTCTGCGTATCATTGGTTGCTTTATAG	93	MESPASPSAPRPIAPVQGFEGRSPIAIRDIPVAFASGCKAVYPAFAPPAYRSLLIFSCRHSRFSRHSWICRRRRFTGPNVPADVSVCVSLVAL	N	60263.6	46119.8	30539.7	11090.2	4333.86	5114.28	2919.62	2918.16
mia-74	aggag, 13	3001789	3001845	>	On the opposite strand of STM14_3427	57	GTGACCGGGGTGAGCGAGGAAAGCCAACGCACATGCAGCGTGAAGTATGACGGGTAA	18	MTGVSEESQRTCSVKYDG	N	1461.5	2982.64	1573.86	2813.71	84115.5	47036.2	28274.2	31983.9
mia-75	agg, 9	3026465	3026527	<	On the opposite strand of STM14_3457	63	ATGAAAATAATTCTTATTTGCGAAATGGCGACAATATGCAGTGATAGTGCTAAAGAGGGATAA	20	MKIILICEMATICSDSAKEG	N	11900.8	6746.44	8543.83	3500.39	248.71	293.49	556.12	200.96
mia-76	No RBS	3032132	3032212	< < >	sprB / STM14_3464	81	TTAAATTTGCTGTTTTACTTTACTGTAATCTCTTAGAGTACAACGATTGCCCGGCGCCTGGTGGCCATGTATGTCTGACAA	26	MSDIHGHQAPGNRCTLRDYSKVKQQI	N	51937.4	1049.45	0	990.01	16055.5	228.27	432.54	1015.95
mia-77	agg, 4	3033441	3033542	< < <	STM14_3466 / orgC	102	TCAGAATAAAACGGCTGGCAGACATCTTAATAATCCATATACATCAATAAGATAGACACACTGGCATGGTGCATTTTCTGCATTATTTGCTGATATATACAC	33	MYISANNAENAPCQCVYLIDVYGLLRCLPAVLF	N	16742.8	11667.4	30343.2	3537.83	5683.7	1994.03	2976.87	806.78
mia-78	gag, 4	3033467	3033586	< < <	STM14_3466 / orgC	120	TTAATAATCCATATACATCAATAAGATAGACACACTGGCATGGTGCATTTTCTGCATTATTTGCTGATATATACACCATACCTTATCACAAATCGCCAGCAATGGGGGTTCACCAGTCAA	39	MTGEPPLLAICDKVWCIYQQIMQKMHHASVSILLMYMDY	N	46165.2	20542.9	48966.8	4510.74	10184.6	4776.61	11191.9	3534.34
mia-79	agga, 7	3034796	3034855	>	On the opposite strand of orgA	60	GTGCTAAAGATTCAGGTAAAAATTCATTTAGGGCATTTAACTGTGCATACCCGACGCTAA	19	MLKIQVKIHLGHLTVHTRR	N	60396.5	172844	51583.4	12362.8	10184.6	4314.36	2724.98	2848.57
mia-80	ggagg, 13	3039113	3039142	> > >	hilD / hilA	30	TTGTTCTGTCCGGAAGACAGCTTATACTGA	9	MFCPEDSLY	N	8330.56	0	0	0	4178.29	0	583.92	0
mia-81	aggag, 7	3070223	3070318	>	On the opposite strand of STM14_3510	96	GTGGTCATCGAAAACAGTGTAGAGTTTTTGAGCTGGGTTAGCTTCGAAAACGATTTTTCCAGAGCGACTGAGTGCAGGCTTAACATTGATACTTAA	31	MVIENSVEFLSWVSFENDFSRATECRLNIDT	N	7376.01	7083.76	9344.82	1044.15	1468.93	1540.84	1520.64	989.09
mia-82	agg, 10	3070308	3070376	< > >	STM14_3510 / mutS	69	TTGATACTTAACTTGTTGATAATGAAAGGCTGGCTGAGAGTTGTTTTCAAAGTATCACCCCTGTTGTAG	22	MILNLLIMKGWLRVVFKVSPLL	N	1810.99	4927.83	1300.15	290.55	2497.89	4823.5	1861.79	1467.86
mia-83	No RBS	3096835	3097008	> > <	iap / ygbF	174	ATGCTGGTGAAACGTGTTTATCCCCGCTGGCGCGGGGAACATTTTTCAGCCCTTGTCGACTGCGGAACGCCCCTCGGTTTATCCCCGCTGGCGCGGGGAACACGCGAAATAGTGGGGAAAAACCCCTGGTTAACCCGGTTTATCCCCGCTGGCGCGGGAAACACTAGGCCTTGA	57	MLVKRVYPRWRGEHFSALVDCGTPLGLSPLARGTREIVGKNPWLTRFIPAGAGNTRP	N	8857.2	6350.96	4897.97	2419.55	9545.23	5738.31	7315.84	6657.58
mia-84	gagg, 7	3120189	3120284	< < <	pyrG / mazG	96	ATGAAAGTTTGTGGCGTAGGTCATGTTCGGGTATACTGCTTTCCCGTCCTGGTTATTCCATCGTCTTTTAAACCTAACTTCTCAGGTTCCGCATGA	31	MKVCGVGHVRVYCFPVLVIPSSFKPNFSGSA	N	27768.5	131935	38313.8	17541.8	29705	65100.6	19220.8	17803.6
mia-85	gga, 7	3184958	3185077	>	On the same strand of STM14_3630	120	GTGGGCAGTTGTAATTTCCGCAGTAGGGTTGGCTTTTGCGGTATCCGGATGCAGCAGCGATTATGTAATGGCGACGAAAGATGGTCGTATGATCCTGACCGATGGAAAACCACAAGTTGA	39	MGSCNFRSRVGFCGIRMQQRLCNGDERWSYDPDRWKTTS	N	323850	46044.4	94943.3	22219.5	12404.3	3389.85	2676.32	1899.05
mia-86	gga, 10	3185074	3185250	> > >	STM14_3630 / STM14_3631	177	TTGACGATGATACCGGTCTGGTCAGCTATACCGATGCACAGGGAAACGAGATGCAAATCAACCGTGACGAAGTATCCCAAATCATCGAACGTTAAGCGGTGGCCTGTGATCGAGGTCAGCGTTCTGCAAGCCTTCAGGCTGCGTCCCGTAACGGTGCGTGGCGACCACGCCCGGTAA	58	MTMIPVWSAIPMHRETRCKSTVTKYPKSSNVKRWPVIEVSVLQAFRLRPVTVRGDHAR	N	163787	16328.7	44855.1	11779.5	9294.92	2298.2	2969.11	1359.02
mia-87	gag, 4	3241252	3241356	> > >	ygfE / ygfA	105	TTGCAAGCGGGCCAGTCCCCTGAGCCGATATTTCATACCACAAGAATGTGGCGCTCCGCGGTTGGTGAGCATGCTCGGTTCGTCCGAGAAGCCTTAAAACTGTGA	34	MQAGQSPEPIFHTTRMWRSAVGEHARFVREALKL	N	124958	46955.2	179848	178711	4.24439e+06	2.93887e+06	3.18923e+06	3.32665e+06
mia-88	gga, 8	3265971	3266192	< < <	STM14_3726 / STM14_3727	222	TTGTCAGCGATTAACCGGGCCTGCCGCCAAAAACAAGCCCGGAGAGAGGGAATCAGGCTTCGTAAACGCTCAGCTTATCCCAGTCAAACTCTACGCCAATGCCGTAGGTGTCCGGTGCCACGGCGCGATAATTGTCGACCACCAGCGGATGTTTGGTATATTGATCGATTGGGAAACTGTGAACCTCCAGTCAGCCAGTCTCGAATGCGGAAACCAGTCTGA	73	MSAINRACRQKQARREGIRLRKRSAYPSQTLRQCRRCPVPRRDNCRPPADVWYIDRLGNCEPPVSQSRMRKPV	N	7692.63	8423.93	6061.5	2257.63	3881.85	6080.08	5102.76	4847.42
mia-89	ggagg, 12	3270250	3270399	< < >	yqgB / yqgC	162	GTGGAGGTGATACGAGATAATGAACCGTTGTATTCTGCTGAATCTGTCGCATCGTTCTGGTGCGCGCATGTCCCCCGCAATCTGCATCTCTGCTTTGCATACCTGCCGATGTTATACCCATCTCGGCGCTTCTCAGGATTCCAGAGCCGGCAATGGCGCTGA	53	MEVIRDNEPLYSAESVASFWCAHVPRNLHLCFAYLPMLYPSRRFSGFQSRQWR	N	140509	209113	108250	49985.6	12326	45239.1	18335.2	17555.6
mia-90	agg, 90	3272296	3272334	< > >	STM14_3734 / galP	39	ATGGTTATAAGATTATTAAAACTATTATTTTTCAGATAA	12	MVIRLLKLLFFR	N	52333	4359.24	16101.8	0	2410.55	474.11	1497.24	324.62
mia-91	No RBS	3436416	3436442	< < <	garL / STM14_3932	27	GTGGCGGCATCACATGTAGAGAATTAA	8	MAASHVEN	N	298241	11775.6	9514.72	10414.4	10852.7	2321.27	1289.18	1589.39
mia-92	No RBS	3436482	3436535	< < <	garL / STM14_3932	54	TTGTGCTACAGGATGTGTACCACATTAGAAATAGAATGCGGAGACCCATTCTGA	17	MCYRMCTTLEIECGDPF	N	79300.5	5993.95	3162.86	2184.69	8537.37	1659.37	1796.69	1257.92
mia-93	No RBS	3563785	3563853	>	On the opposite strand of STM14_4074	69	ATGAAGGTATATTTTGTTTTTTGCCCGAAAATGGCAGAAGATAGCCACACAATGACTGGCAAATCATGA	22	MKVYFVFCPKMAEDSHTMTGKS	N	32396.6	0	0	0	9865.4	0	0	0
mia-94	gagg, 9	3656687	3656713	< < <	aroK / hofQ	27	ATGTCCTGCTGCGCTGGGTGTCTGTGA	8	MSCCAGCL	N	302368	278461	830.65	371.25	13637.5	15482	12471	351.68
mia-95	gga, 11	3663976	3664047	< > >	STM14_4207 / yrfF	72	ATGCTCAAGTTCAACTCCACGCTTGCCGATAGCCAACCACAGAAAAATGTTTATTGGACAGGGTGCGACTGA	23	MLKFNSTLADSQPQKNVYWTGCD	N	12676.9	28335	12351.4	3777.11	31110.1	47163.2	12863.3	23302.3
mia-96	agg, 7	3821882	3821989	<	On the same strand of STM14_4365 (pseudogene)	108	ATGACGCTTACGCAGTTGGGCGTGGTCTTCTGGCACGATCTGGCAGCGCCGATCATTGCTGGCATTATCGCCAGTGTGATCGTCAACTGGCTACGTGACAGGAAGTAA	35	MTLTQLGVVFWHDLAAPIIAGIIASVIVNWLRDRK	N	12341.6	22038.4	11629.1	4455.05	14507.9	38349.8	12543.6	12425.9
mia-97	agga, 6	3851262	3851315	> < <	STM14_4400 / STM14_4401	54	GTGATGCAAGAAAGCAACGGAATGGATAATTCGATTGCGGACAATGTTATTTAG	17	MMQESNGMDNSIADNVI	N	12148.7	9445.01	7475.85	8353.21	5658.1	4622.52	5433.74	3077.16
mia-98	ggag, 7	3965291	3965383	> > >	STM14_4523 / rhuM	93	ATGATATCGTGGCGAAGCATTATCCGGGGGCGCTGCCCGCAAAATAAACGCTATCTGCGTAATAAGCTTCACCAGGAATTTCTGGCATACTAG	30	MISWRSIIRGRCPQNKRYLRNKLHQEFLAY	N	0	0	0	556.88	39896.8	33898.5	43632.1	38391.2
mia-99	ggag, 8	3971201	3971320	>	On the same strand of STM14_4527 (misL)	120	GTGGGTATTGAAGGACAAGTTACCCCGCGCCTGAACGTATGGGGTAACGTGGCGCAACAGGTGGGTGACACAGGTTATAGTGATACCCAAGGAATGCTGGGGATGAAATACAGTTTCTGA	39	MGIEGQVTPRLNVWGNVAQQVGDTGYSDTQGMLGMKYSF	N	6170.78	6296.67	2491.95	742.51	1740.95	2739.27	1946.42	1641.15
mia-100	ggag, 6	3971348	3971395	> < <	misL / fidL	48	ATGAAACCTATCAGCCAAATGAAAGCGTTTCCGGGTAAAAGCCGCTGA	15	MKPISQMKAFPGKSR	N	7613.95	4570.17	3376.19	1293.4	1516.31	1192.91	941.81	272.26
mia-101	gagg, 7	3975021	3975107	< < <	cigR / mgtB	87	ATGCAAAAAAGAGGGTTGGACAAAATTTTTTATCAGGTTGTCCTGATAGCAATCATCCTGATTTTACTGACTATCTGGATACGATAA	28	MQKRGLDKIFYQVVLIAIILILLTIWIR	N	9718.98	19126.2	10840	1169.45	652.86	1540.84	924.55	422.01
mia-102	gagg, 8	3975120	3975212	< < <	cigR / mgtB	93	ATGAATCGCTCACCCGATAAAATCATCGCGCTGATATTTTTACTGATTAGCCTGTTGGTGTTGTGTTTAGCCCTCTGGCAAATCGTTTTCTAA	30	MNRSPDKIIALIFLLISLLVLCLALWQIVF	N	18223.1	14167.5	5606.89	2505.96	652.86	1155.63	608.25	263.76
mia-103	aggag, 4	3979098	3979139	<	On the opposite strand of STM14_4539	42	ATGTTGGACAGTCACTTTTACGTAAATCATCTGGCAAGTTAA	13	MLDSHFYVNHLAS	N	957.54	0	178905	1152.17	540.3	637.59	41613	291.04
mia-104	gga, 7	4058930	4058968	< < >	dnaA / STM14_4633	39	GTGAGAAACAGAAGATCTCTTGCTCAGTTTAGGCTATGA	12	MRNRRSLAQFRL	N	895.76	914.03	146623	1940.1	673.92	1789.36	53118.3	612.6
mia-105	No RBS	4078426	4078488	< > <	pstS / STM14_4653	63	ATGGAAATAAAAAAAGCTGGCCCGGGGAGACACCAGACCAGCCTGCAGGGGGAGATGAATTAG	20	MEIKKAGPGRHQTSLQGEMN	N	33718.9	42502.6	595932	11933.2	3730.61	11006	50467.8	3315.8
mia-106	No RBS	4097698	4097835	< < <	gidA / mioC	138	GTGGATAAATCTGGTGGAAAGCTTGGATCAACCGGTAGTTATCCAAAGAATAACCGTTGTTCACTTTTTGAGTTGTGTATAAGTACCCGTTTTGATCCCAGCTTATACGGACCACGATCACCGATCATTCACAGCTAG	45	MDKSGGKLGSTGSYPKNNRCSLFELCISTRFDPSLYGPRSPIIHS	N	42720.8	32694.3	98911.3	15421.3	2008.79	2844.63	5689.52	2272.36
mia-107	gagg, 8	4122611	4122661	> > >	ilvL / ilvG	51	GTGAATAACAGCATAAAATTCTGTTTCTCAAGATTTACGACGGGGATGTAA	16	MNNSIKFCFSRFTTGM	N	23801.6	18890	7119.86	7000.79	2735.78	2641.44	1853.73	2712.92
mia-108	agg, 11	4133110	4133268	>	On the same strand of STM14_4708	159	ATGAACATAATGAAAAACGCAGAATTTCCAGACGACTGGCTTTTAGGGCTACGCCAGGTCGTACGCGACCCAGTGCTCTATGAATTACTCAAATACTGCCCGTTGGAAATCATGCAGTACAGGGCGTTTATGCGATGTCGCTTGAGTATGTTCTGCTGA	52	MNIMKNAEFPDDWLLGLRQVVRDPVLYELLKYCPLEIMQYRAFMRCRLSMFC	N	19619.1	24023.2	9751.11	4067.65	6698.88	20365.9	6050.81	6376.03
mia-109	agga, 9	4159777	4159827	< > >	hemC / cyaA	51	GTGTCGTCAATGACAGTGAATAATGACGAGAAACCGCCAGCCCGTATTTAA	16	MSSMTVNNDEKPPARI	N	2614	1666.77	857	786.18	1145	618	915.96	620.6
mia-110	agg, 7	4159904	4159918	< > >	hemC / cyaA	15	TTGATCACGTTTTAG	4	LITF	N	22005.2	24592.7	14105.4	5043.45	689.81	1162.9	550.87	238.87
mia-111	agg, 13	4159978	4160019	< > >	hemC / cyaA	42	TTGACATACGGTTTATCCCGAATGGCGACGGTCAAGTACTGA	13	MTYGLSRMATVKY	N	12250.8	8333.83	4397.56	3537.83	7373.45	1812.75	7556.67	4095.98
mia-112	agga, 8	4171654	4171710	< > >	STM14_4753 / corA	57	TTGGACACACCCAGTAGATACTGGCTCATTATCCTGTCATCCAGGATCAACTCCTAA	18	MDTPSRYWLIILSSRINS	N	62495	84254	137846	54982	1044.57	1749	2973	1926
mia-113	agg, 10	4171723	4171791	< > >	STM14_4753 / corA	69	TTGCTGATAGCCTTAGCGGTTGTCAGCGACCTTTCATTTTTTCCCGTCGCGTTGAGTCAGGCTGTTTAA	22	MLIALAVVSDLSFFPVALSQAV	N	991.73	2023.93	0	954.65	17907	14527.9	15849.4	13263.2
mia-114	gga, 6	4226218	4226328	< < <	STM14_4816 / glnG	111	ATGTTAGAATCTATTATTAATCTGGTATCGAGTGGAGCGGTCGACAGCCACACGCCACAAACTGCGCTAGCCGCCGTGTTGTGTGCCGCGCTGGTGGGACTGTTCAGCTGA	36	MLESIINLVSSGAVDSHTPQTALAAVLCAALVGLFS	N	58460.1	140184	187290	20751.1	5497.75	15246.2	14342	6219.1
mia-115	aggag, 13	4229041	4229103	< < <	STM14_4819 / glnA	63	TCAAAAACTCCTGACGCCTTTCACGCTGCTGCTGCGTTGGCTGCCTTCGCTTACCCCAGTCAC	20	MTGVSEGSQRSSSVKGVRSF	N	1207.33	1231.96	650.07	581.09	4995.78	20633.9	12947.9	5779.71
mia-116	agg, 7	4375412	4375510	>	On the same strand of STM14_4983	99	TTGATGCCCTTTTTGCACGCTTTCACACCAGAACCTGGCTCATCAGTGATTTTATTTGTCATAATCATTGCTGAGACAGGCTCTGTAGAGGGCGTATAA	32	MMPFLHAFTPEPGSSVILFVIIIAETGSVEGV	N	126835	286414	240440	76939.9	18350.6	35647.6	26250.3	17336.6
mia-117	gga, 9	4460241	4460285	> > <	yjbA / malG	45	TTGAGGGCAGTGGCATTGCCCGTTGCCGGGCAGGTACTTCGATAA	14	MRAVALPVAGQVLR	N	1322.31	2698.57	2847.94	3500.39	32580.7	78362.8	32254.9	64105.4
mia-118	agga, 11	4472393	4472512	<	On the opposite strand of dgkA	120	ATGATAAGTAAAACGGAACCTATCAATAACACACGGGTAATCGCATCCACATCCAGCCAGCAGGCGATGATGACGCCCAGCAATACCGCGAGGCTTTCCTGGCGAAACGCCGCTTCGTGA	39	MISKTEPINNTRVIASTSSQQAMMTPSNTARLSWRNAAS	N	9676.91	8586.37	5436.98	4455.05	52861.7	99360.9	37040.9	32290.2
mia-119	agg, 9	4485880	4486020	>	On the opposite strand of STM14_5110	141	ATGAGGCGGATGACCGTAGACCGGATACGGCTGCCGAGGGCGATTTGCGCATTATTGGCGCGTAGCCTGGCGAGGTCCCGCTGTCCTTCCAGCAGAATAATCATATCGTCGTCGTCCAGCCAGCCGCGAGCATGTTCCTGA	46	MRRMTVDRIRLPRAICALLARSLARSRCPSSRIIISSSSSQPRACS	N	4628.09	1889	19935.6	891.01	4526.48	821.78	6228.53	1266.03
mia-120	gagg, 5	4529456	4529506	>	On the same strand of STM14_5142	51	TTGTCCAGGTTACTAACTCTAAAGTGGTATTTTACATACACTTACAATTGA	16	MSRLLTLKWYFTYTYN	N	159669	235181	295296	54797.1	4961.72	10323.6	7980.3	5169.63
mia-121	gagg, 5	4590229	4590333	> > <	yjeI / yjeJ	105	ATGGTTAGCGTTTTTCCTGCGATGATGCCATGCGTAGATTATGCAACGCGCGCATGCATTGATCTTGCGTCAGACGCGCTGCTTTACCGGTTCCAAGCGTTCTGA	34	MVSVFPAMMPCVDYATRACIDLASDALLYRFQAF	N	4135.74	1808.62	6044.31	2132.74	2555.87	2622.71	1946.42	1750.89
mia-122	gagg, 9	4591257	4591325	>	On the opposite strand of STM14_5212	69	GTGTATTTAACGAAGGTTAGTTTATCCTCGCCAAAGGGTGAGGAGAATCGCGGGGGAGTCTCCTCGTAA	22	MYLTKVSLSSPKGEENRGGVSS	N	12250.8	3333.53	2638.54	1179.28	2150.59	1	801.47	372.36
mia-123	No RBS	4654386	4654484	>	On the opposite strand of STM14_5288	99	ATGACAAACAGTGAAACCCGATATCGTTCCAACCGTCGCCAGAAGAAGGCGAAACCGCCCCATCCGGCCGATTTTTTGCGAGTGTTCACAGAAAGGTGA	32	MTNSETRYRSNRRQKKAKPPHPADFLRVFTER	N	7933.86	10524.4	5980.68	4582.33	9550.37	5106.79	4949.46	4521.54
mia-124	agg, 11	4654493	4654558	>	On the opposite strand of STM14_5288	66	ATGAAAGCTATTATCAAAACCGCTGACGGTATCACAGTTGGCGGAACCCTTAACGATCGGGTATAA	21	MKAIIKTADGITVGGTLNDRV	N	41652.8	28335	29253.3	15399	454.16	2411.75	2369.55	1834.83
mia-125	agg, 11	4656097	4656159	< > >	STM14_5291 / ytfK	63	ATGCACACTGGAAACGACGTAGATATGGTCTATAGTCATATGGCATTAAAATTTGCGCCTTAA	20	MHTGNDVDMVYSHMALKFAP	N	26927	11162.3	14498.6	4252.55	7913.42	1867.69	2123.36	2429.76
mia-126	ggagg, 4	4712327	4712380	< > >	treR / mgtA	54	ATGGACCCTGAACCCACCCCTCTCCCGCGATGGAGAATTTTCCTTTTCCGGTAA	17	MDPEPTPLPRWRIFLFR	N	8835.44	6439.78	2038.87	1518.77	1899.22	1120.61	1592.52	959.11
mia-127	gagg, 5	4768783	4768806	< < <	STM14_5401 / STM14_5402	24	TCAGATGATGACATTCTCCAGCAT	7	MLENVII	N	160661	18890	59806.8	13046.9	40788	20251.1	38742.9	6028.72
mia-128	ggag, 6	4786288	4786323	< < >	STM14_5426 / STM14_5427	36	TCAGAACGTGTGGCGATTACAGATAACAATCAGCAC	11	MLIVICNRHTF	N	420385	245570	1.23435e+06	93927.2	7544.13	14038.8	58392.5	10784.7
mia-129 (from pseudogene)	gagg, 8	3290577	3290807	>	On the same strand of STM14_3160 (pseudogene)	231	ATGAATCTTAAGCTGCAGCTTAAAATACTCTCTTTTCTGCAGTTCTGTCTGTGGGGAAGCTGGCTCACTACCCTGGGCTCGTATATGTTCGTCACCTTAAAATTTGACGGCGCATCTATTGGCGCAGTTTATAGTTCACTGGGGATTGCCGCCGTCTTTATGCCGACCTTGCTAGGCATTGTGGCTGACCAATGGCTTCGGCTGTATCCTGGGCGGCATTGTGAGCGGTAA	76	MNLKLQLKILSFLQFCLWGSWLTTLGSYMFVTLKFDGASIGAVYSSLGIAAVFMPTLLGIVADQWLRLYPGRHCER	N	4628.09	11806.3	11213.8	18377.1	3481.91	1027.23	1946.42	879.19
mia-130 (from pseudogene)	gag, 7	3290809	3290964	>	On the same strand of STM14_3160 (pseudogene)	156	GTGGTGGAGTATTACACTCAAAACGGCATTACCGACTGGCAGACCGTGTGGCTCATCTTCGCAGGCTACTCGCTGGTGCTGGCCTTCGCGTTCGTAGCCTTGTTCAAATACAAACACGTTCGCGTTCCGGCAAGTTCGCAACCCGTTGCACATTAA	51	MVEYYTQNGITDWQTVWLIFAGYSLVLAFAFVALFKYKHVRVPASSQPVAH	N	119752	35418.8	37379.3	21718.4	1958.57	1	243.3	791.27
a Orientation of unannotated ORFs with respect to neighboring genes (>, clockwise; <, counterclockwise). When a unannotated ORF is present on the opposite strand or internally on the same strand of an annotated gene, only the orientation of the unannotated ORF is shown.
b Flanking gene(s) overlapped with an unannotated ORF is in boldface.
c Unannotated ORFs with alternative start codons are highlighted with green for GTG and blue for TTG.
