# Supplementary material for: Identification of Unannotated Small Genes in Salmonella
Source: G3 (Bethesda). 2017 Jan 25;7(3):983–9. doi: 10.1534/g3.116.036939 (PMC5345727; doi:10.1534/g3.116.036939)
Supplement: Supplementary file 9 [file 983TableS11.xlsx]

## Sheet: Table S11
Table S11 List of sORFs identified as unannotated in strain 14028s but previously identified and annotated in E. coli K-12 MG1655
E. coli K-12 MG1655	aa length	S. Typhimurium 14028s	References
KdpF (b4513)	29	STM14_0826, 65 aa; Mis-annotated	Gaßel et al., J Biol Chem (1999) 274:37901-37907
Blr (b4409)	41	STM14_1761, 51 aa; Mis-annotated	Wong et al., Mol Microbiol (2000) 37:364-370
EcnA (b4410)	41	STM14_5215, 58 aa; Mis-annotated	Bishop et al., J Mol Biol (1998) 280:583-596
YpfM (b4606)	19	Unannotated	Hemm et al., Mol Microbiol (2008) 70:1487-1501
YneM (b4599)	31	Unannotated	Hemm et al., Mol Microbiol (2008) 70:1487-1501
YmiA (b4522)	42	Unannotated	Hemm et al., Mol Microbiol (2008) 70:1487-1501
SgrT (b4662)	43	Unannotated	Hemm et al., Mol Microbiol (2008) 70:1487-1501
AcrZ (;YbhT) (b0762)	49	STM14_0906, 83 aa; Mis-annotated	Hobbs et al., PNAS (2012) 109:16696-16701
IlvX (b4669)	16	Unannotated	Hemm et al., Mol Microbiol (2008) 70:1487-1501
YoeI (b4678)	20	Unannotated	Hemm et al., Mol Microbiol (2008) 70:1487-1501
YobI (b4677)	21	Unannotated	Hemm et al., Mol Microbiol (2008) 70:1487-1501
YnbG (b4674)	21	Unannotated	Hemm et al., Mol Microbiol (2008) 70:1487-1501
YpdK (b4680)	23	Unannotated	Hemm et al., Mol Microbiol (2008) 70:1487-1501
YoaJ (b4675)	24	Unannotated	Hemm et al., Mol Microbiol (2008) 70:1487-1501
YrbN (b4685)	26	Unannotated	Hemm et al., Mol Microbiol (2008) 70:1487-1501
YohP (b4679)	27	Unannotated	Hemm et al., Mol Microbiol (2008) 70:1487-1501
YdgU (b4601)	27	Unannotated	Hemm et al., Mol Microbiol (2008) 70:1487-1501
YnhF (b4602)	29	Unannotated	Hemm et al., Mol Microbiol (2008) 70:1487-1501
YshB (b4686)	36	Unannotated	Hemm et al., Mol Microbiol (2008) 70:1487-1501
