# Supplementary material for: Identification of Unannotated Small Genes in Salmonella
Source: G3 (Bethesda). 2017 Jan 25;7(3):983–9. doi: 10.1534/g3.116.036939 (PMC5345727; doi:10.1534/g3.116.036939)
Supplement: Supplementary file 10 [file 983TableS12.xlsx]

## Sheet: Table S12
Table S12 Conservation of mia in S. Typhimurium strains
mia-# (missing in annotation)	Length (aa)	Conservation checked by BLAST	14028s	LT2	T000240	4/74	UK1	798	U288	CFSAN001921	D23580	SL1344	DT104
mia-1	15	Conserved in Enterobacteriaceae	Οa	Ο	Ο	Ο	Ο	Ο	Ο	Ο	Ο	Ο	Ο
mia-2	87	S. Typhimurium-specific	Ο	Ο	Ο (A)b	Ο	Ο (A)	Ο (A)	Ο (A)	Ο (A)	Ο (A)	Ο (A)	Χc
mia-3	15	Salmonella-specific	Ο	Ο	Ο	Ο	Ο	Ο	Ο	Ο	Ο	Ο	Ο
mia-4	10	Unassigned	Ο	Ο	Ο	Ο	Ο	Ο	Ο	Ο	Ο	Ο	Ο
mia-5	30	Salmonella-specific	Ο	Ο	Ο	Ο	Ο	Ο	Ο	Ο	Ο	Ο	Ο
mia-6	37	Conserved in Enterobacteriaceae	Ο	Ο	Ο	Ο	Ο	Ο	Ο	Ο	Ο	Ο	Ο
mia-7	35	Conserved in Enterobacteriaceae	Ο	Ο	Ο	Ο	Ο	Ο	Ο	Ο	Ο	Ο	Ο
mia-8	34	Conserved in Enterobacteriaceae	Ο	Ο	Ο	Ο	Ο	Ο	Ο	Ο	Ο	Ο	Ο
mia-9	20	Salmonella-specific	Ο	Ο	Ο	Ο	Ο	Ο	Ο	Ο	Ο	Ο	Ο
mia-10	31	Salmonella-specific	Ο	Ο	Ο	Ο	Ο	Ο	Ο	Ο	Ο	Ο	Ο
mia-11	27	Salmonella-specific	Ο	Ο	Ο	Ο	Ο	Ο	Ο	Ο	Ο	Ο	Ο
mia-12	9	Unassigned	Ο	Ο	Ο	Ο	Ο	Ο	Ο	Ο	Ο	Ο	Ο
mia-13	20	Salmonella-specific	Ο	Ο	Ο	Ο	Ο	Ο	Ο	Ο	Ο	Ο	Ο
mia-14	15	Salmonella-specific	Ο	Ο	Ο	Ο	Ο	Ο	Ο	Ο	Ο	Ο	Ο
mia-15	27	Salmonella-specific	Ο	Ο	Ο	Ο	Ο	Ο	Ο	Ο	Ο	Ο	Ο
mia-16	25	Conserved in Enterobacteriaceae	Ο	Ο	Ο	Ο	Ο	Ο	Ο	Ο	Ο	Ο	Ο
mia-17	21	Conserved in Enterobacteriaceae	Ο	Ο	Ο	Ο	Ο	Ο	Ο	Ο	Ο	Ο	Ο
mia-18	21	Conserved in Enterobacteriaceae	Ο	Ο	Ο	Ο	Ο	Ο	Ο	Ο	Ο	Ο	Ο
mia-19	17	S. Typhimurium-specific	Ο	Ο2d	Ο2	Ο	Ο	Ο	Ο2	Χ	Ο	Ο	Ο
mia-20	61	Salmonella-specific	Ο	Ο	Ο	Ο	Ο	Ο	Ο	Ο	Χ	Ο	Ο
mia-21	27	Salmonella-specific	Ο	Ο	Ο	Ο	Ο	Ο	Ο	Ο	Ο	Ο	Ο
mia-22	16	S. Typhimurium-specific	Ο	Ο	Ο	Ο	Ο	Ο	Ο	Ο	Ο	Ο	Ο
mia-23	22	Salmonella-specific	Ο	Ο	Ο	Ο	Ο	Ο	Ο	Ο	Ο	Ο	Ο
mia-24	23	Pathogenic Salmonella-specific	Ο	Ο	Ο	Ο	Ο	Ο	Ο	Ο	Ο	Ο	Ο
mia-25	13	14028s specific (Gifsy-3)	Ο	Χ	Χ	Χ	Χ	Χ	Χ	Χ	Χ	Χ	Χ
mia-26	18	Salmonella-specific	Ο	Ο	Ο	Ο	Ο	Ο	Ο	Ο	Ο	Ο	Ο
mia-27	30	Pathogenic Salmonella-specific	Ο	Ο	Ο	Ο	Ο	Ο	Ο	Ο	Ο	Ο	Ο
mia-28	24	Salmonella-specific	Ο	Ο	Ο	Ο	Ο	Ο	Ο	Ο	Ο	Ο	Ο
mia-29	14	S. Typhimurium-specific	Ο	Ο	Ο	Ο	Ο	Ο	Ο	Ο	Ο	Ο	Ο
mia-30	57	Conserved in Enterobacteriaceae	Ο	Ο	Ο	Ο (A)	Ο	Ο	Ο	Ο	Ο	Ο	Ο
mia-31	13	S. Typhimurium-specific	Ο	Ο	Ο	Ο	Ο	Ο	Ο	Ο	Ο	Ο	Ο
mia-32	5	Unassigned	Ο	Ο	Ο	Ο	Ο	Ο	Ο	Ο	Ο	Ο	Ο
mia-33	43	Pathogenic Salmonella-specific	Ο	Ο	Ο	Ο	Ο	Ο	Ο	Ο	Ο	Ο	Ο
mia-34	14	Conserved in Enterobacteriaceae	Ο	Ο	Ο	Ο	Ο	Ο	Ο	Ο	Ο	Ο	Ο
mia-35	20	Conserved in Enterobacteriaceae	Ο	Ο	Ο	Ο	Ο	Ο	Ο	Ο	Ο	Ο	Ο
mia-36	64	Conserved in Enterobacteriaceae	Ο	Ο	Ο	Ο	Ο	Ο	Ο	Ο	Ο	Ο	Ο
mia-37	15	Salmonella-specific	Ο	Ο	Ο	Ο	Ο	Ο	Ο	Ο	Ο	Ο	Ο
mia-38	30	Conserved in Enterobacteriaceae	Ο	Ο	Ο	Ο	Ο	Ο	Ο	Ο	Ο	Ο	Ο
mia-39	31	Conserved in Enterobacteriaceae	Ο (A)	Ο	Ο	Ο	Ο	Ο	Ο	Ο	Ο	Ο	Ο
mia-40	24	Conserved in Enterobacteriaceae	Ο	Ο	Ο	Ο	Ο	Ο	Ο	Ο	Ο	Ο	Ο
mia-41	44	Pathogenic Salmonella-specific	Ο	Ο	Ο	Ο	Ο	Ο	Ο	Ο	Ο	Ο	Ο
mia-42	14	Conserved in Enterobacteriaceae	Ο (A)	Ο	Ο	Ο	Ο	Ο	Ο	Ο	Ο	Ο	Ο
mia-43	60	Conserved in Enterobacteriaceae	Ο	Ο	Ο	Ο	Ο	Ο	Ο	Ο	Ο	Ο	Ο
mia-44	21	Salmonella-specific	Ο	Ο	Ο	Ο	Ο	Ο	Ο	Ο	Ο	Ο	Ο
mia-45	30	Conserved in Enterobacteriaceae	Ο	Ο	Ο	Ο	Ο	Ο	Ο	Ο	Ο	Ο	Ο
mia-46	42	Conserved in Enterobacteriaceae	Ο	Ο	Ο	Ο	Ο	Ο	Ο	Ο	Ο	Ο	Ο
mia-47	27	Pathogenic Salmonella-specific	Ο	Ο	Ο	Ο	Ο	Ο	Ο	Ο	Ο	Ο	Ο
mia-48	24	Pathogenic Salmonella-specific	Ο	Ο	Ο	Ο	Ο	Ο	Ο	Ο	Ο	Ο	Ο
mia-49	30	Pathogenic Salmonella-specific	Ο	Ο	Ο	Ο	Ο	Ο	Ο	Ο	Ο	Ο	Ο
mia-50	42	Pathogenic Salmonella-specific	Ο	Ο	Ο	Ο	Ο	Ο	Ο	Ο	Ο	Ο	Ο
mia-51	20	S. Typhimurium-specific	Ο	Ο	Ο	Ο	Ο	Ο	Ο	Ο	Ο	Ο	Ο
mia-52	144	S. Typhimurium-specific	Ο	Χ	Χ	Ο (A)	Ο	Ο	Χ	Ο	Ο	Ο	Ο
mia-53	10	Unassigned	Ο	Χ	Χ	Ο	Ο	Ο	Χ	Ο	Ο	Ο	Ο
mia-54	28	Salmonella-specific	Ο	Ο	Ο	Ο	Ο	Ο	Ο	Ο	Ο	Ο	Ο
mia-55	73	Conserved in Enterobacteriaceae	Ο	Ο	Ο	Ο	Ο	Ο	Ο	Ο	Ο	Ο	Ο
mia-56	20	Conserved in Enterobacteriaceae	Ο	Ο	Ο	Ο	Ο	Ο	Ο	Ο	Ο	Ο	Ο
mia-57	16	Conserved in Enterobacteriaceae	Ο	Ο	Ο	Ο	Ο	Ο	Ο	Ο	Ο	Ο	Ο
mia-58	27	Conserved in Enterobacteriaceae	Ο	Ο	Ο	Ο	Ο	Ο	Ο	Ο	Ο	Ο	Ο
mia-59	23	Conserved in Enterobacteriaceae	Ο	Ο	Ο	Ο	Ο	Ο	Ο	Ο	Ο	Ο	Ο
mia-60	19	Conserved in Enterobacteriaceae	Ο	Ο	Ο	Ο	Ο	Ο	Ο	Ο	Ο	Ο	Ο
mia-61	33	S. Typhimurium and S. bongori-specific	Ο	Ο	Ο	Ο	Ο	Ο	Ο	Ο	Ο	Ο	Ο
mia-62	38	Conserved in Enterobacteriaceae	Ο	Ο	Ο	Ο	Ο	Ο	Ο	Ο	Ο	Ο	Ο
mia-63	45	S. Typhimurium-specific	Ο	Ο	Ο	Ο	Ο	Ο	Ο	Χ	Ο	Ο	Ο
mia-64	46	S. Typhimurium-specific	Ο	Ο	Ο	Ο	Ο	Ο	Ο	Χ	Ο	Ο	Ο
mia-65	61	Conserved in Enterobacteriaceae	Ο	Ο (A)	Ο	Ο	Ο	Ο	Ο	Χ	Ο	Ο	Ο
mia-66	13	Conserved in Enterobacteriaceae	Ο	Ο	Ο	Ο	Ο	Ο	Ο	Ο	Ο	Ο	Ο
mia-67	15	Pathogenic Salmonella-specific	Ο	Ο	Ο	Ο (A)	Ο	Ο	Ο	Ο	Ο	Ο	Ο
mia-68	45	Conserved in Enterobacteriaceae	Ο	Ο	Ο	Ο	Ο	Ο	Ο	Ο	Ο	Ο	Ο
mia-69	7	Unassigned	Ο	Ο	Ο	Ο	Ο	Ο	Ο	Ο	Ο	Ο	Ο
mia-70	103	Pathogenic Salmonella-specific	Ο	Ο	Ο	Ο	Ο (A)	Ο	Ο	Ο	Ο (A)	Ο	Ο (A)
mia-71	10	Unassigned	Ο	Ο	Ο	Ο	Ο	Ο	Ο	Ο	Ο	Ο	Ο
mia-72	21	Pathogenic Salmonella-specific	Ο	Ο	Ο	Ο	Ο	Ο	Ο	Ο	Ο	Ο	Ο
mia-73	93	Conserved in Enterobacteriaceae	Ο	Ο	Ο	Ο	Ο	Ο	Ο	Ο	Ο	Ο	Ο
mia-74	18	Conserved in Enterobacteriaceae	Ο	Ο	Ο	Ο	Ο	Ο	Ο	Ο	Ο	Ο	Ο
mia-75	20	Salmonella-specific	Ο	Ο	Ο	Ο	Ο	Ο	Ο	Ο	Ο	Ο	Ο
mia-76	26	Pathogenic Salmonella-specific	Ο	Ο	Ο	Ο	Ο	Ο	Ο	Ο	Ο	Ο	Ο
mia-77	33	Pathogenic Salmonella-specific	Ο	Ο	Ο	Ο	Ο	Ο	Ο	Ο	Ο	Ο	Ο
mia-78	39	Pathogenic Salmonella-specific	Ο	Ο	Ο	Ο	Ο	Ο	Ο	Ο	Ο	Ο	Ο
mia-79	19	Salmonella-specific	Ο	Ο	Ο	Ο	Ο	Ο	Ο	Ο	Ο	Ο	Ο
mia-80	9	Unassigned	Ο	Ο	Ο	Ο	Ο	Ο	Ο	Ο	Ο	Ο	Ο
mia-81	31	Pathogenic Salmonella-specific	Ο	Ο	Ο	Ο	Ο	Ο	Ο	Ο	Ο	Ο	Ο
mia-82	22	Pathogenic Salmonella-specific	Ο	Ο	Ο	Ο	Ο	Ο	Ο	Ο	Ο	Ο	Ο
mia-83	57	Conserved in Enterobacteriaceae	Ο	Ο	Ο	Ο	Χ	Ο	Ο	Ο	Ο	Ο	Ο
mia-84	31	Conserved in Enterobacteriaceae	Ο	Ο	Ο	Ο	Ο	Ο	Ο	Ο	Ο	Ο	Ο
mia-85	39	Conserved in Enterobacteriaceae	Ο	Ο	Ο	Ο	Ο	Ο	Ο	Ο	Ο	Ο	Ο
mia-86	58	Conserved in Enterobacteriaceae	Ο	Ο	Ο	Ο	Ο	Ο	Ο	Ο	Ο	Ο	Ο
mia-87	34	Conserved in Enterobacteriaceae	Ο	Ο	Ο	Ο	Ο	Ο	Ο	Ο	Ο	Ο	Ο
mia-88	73	S. Typhimurium-specific	Ο	Ο	Ο	Ο	Ο	Ο	Ο	Ο	Ο	Ο	Ο
mia-89	53	Conserved in Enterobacteriaceae	Ο	Ο	Ο	Ο	Ο	Ο	Ο	Ο	Ο	Ο	Ο
mia-90	12	Unassigned	Ο	Ο	Ο	Ο	Ο	Ο	Ο	Ο	Ο	Ο	Ο
mia-91	8	Unassigned	Ο	Ο	Ο	Ο	Ο	Ο	Ο	Ο	Ο	Ο	Ο
mia-92	17	Pathogenic Salmonella-specific	Ο	Ο	Ο	Ο	Ο	Ο	Ο	Ο	Ο	Ο	Ο
mia-93	22	Conserved in Enterobacteriaceae	Ο	Ο	Ο	Ο	Ο	Ο	Ο	Ο	Ο	Ο	Ο
mia-94	8	Unassigned	Ο	Ο	Ο	Ο	Ο	Ο	Ο	Ο	Ο	Ο	Ο
mia-95	23	Conserved in Enterobacteriaceae	Ο	Ο	Ο	Ο	Ο	Ο	Ο	Ο	Ο	Ο	Ο
mia-96	35	Conserved in Enterobacteriaceae	Ο	Ο	Ο	Ο (A)	Ο	Ο	Ο	Ο	Ο	Ο	Ο
mia-97	17	Pathogenic Salmonella-specific	Ο	Ο	Ο	Ο	Ο	Ο	Ο	Ο	Ο	Ο	Ο
mia-98	30	Pathogenic Salmonella-specific	Ο	Ο	Ο	Ο	Ο	Ο	Ο	Ο	Ο	Ο	Ο
mia-99	39	Conserved in Enterobacteriaceae	Ο	Ο	Ο	Ο	Ο	Ο	Ο	Ο	Ο	Ο	Ο
mia-100	15	S. Typhimurium and S. bongori-specific	Ο	Ο	Ο	Ο	Ο	Ο	Ο	Ο	Ο	Ο	Ο
mia-101	28	Salmonella-specific	Ο	Ο	Ο	Ο	Ο	Ο	Ο	Ο	Ο	Ο	Ο
mia-102	30	S. Typhimurium and S. bongori-specific	Ο	Ο	Ο	Ο	Ο	Ο	Ο	Ο	Ο	Ο	Ο
mia-103	13	Salmonella-specific	Ο	Ο	Ο	Ο	Ο	Ο	Ο	Ο	Ο	Ο	Ο
mia-104	12	Conserved in Enterobacteriaceae	Ο	Ο	Ο	Ο	Ο	Ο	Ο	Ο	Ο	Ο	Ο
mia-105	20	Pathogenic Salmonella-specific	Ο	Ο	Ο	Ο	Ο	Ο	Ο	Ο	Ο	Ο	Ο
mia-106	45	Conserved in Enterobacteriaceae	Ο	Ο	Ο	Ο	Ο	Ο	Ο	Ο	Ο	Ο	Ο
mia-107	16	Conserved in Enterobacteriaceae	Ο	Ο	Ο	Ο	Ο	Ο	Ο	Ο	Ο	Ο	Ο
mia-108	52	Conserved in Enterobacteriaceae	Ο (A)	Ο	Ο	Ο	Ο	Ο	Ο	Ο	Ο	Ο	Ο
mia-109	16	Salmonella-specific	Ο	Ο	Ο	Ο	Ο	Ο	Ο	Ο	Ο	Ο	Ο
mia-110	4	Conserved in S. Typhimurium and E. coli K-12	Ο	Ο	Ο	Ο	Ο	Ο	Ο	Ο	Ο	Ο	Ο
mia-111	13	Pathogenic Salmonella-specific	Ο	Ο	Ο	Ο	Ο	Ο	Ο	Ο	Ο	Ο	Ο
mia-112	18	Conserved in Enterobacteriaceae	Ο	Ο	Ο	Ο	Ο	Ο	Ο	Ο	Ο	Ο	Ο
mia-113	22	Conserved in Enterobacteriaceae	Ο	Ο	Ο	Ο	Ο	Ο	Ο	Ο	Ο	Ο	Ο
mia-114	36	Conserved in Enterobacteriaceae	Ο	Ο	Ο	Ο	Ο	Ο	Ο	Ο	Ο	Ο	Ο
mia-115	20	Conserved in Enterobacteriaceae	Ο	Ο	Ο	Ο	Ο	Ο	Ο	Ο	Ο	Ο	Ο
mia-116	32	Conserved in Enterobacteriaceae	Ο	Ο	Ο	Ο	Ο	Ο	Ο	Ο	Ο	Ο	Ο
mia-117	14	S. Typhimurium-specific	Ο	Ο	Ο	Ο	Ο	Ο	Ο	Ο	Ο	Ο	Ο
mia-118	39	Conserved in Enterobacteriaceae	Ο	Ο	Ο	Ο	Ο	Ο	Ο	Ο	Ο	Ο	Ο
mia-119	46	Salmonella-specific	Ο	Ο	Ο	Ο	Ο	Ο	Ο	Ο	Ο	Ο	Ο
mia-120	16	Conserved in Enterobacteriaceae	Ο	Ο	Ο	Ο	Ο	Ο	Ο	Ο	Ο	Ο	Ο
mia-121	34	Salmonella-specific	Ο	Ο	Ο	Ο	Ο	Ο	Ο	Ο	Ο	Ο	Ο
mia-122	22	Salmonella-specific	Ο	Ο	Ο	Ο	Ο	Ο	Ο	Ο	Ο	Ο	Ο
mia-123	32	Pathogenic Salmonella-specific	Ο	Ο	Ο	Ο	Ο	Ο	Ο	Ο	Ο	Ο	Ο
mia-124	21	Salmonella-specific	Ο	Ο	Ο	Ο	Ο	Ο	Ο	Ο	Ο	Ο	Ο
mia-125	20	Salmonella-specific	Ο	Ο	Ο	Ο	Ο	Ο	Ο	Ο	Ο	Ο	Ο
mia-126	17	Conserved in Enterobacteriaceae	Ο	Ο	Ο	Ο	Ο	Ο	Ο	Ο	Ο	Ο	Ο
mia-127	7	Unassigned	Ο	Ο	Ο	Ο	Ο	Ο	Ο	Ο	Ο	Ο	Ο
mia-128	11	Unassigned	Ο	Ο	Ο	Ο	Ο	Ο	Ο	Ο	Ο	Ο	Ο
mia-129	51	Conserved in Enterobacteriaceae	Ο	Ο	Ο	Ο	Ο	Ο	Ο	Ο	Ο	Ο	Ο
mia-130	76	Conserved in Enterobacteriaceae	Ο	Ο	Ο	Ο	Ο	Ο	Ο	Ο	Ο	Ο	Ο
a Conserved
b Conserved and annotated
c Absent
d Two paralogs are present
