# Supplementary material for: Identification of Unannotated Small Genes in Salmonella
Source: G3 (Bethesda). 2017 Jan 25;7(3):983–9. doi: 10.1534/g3.116.036939 (PMC5345727; doi:10.1534/g3.116.036939)
Supplement: Supplementary file 11 [file 983TableS13.xlsx]

## Sheet: Table S13
Table S13 Conservation of mia genes in non-S. Typhimurium Gram negative enterica bacteria
mia-# (missing in annotation)	Conservation checked by BLAST	E. coli K-12 MG1655	S. bongori NCTC 12419	S. Paratyphi ATCC 9150	S. Typhi CT18	E. coli O157 EC4115	E. coli UT189	E. cloacae ATCC 13407	S. dysenteriae 1617	S. flexneri 2002017	K. oxytoca E718	K. pneumoniae 342	S. marcescens WW4	Y. enterocolitica Y11	Y. pestis A1122	V. cholerae El Tor N16961
mia-1	Conserved in Enterobacteriaceae	Οa	Ο	Ο	Ο	Ο	Ο	Χc	Ο	Ο	Ο	Χ	Ο	Χ	Χ	Ο
mia-2	S. Typhimurium-specific	Χ	Χ	Χ	Χ	Χ	Χ	Χ	Χ	Χ	Χ	Χ	Χ	Χ	Χ	Χ
mia-3	Salmonella-specific	Χ	Χ	Ο	Ο	Χ	Χ	Χ	Χ	Χ	Χ	Χ	Χ	Χ	Χ	Χ
mia-4	Unassigned	Χ	Χ	Ο	Ο	Χ	Χ	Χ	Χ	Χ	Χ	Χ	Χ	Χ	Χ	Χ
mia-5	Salmonella-specific	Χ	Ο	Ο	Ο	Χ	Χ	Χ	Χ	Χ	Χ	Χ	Χ	Χ	Χ	Χ
mia-6	Conserved in Enterobacteriaceae	Ο	Ο	Ο	Ο	Χ	Χ	Ο	Χ	Χ	Ο	Ο	Ο	Ο	Ο	Χ
mia-7	Conserved in Enterobacteriaceae	Ο	Ο	Ο	Ο	Ο	Ο	Χ	Ο (A)b	Ο	Ο	Χ	Χ	Χ	Χ	Χ
mia-8	Conserved in Enterobacteriaceae	Ο	Ο	Ο	Ο	Ο	Ο	Ο	Χ	Ο	Χ	Χ	Ο	Ο (2)d	Χ	Ο
mia-9	Salmonella-specific	Χ	Ο	Ο	Ο	Χ	Χ	Χ	Χ	Χ	Χ	Χ	Χ	Χ	Χ	Χ
mia-10	Salmonella-specific	Χ	Ο	Ο	Ο	Χ	Χ	Χ	Χ	Χ	Χ	Χ	Χ	Χ	Χ	Χ
mia-11	Salmonella-specific	Χ	Ο	Ο	Ο	Χ	Χ	Χ	Χ	Χ	Χ	Χ	Χ	Χ	Χ	Χ
mia-12	Unassigned	Ο	Ο	Ο	Ο	Χ	Χ	Χ	Ο	Χ	Χ	Χ	Χ	Χ	Χ	Χ
mia-13	Salmonella-specific	Χ	Ο	Ο	Ο	Χ	Χ	Χ	Χ	Χ	Χ	Χ	Χ	Χ	Χ	Χ
mia-14	Salmonella-specific	Χ	Ο	Ο	Ο	Χ	Χ	Χ	Χ	Χ	Χ	Χ	Χ	Χ	Χ	Χ
mia-15	Salmonella-specific	Χ	Ο	Ο	Ο	Χ	Χ	Χ	Χ	Χ	Χ	Χ	Χ	Χ	Χ	Χ
mia-16	Conserved in Enterobacteriaceae	Ο	Ο	Ο	Ο	Ο	Ο	Χ	Ο	Ο	Χ	Χ	Χ	Χ	Χ	Χ
mia-17	Conserved in Enterobacteriaceae	Ο	Ο	Ο	Ο	Ο	Ο	Χ	Ο	Ο	Χ	Χ	Χ	Χ	Χ	Χ
mia-18	Conserved in Enterobacteriaceae	Ο	Ο	Ο	Ο	Ο	Ο	Χ	Ο	Χ	Χ	Χ	Χ	Χ	Χ	Χ
mia-19	S. Typhimurium-specific	Χ	Χ	Χ	Χ	Χ	Χ	Χ	Χ	Χ	Χ	Χ	Χ	Χ	Χ	Χ
mia-20	Salmonella-specific	Χ	Ο	Ο	Ο	Χ	Χ	Χ	Χ	Χ	Χ	Χ	Χ	Ο	Χ	Χ
mia-21	Salmonella-specific	Χ	Ο	Ο	Ο	Χ	Χ	Χ	Χ	Χ	Χ	Χ	Χ	Χ	Χ	Χ
mia-22	S. Typhimurium-specific	Χ	Χ	Χ	Χ	Χ	Χ	Χ	Χ	Χ	Χ	Χ	Χ	Χ	Χ	Χ
mia-23	Salmonella-specific	Χ	Ο	Ο	Ο	Χ	Χ	Χ	Χ	Χ	Χ	Χ	Χ	Χ	Χ	Χ
mia-24	Pathogenic Salmonella-specific	Χ	Χ	Ο	Ο	Χ	Χ	Χ	Χ	Χ	Χ	Χ	Χ	Χ	Χ	Χ
mia-25	14028s specific (Gifsy-3)	Χ	Χ	Χ	Χ	Χ	Χ	Χ	Χ	Χ	Χ	Χ	Χ	Χ	Χ	Χ
mia-26	Salmonella-specific	Χ	Ο	Ο	Ο	Χ	Χ	Χ	Χ	Χ	Χ	Χ	Χ	Χ	Χ	Χ
mia-27	Pathogenic Salmonella-specific	Χ	Χ	Ο	Ο	Χ	Χ	Χ	Χ	Χ	Χ	Χ	Χ	Χ	Χ	Χ
mia-28	Salmonella-specific	Χ	Ο	Ο	Ο	Χ	Χ	Χ	Χ	Χ	Χ	Χ	Χ	Χ	Χ	Χ
mia-29	S. Typhimurium-specific	Χ	Χ	Χ	Χ	Χ	Χ	Χ	Χ	Χ	Χ	Χ	Χ	Χ	Χ	Χ
mia-30	Conserved in Enterobacteriaceae	Χ	Ο	Χ	Ο	Χ	Χ	Ο (A)	Χ	Χ	Χ	Χ	Χ	Χ	Χ	Χ
mia-31	S. Typhimurium-specific	Χ	Χ	Χ	Χ	Χ	Χ	Χ	Χ	Χ	Χ	Χ	Χ	Χ	Χ	Χ
mia-32	Unassigned	Ο	Χ	Ο	Ο	Χ	Χ	Χ	Χ	Χ	Χ	Χ	Χ	Χ	Χ	Χ
mia-33	Pathogenic Salmonella-specific	Χ	Χ	Ο	Ο	Χ	Χ	Χ	Χ	Χ	Χ	Χ	Χ	Χ	Χ	Χ
mia-34	Conserved in Enterobacteriaceae	Ο (A)	Ο	Ο	Ο	Ο	Ο	Ο	Ο	Ο	Χ	Ο	Χ	Χ	Χ	Χ
mia-35	Conserved in Enterobacteriaceae	Χ	Ο	Ο	Ο	Χ	Χ	Χ	Χ	Χ	Χ	Ο	Χ	Χ	Χ	Χ
mia-36	Conserved in Enterobacteriaceae	Ο	Ο	Ο	Ο	Ο	Ο	Ο	Ο	Ο	Ο	Ο	Χ	Χ	Χ	Χ
mia-37	Salmonella-specific	Χ	Ο	Ο	Ο	Χ	Χ	Χ	Χ	Χ	Χ	Χ	Χ	Χ	Χ	Χ
mia-38	Conserved in Enterobacteriaceae	Ο	Ο	Ο	Ο	Ο	Ο	Χ	Χ	Ο	Ο	Ο	Χ	Χ	Χ	Χ
mia-39	Conserved in Enterobacteriaceae	Ο (A)	Ο (A)	Ο (A)	Ο	Ο	Ο (A)	Χ	Ο	Ο (A)	Ο	Χ	Χ	Χ	Χ	Χ
mia-40	Conserved in Enterobacteriaceae	Ο	Ο	Ο	Ο	Ο	Ο	Ο	Ο	Ο	Ο	Χ	Χ	Ο	Ο	Χ
mia-41	Pathogenic Salmonella-specific	Χ	Χ	Χ	Ο	Χ	Χ	Χ	Χ	Χ	Χ	Χ	Χ	Χ	Χ	Χ
mia-42	Conserved in Enterobacteriaceae	Ο (A)	Ο (A)	Ο	Ο	Χ	Ο (A)	Χ	Ο (A)	Ο (A)	Χ	Χ	Χ	Χ	Χ	Χ
mia-43	Conserved in Enterobacteriaceae	Χ	Ο (A)	Ο	Ο	Χ	Χ	Ο	Χ	Χ	Χ	Χ	Χ	Χ	Χ	Χ
mia-44	Salmonella-specific	Χ	Ο	Ο	Ο	Χ	Χ	Χ	Χ	Χ	Χ	Χ	Χ	Χ	Χ	Χ
mia-45	Conserved in Enterobacteriaceae	Ο	Ο	Ο	Ο	Ο	Ο	Ο	Ο	Ο	Χ	Χ	Χ	Χ	Χ	Χ
mia-46	Conserved in Enterobacteriaceae	Ο (A)	Ο (A)	Ο (A)	Ο	Ο (A)	Ο (A)	Ο (A)	Ο (A)	Ο (A)	Ο	Χ	Ο	Χ	Χ	Χ
mia-47	Pathogenic Salmonella-specific	Χ	Χ	Ο	Ο	Χ	Χ	Χ	Χ	Χ	Χ	Χ	Χ	Χ	Χ	Χ
mia-48	Pathogenic Salmonella-specific	Χ	Ο	Ο	Ο	Χ	Χ	Χ	Χ	Χ	Χ	Χ	Χ	Χ	Χ	Χ
mia-49	Pathogenic Salmonella-specific	Χ	Ο	Ο	Ο	Χ	Χ	Χ	Χ	Χ	Χ	Χ	Χ	Χ	Χ	Χ
mia-50	Pathogenic Salmonella-specific	Χ	Χ	Ο	Ο	Χ	Χ	Χ	Χ	Χ	Χ	Χ	Χ	Χ	Χ	Χ
mia-51	S. Typhimurium-specific	Χ	Χ	Χ	Χ	Χ	Χ	Χ	Χ	Χ	Χ	Χ	Χ	Χ	Χ	Χ
mia-52	S. Typhimurium-specific	Χ	Χ	Χ	Χ	Χ	Χ	Χ	Χ	Χ	Χ	Χ	Χ	Χ	Χ	Χ
mia-53	Unassigned	Χ	Χ	Χ	Χ	Χ	Χ	Χ	Χ	Χ	Χ	Χ	Χ	Χ	Χ	Χ
mia-54	Salmonella-specific	Χ	Χ	Ο	Ο	Χ	Χ	Χ	Χ	Χ	Χ	Χ	Χ	Χ	Χ	Χ
mia-55	Conserved in Enterobacteriaceae	Ο	Ο	Ο	Ο	Ο	Ο	Ο	Ο	Ο	Ο	Ο	Ο	Ο	Χ	Χ
mia-56	Conserved in Enterobacteriaceae	Ο (A)	Ο	Ο	Ο	Ο	Ο	Ο	Ο	Ο	Ο	Ο	Χ	Χ	Χ	Χ
mia-57	Conserved in Enterobacteriaceae	Ο (A)	Ο	Ο	Ο (A)	Ο	Ο	Χ	Χ	Χ	Χ	Χ	Χ	Χ	Χ	Χ
mia-58	Conserved in Enterobacteriaceae	Ο (A)	Ο	Ο	Ο	Ο	Ο (A)	Ο	Ο	Ο (A)	Χ	Χ	Ο	Χ	Χ	Χ
mia-59	Conserved in Enterobacteriaceae	Ο (A)	Ο	Ο	Ο	Ο	Ο	Ο	Ο (A)	Ο	Ο	Ο	Ο	Ο	Χ	Χ
mia-60	Conserved in Enterobacteriaceae	Ο (A)	Ο	Ο	Ο	Ο	Ο	Ο	Ο	Ο	Ο	Ο	Ο	Ο	Ο	Χ
mia-61	S. Typhimurium and S. bongori-specific	Χ	Ο	Χ	Χ	Χ	Χ	Χ	Χ	Χ	Χ	Χ	Χ	Χ	Χ	Χ
mia-62	Conserved in Enterobacteriaceae	Χ	Ο	Ο	Ο	Ο	Ο	Χ	Ο	Ο	Χ	Χ	Χ	Χ	Χ	Χ
mia-63	S. Typhimurium-specific	Χ	Χ	Χ	Χ	Χ	Χ	Χ	Χ	Χ	Χ	Χ	Χ	Χ	Χ	Χ
mia-64	S. Typhimurium-specific	Χ	Χ	Χ	Χ	Χ	Χ	Χ	Χ	Χ	Χ	Χ	Χ	Χ	Χ	Χ
mia-65	Conserved in Enterobacteriaceae	Χ	Ο	Χ	Χ	Ο	Χ	Χ	Χ	Χ	Χ	Χ	Χ	Χ	Ο	Χ
mia-66	Conserved in Enterobacteriaceae	Ο	Ο	Ο	Ο	Ο	Ο	Χ	Ο	Ο	Χ	Χ	Χ	Χ	Χ	Χ
mia-67	Pathogenic Salmonella-specific	Χ	Χ	Ο (A)	Ο (A)	Χ	Χ	Χ	Χ	Χ	Χ	Χ	Χ	Χ	Χ	Χ
mia-68	Conserved in Enterobacteriaceae	Ο	Ο	Ο	Ο	Ο	Ο	Ο	Ο	Ο	Ο	Ο	Ο	Ο	Ο	Ο
mia-69	Unassigned	Χ	Χ	Χ	Χ	Χ	Χ	Χ	Χ	Χ	Χ	Χ	Χ	Χ	Χ	Χ
mia-70	Pathogenic Salmonella-specific	Χ	Χ	Ο	Ο	Χ	Χ	Χ	Χ	Χ	Χ	Χ	Χ	Χ	Χ	Χ
mia-71	Unassignedc	Χ	Χ	Χ	Ο	Χ	Χ	Χ	Χ	Χ	Χ	Χ	Χ	Χ	Χ	Χ
mia-72	Pathogenic Salmonella-specific	Χ	Χ	Ο	Ο	Χ	Χ	Χ	Χ	Χ	Χ	Χ	Χ	Χ	Χ	Χ
mia-73	Conserved in Enterobacteriaceae	Χ	Ο	Ο	Ο	Ο	Ο	Χ	Χ	Ο	Χ	Ο	Χ	Ο	Χ	Χ
mia-74	Conserved in Enterobacteriaceae	Ο	Ο	Ο	Ο	Ο	Ο	Ο	Ο (A)	Ο	Ο	Ο	Ο	Ο	Ο	Χ
mia-75	Salmonella-specific	Χ	Ο	Ο	Ο	Χ	Χ	Χ	Χ	Χ	Χ	Χ	Χ	Χ	Χ	Χ
mia-76	Pathogenic Salmonella-specific	Χ	Χ	Ο	Ο	Χ	Χ	Χ	Χ	Χ	Χ	Χ	Χ	Χ	Χ	Χ
mia-77	Pathogenic Salmonella-specific	Χ	Χ	Ο	Ο	Χ	Χ	Χ	Χ	Χ	Χ	Χ	Χ	Χ	Χ	Χ
mia-78	Pathogenic Salmonella-specific	Χ	Χ	Ο	Ο	Χ	Χ	Χ	Χ	Χ	Χ	Χ	Χ	Χ	Χ	Χ
mia-79	Salmonella-specific	Χ	Ο	Ο	Ο	Χ	Χ	Χ	Χ	Χ	Χ	Χ	Χ	Χ	Χ	Χ
mia-80	Unassigned	Χ	Χ	Ο	Ο	Χ	Χ	Χ	Χ	Χ	Χ	Χ	Χ	Χ	Χ	Χ
mia-81	Pathogenic Salmonella-specific	Χ	Χ	Ο	Ο	Χ	Χ	Χ	Χ	Χ	Χ	Χ	Χ	Χ	Χ	Χ
mia-82	Pathogenic Salmonella-specific	Χ	Χ	Ο	Ο	Χ	Χ	Χ	Χ	Χ	Χ	Χ	Χ	Χ	Χ	Χ
mia-83	Conserved in Enterobacteriaceae	Ο	Ο	Ο	Ο	Χ	Χ	Χ	Ο	Χ	Ο	Χ	Χ	Χ	Χ	Χ
mia-84	Conserved in Enterobacteriaceae	Ο	Ο	Ο	Ο	Ο	Ο	Ο	Ο	Ο	Ο	Ο	Χ	Ο	Χ	Χ
mia-85	Conserved in Enterobacteriaceae	Ο	Ο	Ο	Ο	Ο	Ο	Ο	Ο	Ο	Ο	Ο	Χ	Χ	Χ	Χ
mia-86	Conserved in Enterobacteriaceae	Χ	Ο	Ο	Ο	Χ	Χ	Ο	Χ	Χ	Χ	Χ	Χ	Χ	Χ	Χ
mia-87	Conserved in Enterobacteriaceae	Ο	Ο	Ο	Ο	Ο	Ο	Ο	Ο (A)	Ο	Ο	Ο	Χ	Ο	Ο	Χ
mia-88	S. Typhimurium-specific	Χ	Χ	Χ	Χ	Χ	Χ	Χ	Χ	Χ	Χ	Χ	Χ	Χ	Χ	Χ
mia-89	Conserved in Enterobacteriaceae	Ο	Ο	Ο	Ο	Ο	Ο	Ο	Ο	Ο	Ο	Ο	Χ	Χ	Χ	Χ
mia-90	Unassigned	Χ	Χ	Χ	Χ	Χ	Χ	Χ	Χ	Χ	Χ	Χ	Χ	Χ	Χ	Χ
mia-91	Unassigned	Χ	Χ	Ο	Ο	Χ	Χ	Χ	Χ	Χ	Χ	Χ	Χ	Χ	Χ	Χ
mia-92	Pathogenic Salmonella-specific	Χ	Χ	Ο	Ο	Χ	Χ	Χ	Χ	Χ	Χ	Χ	Χ	Χ	Χ	Χ
mia-93	Conserved in Enterobacteriaceae	Χ	Ο	Ο	Ο	Ο	Ο	Χ	Ο	Ο	Ο	Ο	Χ	Χ	Χ	Χ
mia-94	Unassignede	Ο	Ο	Ο	Ο	Χ	Χ	Χ	Χ	Χ	Χ	Χ	Χ	Χ	Χ	Χ
mia-95	Conserved in Enterobacteriaceae	Ο	Ο	Ο	Ο	Ο	Ο	Χ	Ο (A)	Ο	Χ	Χ	Χ	Χ	Χ	Χ
mia-96	Conserved in Enterobacteriaceae	Ο (A)	Χ	Ο (A)	Ο (A)	Ο (A)	Ο (A)	Χ	Ο (A)	Ο (A)	Ο	Χ	Χ	Χ	Χ	Χ
mia-97	Pathogenic Salmonella-specific	Χ	Χ	Ο	Ο	Χ	Χ	Χ	Χ	Χ	Χ	Χ	Χ	Χ	Χ	Χ
mia-98	Pathogenic Salmonella-specific	Χ	Χ	Ο	Ο	Χ	Χ	Χ	Χ	Χ	Χ	Χ	Χ	Χ	Χ	Χ
mia-99	Conserved in Enterobacteriaceae	Ο	Ο (A)	Ο	Ο	Ο	Ο	Χ	Ο	Ο	Χ	Χ	Χ	Ο	Ο	Χ
mia-100	S. Typhimurium and S. bongori-specific	Χ	Ο	Χ	Χ	Χ	Χ	Χ	Χ	Χ	Χ	Χ	Χ	Χ	Χ	Χ
mia-101	Salmonella-specific	Χ	Ο	Ο	Ο	Χ	Χ	Χ	Χ	Χ	Χ	Χ	Χ	Χ	Χ	Χ
mia-102	S. Typhimurium and S. bongori-specific	Χ	Χ	Ο	Ο	Χ	Χ	Χ	Χ	Χ	Ο	Χ	Χ	Χ	Χ	Χ
mia-103	Salmonella-specific	Χ	Ο	Ο	Ο	Χ	Χ	Χ	Χ	Χ	Χ	Χ	Χ	Χ	Χ	Χ
mia-104	Conserved in Enterobacteriaceae	Ο	Ο	Ο	Ο	Ο	Ο	Ο	Ο	Ο	Χ	Ο	Χ	Χ	Χ	Χ
mia-105	Pathogenic Salmonella-specific	Χ	Χ	Ο	Ο	Χ	Χ	Χ	Χ	Χ	Χ	Χ	Χ	Χ	Χ	Χ
mia-106	Conserved in Enterobacteriaceae	Ο	Ο	Ο	Ο	Ο	Ο	Ο	Ο	Ο	Ο	Ο	Ο	Ο	Χ	Χ
mia-107	Conserved in Enterobacteriaceae	Ο (A)	Ο	Ο	Ο	Χ	Χ	Χ	Χ	Χ	Χ	Χ	Χ	Χ	Χ	Χ
mia-108	Conserved in Enterobacteriaceae	Χ	Ο (A)	Ο	Ο	Χ	Χ	Χ	Χ	Χ	Ο	Χ	Χ	Χ	Χ	Χ
mia-109	Salmonella-specific	Χ	Ο	Ο	Ο	Χ	Χ	Χ	Χ	Χ	Χ	Χ	Χ	Χ	Χ	Χ
mia-110	Conserved in S. Typhimurium and E. coli K-12	Ο	Χ	Χ	Χ	Χ	Χ	Χ	Χ	Χ	Χ	Χ	Χ	Χ	Χ	Χ
mia-111	Pathogenic Salmonella-specific	Χ	Χ	Ο	Ο	Χ	Χ	Χ	Χ	Χ	Χ	Χ	Χ	Χ	Χ	Χ
mia-112	Conserved in Enterobacteriaceae	Ο	Ο	Ο	Ο	Ο	Ο	Ο	Ο	Ο	Χ	Χ	Χ	Χ	Χ	Χ
mia-113	Conserved in Enterobacteriaceae	Χ	Ο	Ο	Ο	Χ	Χ	Χ	Ο (A)	Χ	Χ	Χ	Χ	Χ	Χ	Χ
mia-114	Conserved in Enterobacteriaceae	Ο (A)	Ο	Ο	Ο	Ο	Ο	Ο	Ο	Ο	Ο	Ο	Χ	Χ	Χ	Χ
mia-115	Conserved in Enterobacteriaceae	Ο	Ο	Ο2	Ο	Ο	Ο	Χ	Ο (A)	Ο	Ο	Χ	Χ	Χ	Ο	Χ
mia-116	Conserved in Enterobacteriaceae	Ο	Ο	Ο	Ο	Ο	Ο	Ο	Ο	Ο	Ο	Ο	Χ	Χ	Χ	Χ
mia-117	S. Typhimurium-specific	Χ	Χ	Χ	Χ	Χ	Χ	Χ	Χ	Χ	Χ	Χ	Χ	Χ	Χ	Χ
mia-118	Conserved in Enterobacteriaceae	Ο	Ο	Ο	Ο	Ο	Ο	Ο	Ο	Ο	Χ	Ο	Ο	Χ	Χ	Χ
mia-119	Salmonella-specific	Χ	Ο	Ο	Ο	Χ	Χ	Χ	Χ	Χ	Χ	Χ	Χ	Χ	Χ	Χ
mia-120	Conserved in Enterobacteriaceae	Ο	Ο	Ο	Ο	Ο	Ο	Ο	Χ	Ο	Ο	Χ	Ο	Χ	Χ	Χ
mia-121	Salmonella-specific	Χ	Ο	Ο	Ο	Χ	Χ	Χ	Χ	Χ	Χ	Χ	Χ	Χ	Χ	Χ
mia-122	Salmonella-specific	Χ	Ο	Ο	Ο	Χ	Χ	Χ	Χ	Χ	Χ	Χ	Χ	Χ	Χ	Χ
mia-123	Pathogenic Salmonella-specific	Χ	Χ	Ο	Ο	Χ	Χ	Χ	Χ	Χ	Χ	Χ	Χ	Χ	Χ	Χ
mia-124	Salmonella-specific	Χ	Ο	Ο	Ο	Χ	Χ	Χ	Χ	Χ	Χ	Χ	Χ	Χ	Χ	Χ
mia-125	Salmonella-specific	Χ	Ο	Ο	Ο	Χ	Χ	Χ	Χ	Χ	Χ	Χ	Χ	Χ	Χ	Χ
mia-126	Conserved in Enterobacteriaceae	Ο	Ο	Ο	Ο	Ο	Ο	Χ	Ο	Ο	Ο	Ο	Χ	Χ	Χ	Χ
mia-127	Unassigned	Χ	Χ	Ο	Ο	Χ	Χ	Ο	Χ	Χ	Χ	Χ	Χ	Χ	Χ	Χ
mia-128	Unassigned	Ο	Ο	Ο	Ο	Ο	Ο	Ο	Ο	Ο	Ο	Ο	Ο	Ο	Ο	Χ
mia-129	Conserved in Enterobacteriaceae	Ο	Ο	Ο	Ο	Ο	Ο	Ο	Ο	Ο	Ο	Ο	Ο	Ο	Χ	Χ
mia-130	Conserved in Enterobacteriaceae	Ο	Ο	Ο	Ο	Ο	Ο	Ο	Ο	Ο	Ο	Ο	Ο	Χ	Ο	Χ
a Conserved
b Conserved and annotated
c Absent
d Two paralogs are present
e Conservation of this ORF was checked manually in corresponding gentic loci in different bacterial species; It is still possible that this ORF is present in other loci in bacterial genomes apparently lacking it.
